# Supplementary material
Source: PubMed Central journal article supplement (PMC3526834)
Supplement: NIHMS418573-supplement-1.pdf [file NIHMS418573-supplement-1.pdf]

**eText:** Description of the g-formula and the included variables

We use the following notation to represent the variables and indices used in the formula. We use over-bars to indicate the history of time-dependent variables starting from time 0:

$k$ : counter for discrete time periods of follow-up starting at 0 and ending at  $K+1$

$a(j)$ : treatment value during interval  $j$  as defined by the interventions

$a^*(j)$ : value of treatment under no intervention during period  $j$

$D(j)$ : indicator for diabetes before the end of period  $j$  (1:yes, 0: no)

$N(j)$ : indicator for death before the end of period  $j$  (1:yes, 0: no)

$C(j)$ : indicator for censoring due to loss to follow-up before the end of period  $j$  (1:yes, 0: no)

$L(j)$ : vector of measured time-varying covariates during period  $j$ ;  $L(0)$  also includes fixed baseline covariates

The g-formula used to estimate the cumulative risk under is shown below.  $f$  indicates the density function and  $f^d$  indicates the density function under a particular intervention  $d$ . For a more detailed explanation of the quantities see the Appendix in Taubman et al.<sup>1</sup>

$$\sum_{k=0}^K \sum_{\bar{a}_K} \sum_{\bar{a}_k^*} \sum_{\bar{l}_K} \Pr[D(k+1) = 1 | \bar{a}(k), \bar{l}(k), \bar{D}(k) = \bar{N}(k+1) = \bar{C}(k) = 0]$$

$$\Pr[N(k+1) = 0 | \bar{a}(k), \bar{l}(k), \bar{D}(k) = \bar{N}(k) = \bar{C}(k) = 0]$$

$$\prod_{j=0}^K \Pr[D(j) = 0 | \bar{a}(j-1), \bar{l}(j-1), N(j) = 0, \bar{D}(j-1) = \bar{C}(j-1) = 0]$$

$$\Pr[N(j) = 0 | \bar{a}(j-1), \bar{l}(j-1), \bar{D}(j-1) = \bar{N}(j-1) = \bar{C}(j-1) = 0]$$

$$f^d(a(j) | a^*(j), \bar{a}(j-1), \bar{l}(j), \bar{D}(j) = \bar{N}(j) = \bar{C}(j) = 0)$$

$$f(a^*(j) | \bar{a}(j-1), \bar{l}(j), \bar{D}(j) = \bar{N}(j) = \bar{C}(j) = 0)$$

$$f(l(j) | \bar{a}(j-1), \bar{l}(j-1), \bar{D}(j) = \bar{N}(j) = \bar{C}(j) = 0)$$

**eTable 1:** Covariates used to model incidence of type 2 diabetes in the Nurses' Health Study 1984-2008

| <b>Variable name (code name)</b>                                      | <b>Years assessed</b>            | <b>As dependent</b>                   | <b>As independent</b>            |
|-----------------------------------------------------------------------|----------------------------------|---------------------------------------|----------------------------------|
| <b>Not modifiable</b>                                                 |                                  |                                       |                                  |
| Baseline age (baseage)                                                | 1984                             | Not predicted                         | Continuous and quadratic         |
| Period/Calendar yr (period)                                           | -                                | Not predicted                         | 11 categories                    |
| History of type 2 diabetes in first degree relatives (fhx)            | 1982                             | Not predicted                         | 2 categories                     |
| Employment (employed)                                                 | 1982                             | Not predicted                         | 8 categories <sup>a</sup>        |
| Marital status (mar80)                                                | 1980                             | Not predicted                         | 2 categories                     |
| College education (college)                                           | 1992                             | Not predicted                         | 2 categories <sup>b</sup>        |
| Husband's education (hhighsch, hcollege, hgradsch, heducmiss)         | 1992                             | Not predicted                         | 4 categories <sup>b,c</sup>      |
| High stress in daily life or work (stress82)                          | 1982                             | Not predicted                         | 2 categories <sup>b</sup>        |
| Smoking prior to 1980 (smkhx)                                         | -                                | Not predicted                         | 2 categories                     |
| OCP use prior to 1980 (ochx)                                          | -                                | Not predicted                         | 2 categories                     |
| Body mass index at age 18 (lbmi18)                                    | -                                | Not predicted                         | 5 categories <sup>d</sup>        |
| Baseline smoking                                                      | 1982                             | Not predicted                         | 5 categories <sup>e</sup>        |
| Baseline physical activity (act82)                                    | 1982                             | Not predicted                         | 6 categories <sup>f</sup>        |
| Baseline food items (rpmeats82, whgrn82, coff82, soda82) <sup>g</sup> | 1980                             | Not predicted                         | Quintile indicators              |
| Baseline alcohol use (alc82)                                          | 1980                             | Not predicted                         | 4 categories <sup>h</sup>        |
| Baseline body mass index (bmi82)                                      | 1982                             | Not predicted                         | 6 categories <sup>i</sup>        |
| <b>Directly modifiable</b>                                            |                                  |                                       |                                  |
| Multivitamin use (mvi)                                                | All periods                      | Logistic <sup>j</sup>                 | 2 categories                     |
| Aspirin use (asn)                                                     | 1984, 88-on                      | Nested Logistic                       | 3 categories <sup>k</sup>        |
| Statins (cig)                                                         | 1988, 94-on                      | Logistic <sup>j</sup>                 | 2 categories                     |
| Post-menopausal hormones (pmh)                                        | All periods                      | Logistic <sup>j</sup>                 | 2 categories                     |
| Smoking (cig)                                                         | All periods                      | Logistic then log-linear <sup>l</sup> | 5 categories <sup>e</sup>        |
| Physical activity (act)                                               | 1986, 88, 92-on                  | Linear <sup>m</sup>                   | 6 categories <sup>f,n</sup>      |
| Food items (rpmeats, whgrn, coff, soda) <sup>g</sup>                  | 1984, 86, 90, 94, 98, 2002, 2006 | Logistic then log-linear <sup>l</sup> | Quintile indicators <sup>n</sup> |
| Total calories (cal)                                                  | 1984, 86, 90, 94, 98, 2002, 2006 | Linear                                | Quintile indicators              |
| Alcohol use (alc)                                                     | 1984, 86, 90, 94, 98, 2002, 2006 | Logistic then log-linear <sup>l</sup> | 4 categories <sup>h,n</sup>      |
| <b>Indirectly modifiable</b>                                          |                                  |                                       |                                  |
| Body mass index (bmi)                                                 | All periods                      | Log-linear <sup>m</sup>               | 6 categories <sup>i</sup>        |
| High blood pressure (hbp)                                             | All periods                      | Logistic to failure <sup>o</sup>      | 2 categories                     |
| High serum cholesterol (chl)                                          | All periods                      | Logistic to failure <sup>o</sup>      | 2 categories                     |
| Myocardial infarction (mi)                                            | All periods                      | Logistic to failure <sup>o</sup>      | 2 categories                     |
| Stroke (str)                                                          | All periods                      | Logistic to failure <sup>o</sup>      | 2 categories                     |
| Angina or coronary artery bypass grafts (angcbg) <sup>p</sup>         | All periods                      | Logistic to failure <sup>o</sup>      | 2 categories                     |

|                              |             |                                  |              |
|------------------------------|-------------|----------------------------------|--------------|
| Cancer (can)                 | All periods | Logistic to failure <sup>o</sup> | 2 categories |
| Menopause (mnp) <sup>q</sup> | All periods | Logistic to failure <sup>o</sup> | 2 categories |
| Osteoporosis (ost)           | All periods | Logistic to failure <sup>o</sup> | 2 categories |

<sup>a</sup> Categories were: employed as room nurse, employed as in-patient nurse, employed as out-patient nurse, employed in nursing education, employed as operating room nurse, employed as other nursing, employed as non-nursing, homemaker.

<sup>b</sup> A missing indicator was used for observations with missing values.

<sup>c</sup> Categories were: less than high school, high school, college, graduate school.

<sup>d</sup> Categories were: < 18.2, 18.3 - 22.1, 22.3-24.9, 25-29.9,  $\geq 30$  kg/m<sup>2</sup>.

<sup>e</sup> Categories were: nonsmokers, <1, 1 -4, 5-14, 15-29 and  $\geq 30$  cigarettes/day.

<sup>f</sup> Categories were: <0.5, 0.5-1.49, 1.5-2.49, 2.5-3.49, 3.5- 4.49,  $\geq 4.5$  hours/week .

<sup>g</sup> These include red or processed meat, coffee, soda and whole grain. Categories were: for red or processed meat: 0-0.36, 0.37-0.60, 0.61-0.88, 0.89-1.34,  $\geq 1.35$  servings/day; for coffee: 0-0.06, 0.07-0.49, 0.5-0.99, 1-2.50,  $\geq 2.51$  cups/day; for soda: 0-0.06, 0.07-0.27, 0.28-0.70, 0.71-1.20,  $\geq 1.21$  servings/day; and for whole grain: 0-0.49, 0.5-1.06, 1.07-1.63, 1.64-2.57,  $\geq 2.58$  servings/day. We had to combine the last two categories of coffee intake and the last three categories of whole grain intake in the year 1980 due to small numbers. Soda intake was not comprehensively assessed in 1986, therefore, we used the data on soda intake from 1984 for this year.

<sup>h</sup> Categories were: nondrinkers, <1, 1-4.9, 5-9.9,  $\geq 10$  grams/day.

<sup>i</sup> Categories were: < 18.2, 18.3 - 22.1, 22.3-24.9, 25-29.9, 30-34.8,  $\geq 34.9$  kg/m<sup>2</sup>.

<sup>j</sup> The variables predicted by logistic models were assigned a value of one if the predicted probability was greater than a random number from a uniform distribution.

<sup>k</sup> Categories were: no use, less than daily use, daily use or more.

<sup>l</sup> Covariates of outcome type 4 are predicted using two stages, first a logistic regression on an indicator of whether the variable is nonzero and then a linear regression of the log of the nonzero values.

<sup>m</sup> The variables predicted by a linear model were assigned a value equal to the predicted value plus the standard error multiplied by a random number from a normal (0,1) distribution. Simulated values of continuous risk factors were truncated so that they did not fall outside of the observed range.

<sup>n</sup> Because diet, exercise and alcohol use was ascertained every 4 years during most of the follow-up we included both a main term and a product term between the value of the risk factor and the time since last measurement.

<sup>o</sup> For these variables, the value was predicted based on a logistic regression only if the predicted probability for the prior period was 0.

<sup>p</sup> In some subgroup analyses, we had to combine 2 or 3 variables into one variable to prevent convergence problems due to sparse data. For example, in the subgroup with family history of diabetes at baseline, which included 15802 nurses, we combined history of coronary artery bypass grafts, stroke and myocardial infarction into a single variable.

<sup>q</sup> The probability of menopause was set to 1.0 in 2004 and 2006 or if age was  $\geq 60$  years.

**eFigure 1:** Flowchart of participant selection

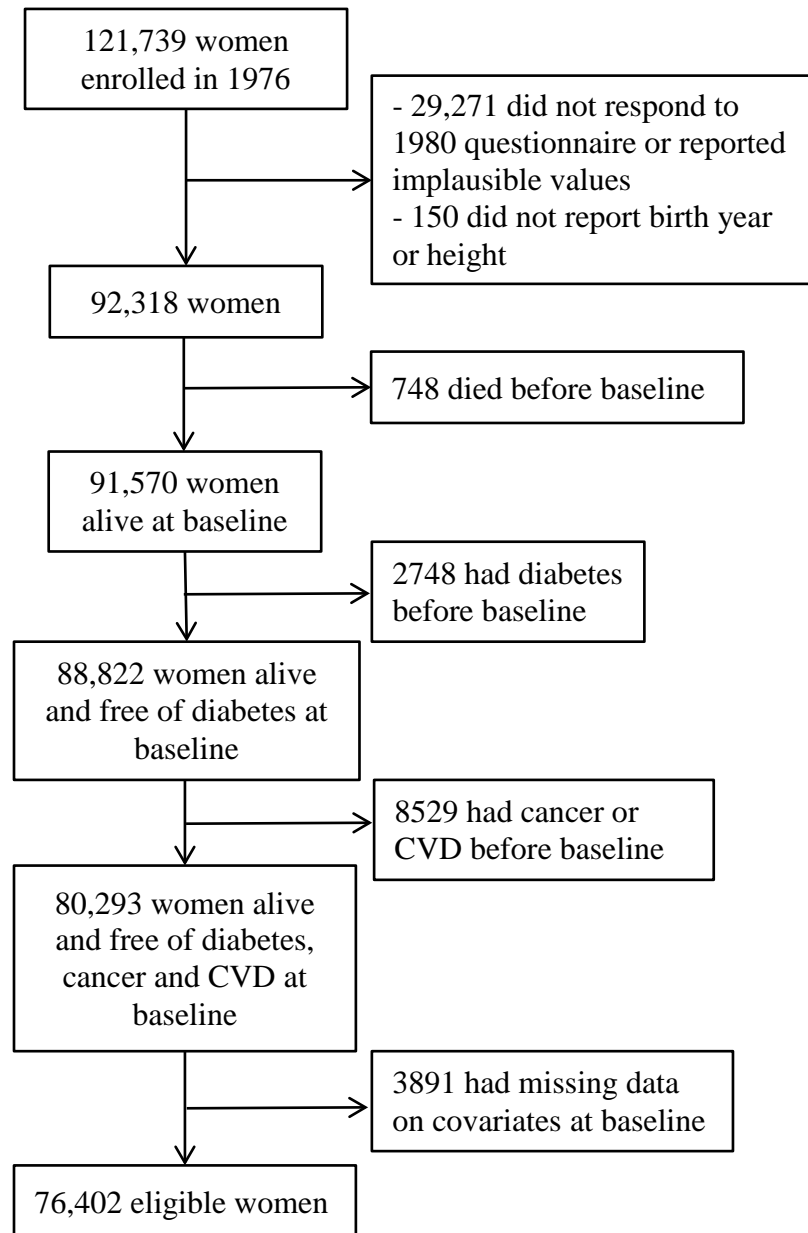

**eFigure 2:** Mean difference between observed and simulated values for the number of cigarettes smoked per day and their 95% confidence intervals by year of follow-up

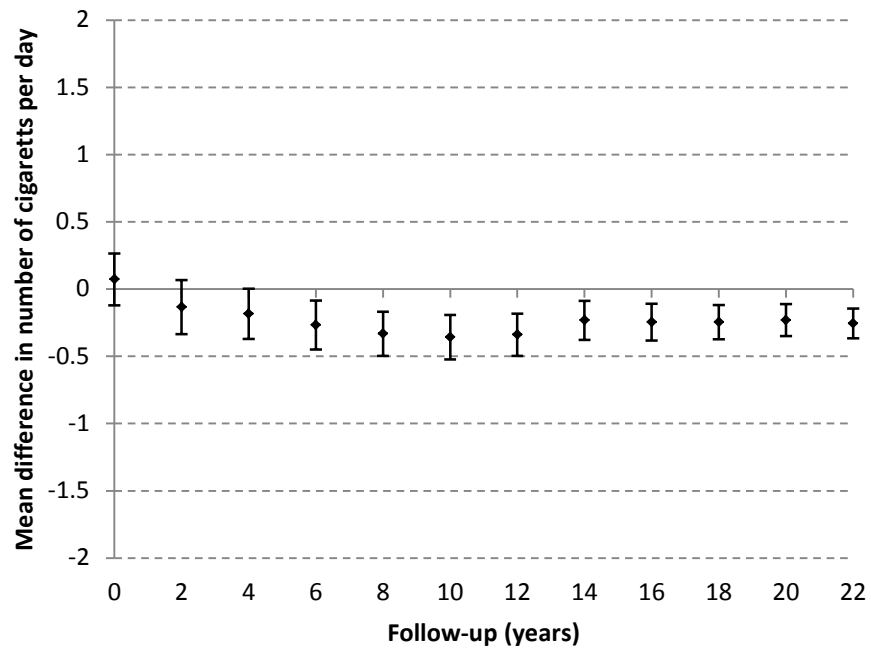

**eFigure 3:** Mean difference between observed and simulated values for physical activity and their 95% confidence intervals by year of follow-up

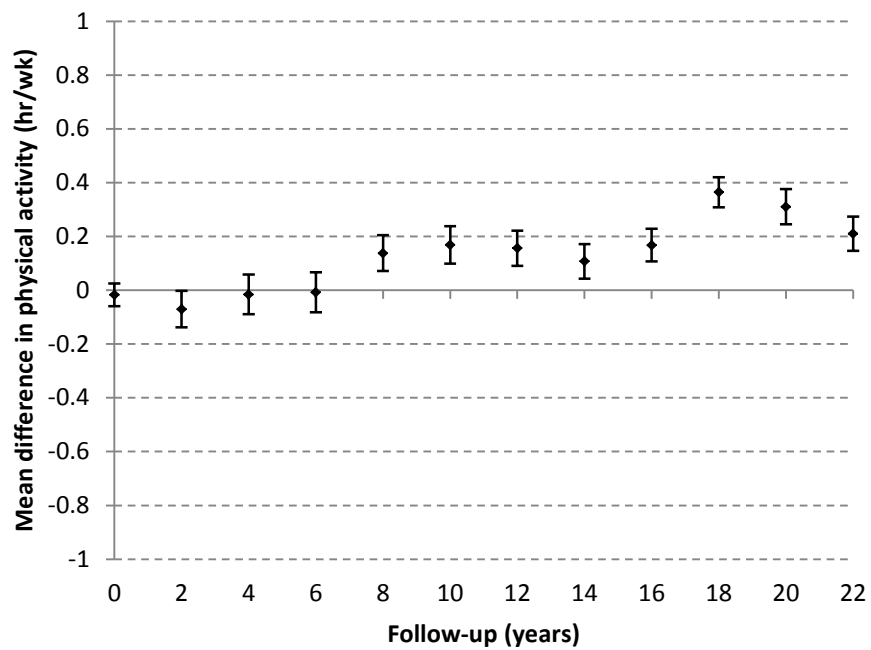

**eFigure 4:** Ratio of observed to simulated values of body mass index and their 95% confidence intervals by year of follow-up

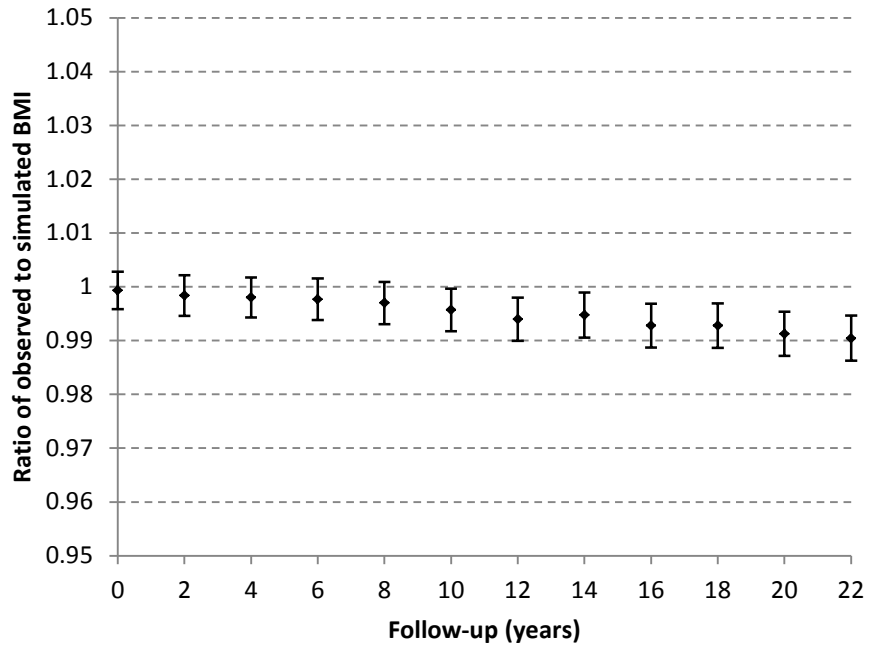

**eFigure 5:** Mean difference between observed and simulated values for intake of red meat and their 95% confidence intervals by year of follow-up

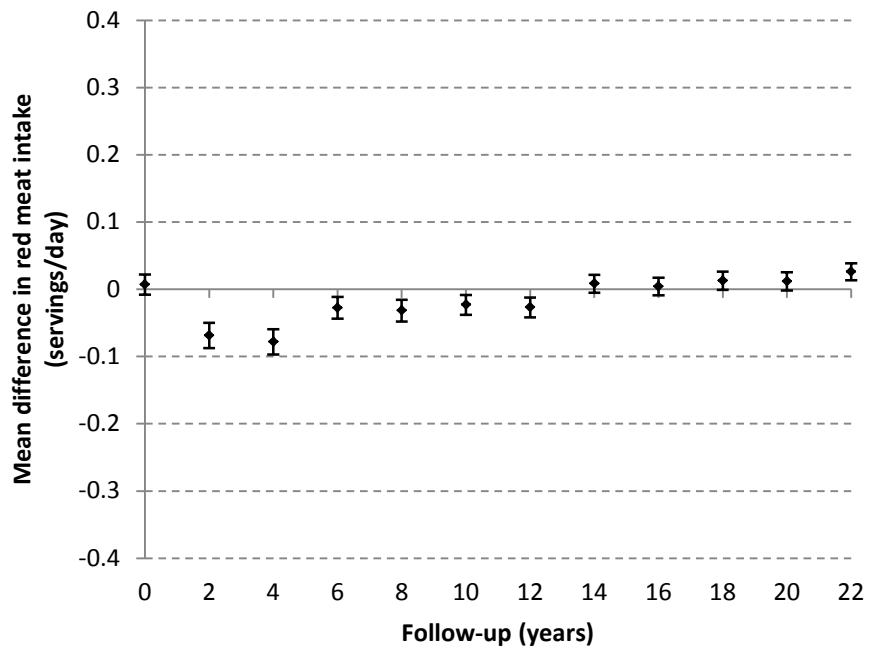

**eFigure 6:** Mean difference between observed and simulated values for intake of coffee and their 95% confidence intervals by year of follow-up

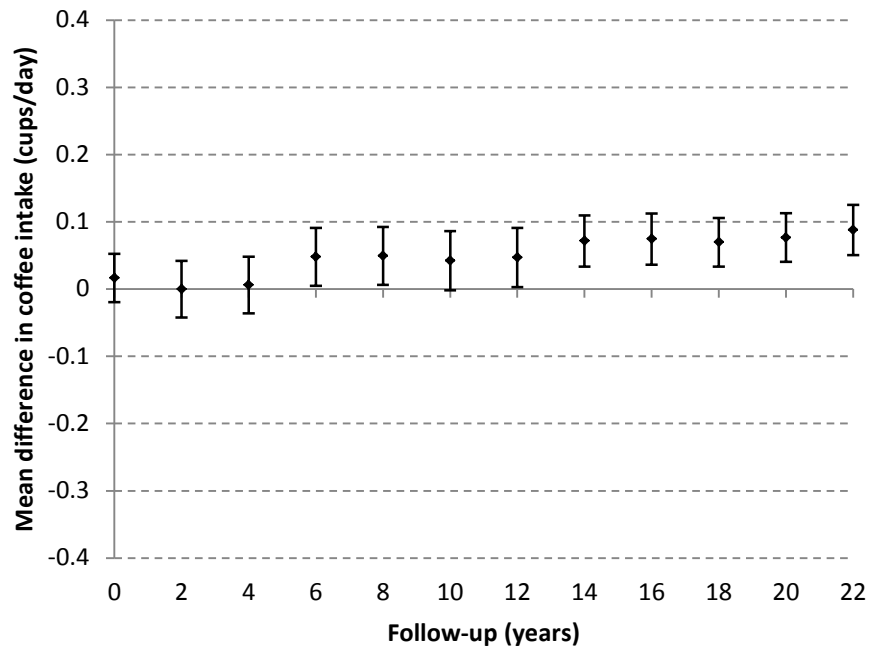

**eFigure 7:** Mean difference between observed and simulated values for intake of whole grain and their 95% confidence intervals by year of follow-up

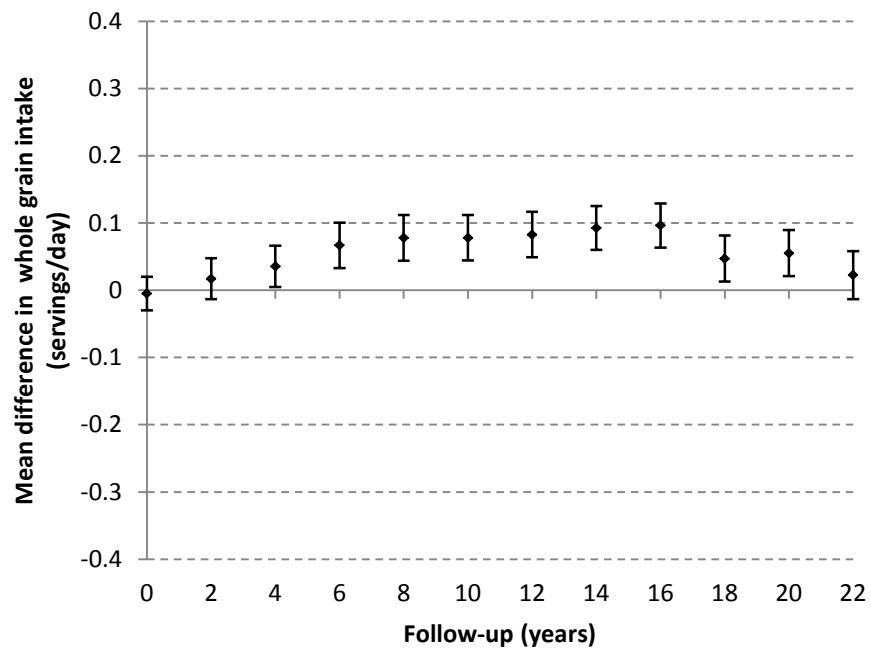

**eFigure 8:** Mean difference between observed and simulated values for intake of soda and their 95% confidence intervals by year of follow-up

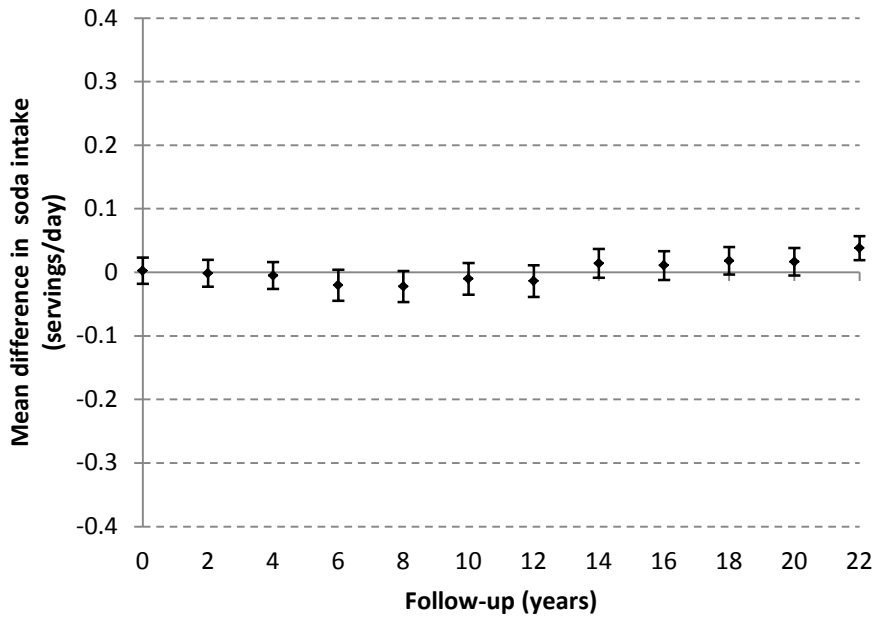

**eFigure 9:** Mean difference between observed and simulated values for intake of alcohol and their 95% confidence intervals by year of follow-up

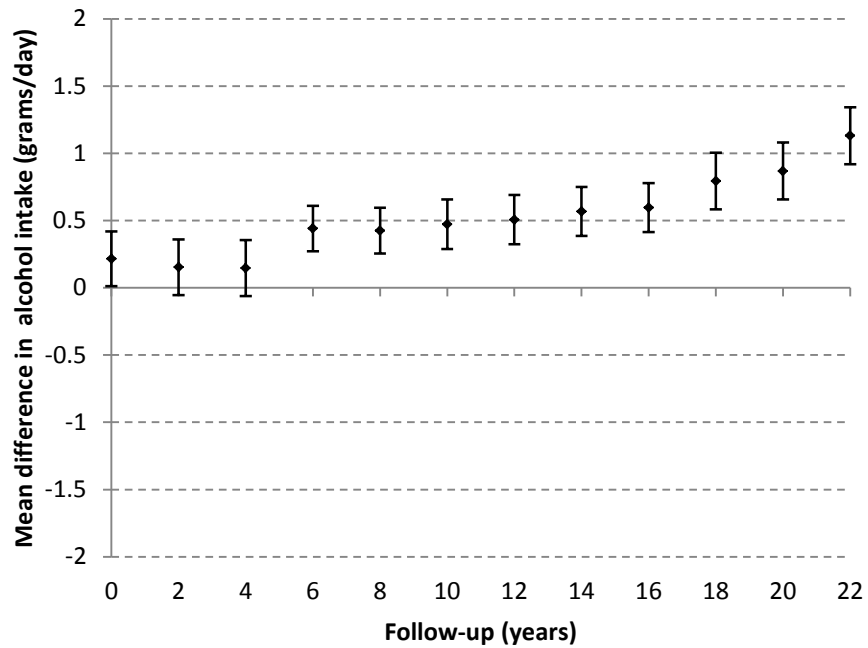



**eTable 2:** Coefficients of regressions used in the simulations <sup>a, b, c</sup>

<sup>a</sup> For the list of code names see Table S1.

<sup>b</sup> The suffixes in the variable names are as follows: the numerical suffixes indicate the categories of the values of the covariates as explained in the footnotes of Table S1; *sq* means squared term for a continuous variable; *l1* indicates the value lagged for one period (i.e. 2 years); *l2* indicates a value lagged for 2 periods (i.e. 4 years); *ti* indicates the product term between the value of the variable and the time passed since the last measurement when values were carried forward.

<sup>c</sup> The prefix *l* indicates the natural log of the value of the variable.

(A) Logistic model to estimate the probability of diabetes

| <b>Parameter</b>     | <b>Log odds ratio</b> | <b>Standard error</b> | <b>Wald chi-square</b> | <b>P value</b> |
|----------------------|-----------------------|-----------------------|------------------------|----------------|
| <b>Intercept</b>     | -4.8653               | 0.7578                | 41.2160                | <.0001         |
| <b>fhx</b>           | 0.6429                | 0.0283                | 515.5123               | <.0001         |
| <b>smkhx</b>         | 0.0968                | 0.0321                | 9.1083                 | 0.0025         |
| <b>ochx</b>          | 0.0831                | 0.0289                | 8.2542                 | 0.0041         |
| <b>employed_1</b>    | 0.0102                | 0.0554                | 0.0342                 | 0.8532         |
| <b>employed_2</b>    | -0.0675               | 0.0891                | 0.5734                 | 0.4489         |
| <b>employed_3</b>    | -0.00619              | 0.0432                | 0.0206                 | 0.8859         |
| <b>employed_4</b>    | -0.0267               | 0.0585                | 0.2078                 | 0.6485         |
| <b>employed_5</b>    | 0.0467                | 0.0407                | 1.3139                 | 0.2517         |
| <b>employed_6</b>    | 0.0239                | 0.0627                | 0.1459                 | 0.7025         |
| <b>employed_miss</b> | 0.1840                | 0.1919                | 0.9188                 | 0.3378         |
| <b>mar80</b>         | -0.0283               | 0.0492                | 0.3297                 | 0.5658         |
| <b>college</b>       | -0.0550               | 0.0325                | 2.8653                 | 0.0905         |
| <b>college_miss</b>  | 0.2518                | 0.2299                | 1.1995                 | 0.2734         |
| <b>stress82</b>      | 0.0292                | 0.0341                | 0.7355                 | 0.3911         |
| <b>stress82_miss</b> | 0.0316                | 0.1791                | 0.0312                 | 0.8597         |
| <b>hhighsch</b>      | -0.0949               | 0.0361                | 6.8998                 | 0.0086         |
| <b>hcollege</b>      | -0.0514               | 0.0415                | 1.5307                 | 0.2160         |
| <b>hgradsch</b>      | -0.0991               | 0.0464                | 4.5592                 | 0.0327         |
| <b>heduc_miss</b>    | 0.0842                | 0.1526                | 0.3048                 | 0.5809         |
| <b>lbmi18_2</b>      | -0.2993               | 0.0325                | 84.5748                | <.0001         |

|                    |          |          |         |        |
|--------------------|----------|----------|---------|--------|
| <b>lbmi18_3</b>    | -0.3984  | 0.0442   | 81.0597 | <.0001 |
| <b>lbmi18_4</b>    | -0.5326  | 0.0869   | 37.5317 | <.0001 |
| <b>baseage</b>     | 0.0421   | 0.0296   | 2.0257  | 0.1547 |
| <b>baseage_sq</b>  | -0.00033 | 0.000291 | 1.3046  | 0.2534 |
| <b>bmi80_1</b>     | -0.7819  | 0.3311   | 5.5745  | 0.0182 |
| <b>bmi80_2</b>     | -0.7437  | 0.0868   | 73.3367 | <.0001 |
| <b>bmi80_3</b>     | -0.5727  | 0.0706   | 65.7820 | <.0001 |
| <b>bmi80_4</b>     | -0.3363  | 0.0596   | 31.8716 | <.0001 |
| <b>bmi80_5</b>     | -0.1911  | 0.0541   | 12.4878 | 0.0004 |
| <b>act80_1</b>     | -0.0868  | 0.0385   | 5.0858  | 0.0241 |
| <b>act80_2</b>     | -0.0200  | 0.0456   | 0.1917  | 0.6615 |
| <b>act80_3</b>     | 0.0233   | 0.0406   | 0.3276  | 0.5671 |
| <b>alc80_1</b>     | 0.1040   | 0.0478   | 4.7377  | 0.0295 |
| <b>alc80_2</b>     | 0.0488   | 0.0477   | 1.0437  | 0.3070 |
| <b>alc80_3</b>     | 0.0573   | 0.0561   | 1.0435  | 0.3070 |
| <b>rpmeats80_1</b> | 0.0201   | 0.0874   | 0.0527  | 0.8184 |
| <b>rpmeats80_2</b> | -0.0197  | 0.0515   | 0.1464  | 0.7020 |
| <b>rpmeats80_3</b> | 0.00198  | 0.0420   | 0.0022  | 0.9624 |
| <b>rpmeats80_4</b> | -0.0207  | 0.0373   | 0.3074  | 0.5793 |
| <b>coff80_1</b>    | -0.0612  | 0.0383   | 2.5613  | 0.1095 |
| <b>coff80_2</b>    | -0.0203  | 0.0558   | 0.1322  | 0.7162 |
| <b>coff80_3</b>    | -0.0355  | 0.0832   | 0.1822  | 0.6695 |
| <b>whgrn80_1</b>   | 0.1204   | 0.0409   | 8.6433  | 0.0033 |
| <b>whgrn80_2</b>   | 0.0771   | 0.0443   | 3.0331  | 0.0816 |
| <b>soda80_1</b>    | -0.1866  | 0.0528   | 12.4859 | 0.0004 |
| <b>soda80_2</b>    | -0.1561  | 0.0429   | 13.2549 | 0.0003 |
| <b>soda80_3</b>    | -0.0839  | 0.0406   | 4.2633  | 0.0389 |
| <b>soda80_4</b>    | -0.0442  | 0.0376   | 1.3843  | 0.2394 |
| <b>cig80_1</b>     | -0.1842  | 0.0936   | 3.8751  | 0.0490 |
| <b>cig80_2</b>     | -0.2762  | 0.1325   | 4.3489  | 0.0370 |
| <b>cig80_3</b>     | -0.0404  | 0.1053   | 0.1473  | 0.7011 |
| <b>cig80_4</b>     | 0.0419   | 0.0908   | 0.2124  | 0.6449 |

|                     |          |        |         |        |
|---------------------|----------|--------|---------|--------|
| <b>period_1</b>     | 0.1418   | 0.1396 | 1.0317  | 0.3098 |
| <b>period_2</b>     | 0.0497   | 0.0952 | 0.2731  | 0.6013 |
| <b>period_3</b>     | 0.00746  | 0.1628 | 0.0021  | 0.9635 |
| <b>period_4</b>     | 0.2323   | 0.1359 | 2.9223  | 0.0874 |
| <b>period_5</b>     | 0.1519   | 0.1481 | 1.0517  | 0.3051 |
| <b>period_6</b>     | 0.2360   | 0.0733 | 10.3649 | 0.0013 |
| <b>period_7</b>     | 0.2891   | 0.1457 | 3.9380  | 0.0472 |
| <b>period_8</b>     | 0.5159   | 0.0668 | 59.7184 | <.0001 |
| <b>period_9</b>     | 0.5239   | 0.1452 | 13.0263 | 0.0003 |
| <b>period_10</b>    | 0.4342   | 0.0647 | 45.0929 | <.0001 |
| <b>period_11</b>    | 0.4229   | 0.1445 | 8.5648  | 0.0034 |
| <b>mnp_11</b>       | 0.0955   | 0.0694 | 1.8903  | 0.1692 |
| <b>mnp</b>          | 0.1660   | 0.0764 | 4.7185  | 0.0298 |
| <b>pmh_11</b>       | 0.0582   | 0.0430 | 1.8333  | 0.1757 |
| <b>pmh</b>          | -0.3305  | 0.0446 | 54.7878 | <.0001 |
| <b>ost_11</b>       | -0.0763  | 0.0835 | 0.8340  | 0.3611 |
| <b>ost</b>          | -0.0544  | 0.0765 | 0.5051  | 0.4772 |
| <b>rpmeats_1</b>    | -0.3894  | 0.0678 | 33.0113 | <.0001 |
| <b>rpmeats_1_ti</b> | 0.0306   | 0.0493 | 0.3841  | 0.5354 |
| <b>rpmeats_2</b>    | -0.2486  | 0.0601 | 17.1156 | <.0001 |
| <b>rpmeats_2_ti</b> | -0.0121  | 0.0448 | 0.0728  | 0.7873 |
| <b>rpmeats_3</b>    | -0.2933  | 0.0589 | 24.8312 | <.0001 |
| <b>rpmeats_3_ti</b> | 0.0772   | 0.0432 | 3.1971  | 0.0738 |
| <b>rpmeats_4</b>    | -0.1463  | 0.0546 | 7.1910  | 0.0073 |
| <b>rpmeats_4_ti</b> | -0.00168 | 0.0411 | 0.0017  | 0.9674 |
| <b>coff_1</b>       | 0.3026   | 0.0675 | 20.1288 | <.0001 |
| <b>coff_1_ti</b>    | -0.00632 | 0.0453 | 0.0195  | 0.8891 |
| <b>coff_2</b>       | 0.4293   | 0.0697 | 37.9217 | <.0001 |
| <b>coff_2_ti</b>    | -0.0594  | 0.0510 | 1.3541  | 0.2446 |
| <b>coff_3</b>       | 0.3789   | 0.0825 | 21.0983 | <.0001 |
| <b>coff_3_ti</b>    | -0.1044  | 0.0626 | 2.7775  | 0.0956 |
| <b>coff_4</b>       | 0.3008   | 0.0489 | 37.8553 | <.0001 |

|                   |          |        |         |        |
|-------------------|----------|--------|---------|--------|
| <b>coff_4_ti</b>  | -0.0421  | 0.0357 | 1.3915  | 0.2382 |
| <b>whgrn_1</b>    | -0.0497  | 0.0619 | 0.6435  | 0.4224 |
| <b>whgrn_1_ti</b> | 0.00925  | 0.0462 | 0.0400  | 0.8414 |
| <b>whgrn_2</b>    | -0.0349  | 0.0586 | 0.3551  | 0.5512 |
| <b>whgrn_2_ti</b> | 0.0704   | 0.0434 | 2.6280  | 0.1050 |
| <b>whgrn_3</b>    | -0.0264  | 0.0573 | 0.2115  | 0.6456 |
| <b>whgrn_3_ti</b> | 0.0706   | 0.0425 | 2.7638  | 0.0964 |
| <b>whgrn_4</b>    | -0.0576  | 0.0570 | 1.0220  | 0.3120 |
| <b>whgrn_4_ti</b> | 0.0739   | 0.0424 | 3.0453  | 0.0810 |
| <b>soda_1</b>     | -0.0502  | 0.0697 | 0.5180  | 0.4717 |
| <b>soda_1_ti</b>  | -0.0187  | 0.0428 | 0.1905  | 0.6625 |
| <b>soda_2</b>     | -0.0663  | 0.0559 | 1.4082  | 0.2354 |
| <b>soda_2_ti</b>  | 0.0345   | 0.0322 | 1.1503  | 0.2835 |
| <b>soda_3</b>     | -0.1042  | 0.0549 | 3.6034  | 0.0577 |
| <b>soda_3_ti</b>  | 0.0433   | 0.0316 | 1.8756  | 0.1708 |
| <b>soda_4</b>     | -0.1132  | 0.0540 | 4.3919  | 0.0361 |
| <b>soda_4_ti</b>  | 0.0104   | 0.0319 | 0.1071  | 0.7435 |
| <b>cal_1</b>      | 0.00774  | 0.0661 | 0.0137  | 0.9067 |
| <b>cal_1_ti</b>   | -0.0456  | 0.0491 | 0.8650  | 0.3524 |
| <b>cal_2</b>      | -0.0344  | 0.0613 | 0.3150  | 0.5747 |
| <b>cal_2_ti</b>   | -0.0477  | 0.0454 | 1.1039  | 0.2934 |
| <b>cal_3</b>      | -0.0235  | 0.0583 | 0.1625  | 0.6869 |
| <b>cal_3_ti</b>   | -0.0306  | 0.0431 | 0.5058  | 0.4770 |
| <b>cal_4</b>      | -0.00922 | 0.0558 | 0.0273  | 0.8687 |
| <b>cal_4_ti</b>   | -0.0504  | 0.0415 | 1.4786  | 0.2240 |
| <b>alc_1</b>      | 0.4295   | 0.0676 | 40.3247 | <.0001 |
| <b>alc_1_ti</b>   | 0.000419 | 0.0446 | 0.0001  | 0.9925 |
| <b>alc_2</b>      | 0.3351   | 0.0693 | 23.4018 | <.0001 |
| <b>alc_2_ti</b>   | -0.0425  | 0.0488 | 0.7598  | 0.3834 |
| <b>alc_3</b>      | 0.1386   | 0.0872 | 2.5225  | 0.1122 |
| <b>alc_3_ti</b>   | -0.0187  | 0.0645 | 0.0842  | 0.7716 |
| <b>cig_ll_1</b>   | -0.6010  | 0.1651 | 13.2537 | 0.0003 |

|                 |          |        |          |        |
|-----------------|----------|--------|----------|--------|
| <b>cig_1</b>    | -0.0946  | 0.1632 | 0.3358   | 0.5623 |
| <b>cig_11_2</b> | -0.3275  | 0.2053 | 2.5443   | 0.1107 |
| <b>cig_2</b>    | -0.2412  | 0.2076 | 1.3497   | 0.2453 |
| <b>cig_11_3</b> | -0.2644  | 0.1743 | 2.3025   | 0.1292 |
| <b>cig_3</b>    | -0.4088  | 0.1753 | 5.4379   | 0.0197 |
| <b>cig_11_4</b> | -0.0863  | 0.1504 | 0.3293   | 0.5661 |
| <b>cig_4</b>    | -0.4950  | 0.1530 | 10.4736  | 0.0012 |
| <b>mvi_11</b>   | -0.00846 | 0.0319 | 0.0705   | 0.7906 |
| <b>mvi</b>      | -0.0434  | 0.0321 | 1.8290   | 0.1762 |
| <b>act_1</b>    | 0.2310   | 0.0556 | 17.2664  | <.0001 |
| <b>act_1_ti</b> | -0.0860  | 0.0632 | 1.8530   | 0.1734 |
| <b>act_2</b>    | 0.1259   | 0.0628 | 4.0209   | 0.0449 |
| <b>act_2_ti</b> | -0.1312  | 0.0772 | 2.8919   | 0.0890 |
| <b>act_3</b>    | 0.1421   | 0.1103 | 1.6611   | 0.1975 |
| <b>act_3_ti</b> | 0.0961   | 0.1365 | 0.4959   | 0.4813 |
| <b>act_4</b>    | 0.0843   | 0.0726 | 1.3483   | 0.2456 |
| <b>act_4_ti</b> | -0.0358  | 0.0771 | 0.2155   | 0.6425 |
| <b>act_5</b>    | -0.0877  | 0.1344 | 0.4261   | 0.5139 |
| <b>act_5_ti</b> | 0.0589   | 0.1886 | 0.0977   | 0.7546 |
| <b>can_11</b>   | 0.0520   | 0.1070 | 0.2363   | 0.6269 |
| <b>can</b>      | -0.0273  | 0.0969 | 0.0797   | 0.7777 |
| <b>bmi_11_1</b> | -1.3832  | 0.4897 | 7.9789   | 0.0047 |
| <b>bmi_1</b>    | -1.8099  | 0.4503 | 16.1572  | <.0001 |
| <b>bmi_11_2</b> | -1.0888  | 0.1395 | 60.8995  | <.0001 |
| <b>bmi_2</b>    | -1.4694  | 0.1367 | 115.5352 | <.0001 |
| <b>bmi_11_3</b> | -0.8680  | 0.0956 | 82.4978  | <.0001 |
| <b>bmi_3</b>    | -1.0745  | 0.0926 | 134.5778 | <.0001 |
| <b>bmi_11_4</b> | -0.4696  | 0.0714 | 43.2896  | <.0001 |
| <b>bmi_4</b>    | -0.6542  | 0.0686 | 90.9264  | <.0001 |
| <b>bmi_11_5</b> | -0.2053  | 0.0557 | 13.6101  | 0.0002 |
| <b>bmi_5</b>    | -0.2332  | 0.0537 | 18.8710  | <.0001 |
| <b>chl_11</b>   | 0.0809   | 0.0604 | 1.7909   | 0.1808 |

|                  |         |        |         |        |
|------------------|---------|--------|---------|--------|
| <b>chl</b>       | 0.0658  | 0.0606 | 1.1805  | 0.2773 |
| <b>hbp_l1</b>    | 0.1775  | 0.0609 | 8.5021  | 0.0035 |
| <b>hbp</b>       | 0.4529  | 0.0629 | 51.7932 | <.0001 |
| <b>sta</b>       | 0.3480  | 0.0378 | 84.6670 | <.0001 |
| <b>sta_ti</b>    | -0.0873 | 0.0706 | 1.5273  | 0.2165 |
| <b>asn_l1_1</b>  | 0.0603  | 0.0421 | 2.0441  | 0.1528 |
| <b>asn_1</b>     | -0.0958 | 0.0408 | 5.5253  | 0.0187 |
| <b>asn_l1_2</b>  | 0.0107  | 0.0417 | 0.0653  | 0.7983 |
| <b>asn_2</b>     | -0.0741 | 0.0412 | 3.2375  | 0.0720 |
| <b>angcbg_l1</b> | 0.2123  | 0.1398 | 2.3067  | 0.1288 |
| <b>angcbg</b>    | -0.0525 | 0.1313 | 0.1597  | 0.6895 |
| <b>str_l1</b>    | -0.2333 | 0.2426 | 0.9251  | 0.3361 |
| <b>str</b>       | 0.4046  | 0.2034 | 3.9581  | 0.0466 |
| <b>mi_l1</b>     | -0.0396 | 0.2604 | 0.0232  | 0.8790 |
| <b>mi</b>        | 0.2597  | 0.2347 | 1.2251  | 0.2684 |

(B) Logistic model to estimate the probability of death

| <b>Parameter</b>     | <b>Log odds ratio</b> | <b>Standard error</b> | <b>Wald chi-square</b> | <b>P value</b> |
|----------------------|-----------------------|-----------------------|------------------------|----------------|
| <b>Intercept</b>     | -9.4383               | 0.7788                | 146.8900               | <.0001         |
| <b>flx</b>           | -0.0225               | 0.0297                | 0.5749                 | 0.4483         |
| <b>smkhx</b>         | 0.2122                | 0.0304                | 48.5678                | <.0001         |
| <b>ochx</b>          | -0.0162               | 0.0258                | 0.3957                 | 0.5293         |
| <b>employed_1</b>    | -0.0403               | 0.0459                | 0.7723                 | 0.3795         |
| <b>employed_2</b>    | -0.1120               | 0.0803                | 1.9477                 | 0.1628         |
| <b>employed_3</b>    | -0.0992               | 0.0375                | 7.0187                 | 0.0081         |
| <b>employed_4</b>    | -0.0986               | 0.0525                | 3.5222                 | 0.0606         |
| <b>employed_5</b>    | -0.0401               | 0.0334                | 1.4478                 | 0.2289         |
| <b>employed_6</b>    | -0.0768               | 0.0511                | 2.2614                 | 0.1326         |
| <b>employed_miss</b> | -0.3379               | 0.1561                | 4.6829                 | 0.0305         |
| <b>mar80</b>         | 0.0456                | 0.0396                | 1.3213                 | 0.2504         |

|                      |          |          |          |        |
|----------------------|----------|----------|----------|--------|
| <b>college</b>       | -0.1489  | 0.0300   | 24.6332  | <.0001 |
| <b>college_miss</b>  | 16.2453  | 159.1    | 0.0104   | 0.9187 |
| <b>stress82</b>      | 0.0140   | 0.0280   | 0.2504   | 0.6168 |
| <b>stress82_miss</b> | 0.1544   | 0.1440   | 1.1489   | 0.2838 |
| <b>hhighsch</b>      | -0.5726  | 0.0299   | 366.0429 | <.0001 |
| <b>hcollege</b>      | -0.5683  | 0.0349   | 265.4183 | <.0001 |
| <b>hgradsch</b>      | -0.5809  | 0.0384   | 229.2367 | <.0001 |
| <b>heduc_miss</b>    | -0.3522  | 178.2    | 0.0000   | 0.9984 |
| <b>lbmi18_2</b>      | 0.0515   | 0.0293   | 3.0989   | 0.0783 |
| <b>lbmi18_3</b>      | 0.2596   | 0.0426   | 37.1544  | <.0001 |
| <b>lbmi18_4</b>      | 0.3735   | 0.0891   | 17.5654  | <.0001 |
| <b>baseage</b>       | 0.1282   | 0.0296   | 18.7424  | <.0001 |
| <b>baseage_sq</b>    | -0.00046 | 0.000280 | 2.6482   | 0.1037 |
| <b>bmi80_1</b>       | -1.2911  | 0.1320   | 95.6447  | <.0001 |
| <b>bmi80_2</b>       | -0.9648  | 0.0941   | 105.2112 | <.0001 |
| <b>bmi80_3</b>       | -0.6902  | 0.0894   | 59.6149  | <.0001 |
| <b>bmi80_4</b>       | -0.4551  | 0.0845   | 28.9743  | <.0001 |
| <b>bmi80_5</b>       | -0.1830  | 0.0821   | 4.9712   | 0.0258 |
| <b>act80_1</b>       | -0.0631  | 0.0322   | 3.8520   | 0.0497 |
| <b>act80_2</b>       | -0.0220  | 0.0392   | 0.3151   | 0.5745 |
| <b>act80_3</b>       | -0.0113  | 0.0343   | 0.1081   | 0.7423 |
| <b>alc80_1</b>       | -0.2546  | 0.0367   | 48.1266  | <.0001 |
| <b>alc80_2</b>       | -0.1941  | 0.0370   | 27.5031  | <.0001 |
| <b>alc80_3</b>       | -0.1492  | 0.0431   | 12.0015  | 0.0005 |
| <b>rpmeats80_1</b>   | -0.0441  | 0.0651   | 0.4597   | 0.4978 |
| <b>rpmeats80_2</b>   | 0.0261   | 0.0399   | 0.4269   | 0.5135 |
| <b>rpmeats80_3</b>   | 0.0107   | 0.0358   | 0.0901   | 0.7640 |
| <b>rpmeats80_4</b>   | 0.0154   | 0.0328   | 0.2196   | 0.6393 |
| <b>coff80_1</b>      | -0.0449  | 0.0333   | 1.8123   | 0.1782 |
| <b>coff80_2</b>      | -0.0559  | 0.0527   | 1.1232   | 0.2892 |
| <b>coff80_3</b>      | -0.1048  | 0.0801   | 1.7125   | 0.1907 |
| <b>whgrn80_1</b>     | -0.0358  | 0.0338   | 1.1171   | 0.2905 |

|                     |          |         |          |        |
|---------------------|----------|---------|----------|--------|
| <b>whgrn80_2</b>    | -0.0170  | 0.0362  | 0.2206   | 0.6386 |
| <b>soda80_1</b>     | 0.0151   | 0.0418  | 0.1308   | 0.7176 |
| <b>soda80_2</b>     | 0.0255   | 0.0390  | 0.4287   | 0.5126 |
| <b>soda80_3</b>     | 0.0117   | 0.0399  | 0.0866   | 0.7685 |
| <b>soda80_4</b>     | -0.00329 | 0.0386  | 0.0072   | 0.9322 |
| <b>cig80_1</b>      | -1.0174  | 0.0635  | 256.6992 | <.0001 |
| <b>cig80_2</b>      | -0.9640  | 0.1019  | 89.4929  | <.0001 |
| <b>cig80_3</b>      | -0.5948  | 0.0727  | 66.9925  | <.0001 |
| <b>cig80_4</b>      | -0.2359  | 0.0593  | 15.8108  | <.0001 |
| <b>period_1</b>     | -15.1839 | 80.1815 | 0.0359   | 0.8498 |
| <b>period_2</b>     | -1.2437  | 0.0869  | 205.0280 | <.0001 |
| <b>period_3</b>     | -0.8697  | 0.1487  | 34.1977  | <.0001 |
| <b>period_4</b>     | -0.7614  | 0.1193  | 40.7205  | <.0001 |
| <b>period_5</b>     | -0.5574  | 0.1265  | 19.4043  | <.0001 |
| <b>period_6</b>     | -0.6675  | 0.0569  | 137.7146 | <.0001 |
| <b>period_7</b>     | -0.1860  | 0.1241  | 2.2472   | 0.1339 |
| <b>period_8</b>     | -0.3781  | 0.0504  | 56.2257  | <.0001 |
| <b>period_9</b>     | -0.0432  | 0.1243  | 0.1206   | 0.7284 |
| <b>period_10</b>    | -0.1966  | 0.0456  | 18.5780  | <.0001 |
| <b>period_11</b>    | 0.2281   | 0.1230  | 3.4387   | 0.0637 |
| <b>mnp_l1</b>       | -0.00584 | 0.0893  | 0.0043   | 0.9479 |
| <b>mnp</b>          | 0.2343   | 0.1028  | 5.1883   | 0.0227 |
| <b>pmh_l1</b>       | 0.1871   | 0.0364  | 26.4755  | <.0001 |
| <b>pmh</b>          | -0.5382  | 0.0410  | 171.9888 | <.0001 |
| <b>ost_l1</b>       | 0.4294   | 0.0661  | 42.1703  | <.0001 |
| <b>ost</b>          | -0.3166  | 0.0640  | 24.4690  | <.0001 |
| <b>rpmeats_1</b>    | -0.1978  | 0.0589  | 11.2614  | 0.0008 |
| <b>rpmeats_1_ti</b> | 0.0227   | 0.0429  | 0.2789   | 0.5974 |
| <b>rpmeats_2</b>    | -0.1786  | 0.0568  | 9.8911   | 0.0017 |
| <b>rpmeats_2_ti</b> | 0.0165   | 0.0418  | 0.1559   | 0.6929 |
| <b>rpmeats_3</b>    | -0.0177  | 0.0556  | 0.1011   | 0.7506 |
| <b>rpmeats_3_ti</b> | -0.0236  | 0.0414  | 0.3241   | 0.5691 |



|                     |          |        |         |        |
|---------------------|----------|--------|---------|--------|
| <b>rpmeats_4</b>    | -0.0445  | 0.0553 | 0.6454  | 0.4218 |
| <b>rpmeats_4_ti</b> | -0.0192  | 0.0413 | 0.2157  | 0.6423 |
| <b>coff_1</b>       | 0.5417   | 0.0567 | 91.2906 | <.0001 |
| <b>coff_1_ti</b>    | -0.1171  | 0.0400 | 8.5646  | 0.0034 |
| <b>coff_2</b>       | 0.4220   | 0.0614 | 47.2392 | <.0001 |
| <b>coff_2_ti</b>    | -0.0127  | 0.0449 | 0.0797  | 0.7778 |
| <b>coff_3</b>       | 0.3781   | 0.0715 | 27.9853 | <.0001 |
| <b>coff_3_ti</b>    | -0.0578  | 0.0541 | 1.1429  | 0.2850 |
| <b>coff_4</b>       | 0.1666   | 0.0429 | 15.0867 | 0.0001 |
| <b>coff_4_ti</b>    | -0.00363 | 0.0311 | 0.0137  | 0.9070 |
| <b>whgrn_1</b>      | 0.3411   | 0.0550 | 38.4442 | <.0001 |
| <b>whgrn_1_ti</b>   | -0.0703  | 0.0392 | 3.2228  | 0.0726 |
| <b>whgrn_2</b>      | 0.2957   | 0.0532 | 30.9246 | <.0001 |
| <b>whgrn_2_ti</b>   | -0.1207  | 0.0388 | 9.6781  | 0.0019 |
| <b>whgrn_3</b>      | 0.1878   | 0.0536 | 12.2710 | 0.0005 |
| <b>whgrn_3_ti</b>   | -0.1029  | 0.0390 | 6.9486  | 0.0084 |
| <b>whgrn_4</b>      | 0.2376   | 0.0514 | 21.3662 | <.0001 |
| <b>whgrn_4_ti</b>   | -0.1138  | 0.0378 | 9.0354  | 0.0026 |
| <b>soda_1</b>       | -0.1018  | 0.0571 | 3.1758  | 0.0747 |
| <b>soda_1_ti</b>    | -0.00511 | 0.0341 | 0.0225  | 0.8808 |
| <b>soda_2</b>       | -0.0730  | 0.0527 | 1.9202  | 0.1658 |
| <b>soda_2_ti</b>    | -0.0172  | 0.0311 | 0.3054  | 0.5805 |
| <b>soda_3</b>       | -0.0237  | 0.0539 | 0.1940  | 0.6596 |
| <b>soda_3_ti</b>    | -0.0405  | 0.0325 | 1.5508  | 0.2130 |
| <b>soda_4</b>       | -0.0303  | 0.0550 | 0.3042  | 0.5813 |
| <b>soda_4_ti</b>    | -0.0258  | 0.0334 | 0.5993  | 0.4388 |
| <b>cal_1</b>        | -0.0335  | 0.0567 | 0.3483  | 0.5551 |
| <b>cal_1_ti</b>     | 0.0203   | 0.0423 | 0.2307  | 0.6310 |
| <b>cal_2</b>        | -0.00006 | 0.0541 | 0.0000  | 0.9991 |
| <b>cal_2_ti</b>     | 0.00232  | 0.0403 | 0.0033  | 0.9540 |
| <b>cal_3</b>        | -0.0109  | 0.0533 | 0.0418  | 0.8381 |
| <b>cal_3_ti</b>     | -0.0312  | 0.0398 | 0.6149  | 0.4330 |

|                 |          |        |           |        |
|-----------------|----------|--------|-----------|--------|
| <b>cal_4</b>    | -0.0628  | 0.0531 | 1.3990    | 0.2369 |
| <b>cal_4_ti</b> | 0.0201   | 0.0391 | 0.2640    | 0.6074 |
| <b>alc_1</b>    | 0.3788   | 0.0486 | 60.8690   | <.0001 |
| <b>alc_1_ti</b> | -0.0166  | 0.0314 | 0.2783    | 0.5978 |
| <b>alc_2</b>    | 0.1757   | 0.0533 | 10.8813   | 0.0010 |
| <b>alc_2_ti</b> | -0.0286  | 0.0374 | 0.5841    | 0.4447 |
| <b>alc_3</b>    | 0.1799   | 0.0637 | 7.9747    | 0.0047 |
| <b>alc_3_ti</b> | -0.0768  | 0.0476 | 2.6033    | 0.1066 |
| <b>cig_l1_1</b> | -0.2344  | 0.1300 | 3.2508    | 0.0714 |
| <b>cig_1</b>    | 0.2233   | 0.1379 | 2.6213    | 0.1054 |
| <b>cig_l1_2</b> | -0.00530 | 0.1538 | 0.0012    | 0.9725 |
| <b>cig_2</b>    | 0.1199   | 0.1630 | 0.5414    | 0.4618 |
| <b>cig_l1_3</b> | -0.1586  | 0.1334 | 1.4132    | 0.2345 |
| <b>cig_3</b>    | -0.0225  | 0.1426 | 0.0249    | 0.8747 |
| <b>cig_l1_4</b> | -0.1478  | 0.1184 | 1.5581    | 0.2120 |
| <b>cig_4</b>    | -0.0434  | 0.1287 | 0.1139    | 0.7358 |
| <b>mvi_l1</b>   | 0.1075   | 0.0301 | 12.7532   | 0.0004 |
| <b>mvi</b>      | -0.0215  | 0.0303 | 0.5039    | 0.4778 |
| <b>act_1</b>    | 0.5508   | 0.0473 | 135.5033  | <.0001 |
| <b>act_1_ti</b> | -0.1849  | 0.0602 | 9.4382    | 0.0021 |
| <b>act_2</b>    | 0.2142   | 0.0553 | 14.9869   | 0.0001 |
| <b>act_2_ti</b> | -0.1429  | 0.0770 | 3.4484    | 0.0633 |
| <b>act_3</b>    | 0.1870   | 0.1056 | 3.1359    | 0.0766 |
| <b>act_3_ti</b> | -0.2427  | 0.1627 | 2.2231    | 0.1360 |
| <b>act_4</b>    | 0.0495   | 0.0654 | 0.5743    | 0.4486 |
| <b>act_4_ti</b> | 0.0272   | 0.0771 | 0.1240    | 0.7248 |
| <b>act_5</b>    | -0.1307  | 0.1269 | 1.0596    | 0.3033 |
| <b>act_5_ti</b> | -0.1688  | 0.2209 | 0.5837    | 0.4449 |
| <b>can_l1</b>   | -0.7029  | 0.0466 | 227.9790  | <.0001 |
| <b>can</b>      | 1.8062   | 0.0411 | 1934.6684 | <.0001 |
| <b>bmi_l1_1</b> | -0.1361  | 0.1398 | 0.9477    | 0.3303 |
| <b>bmi_1</b>    | 2.3200   | 0.1297 | 319.8185  | <.0001 |

|                  |         |        |          |        |
|------------------|---------|--------|----------|--------|
| <b>bmi_11_2</b>  | -0.4081 | 0.1152 | 12.5587  | 0.0004 |
| <b>bmi_2</b>     | 1.5419  | 0.1105 | 194.7038 | <.0001 |
| <b>bmi_11_3</b>  | -0.2772 | 0.1082 | 6.5655   | 0.0104 |
| <b>bmi_3</b>     | 0.9331  | 0.1050 | 78.9045  | <.0001 |
| <b>bmi_11_4</b>  | -0.1719 | 0.1000 | 2.9584   | 0.0854 |
| <b>bmi_4</b>     | 0.5586  | 0.0976 | 32.7497  | <.0001 |
| <b>bmi_11_5</b>  | -0.0945 | 0.0881 | 1.1499   | 0.2836 |
| <b>bmi_5</b>     | 0.1290  | 0.0879 | 2.1545   | 0.1422 |
| <b>chl_11</b>    | 0.4591  | 0.0733 | 39.2040  | <.0001 |
| <b>chl</b>       | -0.4941 | 0.0730 | 45.7904  | <.0001 |
| <b>hbp_11</b>    | 0.5102  | 0.0701 | 52.9269  | <.0001 |
| <b>hbp</b>       | -0.2452 | 0.0705 | 12.0987  | 0.0005 |
| <b>sta</b>       | -0.4464 | 0.0378 | 139.5656 | <.0001 |
| <b>sta_ti</b>    | 0.1401  | 0.0637 | 4.8374   | 0.0278 |
| <b>asn_11_1</b>  | -0.1803 | 0.0360 | 25.1365  | <.0001 |
| <b>asn_1</b>     | 0.5566  | 0.0364 | 234.1471 | <.0001 |
| <b>asn_11_2</b>  | -0.0859 | 0.0376 | 5.2200   | 0.0223 |
| <b>asn_2</b>     | 0.0569  | 0.0407 | 1.9558   | 0.1620 |
| <b>angcbg_11</b> | 0.1763  | 0.1309 | 1.8121   | 0.1783 |
| <b>angcbg</b>    | 0.0638  | 0.1250 | 0.2603   | 0.6099 |
| <b>str_11</b>    | 0.3153  | 0.1632 | 3.7313   | 0.0534 |
| <b>str</b>       | 0.3210  | 0.1478 | 4.7167   | 0.0299 |
| <b>mi_11</b>     | 0.4527  | 0.2239 | 4.0886   | 0.0432 |
| <b>mi</b>        | 0.1405  | 0.2099 | 0.4482   | 0.5032 |

(C) Logistic model to estimate the probability of menopause

| <b>Parameter</b> | <b>Log odds ratio</b> | <b>Standard error</b> | <b>Wald chi-square</b> | <b>P value</b> |
|------------------|-----------------------|-----------------------|------------------------|----------------|
| <b>Intercept</b> | -2.9465               | 0.8672                | 11.5457                | 0.0007         |
| <b>fhx</b>       | -0.00903              | 0.0196                | 0.2118                 | 0.6454         |
| <b>smkhx</b>     | 0.0709                | 0.0181                | 15.3568                | <.0001         |

|                      |          |          |          |        |
|----------------------|----------|----------|----------|--------|
| <b>ochx</b>          | -0.0838  | 0.0165   | 25.8941  | <.0001 |
| <b>employed_1</b>    | 0.0542   | 0.0315   | 2.9735   | 0.0846 |
| <b>employed_2</b>    | 0.0927   | 0.0471   | 3.8742   | 0.0490 |
| <b>employed_3</b>    | 0.0340   | 0.0249   | 1.8640   | 0.1722 |
| <b>employed_4</b>    | 0.0349   | 0.0317   | 1.2137   | 0.2706 |
| <b>employed_5</b>    | 0.0131   | 0.0239   | 0.3027   | 0.5822 |
| <b>employed_6</b>    | 0.00507  | 0.0350   | 0.0210   | 0.8849 |
| <b>employed_miss</b> | -0.1355  | 0.1075   | 1.5897   | 0.2074 |
| <b>mar80</b>         | -0.0123  | 0.0300   | 0.1679   | 0.6819 |
| <b>college</b>       | 0.0705   | 0.0170   | 17.1257  | <.0001 |
| <b>stress82</b>      | -0.0264  | 0.0187   | 1.9984   | 0.1575 |
| <b>stress82_miss</b> | -0.1728  | 0.1003   | 2.9688   | 0.0849 |
| <b>hhighsch</b>      | 0.1888   | 0.0210   | 80.9630  | <.0001 |
| <b>hcollege</b>      | 0.1585   | 0.0223   | 50.7270  | <.0001 |
| <b>hgradsch</b>      | 0.1645   | 0.0234   | 49.2923  | <.0001 |
| <b>lbmi18_2</b>      | 0.000255 | 0.0197   | 0.0002   | 0.9897 |
| <b>lbmi18_3</b>      | 0.0403   | 0.0312   | 1.6665   | 0.1967 |
| <b>lbmi18_4</b>      | 0.0613   | 0.0739   | 0.6866   | 0.4073 |
| <b>baseage</b>       | -0.0844  | 0.0386   | 4.7842   | 0.0287 |
| <b>baseage_sq</b>    | 0.00525  | 0.000426 | 152.3331 | <.0001 |
| <b>bmi80_1</b>       | 0.1823   | 0.1132   | 2.5955   | 0.1072 |
| <b>bmi80_2</b>       | 0.0888   | 0.0755   | 1.3830   | 0.2396 |
| <b>bmi80_3</b>       | 0.0218   | 0.0715   | 0.0932   | 0.7601 |
| <b>bmi80_4</b>       | 0.00246  | 0.0674   | 0.0013   | 0.9709 |
| <b>bmi80_5</b>       | -0.0479  | 0.0631   | 0.5760   | 0.4479 |
| <b>act80_1</b>       | 0.0166   | 0.0238   | 0.4853   | 0.4860 |
| <b>act80_2</b>       | -0.0127  | 0.0271   | 0.2204   | 0.6387 |
| <b>act80_3</b>       | 0.00779  | 0.0242   | 0.1033   | 0.7479 |
| <b>alc80_1</b>       | -0.0164  | 0.0278   | 0.3477   | 0.5554 |
| <b>alc80_2</b>       | -0.0473  | 0.0262   | 3.2624   | 0.0709 |
| <b>alc80_3</b>       | -0.00463 | 0.0286   | 0.0262   | 0.8715 |
| <b>rpmeats80_1</b>   | -0.1070  | 0.0501   | 4.5560   | 0.0328 |

|                        |          |        |           |        |
|------------------------|----------|--------|-----------|--------|
| <b>rpmeats80_2</b>     | -0.0197  | 0.0296 | 0.4443    | 0.5051 |
| <b>rpmeats80_3</b>     | 0.0313   | 0.0236 | 1.7707    | 0.1833 |
| <b>rpmeats80_4</b>     | 0.00136  | 0.0210 | 0.0042    | 0.9482 |
| <b>coff80_1</b>        | -0.00904 | 0.0231 | 0.1528    | 0.6959 |
| <b>coff80_2</b>        | -0.0569  | 0.0312 | 3.3301    | 0.0680 |
| <b>coff80_3</b>        | 0.0154   | 0.0491 | 0.0986    | 0.7535 |
| <b>whgrn80_1</b>       | 0.00651  | 0.0236 | 0.0764    | 0.7823 |
| <b>whgrn80_2</b>       | -0.0275  | 0.0255 | 1.1609    | 0.2813 |
| <b>soda80_1</b>        | 0.0244   | 0.0308 | 0.6270    | 0.4285 |
| <b>soda80_2</b>        | 0.0209   | 0.0254 | 0.6758    | 0.4110 |
| <b>soda80_3</b>        | -0.00189 | 0.0243 | 0.0060    | 0.9382 |
| <b>soda80_4</b>        | -0.0164  | 0.0230 | 0.5120    | 0.4743 |
| <b>cig80_1</b>         | -0.1929  | 0.0731 | 6.9696    | 0.0083 |
| <b>cig80_2</b>         | -0.2512  | 0.0872 | 8.3052    | 0.0040 |
| <b>cig80_3</b>         | -0.1099  | 0.0790 | 1.9377    | 0.1639 |
| <b>cig80_4</b>         | -0.0411  | 0.0682 | 0.3626    | 0.5471 |
| <b>period_2</b>        | -6.5366  | 0.1118 | 3420.0480 | <.0001 |
| <b>period_3</b>        | -5.8481  | 0.1037 | 3182.7228 | <.0001 |
| <b>period_4</b>        | -5.0625  | 0.0845 | 3592.1652 | <.0001 |
| <b>period_5</b>        | -4.2058  | 0.1091 | 1486.2281 | <.0001 |
| <b>period_6</b>        | -3.2997  | 0.0795 | 1722.2274 | <.0001 |
| <b>period_7</b>        | -2.6740  | 0.1018 | 689.8107  | <.0001 |
| <b>period_8</b>        | -1.8295  | 0.0789 | 537.6775  | <.0001 |
| <b>period_9</b>        | -0.6956  | 0.1056 | 43.3680   | <.0001 |
| <b>pmh_12</b>          | 0.1727   | 0.0352 | 24.0228   | <.0001 |
| <b>pmh_11</b>          | -0.7385  | 0.0315 | 549.5432  | <.0001 |
| <b>ost_12</b>          | 0.0153   | 0.1030 | 0.0221    | 0.8817 |
| <b>ost_11</b>          | 0.0818   | 0.0856 | 0.9138    | 0.3391 |
| <b>rpmeats_11_1</b>    | 0.1067   | 0.0389 | 7.5424    | 0.0060 |
| <b>rpmeats_11_1_ti</b> | -0.00829 | 0.0301 | 0.0759    | 0.7829 |
| <b>rpmeats_11_2</b>    | 0.0465   | 0.0324 | 2.0586    | 0.1513 |
| <b>rpmeats_11_2_ti</b> | 0.0187   | 0.0257 | 0.5276    | 0.4676 |

|                        |          |        |        |        |
|------------------------|----------|--------|--------|--------|
| <b>rpmeats_l1_3</b>    | 0.0799   | 0.0304 | 6.8911 | 0.0087 |
| <b>rpmeats_l1_3_ti</b> | -0.00353 | 0.0243 | 0.0210 | 0.8848 |
| <b>rpmeats_l1_4</b>    | 0.0436   | 0.0276 | 2.4947 | 0.1142 |
| <b>rpmeats_l1_4_ti</b> | -0.00611 | 0.0223 | 0.0747 | 0.7847 |
| <b>coff_l1_1</b>       | -0.0581  | 0.0359 | 2.6099 | 0.1062 |
| <b>coff_l1_1_ti</b>    | -0.0218  | 0.0250 | 0.7619 | 0.3827 |
| <b>coff_l1_2</b>       | -0.0507  | 0.0420 | 1.4540 | 0.2279 |
| <b>coff_l1_2_ti</b>    | 0.0428   | 0.0321 | 1.7777 | 0.1824 |
| <b>coff_l1_3</b>       | -0.0424  | 0.0495 | 0.7322 | 0.3922 |
| <b>coff_l1_3_ti</b>    | 0.0574   | 0.0393 | 2.1300 | 0.1444 |
| <b>coff_l1_4</b>       | -0.0314  | 0.0221 | 2.0205 | 0.1552 |
| <b>coff_l1_4_ti</b>    | 0.0325   | 0.0178 | 3.3461 | 0.0674 |
| <b>whgrn_l1_1</b>      | -0.0138  | 0.0339 | 0.1665 | 0.6833 |
| <b>whgrn_l1_1_ti</b>   | -0.0236  | 0.0267 | 0.7809 | 0.3769 |
| <b>whgrn_l1_2</b>      | -0.0162  | 0.0324 | 0.2492 | 0.6177 |
| <b>whgrn_l1_2_ti</b>   | -0.00218 | 0.0257 | 0.0072 | 0.9324 |
| <b>whgrn_l1_3</b>      | 0.0298   | 0.0322 | 0.8525 | 0.3558 |
| <b>whgrn_l1_3_ti</b>   | -0.0326  | 0.0257 | 1.6084 | 0.2047 |
| <b>whgrn_l1_4</b>      | 0.00396  | 0.0326 | 0.0148 | 0.9031 |
| <b>whgrn_l1_4_ti</b>   | 0.00281  | 0.0259 | 0.0117 | 0.9137 |
| <b>soda_l1_1</b>       | -0.1218  | 0.0441 | 7.6209 | 0.0058 |
| <b>soda_l1_1_ti</b>    | 0.0326   | 0.0206 | 2.5070 | 0.1133 |
| <b>soda_l1_2</b>       | -0.0803  | 0.0328 | 5.9974 | 0.0143 |
| <b>soda_l1_2_ti</b>    | 0.0184   | 0.0154 | 1.4233 | 0.2329 |
| <b>soda_l1_3</b>       | -0.0220  | 0.0309 | 0.5097 | 0.4753 |
| <b>soda_l1_3_ti</b>    | -0.00152 | 0.0148 | 0.0105 | 0.9186 |
| <b>soda_l1_4</b>       | -0.0214  | 0.0299 | 0.5115 | 0.4745 |
| <b>soda_l1_4_ti</b>    | -0.00496 | 0.0149 | 0.1108 | 0.7393 |
| <b>cal_l1_1</b>        | -0.1031  | 0.0365 | 7.9652 | 0.0048 |
| <b>cal_l1_1_ti</b>     | 0.00880  | 0.0294 | 0.0896 | 0.7646 |
| <b>cal_l1_2</b>        | -0.0253  | 0.0327 | 0.5960 | 0.4401 |
| <b>cal_l1_2_ti</b>     | -0.0333  | 0.0264 | 1.5956 | 0.2065 |

|                    |          |        |        |        |
|--------------------|----------|--------|--------|--------|
| <b>cal_l1_3</b>    | 0.00579  | 0.0310 | 0.0348 | 0.8520 |
| <b>cal_l1_3_ti</b> | -0.0430  | 0.0250 | 2.9585 | 0.0854 |
| <b>cal_l1_4</b>    | -0.0218  | 0.0298 | 0.5343 | 0.4648 |
| <b>cal_l1_4_ti</b> | -0.0256  | 0.0240 | 1.1402 | 0.2856 |
| <b>alc_l1_1</b>    | 0.0138   | 0.0331 | 0.1731 | 0.6773 |
| <b>alc_l1_1_ti</b> | -0.0176  | 0.0217 | 0.6577 | 0.4174 |
| <b>alc_l1_2</b>    | 0.0489   | 0.0318 | 2.3625 | 0.1243 |
| <b>alc_l1_2_ti</b> | -0.0112  | 0.0229 | 0.2389 | 0.6250 |
| <b>alc_l1_3</b>    | 0.0219   | 0.0359 | 0.3744 | 0.5406 |
| <b>alc_l1_3_ti</b> | -0.0254  | 0.0285 | 0.8000 | 0.3711 |
| <b>cig_l2_1</b>    | -0.1514  | 0.0933 | 2.6329 | 0.1047 |
| <b>cig_l1_1</b>    | -0.2315  | 0.0911 | 6.4589 | 0.0110 |
| <b>cig_l2_2</b>    | 0.0120   | 0.1098 | 0.0119 | 0.9131 |
| <b>cig_l1_2</b>    | -0.1648  | 0.1094 | 2.2698 | 0.1319 |
| <b>cig_l2_3</b>    | -0.0949  | 0.0969 | 0.9594 | 0.3273 |
| <b>cig_l1_3</b>    | 0.0282   | 0.0950 | 0.0879 | 0.7668 |
| <b>cig_l2_4</b>    | -0.0611  | 0.0824 | 0.5495 | 0.4585 |
| <b>cig_l1_4</b>    | 0.0682   | 0.0827 | 0.6795 | 0.4098 |
| <b>mvi_l2</b>      | 0.0379   | 0.0161 | 5.5397 | 0.0186 |
| <b>mvi_l1</b>      | -0.0185  | 0.0161 | 1.3324 | 0.2484 |
| <b>act_l1_1</b>    | 0.0391   | 0.0279 | 1.9572 | 0.1618 |
| <b>act_l1_1_ti</b> | -0.0108  | 0.0235 | 0.2093 | 0.6473 |
| <b>act_l1_2</b>    | 0.0525   | 0.0313 | 2.8101 | 0.0937 |
| <b>act_l1_2_ti</b> | -0.0498  | 0.0277 | 3.2427 | 0.0717 |
| <b>act_l1_3</b>    | 0.0434   | 0.0505 | 0.7390 | 0.3900 |
| <b>act_l1_3_ti</b> | 0.0114   | 0.0526 | 0.0471 | 0.8281 |
| <b>act_l1_4</b>    | -0.0214  | 0.0351 | 0.3708 | 0.5426 |
| <b>act_l1_4_ti</b> | 0.00798  | 0.0286 | 0.0779 | 0.7802 |
| <b>act_l1_5</b>    | -0.00057 | 0.0545 | 0.0001 | 0.9916 |
| <b>act_l1_5_ti</b> | 0.00847  | 0.0585 | 0.0209 | 0.8849 |
| <b>can_l2</b>      | -0.1753  | 0.1049 | 2.7915 | 0.0948 |
| <b>can_l1</b>      | 0.0748   | 0.0851 | 0.7729 | 0.3793 |

|                  |         |        |        |        |
|------------------|---------|--------|--------|--------|
| <b>bmi_l2_1</b>  | 0.0643  | 0.1491 | 0.1857 | 0.6665 |
| <b>bmi_l1_1</b>  | 0.0485  | 0.1429 | 0.1152 | 0.7343 |
| <b>bmi_l2_2</b>  | 0.0615  | 0.0815 | 0.5690 | 0.4506 |
| <b>bmi_l1_2</b>  | 0.0476  | 0.0724 | 0.4327 | 0.5107 |
| <b>bmi_l2_3</b>  | 0.1020  | 0.0759 | 1.8055 | 0.1790 |
| <b>bmi_l1_3</b>  | 0.00775 | 0.0674 | 0.0132 | 0.9085 |
| <b>bmi_l2_4</b>  | 0.0727  | 0.0703 | 1.0707 | 0.3008 |
| <b>bmi_l1_4</b>  | 0.0134  | 0.0622 | 0.0465 | 0.8293 |
| <b>bmi_l2_5</b>  | 0.0744  | 0.0614 | 1.4659 | 0.2260 |
| <b>bmi_l1_5</b>  | 0.0240  | 0.0555 | 0.1876 | 0.6649 |
| <b>chl_l2</b>    | -0.0195 | 0.0362 | 0.2894 | 0.5906 |
| <b>chl_l1</b>    | 0.0185  | 0.0319 | 0.3380 | 0.5610 |
| <b>hbp_l2</b>    | 0.0272  | 0.0452 | 0.3619 | 0.5475 |
| <b>hbp_l1</b>    | -0.0194 | 0.0426 | 0.2068 | 0.6493 |
| <b>sta_l1</b>    | 0.2044  | 0.0730 | 7.8391 | 0.0051 |
| <b>sta_l1_ti</b> | 0.0238  | 0.0598 | 0.1583 | 0.6907 |
| <b>asn_l2_1</b>  | -0.0222 | 0.0337 | 0.4361 | 0.5090 |
| <b>asn_l1_1</b>  | -0.0223 | 0.0325 | 0.4706 | 0.4927 |
| <b>asn_l2_2</b>  | 0.00123 | 0.0319 | 0.0015 | 0.9692 |
| <b>asn_l1_2</b>  | -0.0191 | 0.0306 | 0.3913 | 0.5316 |
| <b>angcbg_l2</b> | -0.0748 | 0.1445 | 0.2683 | 0.6045 |
| <b>angcbg_l1</b> | 0.0845  | 0.1179 | 0.5134 | 0.4737 |
| <b>str_l2</b>    | -0.0459 | 0.4801 | 0.0091 | 0.9239 |
| <b>str_l1</b>    | -0.0624 | 0.3691 | 0.0286 | 0.8656 |
| <b>mi_l2</b>     | 0.5084  | 0.4477 | 1.2897 | 0.2561 |
| <b>mi_l1</b>     | -0.2973 | 0.3306 | 0.8089 | 0.3684 |

---

(D) Logistic model to estimate the probability of post-menopausal hormone use



| <b>Parameter</b>     | <b>Log odds ratio</b> | <b>Standard error</b> | <b>Wald chi-square</b> | <b>P value</b> |
|----------------------|-----------------------|-----------------------|------------------------|----------------|
| <b>Intercept</b>     | -6.6952               | 0.2388                | 785.9652               | <.0001         |
| <b>fhx</b>           | 0.00824               | 0.0107                | 0.5901                 | 0.4424         |
| <b>smkhx</b>         | 0.00401               | 0.00997               | 0.1620                 | 0.6873         |
| <b>ochx</b>          | 0.1981                | 0.00911               | 472.4834               | <.0001         |
| <b>employed_1</b>    | 0.0241                | 0.0170                | 2.0216                 | 0.1551         |
| <b>employed_2</b>    | 0.1720                | 0.0264                | 42.5934                | <.0001         |
| <b>employed_3</b>    | 0.0181                | 0.0138                | 1.7071                 | 0.1914         |
| <b>employed_4</b>    | 0.0866                | 0.0176                | 24.2401                | <.0001         |
| <b>employed_5</b>    | 0.0422                | 0.0128                | 10.9486                | 0.0009         |
| <b>employed_6</b>    | 0.0284                | 0.0188                | 2.2929                 | 0.1300         |
| <b>employed_miss</b> | -0.0945               | 0.0616                | 2.3524                 | 0.1251         |
| <b>mar80</b>         | -0.00688              | 0.0163                | 0.1784                 | 0.6728         |
| <b>college</b>       | 0.0560                | 0.00960               | 33.9762                | <.0001         |
| <b>stress82</b>      | 0.0561                | 0.0102                | 30.3413                | <.0001         |
| <b>stress82_miss</b> | -0.0223               | 0.0571                | 0.1526                 | 0.6960         |
| <b>hhighsch</b>      | 0.1111                | 0.0120                | 85.5163                | <.0001         |
| <b>hcollege</b>      | 0.1436                | 0.0129                | 124.7468               | <.0001         |
| <b>hgradsch</b>      | 0.1900                | 0.0135                | 198.4047               | <.0001         |
| <b>lbmi18_2</b>      | 0.0168                | 0.0108                | 2.3993                 | 0.1214         |
| <b>lbmi18_3</b>      | 0.0250                | 0.0176                | 2.0197                 | 0.1553         |
| <b>lbmi18_4</b>      | 0.0165                | 0.0429                | 0.1477                 | 0.7008         |
| <b>baseage</b>       | 0.0677                | 0.00928               | 53.2472                | <.0001         |
| <b>baseage_sq</b>    | -0.00091              | 0.000092              | 98.5570                | <.0001         |
| <b>bmi80_1</b>       | 0.3738                | 0.0609                | 37.6423                | <.0001         |
| <b>bmi80_2</b>       | 0.3043                | 0.0427                | 50.8925                | <.0001         |
| <b>bmi80_3</b>       | 0.2551                | 0.0409                | 38.8757                | <.0001         |
| <b>bmi80_4</b>       | 0.2114                | 0.0391                | 29.2093                | <.0001         |
| <b>bmi80_5</b>       | 0.1642                | 0.0379                | 18.7833                | <.0001         |
| <b>act80_1</b>       | -0.0165               | 0.0124                | 1.7858                 | 0.1814         |
| <b>act80_2</b>       | -0.00111              | 0.0144                | 0.0059                 | 0.9386         |

|                    |         |        |           |        |
|--------------------|---------|--------|-----------|--------|
| <b>act80_3</b>     | 0.00165 | 0.0127 | 0.0168    | 0.8970 |
| <b>alc80_1</b>     | -0.0281 | 0.0145 | 3.7363    | 0.0532 |
| <b>alc80_2</b>     | -0.0289 | 0.0138 | 4.3562    | 0.0369 |
| <b>alc80_3</b>     | -0.0260 | 0.0154 | 2.8377    | 0.0921 |
| <b>rpmeats80_1</b> | -0.0601 | 0.0246 | 5.9439    | 0.0148 |
| <b>rpmeats80_2</b> | -0.0425 | 0.0154 | 7.5971    | 0.0058 |
| <b>rpmeats80_3</b> | -0.0597 | 0.0131 | 20.7177   | <.0001 |
| <b>rpmeats80_4</b> | -0.0337 | 0.0118 | 8.2213    | 0.0041 |
| <b>coff80_1</b>    | 0.0119  | 0.0125 | 0.9095    | 0.3402 |
| <b>coff80_2</b>    | 0.0223  | 0.0177 | 1.5767    | 0.2092 |
| <b>coff80_3</b>    | -0.0363 | 0.0279 | 1.6945    | 0.1930 |
| <b>whgrn80_1</b>   | -0.0225 | 0.0126 | 3.1961    | 0.0738 |
| <b>whgrn80_2</b>   | 0.00588 | 0.0134 | 0.1930    | 0.6604 |
| <b>soda80_1</b>    | -0.0686 | 0.0162 | 17.9933   | <.0001 |
| <b>soda80_2</b>    | -0.0234 | 0.0141 | 2.7502    | 0.0972 |
| <b>soda80_3</b>    | 0.0144  | 0.0139 | 1.0724    | 0.3004 |
| <b>soda80_4</b>    | 0.00975 | 0.0133 | 0.5335    | 0.4651 |
| <b>cig80_1</b>     | 0.0954  | 0.0367 | 6.7681    | 0.0093 |
| <b>cig80_2</b>     | 0.1059  | 0.0451 | 5.5144    | 0.0189 |
| <b>cig80_3</b>     | 0.0403  | 0.0399 | 1.0214    | 0.3122 |
| <b>cig80_4</b>     | 0.00692 | 0.0354 | 0.0382    | 0.8451 |
| <b>period_2</b>    | 1.5432  | 0.0500 | 950.7227  | <.0001 |
| <b>period_3</b>    | 1.8597  | 0.0428 | 1885.2599 | <.0001 |
| <b>period_4</b>    | 1.8284  | 0.0291 | 3934.6034 | <.0001 |
| <b>period_5</b>    | 2.0242  | 0.0494 | 1677.6270 | <.0001 |
| <b>period_6</b>    | 1.9097  | 0.0254 | 5663.1779 | <.0001 |
| <b>period_7</b>    | 2.0278  | 0.0435 | 2171.2335 | <.0001 |
| <b>period_8</b>    | 1.9125  | 0.0244 | 6167.0829 | <.0001 |
| <b>period_9</b>    | 1.3445  | 0.0437 | 946.7882  | <.0001 |
| <b>period_10</b>   | 0.5144  | 0.0234 | 485.1077  | <.0001 |
| <b>period_11</b>   | -0.7200 | 0.0436 | 272.4539  | <.0001 |
| <b>mnp_l2</b>      | -0.7250 | 0.0174 | 1738.8538 | <.0001 |

|                        |          |         |            |        |
|------------------------|----------|---------|------------|--------|
| <b>mnp_l1</b>          | -0.9376  | 0.0199  | 2230.3604  | <.0001 |
| <b>pmh_l2</b>          | 1.3545   | 0.0119  | 12869.7563 | <.0001 |
| <b>pmh_l1</b>          | 3.2251   | 0.0110  | 86601.7517 | <.0001 |
| <b>ost_l2</b>          | -0.0191  | 0.0290  | 0.4343     | 0.5099 |
| <b>ost_l1</b>          | 0.0798   | 0.0261  | 9.3737     | 0.0022 |
| <b>rpmeats_l1_1</b>    | -0.00180 | 0.0215  | 0.0070     | 0.9332 |
| <b>rpmeats_l1_1_ti</b> | -0.00510 | 0.0156  | 0.1064     | 0.7443 |
| <b>rpmeats_l1_2</b>    | -0.00120 | 0.0193  | 0.0039     | 0.9504 |
| <b>rpmeats_l1_2_ti</b> | 0.0119   | 0.0144  | 0.6826     | 0.4087 |
| <b>rpmeats_l1_3</b>    | 0.00542  | 0.0187  | 0.0837     | 0.7724 |
| <b>rpmeats_l1_3_ti</b> | 0.00536  | 0.0141  | 0.1443     | 0.7041 |
| <b>rpmeats_l1_4</b>    | 0.00425  | 0.0178  | 0.0572     | 0.8110 |
| <b>rpmeats_l1_4_ti</b> | 0.0121   | 0.0135  | 0.8033     | 0.3701 |
| <b>coff_l1_1</b>       | -0.0442  | 0.0210  | 4.4387     | 0.0351 |
| <b>coff_l1_1_ti</b>    | -0.00236 | 0.0142  | 0.0274     | 0.8684 |
| <b>coff_l1_2</b>       | -0.0615  | 0.0233  | 6.9616     | 0.0083 |
| <b>coff_l1_2_ti</b>    | 0.00239  | 0.0170  | 0.0197     | 0.8883 |
| <b>coff_l1_3</b>       | -0.0774  | 0.0277  | 7.7943     | 0.0052 |
| <b>coff_l1_3_ti</b>    | 0.0176   | 0.0206  | 0.7271     | 0.3938 |
| <b>coff_l1_4</b>       | -0.0774  | 0.0134  | 33.5148    | <.0001 |
| <b>coff_l1_4_ti</b>    | 0.0204   | 0.00997 | 4.1948     | 0.0405 |
| <b>whgrn_l1_1</b>      | -0.2019  | 0.0198  | 103.4680   | <.0001 |
| <b>whgrn_l1_1_ti</b>   | 0.0397   | 0.0146  | 7.3603     | 0.0067 |
| <b>whgrn_l1_2</b>      | -0.1030  | 0.0186  | 30.7470    | <.0001 |
| <b>whgrn_l1_2_ti</b>   | 0.0302   | 0.0138  | 4.8243     | 0.0281 |
| <b>whgrn_l1_3</b>      | -0.0467  | 0.0180  | 6.7272     | 0.0095 |
| <b>whgrn_l1_3_ti</b>   | 0.00778  | 0.0134  | 0.3391     | 0.5604 |
| <b>whgrn_l1_4</b>      | 0.00903  | 0.0176  | 0.2624     | 0.6085 |
| <b>whgrn_l1_4_ti</b>   | -0.00140 | 0.0131  | 0.0114     | 0.9148 |
| <b>soda_l1_1</b>       | -0.0839  | 0.0225  | 13.8909    | 0.0002 |
| <b>soda_l1_1_ti</b>    | -0.00602 | 0.0116  | 0.2683     | 0.6045 |
| <b>soda_l1_2</b>       | -0.0843  | 0.0186  | 20.6166    | <.0001 |

|                     |          |         |         |        |
|---------------------|----------|---------|---------|--------|
| <b>soda_l1_2_ti</b> | 0.00138  | 0.00950 | 0.0211  | 0.8844 |
| <b>soda_l1_3</b>    | -0.0777  | 0.0184  | 17.9005 | <.0001 |
| <b>soda_l1_3_ti</b> | 0.00690  | 0.00954 | 0.5235  | 0.4693 |
| <b>soda_l1_4</b>    | -0.0213  | 0.0183  | 1.3571  | 0.2440 |
| <b>soda_l1_4_ti</b> | -0.00577 | 0.00969 | 0.3544  | 0.5517 |
| <b>cal_l1_1</b>     | 0.1589   | 0.0213  | 55.7099 | <.0001 |
| <b>cal_l1_1_ti</b>  | -0.0368  | 0.0159  | 5.3447  | 0.0208 |
| <b>cal_l1_2</b>     | 0.1569   | 0.0193  | 66.0049 | <.0001 |
| <b>cal_l1_2_ti</b>  | -0.0482  | 0.0144  | 11.1324 | 0.0008 |
| <b>cal_l1_3</b>     | 0.1063   | 0.0184  | 33.4038 | <.0001 |
| <b>cal_l1_3_ti</b>  | -0.0257  | 0.0138  | 3.4840  | 0.0620 |
| <b>cal_l1_4</b>     | 0.0962   | 0.0177  | 29.4961 | <.0001 |
| <b>cal_l1_4_ti</b>  | -0.0179  | 0.0133  | 1.8239  | 0.1769 |
| <b>alc_l1_1</b>     | -0.0713  | 0.0183  | 15.1275 | 0.0001 |
| <b>alc_l1_1_ti</b>  | 0.0169   | 0.0116  | 2.1322  | 0.1442 |
| <b>alc_l1_2</b>     | -0.0430  | 0.0181  | 5.6619  | 0.0173 |
| <b>alc_l1_2_ti</b>  | 0.0367   | 0.0125  | 8.6538  | 0.0033 |
| <b>alc_l1_3</b>     | -0.0444  | 0.0210  | 4.4779  | 0.0343 |
| <b>alc_l1_3_ti</b>  | 0.0345   | 0.0155  | 4.9533  | 0.0260 |
| <b>cig_l2_1</b>     | -0.0500  | 0.0591  | 0.7162  | 0.3974 |
| <b>cig_l1_1</b>     | 0.2713   | 0.0611  | 19.7368 | <.0001 |
| <b>cig_l2_2</b>     | 0.00120  | 0.0681  | 0.0003  | 0.9859 |
| <b>cig_l1_2</b>     | 0.1923   | 0.0705  | 7.4303  | 0.0064 |
| <b>cig_l2_3</b>     | -0.0871  | 0.0604  | 2.0776  | 0.1495 |
| <b>cig_l1_3</b>     | 0.1318   | 0.0627  | 4.4213  | 0.0355 |
| <b>cig_l2_4</b>     | -0.0958  | 0.0538  | 3.1730  | 0.0749 |
| <b>cig_l1_4</b>     | 0.0884   | 0.0567  | 2.4266  | 0.1193 |
| <b>mvi_l2</b>       | 0.0375   | 0.00940 | 15.8845 | <.0001 |
| <b>mvi_l1</b>       | 0.0695   | 0.00948 | 53.8109 | <.0001 |
| <b>act_l1_1</b>     | -0.0366  | 0.0141  | 6.7517  | 0.0094 |
| <b>act_l1_1_ti</b>  | -0.0345  | 0.0151  | 5.2307  | 0.0222 |
| <b>act_l1_2</b>     | 0.0194   | 0.0161  | 1.4458  | 0.2292 |

|                    |         |        |          |        |
|--------------------|---------|--------|----------|--------|
| <b>act_l1_2_ti</b> | -0.0330 | 0.0177 | 3.4499   | 0.0633 |
| <b>act_l1_3</b>    | 0.0537  | 0.0280 | 3.6700   | 0.0554 |
| <b>act_l1_3_ti</b> | -0.0977 | 0.0358 | 7.4284   | 0.0064 |
| <b>act_l1_4</b>    | 0.0582  | 0.0182 | 10.2844  | 0.0013 |
| <b>act_l1_4_ti</b> | -0.0477 | 0.0183 | 6.7686   | 0.0093 |
| <b>act_l1_5</b>    | 0.0593  | 0.0292 | 4.1124   | 0.0426 |
| <b>act_l1_5_ti</b> | -0.0435 | 0.0388 | 1.2590   | 0.2618 |
| <b>can_l2</b>      | 0.4540  | 0.0426 | 113.6308 | <.0001 |
| <b>can_l1</b>      | -0.6892 | 0.0371 | 345.8876 | <.0001 |
| <b>bmi_l2_1</b>    | 0.0493  | 0.0747 | 0.4361   | 0.5090 |
| <b>bmi_l1_1</b>    | 0.1515  | 0.0699 | 4.6967   | 0.0302 |
| <b>bmi_l2_2</b>    | 0.0668  | 0.0453 | 2.1745   | 0.1403 |
| <b>bmi_l1_2</b>    | 0.2402  | 0.0422 | 32.4063  | <.0001 |
| <b>bmi_l2_3</b>    | 0.0682  | 0.0423 | 2.6037   | 0.1066 |
| <b>bmi_l1_3</b>    | 0.2018  | 0.0394 | 26.2249  | <.0001 |
| <b>bmi_l2_4</b>    | 0.0179  | 0.0393 | 0.2065   | 0.6495 |
| <b>bmi_l1_4</b>    | 0.1514  | 0.0367 | 17.0424  | <.0001 |
| <b>bmi_l2_5</b>    | -0.0208 | 0.0350 | 0.3527   | 0.5526 |
| <b>bmi_l1_5</b>    | 0.0815  | 0.0329 | 6.1445   | 0.0132 |
| <b>chl_l2</b>      | -0.0345 | 0.0189 | 3.3358   | 0.0678 |
| <b>chl_l1</b>      | 0.1189  | 0.0180 | 43.8229  | <.0001 |
| <b>hbp_l2</b>      | 0.00750 | 0.0223 | 0.1130   | 0.7368 |
| <b>hbp_l1</b>      | 0.0110  | 0.0217 | 0.2553   | 0.6134 |
| <b>sta_l1</b>      | 0.00198 | 0.0171 | 0.0133   | 0.9083 |
| <b>sta_l1_ti</b>   | 0.0275  | 0.0220 | 1.5608   | 0.2116 |
| <b>asn_l2_1</b>    | -0.0553 | 0.0150 | 13.5235  | 0.0002 |
| <b>asn_l1_1</b>    | -0.0167 | 0.0145 | 1.3253   | 0.2496 |
| <b>asn_l2_2</b>    | -0.0388 | 0.0143 | 7.3354   | 0.0068 |
| <b>asn_l1_2</b>    | -0.0311 | 0.0140 | 4.9194   | 0.0266 |
| <b>angcbg_l2</b>   | 0.0399  | 0.0556 | 0.5141   | 0.4734 |
| <b>angcbg_l1</b>   | 0.00559 | 0.0500 | 0.0125   | 0.9111 |
| <b>str_l2</b>      | 0.1852  | 0.1295 | 2.0471   | 0.1525 |

|               |         |        |            |        |
|---------------|---------|--------|------------|--------|
| <b>str_l1</b> | -0.2474 | 0.1092 | 5.1299     | 0.0235 |
| <b>mi_l2</b>  | -0.0678 | 0.1316 | 0.2657     | 0.6063 |
| <b>mi_l1</b>  | -0.0974 | 0.1137 | 0.7336     | 0.3917 |
| <b>mnp</b>    | 2.2669  | 0.0177 | 16400.3575 | <.0001 |

(E) Logistic model to estimate the probability of osteoporosis

| <b>Variable</b>      | <b>Log odds ratio</b> | <b>Standard error</b> | <b>Wald chi-square</b> | <b>P value</b> |
|----------------------|-----------------------|-----------------------|------------------------|----------------|
| <b>Intercept</b>     | -7.6320               | 0.4548                | 281.6447               | <.0001         |
| <b>fhx</b>           | 0.00256               | 0.0192                | 0.0176                 | 0.8943         |
| <b>smkhx</b>         | 0.0463                | 0.0181                | 6.5177                 | 0.0107         |
| <b>ochx</b>          | -0.00756              | 0.0165                | 0.2100                 | 0.6467         |
| <b>employed_1</b>    | 0.0306                | 0.0301                | 1.0377                 | 0.3084         |
| <b>employed_2</b>    | -0.1669               | 0.0520                | 10.3023                | 0.0013         |
| <b>employed_3</b>    | 0.0140                | 0.0245                | 0.3271                 | 0.5674         |
| <b>employed_4</b>    | 0.00296               | 0.0324                | 0.0083                 | 0.9274         |
| <b>employed_5</b>    | 0.0170                | 0.0225                | 0.5703                 | 0.4501         |
| <b>employed_6</b>    | -0.0117               | 0.0334                | 0.1221                 | 0.7268         |
| <b>employed_miss</b> | -0.1739               | 0.1043                | 2.7802                 | 0.0954         |
| <b>mar80</b>         | -0.0123               | 0.0284                | 0.1877                 | 0.6649         |
| <b>college</b>       | 0.0149                | 0.0176                | 0.7159                 | 0.3975         |
| <b>stress82</b>      | 0.1312                | 0.0183                | 51.5256                | <.0001         |
| <b>stress82_miss</b> | 0.2498                | 0.0955                | 6.8459                 | 0.0089         |
| <b>hhhighsch</b>     | 0.0502                | 0.0216                | 5.3931                 | 0.0202         |
| <b>hcollege</b>      | 0.0304                | 0.0236                | 1.6579                 | 0.1979         |
| <b>hgradsch</b>      | 0.00672               | 0.0250                | 0.0722                 | 0.7882         |
| <b>lbmi18_2</b>      | 0.0359                | 0.0196                | 3.3475                 | 0.0673         |
| <b>lbmi18_3</b>      | 0.1374                | 0.0316                | 18.8762                | <.0001         |
| <b>lbmi18_4</b>      | 0.2312                | 0.0747                | 9.5957                 | 0.0020         |
| <b>baseage</b>       | 0.0928                | 0.0174                | 28.5416                | <.0001         |
| <b>baseage_sq</b>    | -0.00042              | 0.000168              | 6.1813                 | 0.0129         |
| <b>bmi80_1</b>       | 0.1272                | 0.1027                | 1.5338                 | 0.2155         |

|                    |         |        |          |        |
|--------------------|---------|--------|----------|--------|
| <b>bmi80_2</b>     | 0.0545  | 0.0770 | 0.5014   | 0.4789 |
| <b>bmi80_3</b>     | -0.0565 | 0.0744 | 0.5770   | 0.4475 |
| <b>bmi80_4</b>     | -0.0980 | 0.0716 | 1.8754   | 0.1709 |
| <b>bmi80_5</b>     | -0.0620 | 0.0700 | 0.7855   | 0.3755 |
| <b>act80_1</b>     | 0.0714  | 0.0216 | 10.9486  | 0.0009 |
| <b>act80_2</b>     | 0.0116  | 0.0257 | 0.2032   | 0.6522 |
| <b>act80_3</b>     | -0.0337 | 0.0228 | 2.1835   | 0.1395 |
| <b>alc80_1</b>     | 0.0498  | 0.0255 | 3.8141   | 0.0508 |
| <b>alc80_2</b>     | 0.0572  | 0.0247 | 5.3810   | 0.0204 |
| <b>alc80_3</b>     | 0.0464  | 0.0278 | 2.7753   | 0.0957 |
| <b>rpmeats80_1</b> | -0.0267 | 0.0423 | 0.3980   | 0.5281 |
| <b>rpmeats80_2</b> | -0.0207 | 0.0269 | 0.5887   | 0.4429 |
| <b>rpmeats80_3</b> | 0.0311  | 0.0232 | 1.8005   | 0.1797 |
| <b>rpmeats80_4</b> | 0.0274  | 0.0210 | 1.6945   | 0.1930 |
| <b>coff80_1</b>    | 0.00237 | 0.0222 | 0.0114   | 0.9150 |
| <b>coff80_2</b>    | 0.0286  | 0.0324 | 0.7812   | 0.3768 |
| <b>coff80_3</b>    | -0.0158 | 0.0510 | 0.0960   | 0.7566 |
| <b>whgrn80_1</b>   | 0.0161  | 0.0222 | 0.5298   | 0.4667 |
| <b>whgrn80_2</b>   | 0.00873 | 0.0236 | 0.1368   | 0.7115 |
| <b>soda80_1</b>    | -0.1116 | 0.0281 | 15.7853  | <.0001 |
| <b>soda80_2</b>    | -0.0771 | 0.0253 | 9.2968   | 0.0023 |
| <b>soda80_3</b>    | -0.0551 | 0.0255 | 4.6792   | 0.0305 |
| <b>soda80_4</b>    | -0.0225 | 0.0247 | 0.8267   | 0.3632 |
| <b>cig80_1</b>     | -0.1495 | 0.0593 | 6.3624   | 0.0117 |
| <b>cig80_2</b>     | -0.0976 | 0.0762 | 1.6403   | 0.2003 |
| <b>cig80_3</b>     | -0.1684 | 0.0653 | 6.6586   | 0.0099 |
| <b>cig80_4</b>     | -0.0508 | 0.0574 | 0.7819   | 0.3766 |
| <b>period_2</b>    | -1.2700 | 0.0965 | 173.3375 | <.0001 |
| <b>period_3</b>    | -1.5577 | 0.0776 | 402.9452 | <.0001 |
| <b>period_4</b>    | -1.5541 | 0.0538 | 834.9662 | <.0001 |
| <b>period_5</b>    | -1.3741 | 0.0976 | 198.3180 | <.0001 |
| <b>period_6</b>    | -1.2918 | 0.0417 | 957.7024 | <.0001 |

|                        |          |        |          |        |
|------------------------|----------|--------|----------|--------|
| <b>period_7</b>        | -0.8866  | 0.0780 | 129.1178 | <.0001 |
| <b>period_8</b>        | -0.2920  | 0.0322 | 82.0854  | <.0001 |
| <b>period_9</b>        | 0.0661   | 0.0765 | 0.7476   | 0.3872 |
| <b>period_10</b>       | 0.0128   | 0.0306 | 0.1769   | 0.6741 |
| <b>period_11</b>       | -0.0843  | 0.0769 | 1.2033   | 0.2727 |
| <b>mnp_12</b>          | 0.2673   | 0.0433 | 38.0928  | <.0001 |
| <b>mnp_11</b>          | 0.1888   | 0.0620 | 9.2873   | 0.0023 |
| <b>pmh_12</b>          | -0.1323  | 0.0241 | 30.0915  | <.0001 |
| <b>pmh_11</b>          | -0.4418  | 0.0280 | 249.5658 | <.0001 |
| <b>rpmeats_11_1</b>    | 0.0403   | 0.0407 | 0.9798   | 0.3223 |
| <b>rpmeats_11_1_ti</b> | -0.0399  | 0.0284 | 1.9689   | 0.1606 |
| <b>rpmeats_11_2</b>    | 0.0600   | 0.0381 | 2.4803   | 0.1153 |
| <b>rpmeats_11_2_ti</b> | -0.00851 | 0.0270 | 0.0993   | 0.7527 |
| <b>rpmeats_11_3</b>    | 0.0375   | 0.0381 | 0.9709   | 0.3245 |
| <b>rpmeats_11_3_ti</b> | -0.00940 | 0.0272 | 0.1196   | 0.7294 |
| <b>rpmeats_11_4</b>    | 0.0209   | 0.0373 | 0.3127   | 0.5760 |
| <b>rpmeats_11_4_ti</b> | 0.0152   | 0.0268 | 0.3212   | 0.5709 |
| <b>coff_11_1</b>       | 0.0182   | 0.0393 | 0.2149   | 0.6429 |
| <b>coff_11_1_ti</b>    | -0.00105 | 0.0258 | 0.0017   | 0.9676 |
| <b>coff_11_2</b>       | -0.0129  | 0.0429 | 0.0897   | 0.7646 |
| <b>coff_11_2_ti</b>    | 0.0335   | 0.0297 | 1.2729   | 0.2592 |
| <b>coff_11_3</b>       | 0.00359  | 0.0505 | 0.0051   | 0.9433 |
| <b>coff_11_3_ti</b>    | 0.00908  | 0.0358 | 0.0645   | 0.7996 |
| <b>coff_11_4</b>       | -0.0464  | 0.0260 | 3.1994   | 0.0737 |
| <b>coff_11_4_ti</b>    | 0.0203   | 0.0184 | 1.2262   | 0.2682 |
| <b>whgrn_11_1</b>      | -0.0256  | 0.0371 | 0.4755   | 0.4905 |
| <b>whgrn_11_1_ti</b>   | -0.0229  | 0.0259 | 0.7788   | 0.3775 |
| <b>whgrn_11_2</b>      | -0.00982 | 0.0349 | 0.0791   | 0.7786 |
| <b>whgrn_11_2_ti</b>   | -0.0355  | 0.0246 | 2.0841   | 0.1488 |
| <b>whgrn_11_3</b>      | 0.0102   | 0.0337 | 0.0914   | 0.7624 |
| <b>whgrn_11_3_ti</b>   | -0.0321  | 0.0237 | 1.8418   | 0.1747 |
| <b>whgrn_11_4</b>      | 0.0323   | 0.0325 | 0.9887   | 0.3200 |



|                      |          |        |         |        |
|----------------------|----------|--------|---------|--------|
| <b>whgrn_l1_4_ti</b> | -0.0202  | 0.0228 | 0.7820  | 0.3765 |
| <b>soda_l1_1</b>     | -0.0385  | 0.0401 | 0.9242  | 0.3364 |
| <b>soda_l1_1_ti</b>  | 0.000720 | 0.0232 | 0.0010  | 0.9753 |
| <b>soda_l1_2</b>     | -0.0380  | 0.0347 | 1.1987  | 0.2736 |
| <b>soda_l1_2_ti</b>  | 0.00236  | 0.0201 | 0.0138  | 0.9066 |
| <b>soda_l1_3</b>     | -0.0222  | 0.0350 | 0.4016  | 0.5263 |
| <b>soda_l1_3_ti</b>  | -0.00031 | 0.0206 | 0.0002  | 0.9880 |
| <b>soda_l1_4</b>     | -0.0716  | 0.0359 | 3.9873  | 0.0458 |
| <b>soda_l1_4_ti</b>  | 0.0125   | 0.0213 | 0.3439  | 0.5576 |
| <b>cal_l1_1</b>      | -0.1349  | 0.0397 | 11.5489 | 0.0007 |
| <b>cal_l1_1_ti</b>   | 0.0671   | 0.0281 | 5.7154  | 0.0168 |
| <b>cal_l1_2</b>      | -0.0827  | 0.0365 | 5.1327  | 0.0235 |
| <b>cal_l1_2_ti</b>   | 0.0297   | 0.0260 | 1.3050  | 0.2533 |
| <b>cal_l1_3</b>      | -0.0663  | 0.0350 | 3.5852  | 0.0583 |
| <b>cal_l1_3_ti</b>   | 0.0319   | 0.0249 | 1.6476  | 0.1993 |
| <b>cal_l1_4</b>      | -0.0139  | 0.0338 | 0.1697  | 0.6803 |
| <b>cal_l1_4_ti</b>   | 0.0236   | 0.0241 | 0.9659  | 0.3257 |
| <b>alc_l1_1</b>      | 0.1376   | 0.0338 | 16.5740 | <.0001 |
| <b>alc_l1_1_ti</b>   | -0.00672 | 0.0207 | 0.1060  | 0.7448 |
| <b>alc_l1_2</b>      | 0.1221   | 0.0346 | 12.4895 | 0.0004 |
| <b>alc_l1_2_ti</b>   | -0.0460  | 0.0230 | 3.9915  | 0.0457 |
| <b>alc_l1_3</b>      | 0.0109   | 0.0415 | 0.0691  | 0.7926 |
| <b>alc_l1_3_ti</b>   | -0.00412 | 0.0289 | 0.0203  | 0.8866 |
| <b>cig_l2_1</b>      | 0.0257   | 0.1143 | 0.0506  | 0.8220 |
| <b>cig_l1_1</b>      | -0.1605  | 0.1171 | 1.8782  | 0.1705 |
| <b>cig_l2_2</b>      | 0.00230  | 0.1299 | 0.0003  | 0.9859 |
| <b>cig_l1_2</b>      | -0.1377  | 0.1333 | 1.0680  | 0.3014 |
| <b>cig_l2_3</b>      | -0.0591  | 0.1152 | 0.2631  | 0.6080 |
| <b>cig_l1_3</b>      | -0.2185  | 0.1186 | 3.3925  | 0.0655 |
| <b>cig_l2_4</b>      | -0.0444  | 0.1040 | 0.1820  | 0.6697 |
| <b>cig_l1_4</b>      | -0.1914  | 0.1083 | 3.1264  | 0.0770 |
| <b>mvi_l2</b>        | 0.0880   | 0.0185 | 22.7455 | <.0001 |

|                    |         |        |         |        |
|--------------------|---------|--------|---------|--------|
| <b>mvi_l1</b>      | 0.0815  | 0.0188 | 18.7867 | <.0001 |
| <b>act_l1_1</b>    | 0.2156  | 0.0254 | 72.0866 | <.0001 |
| <b>act_l1_1_ti</b> | -0.0834 | 0.0351 | 5.6367  | 0.0176 |
| <b>act_l1_2</b>    | 0.1893  | 0.0291 | 42.2308 | <.0001 |
| <b>act_l1_2_ti</b> | -0.0760 | 0.0420 | 3.2760  | 0.0703 |
| <b>act_l1_3</b>    | 0.1447  | 0.0527 | 7.5235  | 0.0061 |
| <b>act_l1_3_ti</b> | -0.1903 | 0.1015 | 3.5141  | 0.0608 |
| <b>act_l1_4</b>    | 0.1443  | 0.0329 | 19.2063 | <.0001 |
| <b>act_l1_4_ti</b> | -0.0598 | 0.0425 | 1.9804  | 0.1594 |
| <b>act_l1_5</b>    | 0.1006  | 0.0546 | 3.3934  | 0.0655 |
| <b>act_l1_5_ti</b> | -0.0305 | 0.1007 | 0.0918  | 0.7619 |
| <b>can_l2</b>      | -0.0841 | 0.0591 | 2.0225  | 0.1550 |
| <b>can_l1</b>      | 0.0967  | 0.0531 | 3.3188  | 0.0685 |
| <b>bmi_l2_1</b>    | 0.6312  | 0.1194 | 27.9319 | <.0001 |
| <b>bmi_l1_1</b>    | 0.5443  | 0.1120 | 23.6041 | <.0001 |
| <b>bmi_l2_2</b>    | 0.3995  | 0.0845 | 22.3477 | <.0001 |
| <b>bmi_l1_2</b>    | 0.4620  | 0.0806 | 32.8840 | <.0001 |
| <b>bmi_l2_3</b>    | 0.2645  | 0.0797 | 10.9983 | 0.0009 |
| <b>bmi_l1_3</b>    | 0.3628  | 0.0762 | 22.6649 | <.0001 |
| <b>bmi_l2_4</b>    | 0.1722  | 0.0748 | 5.3008  | 0.0213 |
| <b>bmi_l1_4</b>    | 0.2680  | 0.0716 | 14.0224 | 0.0002 |
| <b>bmi_l2_5</b>    | 0.0582  | 0.0668 | 0.7586  | 0.3838 |
| <b>bmi_l1_5</b>    | 0.1087  | 0.0646 | 2.8325  | 0.0924 |
| <b>chl_l2</b>      | 0.0264  | 0.0353 | 0.5598  | 0.4543 |
| <b>chl_l1</b>      | 0.1534  | 0.0351 | 19.1234 | <.0001 |
| <b>hbp_l2</b>      | -0.0802 | 0.0375 | 4.5698  | 0.0325 |
| <b>hbp_l1</b>      | 0.0553  | 0.0369 | 2.2558  | 0.1331 |
| <b>sta_l1</b>      | 0.00430 | 0.0240 | 0.0320  | 0.8581 |
| <b>sta_l1_ti</b>   | -0.0220 | 0.0471 | 0.2185  | 0.6402 |
| <b>asn_l2_1</b>    | -0.0776 | 0.0243 | 10.2331 | 0.0014 |
| <b>asn_l1_1</b>    | 0.0150  | 0.0237 | 0.4005  | 0.5268 |
| <b>asn_l2_2</b>    | -0.1222 | 0.0236 | 26.7176 | <.0001 |

|                  |          |        |          |        |
|------------------|----------|--------|----------|--------|
| <b>asn_l1_2</b>  | -0.0527  | 0.0235 | 5.0289   | 0.0249 |
| <b>angcbg_l2</b> | -0.1733  | 0.0880 | 3.8810   | 0.0488 |
| <b>angcbg_l1</b> | 0.1910   | 0.0806 | 5.6202   | 0.0178 |
| <b>str_l2</b>    | 0.0479   | 0.1702 | 0.0793   | 0.7783 |
| <b>str_l1</b>    | -0.00280 | 0.1465 | 0.0004   | 0.9847 |
| <b>mi_l2</b>     | -0.1362  | 0.1860 | 0.5361   | 0.4641 |
| <b>mi_l1</b>     | -0.0180  | 0.1630 | 0.0122   | 0.9120 |
| <b>mnp</b>       | 0.4161   | 0.0618 | 45.3946  | <.0001 |
| <b>pmh</b>       | 0.3012   | 0.0244 | 152.7431 | <.0001 |

(F) Logistic model to estimate the probability of eating red meat

| <b>Parameter</b>     | <b>Log odds ratio</b> | <b>Standard error</b> | <b>Wald chi-square</b> | <b>P value</b> |
|----------------------|-----------------------|-----------------------|------------------------|----------------|
| <b>Intercept</b>     | 9.2780                | 0.5806                | 255.3988               | <.0001         |
| <b>fhx</b>           | -0.0231               | 0.0247                | 0.8734                 | 0.3500         |
| <b>smkhx</b>         | -0.0273               | 0.0222                | 1.5069                 | 0.2196         |
| <b>ochx</b>          | -0.00215              | 0.0211                | 0.0104                 | 0.9188         |
| <b>employed_1</b>    | -0.1539               | 0.0370                | 17.2563                | <.0001         |
| <b>employed_2</b>    | -0.1593               | 0.0648                | 6.0491                 | 0.0139         |
| <b>employed_3</b>    | -0.0537               | 0.0328                | 2.6769                 | 0.1018         |
| <b>employed_4</b>    | -0.0964               | 0.0407                | 5.6156                 | 0.0178         |
| <b>employed_5</b>    | -0.0927               | 0.0291                | 10.1443                | 0.0014         |
| <b>employed_6</b>    | -0.1156               | 0.0397                | 8.4720                 | 0.0036         |
| <b>employed_miss</b> | 0.1780                | 0.1305                | 1.8615                 | 0.1725         |
| <b>mar80</b>         | 0.1114                | 0.0316                | 12.3863                | 0.0004         |
| <b>college</b>       | -0.2111               | 0.0211                | 100.1699               | <.0001         |
| <b>stress82</b>      | -0.0187               | 0.0228                | 0.6717                 | 0.4125         |
| <b>stress82_miss</b> | -0.2090               | 0.1200                | 3.0336                 | 0.0816         |
| <b>hhighsch</b>      | 0.2370                | 0.0277                | 73.3196                | <.0001         |
| <b>hcollege</b>      | 0.1999                | 0.0291                | 47.1569                | <.0001         |
| <b>hgradsch</b>      | 0.0474                | 0.0286                | 2.7413                 | 0.0978         |

|                    |          |          |           |        |
|--------------------|----------|----------|-----------|--------|
| <b>lbmi18_2</b>    | -0.1147  | 0.0243   | 22.2412   | <.0001 |
| <b>lbmi18_3</b>    | -0.1068  | 0.0397   | 7.2449    | 0.0071 |
| <b>lbmi18_4</b>    | -0.1321  | 0.0895   | 2.1803    | 0.1398 |
| <b>baseage</b>     | -0.1497  | 0.0218   | 47.1842   | <.0001 |
| <b>baseage_sq</b>  | 0.00139  | 0.000212 | 43.0329   | <.0001 |
| <b>bmi80_1</b>     | 0.4279   | 0.1333   | 10.2994   | 0.0013 |
| <b>bmi80_2</b>     | 0.2804   | 0.1014   | 7.6422    | 0.0057 |
| <b>bmi80_3</b>     | 0.2599   | 0.0984   | 6.9810    | 0.0082 |
| <b>bmi80_4</b>     | 0.0865   | 0.0951   | 0.8266    | 0.3633 |
| <b>bmi80_5</b>     | -0.0891  | 0.0939   | 0.9014    | 0.3424 |
| <b>act80_1</b>     | 0.0399   | 0.0276   | 2.0926    | 0.1480 |
| <b>act80_2</b>     | 0.0303   | 0.0330   | 0.8430    | 0.3585 |
| <b>act80_3</b>     | 0.0708   | 0.0284   | 6.2237    | 0.0126 |
| <b>alc80_1</b>     | -0.0724  | 0.0327   | 4.9060    | 0.0268 |
| <b>alc80_2</b>     | 0.0669   | 0.0329   | 4.1291    | 0.0422 |
| <b>alc80_3</b>     | 0.1413   | 0.0388   | 13.2587   | 0.0003 |
| <b>rpmeats80_1</b> | -1.5667  | 0.0301   | 2711.2438 | <.0001 |
| <b>rpmeats80_2</b> | -0.4877  | 0.0283   | 297.4277  | <.0001 |
| <b>rpmeats80_3</b> | -0.1967  | 0.0312   | 39.8907   | <.0001 |
| <b>rpmeats80_4</b> | -0.2000  | 0.0289   | 47.8496   | <.0001 |
| <b>coff80_1</b>    | -0.0128  | 0.0263   | 0.2359    | 0.6272 |
| <b>coff80_2</b>    | 0.0265   | 0.0407   | 0.4253    | 0.5143 |
| <b>coff80_3</b>    | -0.0874  | 0.0607   | 2.0747    | 0.1498 |
| <b>whgrn80_1</b>   | 0.1140   | 0.0266   | 18.3795   | <.0001 |
| <b>whgrn80_2</b>   | 0.0643   | 0.0274   | 5.5297    | 0.0187 |
| <b>soda80_1</b>    | -0.0890  | 0.0354   | 6.3272    | 0.0119 |
| <b>soda80_2</b>    | -0.00781 | 0.0338   | 0.0533    | 0.8175 |
| <b>soda80_3</b>    | 0.0442   | 0.0354   | 1.5548    | 0.2124 |
| <b>soda80_4</b>    | 0.0364   | 0.0344   | 1.1171    | 0.2905 |
| <b>cig80_1</b>     | 0.1999   | 0.0943   | 4.4935    | 0.0340 |
| <b>cig80_2</b>     | 0.1048   | 0.1132   | 0.8583    | 0.3542 |
| <b>cig80_3</b>     | 0.2702   | 0.1028   | 6.9072    | 0.0086 |

|                        |         |        |          |        |
|------------------------|---------|--------|----------|--------|
| <b>cig80_4</b>         | 0.0812  | 0.0939 | 0.7472   | 0.3873 |
| <b>period_2</b>        | 0.8110  | 0.2201 | 13.5816  | 0.0002 |
| <b>period_4</b>        | 0.2991  | 0.0657 | 20.6950  | <.0001 |
| <b>period_6</b>        | 0.0965  | 0.0390 | 6.1334   | 0.0133 |
| <b>period_8</b>        | -0.3995 | 0.0333 | 143.8183 | <.0001 |
| <b>period_10</b>       | -0.0917 | 0.0309 | 8.8306   | 0.0030 |
| <b>mnp_l2</b>          | 0.0902  | 0.0503 | 3.2079   | 0.0733 |
| <b>mnp_l1</b>          | 0.0633  | 0.0687 | 0.8513   | 0.3562 |
| <b>pmh_l2</b>          | 0.0928  | 0.0300 | 9.5554   | 0.0020 |
| <b>pmh_l1</b>          | 0.0342  | 0.0352 | 0.9463   | 0.3307 |
| <b>ost_l2</b>          | 0.0124  | 0.0546 | 0.0516   | 0.8203 |
| <b>ost_l1</b>          | 0.0185  | 0.0673 | 0.0752   | 0.7839 |
| <b>rpmeats_l1_1</b>    | -3.4175 | 0.1551 | 485.4001 | <.0001 |
| <b>rpmeats_l1_1_ti</b> | 0.0169  | 0.0861 | 0.0384   | 0.8446 |
| <b>rpmeats_l1_2</b>    | -1.3087 | 0.1719 | 57.9570  | <.0001 |
| <b>rpmeats_l1_2_ti</b> | -0.0625 | 0.0945 | 0.4375   | 0.5083 |
| <b>rpmeats_l1_3</b>    | -0.4984 | 0.2032 | 6.0126   | 0.0142 |
| <b>rpmeats_l1_3_ti</b> | -0.0990 | 0.1103 | 0.8057   | 0.3694 |
| <b>rpmeats_l1_4</b>    | -0.1369 | 0.2048 | 0.4472   | 0.5037 |
| <b>rpmeats_l1_4_ti</b> | -0.1199 | 0.1121 | 1.1442   | 0.2848 |
| <b>coff_l1_1</b>       | -0.6036 | 0.0985 | 37.5836  | <.0001 |
| <b>coff_l1_1_ti</b>    | 0.1383  | 0.0508 | 7.4265   | 0.0064 |
| <b>coff_l1_2</b>       | -0.2955 | 0.1269 | 5.4275   | 0.0198 |
| <b>coff_l1_2_ti</b>    | 0.0463  | 0.0658 | 0.4961   | 0.4812 |
| <b>coff_l1_3</b>       | 0.0162  | 0.1681 | 0.0093   | 0.9231 |
| <b>coff_l1_3_ti</b>    | -0.0651 | 0.0872 | 0.5584   | 0.4549 |
| <b>coff_l1_4</b>       | -0.0853 | 0.0849 | 1.0107   | 0.3147 |
| <b>coff_l1_4_ti</b>    | 0.00685 | 0.0444 | 0.0237   | 0.8775 |
| <b>whgrn_l1_1</b>      | 0.6252  | 0.1057 | 34.9781  | <.0001 |
| <b>whgrn_l1_1_ti</b>   | -0.0649 | 0.0555 | 1.3687   | 0.2420 |
| <b>whgrn_l1_2</b>      | 0.6005  | 0.1062 | 31.9604  | <.0001 |
| <b>whgrn_l1_2_ti</b>   | -0.0758 | 0.0555 | 1.8660   | 0.1719 |

|                      |          |        |         |        |
|----------------------|----------|--------|---------|--------|
| <b>whgrn_l1_3</b>    | 0.4661   | 0.1077 | 18.7202 | <.0001 |
| <b>whgrn_l1_3_ti</b> | -0.0225  | 0.0560 | 0.1610  | 0.6882 |
| <b>whgrn_l1_4</b>    | 0.4071   | 0.1016 | 16.0656 | <.0001 |
| <b>whgrn_l1_4_ti</b> | -0.0867  | 0.0527 | 2.7093  | 0.0998 |
| <b>soda_l1_1</b>     | -0.3233  | 0.0801 | 16.2969 | <.0001 |
| <b>soda_l1_1_ti</b>  | -0.00747 | 0.0343 | 0.0476  | 0.8274 |
| <b>soda_l1_2</b>     | -0.0786  | 0.0783 | 1.0084  | 0.3153 |
| <b>soda_l1_2_ti</b>  | 0.00600  | 0.0337 | 0.0316  | 0.8588 |
| <b>soda_l1_3</b>     | 0.00354  | 0.0841 | 0.0018  | 0.9664 |
| <b>soda_l1_3_ti</b>  | 0.0108   | 0.0365 | 0.0881  | 0.7666 |
| <b>soda_l1_4</b>     | 0.0752   | 0.0871 | 0.7458  | 0.3878 |
| <b>soda_l1_4_ti</b>  | -0.0396  | 0.0377 | 1.1071  | 0.2927 |
| <b>cal_l1_1</b>      | -0.1022  | 0.1305 | 0.6133  | 0.4335 |
| <b>cal_l1_1_ti</b>   | -0.00354 | 0.0679 | 0.0027  | 0.9584 |
| <b>cal_l1_2</b>      | -0.1039  | 0.1313 | 0.6259  | 0.4288 |
| <b>cal_l1_2_ti</b>   | 0.0702   | 0.0683 | 1.0574  | 0.3038 |
| <b>cal_l1_3</b>      | 0.1024   | 0.1372 | 0.5567  | 0.4556 |
| <b>cal_l1_3_ti</b>   | 0.0225   | 0.0713 | 0.0998  | 0.7521 |
| <b>cal_l1_4</b>      | 0.0383   | 0.1416 | 0.0732  | 0.7867 |
| <b>cal_l1_4_ti</b>   | 0.0144   | 0.0735 | 0.0383  | 0.8449 |
| <b>alc_l1_1</b>      | -0.4707  | 0.0997 | 22.2772 | <.0001 |
| <b>alc_l1_1_ti</b>   | 0.0309   | 0.0507 | 0.3723  | 0.5417 |
| <b>alc_l1_2</b>      | -0.1733  | 0.1098 | 2.4923  | 0.1144 |
| <b>alc_l1_2_ti</b>   | -0.0154  | 0.0567 | 0.0741  | 0.7854 |
| <b>alc_l1_3</b>      | -0.0585  | 0.1408 | 0.1728  | 0.6776 |
| <b>alc_l1_3_ti</b>   | -0.0265  | 0.0732 | 0.1309  | 0.7175 |
| <b>cig_l2_1</b>      | 0.1538   | 0.1852 | 0.6895  | 0.4064 |
| <b>cig_l1_1</b>      | -0.3274  | 0.2044 | 2.5649  | 0.1093 |
| <b>cig_l2_2</b>      | 0.2366   | 0.2072 | 1.3041  | 0.2535 |
| <b>cig_l1_2</b>      | -0.2540  | 0.2246 | 1.2792  | 0.2581 |
| <b>cig_l2_3</b>      | 0.1587   | 0.1892 | 0.7032  | 0.4017 |
| <b>cig_l1_3</b>      | 0.0297   | 0.2093 | 0.0202  | 0.8871 |

|                    |          |        |         |        |
|--------------------|----------|--------|---------|--------|
| <b>cig_l2_4</b>    | 0.2687   | 0.1740 | 2.3839  | 0.1226 |
| <b>cig_l1_4</b>    | -0.0195  | 0.1954 | 0.0100  | 0.9205 |
| <b>mvi_l2</b>      | -0.0340  | 0.0230 | 2.1894  | 0.1390 |
| <b>mvi_l1</b>      | -0.0291  | 0.0236 | 1.5225  | 0.2172 |
| <b>act_l1_1</b>    | 0.2529   | 0.0281 | 80.9788 | <.0001 |
| <b>act_l1_1_ti</b> | -0.0528  | 0.0469 | 1.2687  | 0.2600 |
| <b>act_l1_2</b>    | 0.1813   | 0.0329 | 30.4248 | <.0001 |
| <b>act_l1_2_ti</b> | -0.0534  | 0.0579 | 0.8481  | 0.3571 |
| <b>act_l1_3</b>    | 0.1602   | 0.0616 | 6.7715  | 0.0093 |
| <b>act_l1_3_ti</b> | -0.3637  | 0.1935 | 3.5323  | 0.0602 |
| <b>act_l1_4</b>    | 0.0743   | 0.0359 | 4.2682  | 0.0388 |
| <b>act_l1_4_ti</b> | -0.0367  | 0.0501 | 0.5386  | 0.4630 |
| <b>act_l1_5</b>    | 0.1426   | 0.0604 | 5.5680  | 0.0183 |
| <b>act_l1_5_ti</b> | 0.4604   | 0.5849 | 0.6196  | 0.4312 |
| <b>can_l2</b>      | 0.1113   | 0.0807 | 1.9001  | 0.1681 |
| <b>can_l1</b>      | -0.0246  | 0.0729 | 0.1142  | 0.7355 |
| <b>bmi_l2_1</b>    | 0.0686   | 0.1513 | 0.2053  | 0.6505 |
| <b>bmi_l1_1</b>    | -1.2888  | 0.1392 | 85.7789 | <.0001 |
| <b>bmi_l2_2</b>    | 0.0379   | 0.1099 | 0.1190  | 0.7301 |
| <b>bmi_l1_2</b>    | -0.9363  | 0.1056 | 78.5603 | <.0001 |
| <b>bmi_l2_3</b>    | 0.0606   | 0.1043 | 0.3380  | 0.5610 |
| <b>bmi_l1_3</b>    | -0.7011  | 0.1007 | 48.4765 | <.0001 |
| <b>bmi_l2_4</b>    | 0.0982   | 0.0982 | 0.9986  | 0.3177 |
| <b>bmi_l1_4</b>    | -0.4503  | 0.0954 | 22.2893 | <.0001 |
| <b>bmi_l2_5</b>    | 0.1346   | 0.0889 | 2.2915  | 0.1301 |
| <b>bmi_l1_5</b>    | -0.2675  | 0.0874 | 9.3588  | 0.0022 |
| <b>chl_l2</b>      | 0.1447   | 0.0453 | 10.2049 | 0.0014 |
| <b>chl_l1</b>      | -0.1791  | 0.0445 | 16.1593 | <.0001 |
| <b>hbp_l2</b>      | -0.00344 | 0.0511 | 0.0045  | 0.9463 |
| <b>hbp_l1</b>      | 0.0151   | 0.0501 | 0.0902  | 0.7639 |
| <b>sta_l1</b>      | -0.0658  | 0.0314 | 4.4004  | 0.0359 |
| <b>sta_l1_ti</b>   | 0.0586   | 0.0383 | 2.3367  | 0.1264 |

|                  |         |        |         |        |
|------------------|---------|--------|---------|--------|
| <b>asn_l2_1</b>  | -0.0214 | 0.0302 | 0.5016  | 0.4788 |
| <b>asn_l1_1</b>  | -0.0176 | 0.0306 | 0.3291  | 0.5662 |
| <b>asn_l2_2</b>  | 0.0962  | 0.0310 | 9.6424  | 0.0019 |
| <b>asn_l1_2</b>  | 0.0375  | 0.0305 | 1.5179  | 0.2179 |
| <b>angcbg_l2</b> | 0.3900  | 0.1167 | 11.1724 | 0.0008 |
| <b>angcbg_l1</b> | -0.4278 | 0.1089 | 15.4325 | <.0001 |
| <b>str_l2</b>    | -0.1143 | 0.2366 | 0.2332  | 0.6291 |
| <b>str_l1</b>    | 0.2129  | 0.2069 | 1.0586  | 0.3035 |
| <b>mi_l2</b>     | 0.0328  | 0.2369 | 0.0192  | 0.8897 |
| <b>mi_l1</b>     | -0.1632 | 0.2159 | 0.5711  | 0.4498 |
| <b>mnp</b>       | 0.1105  | 0.0606 | 3.3263  | 0.0682 |
| <b>pmh</b>       | 0.0712  | 0.0313 | 5.1916  | 0.0227 |
| <b>ost</b>       | -0.0425 | 0.0484 | 0.7705  | 0.3800 |

(G) Log-linear model to estimate the amount of red meat intake among women who eat red meat

| <b>Variable</b>      | <b>Parameter estimate</b> | <b>Standard error</b> | <b>t value</b> | <b>P value</b> |
|----------------------|---------------------------|-----------------------|----------------|----------------|
| <b>Intercept</b>     | 0.98322                   | 0.05741               | 17.13          | <.0001         |
| <b>fhx</b>           | -0.00502                  | 0.00264               | -1.90          | 0.0570         |
| <b>smkhx</b>         | -0.02107                  | 0.00248               | -8.51          | <.0001         |
| <b>ochx</b>          | 0.00600                   | 0.00226               | 2.65           | 0.0080         |
| <b>employed_1</b>    | -0.00815                  | 0.00419               | -1.94          | 0.0518         |
| <b>employed_2</b>    | -0.00812                  | 0.00663               | -1.22          | 0.2208         |
| <b>employed_3</b>    | -0.00208                  | 0.00336               | -0.62          | 0.5353         |
| <b>employed_4</b>    | -0.01526                  | 0.00439               | -3.47          | 0.0005         |
| <b>employed_5</b>    | -0.01502                  | 0.00312               | -4.82          | <.0001         |
| <b>employed_6</b>    | -0.01765                  | 0.00464               | -3.80          | 0.0001         |
| <b>employed_miss</b> | 0.03287                   | 0.01490               | 2.21           | 0.0274         |
| <b>mar80</b>         | 0.04101                   | 0.00399               | 10.27          | <.0001         |
| <b>college</b>       | -0.02695                  | 0.00241               | -11.20         | <.0001         |



|                      |            |            |        |        |
|----------------------|------------|------------|--------|--------|
| <b>stress82</b>      | 0.00438    | 0.00250    | 1.75   | 0.0796 |
| <b>stress82_miss</b> | -0.00419   | 0.01382    | -0.30  | 0.7617 |
| <b>hhhighsch</b>     | 0.02708    | 0.00289    | 9.36   | <.0001 |
| <b>hcollege</b>      | 0.00512    | 0.00315    | 1.63   | 0.1036 |
| <b>hgradsch</b>      | -0.02018   | 0.00335    | -6.03  | <.0001 |
| <b>lbmi18_2</b>      | -0.02424   | 0.00265    | -9.15  | <.0001 |
| <b>lbmi18_3</b>      | -0.02959   | 0.00424    | -6.99  | <.0001 |
| <b>lbmi18_4</b>      | -0.05265   | 0.01002    | -5.25  | <.0001 |
| <b>baseage</b>       | -0.01989   | 0.00224    | -8.89  | <.0001 |
| <b>baseage_sq</b>    | 0.00012731 | 0.00002211 | 5.76   | <.0001 |
| <b>bmi80_1</b>       | -0.01577   | 0.01516    | -1.04  | 0.2982 |
| <b>bmi80_2</b>       | 0.00363    | 0.01002    | 0.36   | 0.7170 |
| <b>bmi80_3</b>       | -0.00464   | 0.00952    | -0.49  | 0.6263 |
| <b>bmi80_4</b>       | -0.00407   | 0.00903    | -0.45  | 0.6517 |
| <b>bmi80_5</b>       | -0.01479   | 0.00868    | -1.70  | 0.0884 |
| <b>act80_1</b>       | -0.00783   | 0.00328    | -2.38  | 0.0171 |
| <b>act80_2</b>       | 0.00086190 | 0.00387    | 0.22   | 0.8237 |
| <b>act80_3</b>       | 0.00096106 | 0.00341    | 0.28   | 0.7780 |
| <b>alc80_1</b>       | -0.02379   | 0.00367    | -6.48  | <.0001 |
| <b>alc80_2</b>       | -0.01630   | 0.00348    | -4.68  | <.0001 |
| <b>alc80_3</b>       | -0.00992   | 0.00384    | -2.58  | 0.0098 |
| <b>rpmeats80_1</b>   | -0.36279   | 0.00697    | -52.02 | <.0001 |
| <b>rpmeats80_2</b>   | -0.22054   | 0.00384    | -57.40 | <.0001 |
| <b>rpmeats80_3</b>   | -0.12497   | 0.00321    | -38.98 | <.0001 |
| <b>rpmeats80_4</b>   | -0.09591   | 0.00288    | -33.29 | <.0001 |
| <b>coff80_1</b>      | -0.02109   | 0.00312    | -6.76  | <.0001 |
| <b>coff80_2</b>      | -0.01236   | 0.00441    | -2.80  | 0.0051 |
| <b>coff80_3</b>      | -0.01698   | 0.00686    | -2.48  | 0.0132 |
| <b>whgrn80_1</b>     | 0.01149    | 0.00313    | 3.67   | 0.0002 |
| <b>whgrn80_2</b>     | -0.00871   | 0.00333    | -2.61  | 0.0090 |
| <b>soda80_1</b>      | -0.02861   | 0.00400    | -7.15  | <.0001 |
| <b>soda80_2</b>      | -0.01343   | 0.00350    | -3.84  | 0.0001 |

|                        |             |         |         |        |
|------------------------|-------------|---------|---------|--------|
| <b>soda80_3</b>        | -0.00558    | 0.00344 | -1.62   | 0.1044 |
| <b>soda80_4</b>        | -0.01131    | 0.00329 | -3.44   | 0.0006 |
| <b>cig80_1</b>         | -0.04197    | 0.00909 | -4.62   | <.0001 |
| <b>cig80_2</b>         | -0.02916    | 0.01134 | -2.57   | 0.0101 |
| <b>cig80_3</b>         | -0.03559    | 0.00989 | -3.60   | 0.0003 |
| <b>cig80_4</b>         | -0.02705    | 0.00875 | -3.09   | 0.0020 |
| <b>period_2</b>        | 0.22962     | 0.01275 | 18.02   | <.0001 |
| <b>period_4</b>        | 0.12522     | 0.00577 | 21.72   | <.0001 |
| <b>period_6</b>        | 0.08939     | 0.00460 | 19.45   | <.0001 |
| <b>period_8</b>        | -0.06810    | 0.00429 | -15.89  | <.0001 |
| <b>period_10</b>       | 0.02216     | 0.00405 | 5.47    | <.0001 |
| <b>mnp_l2</b>          | 0.02042     | 0.00480 | 4.25    | <.0001 |
| <b>mnp_l1</b>          | 0.01572     | 0.00629 | 2.50    | 0.0125 |
| <b>pmh_l2</b>          | 0.01010     | 0.00344 | 2.94    | 0.0033 |
| <b>pmh_l1</b>          | 0.01262     | 0.00393 | 3.21    | 0.0013 |
| <b>ost_l2</b>          | 0.00821     | 0.00709 | 1.16    | 0.2466 |
| <b>ost_l1</b>          | 0.00720     | 0.00859 | 0.84    | 0.4021 |
| <b>rpmeats_l1_1</b>    | -1.18334    | 0.01045 | -113.28 | <.0001 |
| <b>rpmeats_l1_1_ti</b> | 0.01250     | 0.00561 | 2.23    | 0.0257 |
| <b>rpmeats_l1_2</b>    | -0.69067    | 0.00762 | -90.67  | <.0001 |
| <b>rpmeats_l1_2_ti</b> | 0.00007331  | 0.00426 | 0.02    | 0.9863 |
| <b>rpmeats_l1_3</b>    | -0.43530    | 0.00714 | -60.94  | <.0001 |
| <b>rpmeats_l1_3_ti</b> | -0.00056242 | 0.00404 | -0.14   | 0.8893 |
| <b>rpmeats_l1_4</b>    | -0.26761    | 0.00612 | -43.70  | <.0001 |
| <b>rpmeats_l1_4_ti</b> | 0.00427     | 0.00357 | 1.19    | 0.2323 |
| <b>coff_l1_1</b>       | 0.00933     | 0.00794 | 1.18    | 0.2399 |
| <b>coff_l1_1_ti</b>    | -0.00760    | 0.00424 | -1.80   | 0.0726 |
| <b>coff_l1_2</b>       | -0.01140    | 0.01014 | -1.12   | 0.2610 |
| <b>coff_l1_2_ti</b>    | -0.01056    | 0.00552 | -1.91   | 0.0556 |
| <b>coff_l1_3</b>       | 0.00054295  | 0.01173 | 0.05    | 0.9631 |
| <b>coff_l1_3_ti</b>    | -0.00594    | 0.00648 | -0.92   | 0.3586 |
| <b>coff_l1_4</b>       | -0.00297    | 0.00519 | -0.57   | 0.5675 |

|                      |          |         |        |        |
|----------------------|----------|---------|--------|--------|
| <b>coff_l1_4_ti</b>  | -0.00310 | 0.00292 | -1.06  | 0.2897 |
| <b>whgrn_l1_1</b>    | 0.10364  | 0.00798 | 12.98  | <.0001 |
| <b>whgrn_l1_1_ti</b> | -0.01391 | 0.00442 | -3.15  | 0.0016 |
| <b>whgrn_l1_2</b>    | 0.08282  | 0.00801 | 10.34  | <.0001 |
| <b>whgrn_l1_2_ti</b> | -0.01232 | 0.00441 | -2.79  | 0.0052 |
| <b>whgrn_l1_3</b>    | 0.05512  | 0.00837 | 6.58   | <.0001 |
| <b>whgrn_l1_3_ti</b> | -0.00530 | 0.00456 | -1.16  | 0.2454 |
| <b>whgrn_l1_4</b>    | 0.03745  | 0.00859 | 4.36   | <.0001 |
| <b>whgrn_l1_4_ti</b> | -0.00442 | 0.00466 | -0.95  | 0.3428 |
| <b>soda_l1_1</b>     | -0.03997 | 0.00738 | -5.42  | <.0001 |
| <b>soda_l1_1_ti</b>  | -0.00104 | 0.00306 | -0.34  | 0.7341 |
| <b>soda_l1_2</b>     | -0.00143 | 0.00592 | -0.24  | 0.8095 |
| <b>soda_l1_2_ti</b>  | -0.00688 | 0.00244 | -2.82  | 0.0048 |
| <b>soda_l1_3</b>     | 0.00592  | 0.00578 | 1.02   | 0.3058 |
| <b>soda_l1_3_ti</b>  | -0.00434 | 0.00241 | -1.80  | 0.0723 |
| <b>soda_l1_4</b>     | 0.00212  | 0.00583 | 0.36   | 0.7161 |
| <b>soda_l1_4_ti</b>  | -0.00414 | 0.00247 | -1.68  | 0.0937 |
| <b>cal_l1_1</b>      | -0.21148 | 0.00852 | -24.83 | <.0001 |
| <b>cal_l1_1_ti</b>   | 0.02045  | 0.00477 | 4.29   | <.0001 |
| <b>cal_l1_2</b>      | -0.16418 | 0.00778 | -21.10 | <.0001 |
| <b>cal_l1_2_ti</b>   | 0.01776  | 0.00435 | 4.08   | <.0001 |
| <b>cal_l1_3</b>      | -0.14440 | 0.00747 | -19.33 | <.0001 |
| <b>cal_l1_3_ti</b>   | 0.02803  | 0.00418 | 6.71   | <.0001 |
| <b>cal_l1_4</b>      | -0.09121 | 0.00724 | -12.60 | <.0001 |
| <b>cal_l1_4_ti</b>   | 0.01341  | 0.00405 | 3.31   | 0.0009 |
| <b>alc_l1_1</b>      | 0.01580  | 0.00673 | 2.35   | 0.0189 |
| <b>alc_l1_1_ti</b>   | -0.03035 | 0.00343 | -8.84  | <.0001 |
| <b>alc_l1_2</b>      | 0.00642  | 0.00675 | 0.95   | 0.3420 |
| <b>alc_l1_2_ti</b>   | -0.01760 | 0.00362 | -4.86  | <.0001 |
| <b>alc_l1_3</b>      | 0.00205  | 0.00816 | 0.25   | 0.8016 |
| <b>alc_l1_3_ti</b>   | -0.01417 | 0.00455 | -3.12  | 0.0018 |
| <b>cig_l2_1</b>      | -0.01903 | 0.01419 | -1.34  | 0.1800 |

|                    |             |         |        |        |
|--------------------|-------------|---------|--------|--------|
| <b>cig_l1_1</b>    | -0.06726    | 0.01398 | -4.81  | <.0001 |
| <b>cig_l2_2</b>    | -0.00888    | 0.01654 | -0.54  | 0.5916 |
| <b>cig_l1_2</b>    | -0.05094    | 0.01628 | -3.13  | 0.0017 |
| <b>cig_l2_3</b>    | -0.01171    | 0.01452 | -0.81  | 0.4200 |
| <b>cig_l1_3</b>    | -0.03867    | 0.01429 | -2.71  | 0.0068 |
| <b>cig_l2_4</b>    | 0.00029886  | 0.01283 | 0.02   | 0.9814 |
| <b>cig_l1_4</b>    | -0.01132    | 0.01281 | -0.88  | 0.3771 |
| <b>mvi_l2</b>      | -0.00655    | 0.00233 | -2.81  | 0.0050 |
| <b>mvi_l1</b>      | -0.01938    | 0.00238 | -8.13  | <.0001 |
| <b>act_l1_1</b>    | 0.06566     | 0.00356 | 18.44  | <.0001 |
| <b>act_l1_1_ti</b> | -0.02246    | 0.00383 | -5.86  | <.0001 |
| <b>act_l1_2</b>    | 0.04519     | 0.00408 | 11.07  | <.0001 |
| <b>act_l1_2_ti</b> | -0.01315    | 0.00467 | -2.82  | 0.0048 |
| <b>act_l1_3</b>    | 0.02586     | 0.00715 | 3.62   | 0.0003 |
| <b>act_l1_3_ti</b> | 0.01445     | 0.01569 | 0.92   | 0.3572 |
| <b>act_l1_4</b>    | 0.02457     | 0.00464 | 5.29   | <.0001 |
| <b>act_l1_4_ti</b> | -0.00968    | 0.00435 | -2.22  | 0.0262 |
| <b>act_l1_5</b>    | 0.00808     | 0.00751 | 1.08   | 0.2821 |
| <b>act_l1_5_ti</b> | -0.03490    | 0.02625 | -1.33  | 0.1838 |
| <b>can_l2</b>      | 0.00743     | 0.00995 | 0.75   | 0.4552 |
| <b>can_l1</b>      | -0.00084429 | 0.00888 | -0.10  | 0.9242 |
| <b>bmi_l2_1</b>    | 0.00713     | 0.01848 | 0.39   | 0.6997 |
| <b>bmi_l1_1</b>    | -0.14949    | 0.01667 | -8.97  | <.0001 |
| <b>bmi_l2_2</b>    | -0.01016    | 0.01107 | -0.92  | 0.3587 |
| <b>bmi_l1_2</b>    | -0.15531    | 0.01012 | -15.34 | <.0001 |
| <b>bmi_l2_3</b>    | -0.00301    | 0.01024 | -0.29  | 0.7689 |
| <b>bmi_l1_3</b>    | -0.12620    | 0.00941 | -13.42 | <.0001 |
| <b>bmi_l2_4</b>    | 0.00442     | 0.00945 | 0.47   | 0.6403 |
| <b>bmi_l1_4</b>    | -0.08629    | 0.00871 | -9.90  | <.0001 |
| <b>bmi_l2_5</b>    | -0.00880    | 0.00833 | -1.06  | 0.2908 |
| <b>bmi_l1_5</b>    | -0.03621    | 0.00778 | -4.66  | <.0001 |
| <b>chl_l2</b>      | 0.03081     | 0.00483 | 6.38   | <.0001 |

|                  |             |         |        |        |
|------------------|-------------|---------|--------|--------|
| <b>chl_l1</b>    | -0.05814    | 0.00460 | -12.65 | <.0001 |
| <b>hbp_l2</b>    | 0.02163     | 0.00552 | 3.92   | <.0001 |
| <b>hbp_l1</b>    | -0.01344    | 0.00537 | -2.50  | 0.0124 |
| <b>sta_l1</b>    | -0.02122    | 0.00413 | -5.13  | <.0001 |
| <b>sta_l1_ti</b> | 0.00519     | 0.00463 | 1.12   | 0.2622 |
| <b>asn_l2_1</b>  | -0.00698    | 0.00345 | -2.03  | 0.0428 |
| <b>asn_l1_1</b>  | -0.00050892 | 0.00353 | -0.14  | 0.8852 |
| <b>asn_l2_2</b>  | 0.00391     | 0.00340 | 1.15   | 0.2494 |
| <b>asn_l1_2</b>  | 0.01111     | 0.00338 | 3.29   | 0.0010 |
| <b>angcbg_l2</b> | 0.05298     | 0.01561 | 3.39   | 0.0007 |
| <b>angcbg_l1</b> | -0.05501    | 0.01449 | -3.80  | 0.0001 |
| <b>str_l2</b>    | 0.03028     | 0.02998 | 1.01   | 0.3125 |
| <b>str_l1</b>    | -0.04085    | 0.02556 | -1.60  | 0.1101 |
| <b>mi_l2</b>     | 0.15061     | 0.03303 | 4.56   | <.0001 |
| <b>mi_l1</b>     | -0.16053    | 0.02926 | -5.49  | <.0001 |
| <b>mnp</b>       | 0.00155     | 0.00529 | 0.29   | 0.7689 |
| <b>pmh</b>       | -0.00184    | 0.00340 | -0.54  | 0.5884 |
| <b>ost</b>       | -0.01341    | 0.00606 | -2.21  | 0.0269 |

(H) Logistic model to estimate the probability of coffee intake

| <b>Variable</b>   | <b>Log odds ratio</b> | <b>Standard error</b> | <b>Wald chi-square</b> | <b>P value</b> |
|-------------------|-----------------------|-----------------------|------------------------|----------------|
| <b>Intercept</b>  | 4.0896                | 0.4556                | 80.5562                | <.0001         |
| <b>fhx</b>        | 0.0176                | 0.0212                | 0.6911                 | 0.4058         |
| <b>smkhx</b>      | 0.1109                | 0.0197                | 31.5631                | <.0001         |
| <b>ochx</b>       | -0.0212               | 0.0182                | 1.3484                 | 0.2456         |
| <b>employed_1</b> | -0.0281               | 0.0335                | 0.7023                 | 0.4020         |
| <b>employed_2</b> | -0.1088               | 0.0543                | 4.0165                 | 0.0451         |
| <b>employed_3</b> | -0.0221               | 0.0266                | 0.6923                 | 0.4054         |
| <b>employed_4</b> | -0.00992              | 0.0357                | 0.0772                 | 0.7811         |
| <b>employed_5</b> | -0.0386               | 0.0244                | 2.5139                 | 0.1128         |
| <b>employed_6</b> | -0.0186               | 0.0361                | 0.2659                 | 0.6061         |

|                      |          |          |           |        |
|----------------------|----------|----------|-----------|--------|
| <b>employed_miss</b> | 0.0441   | 0.1188   | 0.1376    | 0.7107 |
| <b>mar80</b>         | 0.0272   | 0.0327   | 0.6901    | 0.4061 |
| <b>college</b>       | 0.00895  | 0.0192   | 0.2166    | 0.6417 |
| <b>stress82</b>      | 0.0229   | 0.0198   | 1.3414    | 0.2468 |
| <b>stress82_miss</b> | -0.0393  | 0.1098   | 0.1280    | 0.7205 |
| <b>hhighsch</b>      | -0.0581  | 0.0232   | 6.2709    | 0.0123 |
| <b>hcollege</b>      | 0.00186  | 0.0254   | 0.0054    | 0.9414 |
| <b>hgradsch</b>      | -0.0206  | 0.0265   | 0.6010    | 0.4382 |
| <b>lbmi18_2</b>      | 0.0142   | 0.0217   | 0.4274    | 0.5133 |
| <b>lbmi18_3</b>      | 0.0165   | 0.0352   | 0.2203    | 0.6388 |
| <b>lbmi18_4</b>      | 0.0184   | 0.0813   | 0.0513    | 0.8208 |
| <b>baseage</b>       | 0.0146   | 0.0176   | 0.6873    | 0.4071 |
| <b>baseage_sq</b>    | -0.00015 | 0.000174 | 0.7819    | 0.3766 |
| <b>bmi80_1</b>       | 0.1394   | 0.1145   | 1.4841    | 0.2231 |
| <b>bmi80_2</b>       | 0.00678  | 0.0741   | 0.0084    | 0.9270 |
| <b>bmi80_3</b>       | -0.00129 | 0.0699   | 0.0003    | 0.9853 |
| <b>bmi80_4</b>       | -0.0248  | 0.0656   | 0.1425    | 0.7058 |
| <b>bmi80_5</b>       | -0.0503  | 0.0625   | 0.6477    | 0.4209 |
| <b>act80_1</b>       | 0.0447   | 0.0258   | 2.9885    | 0.0839 |
| <b>act80_2</b>       | 0.0360   | 0.0305   | 1.3894    | 0.2385 |
| <b>act80_3</b>       | 0.0168   | 0.0269   | 0.3905    | 0.5320 |
| <b>alc80_1</b>       | -0.0476  | 0.0310   | 2.3604    | 0.1244 |
| <b>alc80_2</b>       | 0.0497   | 0.0307   | 2.6238    | 0.1053 |
| <b>alc80_3</b>       | 0.1210   | 0.0356   | 11.5320   | 0.0007 |
| <b>rpmeats80_1</b>   | 0.0896   | 0.0434   | 4.2646    | 0.0389 |
| <b>rpmeats80_2</b>   | 0.0407   | 0.0296   | 1.8933    | 0.1688 |
| <b>rpmeats80_3</b>   | 0.0610   | 0.0264   | 5.3306    | 0.0210 |
| <b>rpmeats80_4</b>   | 0.0352   | 0.0234   | 2.2594    | 0.1328 |
| <b>coff80_1</b>      | -1.3069  | 0.0195   | 4477.6646 | <.0001 |
| <b>coff80_2</b>      | -0.2497  | 0.0336   | 55.1539   | <.0001 |
| <b>coff80_3</b>      | -0.1977  | 0.0573   | 11.9202   | 0.0006 |
| <b>whgrn80_1</b>     | -0.0548  | 0.0247   | 4.9358    | 0.0263 |

|                        |          |        |           |        |
|------------------------|----------|--------|-----------|--------|
| <b>whgrn80_2</b>       | 0.0181   | 0.0263 | 0.4735    | 0.4914 |
| <b>soda80_1</b>        | 0.1275   | 0.0315 | 16.4026   | <.0001 |
| <b>soda80_2</b>        | 0.1674   | 0.0274 | 37.3641   | <.0001 |
| <b>soda80_3</b>        | 0.1753   | 0.0271 | 41.9647   | <.0001 |
| <b>soda80_4</b>        | 0.1198   | 0.0255 | 22.0316   | <.0001 |
| <b>cig80_1</b>         | 0.2927   | 0.0801 | 13.3539   | 0.0003 |
| <b>cig80_2</b>         | 0.2618   | 0.1009 | 6.7394    | 0.0094 |
| <b>cig80_3</b>         | 0.3226   | 0.0888 | 13.1906   | 0.0003 |
| <b>cig80_4</b>         | 0.2700   | 0.0788 | 11.7454   | 0.0006 |
| <b>period_2</b>        | 0.1289   | 0.1351 | 0.9104    | 0.3400 |
| <b>period_4</b>        | -0.2827  | 0.0452 | 39.2052   | <.0001 |
| <b>period_6</b>        | 0.0231   | 0.0360 | 0.4109    | 0.5215 |
| <b>period_8</b>        | -0.1070  | 0.0329 | 10.5882   | 0.0011 |
| <b>period_10</b>       | -0.1495  | 0.0305 | 24.0927   | <.0001 |
| <b>mnp_l2</b>          | -0.0560  | 0.0396 | 2.0041    | 0.1569 |
| <b>mnp_l1</b>          | 0.00869  | 0.0521 | 0.0279    | 0.8674 |
| <b>pmh_l2</b>          | -0.00280 | 0.0272 | 0.0106    | 0.9181 |
| <b>pmh_l1</b>          | -0.0200  | 0.0313 | 0.4076    | 0.5232 |
| <b>ost_l2</b>          | 0.0276   | 0.0542 | 0.2600    | 0.6102 |
| <b>ost_l1</b>          | -0.00957 | 0.0663 | 0.0208    | 0.8852 |
| <b>rpmeats_l1_1</b>    | 0.0194   | 0.0805 | 0.0583    | 0.8092 |
| <b>rpmeats_l1_1_ti</b> | 0.00987  | 0.0420 | 0.0552    | 0.8142 |
| <b>rpmeats_l1_2</b>    | -0.00571 | 0.0655 | 0.0076    | 0.9306 |
| <b>rpmeats_l1_2_ti</b> | 0.0159   | 0.0357 | 0.1987    | 0.6557 |
| <b>rpmeats_l1_3</b>    | 0.00421  | 0.0626 | 0.0045    | 0.9463 |
| <b>rpmeats_l1_3_ti</b> | 0.00484  | 0.0346 | 0.0195    | 0.8889 |
| <b>rpmeats_l1_4</b>    | -0.0401  | 0.0538 | 0.5543    | 0.4565 |
| <b>rpmeats_l1_4_ti</b> | -0.00101 | 0.0308 | 0.0011    | 0.9738 |
| <b>coff_l1_1</b>       | -4.7710  | 0.0841 | 3220.0830 | <.0001 |
| <b>coff_l1_1_ti</b>    | -0.3641  | 0.0461 | 62.4311   | <.0001 |
| <b>coff_l1_2</b>       | -2.2025  | 0.0954 | 533.2878  | <.0001 |
| <b>coff_l1_2_ti</b>    | -0.2079  | 0.0515 | 16.2736   | <.0001 |

|                      |          |        |         |        |
|----------------------|----------|--------|---------|--------|
| <b>coff_l1_3</b>     | -0.7482  | 0.1546 | 23.4177 | <.0001 |
| <b>coff_l1_3_ti</b>  | -0.2825  | 0.0819 | 11.9120 | 0.0006 |
| <b>coff_l1_4</b>     | -0.6500  | 0.0941 | 47.6713 | <.0001 |
| <b>coff_l1_4_ti</b>  | -0.1457  | 0.0512 | 8.1096  | 0.0044 |
| <b>whgrn_l1_1</b>    | -0.1932  | 0.0667 | 8.3760  | 0.0038 |
| <b>whgrn_l1_1_ti</b> | 0.1018   | 0.0365 | 7.7990  | 0.0052 |
| <b>whgrn_l1_2</b>    | -0.0610  | 0.0674 | 0.8190  | 0.3655 |
| <b>whgrn_l1_2_ti</b> | 0.0509   | 0.0367 | 1.9267  | 0.1651 |
| <b>whgrn_l1_3</b>    | -0.0775  | 0.0718 | 1.1650  | 0.2804 |
| <b>whgrn_l1_3_ti</b> | 0.0623   | 0.0386 | 2.6101  | 0.1062 |
| <b>whgrn_l1_4</b>    | 0.0950   | 0.0717 | 1.7534  | 0.1855 |
| <b>whgrn_l1_4_ti</b> | -0.0212  | 0.0385 | 0.3029  | 0.5821 |
| <b>soda_l1_1</b>     | 0.1769   | 0.0598 | 8.7340  | 0.0031 |
| <b>soda_l1_1_ti</b>  | -0.0587  | 0.0250 | 5.5168  | 0.0188 |
| <b>soda_l1_2</b>     | 0.1450   | 0.0486 | 8.8928  | 0.0029 |
| <b>soda_l1_2_ti</b>  | -0.00513 | 0.0202 | 0.0645  | 0.7995 |
| <b>soda_l1_3</b>     | 0.2812   | 0.0481 | 34.1163 | <.0001 |
| <b>soda_l1_3_ti</b>  | -0.0467  | 0.0201 | 5.3973  | 0.0202 |
| <b>soda_l1_4</b>     | 0.1476   | 0.0473 | 9.7341  | 0.0018 |
| <b>soda_l1_4_ti</b>  | -0.0184  | 0.0201 | 0.8373  | 0.3602 |
| <b>cal_l1_1</b>      | 0.0974   | 0.0702 | 1.9253  | 0.1653 |
| <b>cal_l1_1_ti</b>   | -0.0196  | 0.0388 | 0.2549  | 0.6136 |
| <b>cal_l1_2</b>      | -0.0240  | 0.0655 | 0.1341  | 0.7142 |
| <b>cal_l1_2_ti</b>   | 0.0248   | 0.0363 | 0.4675  | 0.4941 |
| <b>cal_l1_3</b>      | 0.1122   | 0.0635 | 3.1219  | 0.0772 |
| <b>cal_l1_3_ti</b>   | -0.0542  | 0.0351 | 2.3810  | 0.1228 |
| <b>cal_l1_4</b>      | 0.1282   | 0.0628 | 4.1728  | 0.0411 |
| <b>cal_l1_4_ti</b>   | -0.0521  | 0.0347 | 2.2547  | 0.1332 |
| <b>alc_l1_1</b>      | -0.1897  | 0.0618 | 9.4212  | 0.0021 |
| <b>alc_l1_1_ti</b>   | -0.0537  | 0.0315 | 2.9011  | 0.0885 |
| <b>alc_l1_2</b>      | -0.00494 | 0.0658 | 0.0056  | 0.9402 |
| <b>alc_l1_2_ti</b>   | -0.0370  | 0.0350 | 1.1163  | 0.2907 |



|                    |          |        |        |        |
|--------------------|----------|--------|--------|--------|
| <b>alc_l1_3</b>    | 0.0727   | 0.0845 | 0.7391 | 0.3900 |
| <b>alc_l1_3_ti</b> | -0.0204  | 0.0463 | 0.1938 | 0.6598 |
| <b>cig_l2_1</b>    | -0.2030  | 0.1369 | 2.1998 | 0.1380 |
| <b>cig_l1_1</b>    | 0.1060   | 0.1368 | 0.6006 | 0.4383 |
| <b>cig_l2_2</b>    | -0.1785  | 0.1600 | 1.2453 | 0.2644 |
| <b>cig_l1_2</b>    | 0.2072   | 0.1602 | 1.6730 | 0.1959 |
| <b>cig_l2_3</b>    | -0.1944  | 0.1419 | 1.8772 | 0.1706 |
| <b>cig_l1_3</b>    | 0.3147   | 0.1416 | 4.9420 | 0.0262 |
| <b>cig_l2_4</b>    | -0.1848  | 0.1251 | 2.1810 | 0.1397 |
| <b>cig_l1_4</b>    | 0.2172   | 0.1266 | 2.9449 | 0.0861 |
| <b>mvi_l2</b>      | 0.0109   | 0.0189 | 0.3328 | 0.5640 |
| <b>mvi_l1</b>      | 0.0483   | 0.0193 | 6.2572 | 0.0124 |
| <b>act_l1_1</b>    | -0.00878 | 0.0281 | 0.0978 | 0.7545 |
| <b>act_l1_1_ti</b> | -0.00517 | 0.0315 | 0.0269 | 0.8696 |
| <b>act_l1_2</b>    | 0.00310  | 0.0324 | 0.0092 | 0.9237 |
| <b>act_l1_2_ti</b> | 0.0273   | 0.0385 | 0.5043 | 0.4776 |
| <b>act_l1_3</b>    | 0.0449   | 0.0579 | 0.6014 | 0.4380 |
| <b>act_l1_3_ti</b> | 0.0831   | 0.1374 | 0.3661 | 0.5452 |
| <b>act_l1_4</b>    | 0.0326   | 0.0370 | 0.7741 | 0.3789 |
| <b>act_l1_4_ti</b> | 0.0131   | 0.0357 | 0.1339 | 0.7145 |
| <b>act_l1_5</b>    | -0.0754  | 0.0603 | 1.5663 | 0.2108 |
| <b>act_l1_5_ti</b> | 0.1925   | 0.2232 | 0.7436 | 0.3885 |
| <b>can_l2</b>      | 0.0959   | 0.0767 | 1.5618 | 0.2114 |
| <b>can_l1</b>      | -0.0864  | 0.0689 | 1.5743 | 0.2096 |
| <b>bmi_l2_1</b>    | 0.0927   | 0.1387 | 0.4467 | 0.5039 |
| <b>bmi_l1_1</b>    | -0.2680  | 0.1243 | 4.6459 | 0.0311 |
| <b>bmi_l2_2</b>    | 0.0497   | 0.0843 | 0.3472 | 0.5557 |
| <b>bmi_l1_2</b>    | -0.0445  | 0.0777 | 0.3273 | 0.5672 |
| <b>bmi_l2_3</b>    | 0.0190   | 0.0775 | 0.0603 | 0.8060 |
| <b>bmi_l1_3</b>    | 0.00856  | 0.0718 | 0.0142 | 0.9052 |
| <b>bmi_l2_4</b>    | 0.0120   | 0.0708 | 0.0285 | 0.8659 |
| <b>bmi_l1_4</b>    | 0.0366   | 0.0659 | 0.3094 | 0.5781 |

|                  |          |        |         |        |
|------------------|----------|--------|---------|--------|
| <b>bmi_l2_5</b>  | 0.0133   | 0.0616 | 0.0464  | 0.8294 |
| <b>bmi_l1_5</b>  | -0.00600 | 0.0582 | 0.0106  | 0.9179 |
| <b>chl_l2</b>    | 0.0537   | 0.0391 | 1.8847  | 0.1698 |
| <b>chl_l1</b>    | 0.00175  | 0.0375 | 0.0022  | 0.9627 |
| <b>hbp_l2</b>    | 0.0173   | 0.0444 | 0.1522  | 0.6965 |
| <b>hbp_l1</b>    | -0.0496  | 0.0435 | 1.2954  | 0.2551 |
| <b>sta_l1</b>    | 0.0480   | 0.0315 | 2.3314  | 0.1268 |
| <b>sta_l1_ti</b> | 0.1012   | 0.0392 | 6.6772  | 0.0098 |
| <b>asn_l2_1</b>  | 0.0391   | 0.0274 | 2.0433  | 0.1529 |
| <b>asn_l1_1</b>  | -0.0325  | 0.0278 | 1.3648  | 0.2427 |
| <b>asn_l2_2</b>  | 0.0565   | 0.0275 | 4.2283  | 0.0398 |
| <b>asn_l1_2</b>  | 0.0824   | 0.0273 | 9.1225  | 0.0025 |
| <b>angcbg_l2</b> | -0.2667  | 0.1240 | 4.6244  | 0.0315 |
| <b>angcbg_l1</b> | 0.2120   | 0.1166 | 3.3051  | 0.0691 |
| <b>str_l2</b>    | 0.3628   | 0.2125 | 2.9149  | 0.0878 |
| <b>str_l1</b>    | -0.2559  | 0.1809 | 2.0012  | 0.1572 |
| <b>mi_l2</b>     | 0.4094   | 0.2613 | 2.4547  | 0.1172 |
| <b>mi_l1</b>     | -0.1471  | 0.2328 | 0.3993  | 0.5275 |
| <b>mnp</b>       | 0.0849   | 0.0434 | 3.8279  | 0.0504 |
| <b>pmh</b>       | -0.0350  | 0.0272 | 1.6515  | 0.1988 |
| <b>ost</b>       | -0.0699  | 0.0471 | 2.1999  | 0.1380 |
| <b>rpmeats_1</b> | -0.2271  | 0.0341 | 44.3556 | <.0001 |
| <b>rpmeats_2</b> | 0.0228   | 0.0314 | 0.5301  | 0.4666 |
| <b>rpmeats_3</b> | 0.0588   | 0.0309 | 3.6185  | 0.0571 |
| <b>rpmeats_4</b> | 0.0839   | 0.0298 | 7.9504  | 0.0048 |

(I) Log-linear model to estimate the amount of coffee intake among coffee drinkers

| <b>Variable</b>  | <b>Parameter estimate</b> | <b>Standard error</b> | <b>t value</b> | <b>P value</b> |
|------------------|---------------------------|-----------------------|----------------|----------------|
| <b>Intercept</b> | 1.23268                   | 0.07636               | 16.14          | <.0001         |
| <b>fhx</b>       | 0.00299                   | 0.00348               | 0.86           | 0.3901         |
| <b>smkhx</b>     | 0.05722                   | 0.00325               | 17.62          | <.0001         |

|                      |             |            |       |        |
|----------------------|-------------|------------|-------|--------|
| <b>ochx</b>          | -0.00215    | 0.00298    | -0.72 | 0.4709 |
| <b>employed_1</b>    | 0.01042     | 0.00550    | 1.89  | 0.0582 |
| <b>employed_2</b>    | 0.00518     | 0.00877    | 0.59  | 0.5551 |
| <b>employed_3</b>    | 0.03731     | 0.00446    | 8.36  | <.0001 |
| <b>employed_4</b>    | 0.01340     | 0.00577    | 2.32  | 0.0202 |
| <b>employed_5</b>    | 0.00582     | 0.00413    | 1.41  | 0.1589 |
| <b>employed_6</b>    | -0.00400    | 0.00611    | -0.65 | 0.5126 |
| <b>employed_miss</b> | 0.01096     | 0.01969    | 0.56  | 0.5780 |
| <b>mar80</b>         | 0.01237     | 0.00518    | 2.39  | 0.0169 |
| <b>college</b>       | -0.00145    | 0.00317    | -0.46 | 0.6473 |
| <b>stress82</b>      | 0.00246     | 0.00330    | 0.75  | 0.4561 |
| <b>stress82_miss</b> | 0.00243     | 0.01827    | 0.13  | 0.8941 |
| <b>hhhsch</b>        | -0.00134    | 0.00382    | -0.35 | 0.7252 |
| <b>hcollege</b>      | -0.01300    | 0.00414    | -3.14 | 0.0017 |
| <b>hgradsch</b>      | -0.02530    | 0.00439    | -5.76 | <.0001 |
| <b>lbmi18_2</b>      | 0.04242     | 0.00348    | 12.21 | <.0001 |
| <b>lbmi18_3</b>      | 0.06773     | 0.00555    | 12.21 | <.0001 |
| <b>lbmi18_4</b>      | 0.07985     | 0.01307    | 6.11  | <.0001 |
| <b>baseage</b>       | 0.00381     | 0.00297    | 1.28  | 0.1992 |
| <b>baseage_sq</b>    | -0.00007384 | 0.00002930 | -2.52 | 0.0117 |
| <b>bmi80_1</b>       | 0.00899     | 0.02024    | 0.44  | 0.6569 |
| <b>bmi80_2</b>       | 0.02374     | 0.01362    | 1.74  | 0.0814 |
| <b>bmi80_3</b>       | 0.03397     | 0.01298    | 2.62  | 0.0089 |
| <b>bmi80_4</b>       | 0.02772     | 0.01235    | 2.24  | 0.0248 |
| <b>bmi80_5</b>       | 0.01198     | 0.01192    | 1.00  | 0.3152 |
| <b>act80_1</b>       | -0.00032100 | 0.00433    | -0.07 | 0.9409 |
| <b>act80_2</b>       | -0.00672    | 0.00510    | -1.32 | 0.1877 |
| <b>act80_3</b>       | -0.00037112 | 0.00449    | -0.08 | 0.9342 |
| <b>alc80_1</b>       | -0.01064    | 0.00476    | -2.23 | 0.0254 |
| <b>alc80_2</b>       | -0.00896    | 0.00449    | -2.00 | 0.0460 |
| <b>alc80_3</b>       | 0.01004     | 0.00493    | 2.04  | 0.0417 |
| <b>rpmeats80_1</b>   | -0.04482    | 0.00832    | -5.39 | <.0001 |

|                        |             |         |        |        |
|------------------------|-------------|---------|--------|--------|
| <b>rpmeats80_2</b>     | -0.02663    | 0.00504 | -5.29  | <.0001 |
| <b>rpmeats80_3</b>     | -0.00810    | 0.00423 | -1.92  | 0.0554 |
| <b>rpmeats80_4</b>     | -0.00222    | 0.00382 | -0.58  | 0.5617 |
| <b>coff80_1</b>        | -0.27857    | 0.00421 | -66.15 | <.0001 |
| <b>coff80_2</b>        | -0.25289    | 0.00568 | -44.55 | <.0001 |
| <b>coff80_3</b>        | -0.20524    | 0.00869 | -23.61 | <.0001 |
| <b>whgrn80_1</b>       | -0.00993    | 0.00411 | -2.42  | 0.0156 |
| <b>whgrn80_2</b>       | -0.00050482 | 0.00436 | -0.12  | 0.9077 |
| <b>soda80_1</b>        | 0.04977     | 0.00526 | 9.45   | <.0001 |
| <b>soda80_2</b>        | 0.02794     | 0.00465 | 6.01   | <.0001 |
| <b>soda80_3</b>        | 0.01526     | 0.00459 | 3.33   | 0.0009 |
| <b>soda80_4</b>        | 0.01623     | 0.00443 | 3.66   | 0.0002 |
| <b>cig80_1</b>         | -0.06255    | 0.01185 | -5.28  | <.0001 |
| <b>cig80_2</b>         | -0.06536    | 0.01469 | -4.45  | <.0001 |
| <b>cig80_3</b>         | -0.05575    | 0.01286 | -4.34  | <.0001 |
| <b>cig80_4</b>         | -0.02442    | 0.01140 | -2.14  | 0.0323 |
| <b>period_2</b>        | 0.06896     | 0.01660 | 4.16   | <.0001 |
| <b>period_4</b>        | 0.08159     | 0.00767 | 10.64  | <.0001 |
| <b>period_6</b>        | 0.05337     | 0.00607 | 8.79   | <.0001 |
| <b>period_8</b>        | -0.02204    | 0.00564 | -3.91  | <.0001 |
| <b>period_10</b>       | -0.04470    | 0.00536 | -8.35  | <.0001 |
| <b>mnp_12</b>          | -0.01895    | 0.00636 | -2.98  | 0.0029 |
| <b>mnp_11</b>          | 0.00473     | 0.00834 | 0.57   | 0.5704 |
| <b>pmh_12</b>          | 0.00128     | 0.00453 | 0.28   | 0.7774 |
| <b>pmh_11</b>          | -0.02295    | 0.00517 | -4.44  | <.0001 |
| <b>ost_12</b>          | 0.00699     | 0.00930 | 0.75   | 0.4519 |
| <b>ost_11</b>          | 0.00174     | 0.01127 | 0.15   | 0.8772 |
| <b>rpmeats_11_1</b>    | 0.03005     | 0.01349 | 2.23   | 0.0259 |
| <b>rpmeats_11_1_ti</b> | -0.02246    | 0.00709 | -3.17  | 0.0015 |
| <b>rpmeats_11_2</b>    | -0.00859    | 0.01027 | -0.84  | 0.4031 |
| <b>rpmeats_11_2_ti</b> | -0.00588    | 0.00563 | -1.04  | 0.2967 |
| <b>rpmeats_11_3</b>    | 0.00481     | 0.00959 | 0.50   | 0.6164 |

|                        |             |         |         |        |
|------------------------|-------------|---------|---------|--------|
| <b>rpmeats_l1_3_ti</b> | -0.00851    | 0.00536 | -1.59   | 0.1122 |
| <b>rpmeats_l1_4</b>    | -0.00630    | 0.00821 | -0.77   | 0.4434 |
| <b>rpmeats_l1_4_ti</b> | -0.00084007 | 0.00475 | -0.18   | 0.8596 |
| <b>coff_l1_1</b>       | -1.34507    | 0.01541 | -87.31  | <.0001 |
| <b>coff_l1_1_ti</b>    | -0.21207    | 0.00913 | -23.22  | <.0001 |
| <b>coff_l1_2</b>       | -1.79408    | 0.01317 | -136.22 | <.0001 |
| <b>coff_l1_2_ti</b>    | -0.02458    | 0.00719 | -3.42   | 0.0006 |
| <b>coff_l1_3</b>       | -1.07366    | 0.01472 | -72.93  | <.0001 |
| <b>coff_l1_3_ti</b>    | 0.02195     | 0.00812 | 2.71    | 0.0068 |
| <b>coff_l1_4</b>       | -0.55582    | 0.00650 | -85.48  | <.0001 |
| <b>coff_l1_4_ti</b>    | 0.01845     | 0.00365 | 5.05    | <.0001 |
| <b>whgrn_l1_1</b>      | 0.02544     | 0.01046 | 2.43    | 0.0150 |
| <b>whgrn_l1_1_ti</b>   | -0.01005    | 0.00580 | -1.73   | 0.0829 |
| <b>whgrn_l1_2</b>      | 0.01612     | 0.01046 | 1.54    | 0.1234 |
| <b>whgrn_l1_2_ti</b>   | -0.00923    | 0.00577 | -1.60   | 0.1095 |
| <b>whgrn_l1_3</b>      | 0.00950     | 0.01090 | 0.87    | 0.3833 |
| <b>whgrn_l1_3_ti</b>   | -0.00554    | 0.00594 | -0.93   | 0.3515 |
| <b>whgrn_l1_4</b>      | 0.02722     | 0.01118 | 2.43    | 0.0149 |
| <b>whgrn_l1_4_ti</b>   | -0.01817    | 0.00607 | -2.99   | 0.0027 |
| <b>soda_l1_1</b>       | 0.05656     | 0.00966 | 5.85    | <.0001 |
| <b>soda_l1_1_ti</b>    | -0.00088518 | 0.00401 | -0.22   | 0.8253 |
| <b>soda_l1_2</b>       | 0.03155     | 0.00783 | 4.03    | <.0001 |
| <b>soda_l1_2_ti</b>    | -0.00306    | 0.00324 | -0.94   | 0.3447 |
| <b>soda_l1_3</b>       | 0.02477     | 0.00765 | 3.24    | 0.0012 |
| <b>soda_l1_3_ti</b>    | -0.00241    | 0.00320 | -0.75   | 0.4518 |
| <b>soda_l1_4</b>       | 0.02424     | 0.00778 | 3.12    | 0.0018 |
| <b>soda_l1_4_ti</b>    | -0.00689    | 0.00330 | -2.09   | 0.0368 |
| <b>cal_l1_1</b>        | 0.02635     | 0.01125 | 2.34    | 0.0191 |
| <b>cal_l1_1_ti</b>     | -0.00417    | 0.00629 | -0.66   | 0.5078 |
| <b>cal_l1_2</b>        | 0.02484     | 0.01028 | 2.42    | 0.0156 |
| <b>cal_l1_2_ti</b>     | -0.00571    | 0.00575 | -0.99   | 0.3212 |
| <b>cal_l1_3</b>        | -0.00112    | 0.00987 | -0.11   | 0.9098 |

|                    |          |         |       |        |
|--------------------|----------|---------|-------|--------|
| <b>cal_l1_3_ti</b> | 0.00823  | 0.00552 | 1.49  | 0.1355 |
| <b>cal_l1_4</b>    | 0.00348  | 0.00953 | 0.37  | 0.7151 |
| <b>cal_l1_4_ti</b> | -0.00114 | 0.00533 | -0.21 | 0.8314 |
| <b>alc_l1_1</b>    | -0.01477 | 0.00874 | -1.69 | 0.0911 |
| <b>alc_l1_1_ti</b> | -0.01631 | 0.00446 | -3.65 | 0.0003 |
| <b>alc_l1_2</b>    | -0.00121 | 0.00871 | -0.14 | 0.8899 |
| <b>alc_l1_2_ti</b> | -0.01210 | 0.00468 | -2.59 | 0.0097 |
| <b>alc_l1_3</b>    | 0.01520  | 0.01046 | 1.45  | 0.1461 |
| <b>alc_l1_3_ti</b> | -0.00950 | 0.00583 | -1.63 | 0.1032 |
| <b>cig_l2_1</b>    | -0.00638 | 0.01849 | -0.34 | 0.7302 |
| <b>cig_l1_1</b>    | -0.15134 | 0.01821 | -8.31 | <.0001 |
| <b>cig_l2_2</b>    | 0.01433  | 0.02144 | 0.67  | 0.5038 |
| <b>cig_l1_2</b>    | -0.11777 | 0.02110 | -5.58 | <.0001 |
| <b>cig_l2_3</b>    | 0.02064  | 0.01887 | 1.09  | 0.2742 |
| <b>cig_l1_3</b>    | -0.07218 | 0.01860 | -3.88 | 0.0001 |
| <b>cig_l2_4</b>    | 0.01648  | 0.01673 | 0.99  | 0.3246 |
| <b>cig_l1_4</b>    | -0.03032 | 0.01670 | -1.82 | 0.0695 |
| <b>mvi_l2</b>      | -0.00599 | 0.00308 | -1.95 | 0.0514 |
| <b>mvi_l1</b>      | -0.00663 | 0.00315 | -2.11 | 0.0351 |
| <b>act_l1_1</b>    | -0.02388 | 0.00466 | -5.12 | <.0001 |
| <b>act_l1_1_ti</b> | 0.01470  | 0.00503 | 2.92  | 0.0035 |
| <b>act_l1_2</b>    | -0.02063 | 0.00534 | -3.86 | 0.0001 |
| <b>act_l1_2_ti</b> | 0.01302  | 0.00612 | 2.13  | 0.0335 |
| <b>act_l1_3</b>    | -0.02724 | 0.00937 | -2.91 | 0.0037 |
| <b>act_l1_3_ti</b> | 0.01830  | 0.02044 | 0.90  | 0.3706 |
| <b>act_l1_4</b>    | -0.01649 | 0.00606 | -2.72 | 0.0065 |
| <b>act_l1_4_ti</b> | 0.01178  | 0.00571 | 2.06  | 0.0390 |
| <b>act_l1_5</b>    | -0.00720 | 0.00983 | -0.73 | 0.4638 |
| <b>act_l1_5_ti</b> | 0.00271  | 0.03467 | 0.08  | 0.9377 |
| <b>can_l2</b>      | 0.02426  | 0.01314 | 1.85  | 0.0649 |
| <b>can_l1</b>      | -0.03630 | 0.01172 | -3.10 | 0.0020 |
| <b>bmi_l2_1</b>    | -0.00201 | 0.02445 | -0.08 | 0.9344 |

|                  |          |         |        |        |
|------------------|----------|---------|--------|--------|
| <b>bmi_l1_1</b>  | 0.03469  | 0.02204 | 1.57   | 0.1155 |
| <b>bmi_l2_2</b>  | -0.00665 | 0.01492 | -0.45  | 0.6560 |
| <b>bmi_l1_2</b>  | 0.05686  | 0.01361 | 4.18   | <.0001 |
| <b>bmi_l2_3</b>  | -0.00754 | 0.01385 | -0.54  | 0.5862 |
| <b>bmi_l1_3</b>  | 0.05810  | 0.01269 | 4.58   | <.0001 |
| <b>bmi_l2_4</b>  | -0.01099 | 0.01284 | -0.86  | 0.3922 |
| <b>bmi_l1_4</b>  | 0.05209  | 0.01181 | 4.41   | <.0001 |
| <b>bmi_l2_5</b>  | -0.00522 | 0.01137 | -0.46  | 0.6464 |
| <b>bmi_l1_5</b>  | 0.02849  | 0.01059 | 2.69   | 0.0071 |
| <b>chl_l2</b>    | 0.00156  | 0.00636 | 0.25   | 0.8062 |
| <b>chl_l1</b>    | -0.01243 | 0.00606 | -2.05  | 0.0402 |
| <b>hbp_l2</b>    | -0.00651 | 0.00727 | -0.90  | 0.3705 |
| <b>hbp_l1</b>    | -0.05289 | 0.00708 | -7.47  | <.0001 |
| <b>sta_l1</b>    | -0.00912 | 0.00542 | -1.68  | 0.0924 |
| <b>sta_l1_ti</b> | -0.00273 | 0.00598 | -0.46  | 0.6477 |
| <b>asn_l2_1</b>  | -0.00308 | 0.00453 | -0.68  | 0.4963 |
| <b>asn_l1_1</b>  | -0.01506 | 0.00464 | -3.24  | 0.0012 |
| <b>asn_l2_2</b>  | 0.00446  | 0.00446 | 1.00   | 0.3172 |
| <b>asn_l1_2</b>  | -0.00155 | 0.00444 | -0.35  | 0.7273 |
| <b>angcbg_l2</b> | 0.03858  | 0.02030 | 1.90   | 0.0573 |
| <b>angcbg_l1</b> | -0.04681 | 0.01879 | -2.49  | 0.0127 |
| <b>str_l2</b>    | 0.10077  | 0.03999 | 2.52   | 0.0117 |
| <b>str_l1</b>    | -0.13684 | 0.03418 | -4.00  | <.0001 |
| <b>mi_l2</b>     | 0.05422  | 0.04300 | 1.26   | 0.2074 |
| <b>mi_l1</b>     | -0.08283 | 0.03826 | -2.16  | 0.0304 |
| <b>mnp</b>       | 0.00932  | 0.00702 | 1.33   | 0.1845 |
| <b>pmh</b>       | -0.02056 | 0.00448 | -4.59  | <.0001 |
| <b>ost</b>       | -0.02268 | 0.00795 | -2.85  | 0.0043 |
| <b>rpmeats_1</b> | -0.11124 | 0.00565 | -19.69 | <.0001 |
| <b>rpmeats_2</b> | -0.07239 | 0.00501 | -14.45 | <.0001 |
| <b>rpmeats_3</b> | -0.05723 | 0.00487 | -11.76 | <.0001 |
| <b>rpmeats_4</b> | -0.03682 | 0.00467 | -7.89  | <.0001 |

---

(J) Logistic model to estimate the probability of eating whole grain

| <b>Variable</b>      | <b>Log odds ratio</b> | <b>Standard error</b> | <b>Wald chi-square</b> | <b>P value</b> |
|----------------------|-----------------------|-----------------------|------------------------|----------------|
| <b>Intercept</b>     | 6.3943                | 0.6685                | 91.5055                | <.0001         |
| <b>fhx</b>           | 0.0531                | 0.0312                | 2.8981                 | 0.0887         |
| <b>smkhx</b>         | -0.0128               | 0.0314                | 0.1656                 | 0.6840         |
| <b>ochx</b>          | 0.1187                | 0.0263                | 20.3355                | <.0001         |
| <b>employed_1</b>    | 0.0909                | 0.0486                | 3.4966                 | 0.0615         |
| <b>employed_2</b>    | 0.1519                | 0.0774                | 3.8466                 | 0.0498         |
| <b>employed_3</b>    | 0.0898                | 0.0385                | 5.4356                 | 0.0197         |
| <b>employed_4</b>    | 0.1202                | 0.0544                | 4.8774                 | 0.0272         |
| <b>employed_5</b>    | 0.0841                | 0.0356                | 5.5892                 | 0.0181         |
| <b>employed_6</b>    | 0.1256                | 0.0560                | 5.0409                 | 0.0248         |
| <b>employed_miss</b> | -0.4246               | 0.1798                | 5.5763                 | 0.0182         |
| <b>mar80</b>         | -0.1141               | 0.0449                | 6.4452                 | 0.0111         |
| <b>college</b>       | 0.0815                | 0.0300                | 7.3738                 | 0.0066         |
| <b>stress82</b>      | -0.0253               | 0.0293                | 0.7418                 | 0.3891         |
| <b>stress82_miss</b> | 0.1797                | 0.1710                | 1.1046                 | 0.2933         |
| <b>hhighsch</b>      | 0.1805                | 0.0307                | 34.5604                | <.0001         |
| <b>hcollege</b>      | 0.2294                | 0.0359                | 40.7542                | <.0001         |
| <b>hgradsch</b>      | 0.1782                | 0.0387                | 21.1595                | <.0001         |
| <b>lbmi18_2</b>      | -0.00284              | 0.0307                | 0.0086                 | 0.9261         |
| <b>lbmi18_3</b>      | 0.0965                | 0.0490                | 3.8844                 | 0.0487         |
| <b>lbmi18_4</b>      | 0.0929                | 0.1110                | 0.7013                 | 0.4024         |
| <b>baseage</b>       | -0.0347               | 0.0259                | 1.7918                 | 0.1807         |
| <b>baseage_sq</b>    | 0.000108              | 0.000255              | 0.1813                 | 0.6702         |
| <b>bmi80_1</b>       | 0.2680                | 0.1538                | 3.0366                 | 0.0814         |
| <b>bmi80_2</b>       | 0.3792                | 0.1135                | 11.1548                | 0.0008         |
| <b>bmi80_3</b>       | 0.3360                | 0.1077                | 9.7289                 | 0.0018         |
| <b>bmi80_4</b>       | 0.2759                | 0.1015                | 7.3897                 | 0.0066         |



|                    |          |        |          |        |
|--------------------|----------|--------|----------|--------|
| <b>bmi80_5</b>     | 0.2447   | 0.0966 | 6.4132   | 0.0113 |
| <b>act80_1</b>     | -0.0776  | 0.0393 | 3.8994   | 0.0483 |
| <b>act80_2</b>     | 0.0318   | 0.0489 | 0.4234   | 0.5152 |
| <b>act80_3</b>     | 0.0125   | 0.0433 | 0.0839   | 0.7721 |
| <b>alc80_1</b>     | -0.0102  | 0.0437 | 0.0549   | 0.8148 |
| <b>alc80_2</b>     | 0.0717   | 0.0426 | 2.8234   | 0.0929 |
| <b>alc80_3</b>     | 0.0677   | 0.0475 | 2.0333   | 0.1539 |
| <b>rpmeats80_1</b> | -0.1759  | 0.0758 | 5.3890   | 0.0203 |
| <b>rpmeats80_2</b> | -0.0846  | 0.0435 | 3.7734   | 0.0521 |
| <b>rpmeats80_3</b> | -0.0756  | 0.0370 | 4.1722   | 0.0411 |
| <b>rpmeats80_4</b> | -0.1000  | 0.0334 | 8.9537   | 0.0028 |
| <b>coff80_1</b>    | 0.1008   | 0.0383 | 6.9210   | 0.0085 |
| <b>coff80_2</b>    | 0.1109   | 0.0563 | 3.8736   | 0.0491 |
| <b>coff80_3</b>    | -0.00619 | 0.0781 | 0.0063   | 0.9368 |
| <b>whgrn80_1</b>   | -0.5535  | 0.0532 | 108.2000 | <.0001 |
| <b>whgrn80_2</b>   | 0.1291   | 0.0618 | 4.3597   | 0.0368 |
| <b>soda80_1</b>    | 0.0130   | 0.0449 | 0.0843   | 0.7716 |
| <b>soda80_2</b>    | 0.1018   | 0.0403 | 6.3812   | 0.0115 |
| <b>soda80_3</b>    | 0.1131   | 0.0400 | 7.9737   | 0.0047 |
| <b>soda80_4</b>    | 0.0920   | 0.0368 | 6.2637   | 0.0123 |
| <b>cig80_1</b>     | 0.2363   | 0.0836 | 7.9831   | 0.0047 |
| <b>cig80_2</b>     | 0.0174   | 0.1129 | 0.0237   | 0.8777 |
| <b>cig80_3</b>     | 0.1413   | 0.0912 | 2.3998   | 0.1214 |
| <b>cig80_4</b>     | 0.1132   | 0.0755 | 2.2480   | 0.1338 |
| <b>period_2</b>    | 0.3916   | 0.2698 | 2.1072   | 0.1466 |
| <b>period_4</b>    | 0.3096   | 0.0668 | 21.5069  | <.0001 |
| <b>period_6</b>    | 0.0586   | 0.0564 | 1.0817   | 0.2983 |
| <b>period_8</b>    | -0.2411  | 0.0511 | 22.2941  | <.0001 |
| <b>period_10</b>   | -0.0504  | 0.0499 | 1.0197   | 0.3126 |
| <b>mnp_l2</b>      | -0.0505  | 0.0580 | 0.7564   | 0.3845 |
| <b>mnp_l1</b>      | 0.0268   | 0.0757 | 0.1250   | 0.7237 |
| <b>pmh_l2</b>      | 0.0578   | 0.0442 | 1.7092   | 0.1911 |

|                        |         |        |          |        |
|------------------------|---------|--------|----------|--------|
| <b>pmh_l1</b>          | 0.00561 | 0.0499 | 0.0127   | 0.9104 |
| <b>ost_l2</b>          | 0.0612  | 0.0812 | 0.5672   | 0.4514 |
| <b>ost_l1</b>          | -0.0287 | 0.0980 | 0.0861   | 0.7692 |
| <b>rpmeats_l1_1</b>    | 0.3212  | 0.1101 | 8.5165   | 0.0035 |
| <b>rpmeats_l1_1_ti</b> | -0.0845 | 0.0585 | 2.0852   | 0.1487 |
| <b>rpmeats_l1_2</b>    | 0.1810  | 0.0787 | 5.2924   | 0.0214 |
| <b>rpmeats_l1_2_ti</b> | -0.0135 | 0.0446 | 0.0921   | 0.7615 |
| <b>rpmeats_l1_3</b>    | 0.2279  | 0.0744 | 9.3950   | 0.0022 |
| <b>rpmeats_l1_3_ti</b> | -0.0191 | 0.0432 | 0.1949   | 0.6589 |
| <b>rpmeats_l1_4</b>    | 0.1640  | 0.0623 | 6.9216   | 0.0085 |
| <b>rpmeats_l1_4_ti</b> | -0.0526 | 0.0377 | 1.9473   | 0.1629 |
| <b>coff_l1_1</b>       | -0.0397 | 0.0873 | 0.2067   | 0.6494 |
| <b>coff_l1_1_ti</b>    | 0.0148  | 0.0412 | 0.1288   | 0.7197 |
| <b>coff_l1_2</b>       | -0.1332 | 0.1072 | 1.5447   | 0.2139 |
| <b>coff_l1_2_ti</b>    | 0.0402  | 0.0580 | 0.4810   | 0.4880 |
| <b>coff_l1_3</b>       | -0.0667 | 0.1270 | 0.2757   | 0.5995 |
| <b>coff_l1_3_ti</b>    | 0.0163  | 0.0712 | 0.0523   | 0.8191 |
| <b>coff_l1_4</b>       | 0.00647 | 0.0571 | 0.0128   | 0.9099 |
| <b>coff_l1_4_ti</b>    | -0.0558 | 0.0318 | 3.0789   | 0.0793 |
| <b>whgrn_l1_1</b>      | -3.3692 | 0.2275 | 219.3148 | <.0001 |
| <b>whgrn_l1_1_ti</b>   | 0.1365  | 0.1206 | 1.2801   | 0.2579 |
| <b>whgrn_l1_2</b>      | -0.9343 | 0.2441 | 14.6558  | 0.0001 |
| <b>whgrn_l1_2_ti</b>   | -0.2163 | 0.1295 | 2.7885   | 0.0949 |
| <b>whgrn_l1_3</b>      | -0.2756 | 0.2762 | 0.9962   | 0.3182 |
| <b>whgrn_l1_3_ti</b>   | -0.2047 | 0.1460 | 1.9661   | 0.1609 |
| <b>whgrn_l1_4</b>      | -0.2549 | 0.2894 | 0.7758   | 0.3784 |
| <b>whgrn_l1_4_ti</b>   | -0.0643 | 0.1533 | 0.1759   | 0.6750 |
| <b>soda_l1_1</b>       | -0.0352 | 0.0730 | 0.2318   | 0.6302 |
| <b>soda_l1_1_ti</b>    | -0.0188 | 0.0309 | 0.3707   | 0.5426 |
| <b>soda_l1_2</b>       | 0.2215  | 0.0634 | 12.1937  | 0.0005 |
| <b>soda_l1_2_ti</b>    | -0.0249 | 0.0272 | 0.8443   | 0.3582 |
| <b>soda_l1_3</b>       | 0.1702  | 0.0622 | 7.4843   | 0.0062 |

|                     |          |        |         |        |
|---------------------|----------|--------|---------|--------|
| <b>soda_l1_3_ti</b> | -0.00888 | 0.0272 | 0.1066  | 0.7441 |
| <b>soda_l1_4</b>    | 0.0217   | 0.0589 | 0.1357  | 0.7126 |
| <b>soda_l1_4_ti</b> | -0.00367 | 0.0261 | 0.0197  | 0.8883 |
| <b>cal_l1_1</b>     | -0.4036  | 0.0856 | 22.2216 | <.0001 |
| <b>cal_l1_1_ti</b>  | 0.0557   | 0.0502 | 1.2351  | 0.2664 |
| <b>cal_l1_2</b>     | -0.3556  | 0.0834 | 18.1632 | <.0001 |
| <b>cal_l1_2_ti</b>  | 0.0983   | 0.0492 | 3.9915  | 0.0457 |
| <b>cal_l1_3</b>     | -0.2564  | 0.0848 | 9.1368  | 0.0025 |
| <b>cal_l1_3_ti</b>  | 0.0958   | 0.0501 | 3.6618  | 0.0557 |
| <b>cal_l1_4</b>     | -0.1001  | 0.0880 | 1.2928  | 0.2555 |
| <b>cal_l1_4_ti</b>  | 0.0640   | 0.0519 | 1.5217  | 0.2174 |
| <b>alc_l1_1</b>     | -0.0934  | 0.0671 | 1.9360  | 0.1641 |
| <b>alc_l1_1_ti</b>  | 0.0336   | 0.0336 | 1.0031  | 0.3166 |
| <b>alc_l1_2</b>     | 0.1687   | 0.0715 | 5.5600  | 0.0184 |
| <b>alc_l1_2_ti</b>  | 0.0290   | 0.0393 | 0.5435  | 0.4610 |
| <b>alc_l1_3</b>     | 0.1043   | 0.0875 | 1.4206  | 0.2333 |
| <b>alc_l1_3_ti</b>  | 0.0352   | 0.0508 | 0.4794  | 0.4887 |
| <b>cig_l2_1</b>     | 0.2431   | 0.1187 | 4.1957  | 0.0405 |
| <b>cig_l1_1</b>     | 0.2515   | 0.1108 | 5.1490  | 0.0233 |
| <b>cig_l2_2</b>     | 0.2540   | 0.1489 | 2.9104  | 0.0880 |
| <b>cig_l1_2</b>     | 0.2948   | 0.1414 | 4.3442  | 0.0371 |
| <b>cig_l2_3</b>     | 0.2360   | 0.1208 | 3.8186  | 0.0507 |
| <b>cig_l1_3</b>     | 0.0599   | 0.1124 | 0.2844  | 0.5938 |
| <b>cig_l2_4</b>     | 0.1167   | 0.1011 | 1.3336  | 0.2482 |
| <b>cig_l1_4</b>     | 0.1203   | 0.0964 | 1.5574  | 0.2120 |
| <b>mvi_l2</b>       | 0.1205   | 0.0284 | 18.0459 | <.0001 |
| <b>mvi_l1</b>       | 0.1118   | 0.0289 | 14.9934 | 0.0001 |
| <b>act_l1_1</b>     | -0.2542  | 0.0484 | 27.6052 | <.0001 |
| <b>act_l1_1_ti</b>  | 0.0196   | 0.0426 | 0.2111  | 0.6459 |
| <b>act_l1_2</b>     | 0.0255   | 0.0579 | 0.1947  | 0.6590 |
| <b>act_l1_2_ti</b>  | -0.1156  | 0.0537 | 4.6261  | 0.0315 |
| <b>act_l1_3</b>     | 0.2891   | 0.1200 | 5.8045  | 0.0160 |

|                    |          |        |         |        |
|--------------------|----------|--------|---------|--------|
| <b>act_l1_3_ti</b> | -0.2559  | 0.1339 | 3.6520  | 0.0560 |
| <b>act_l1_4</b>    | 0.1060   | 0.0690 | 2.3611  | 0.1244 |
| <b>act_l1_4_ti</b> | -0.0381  | 0.0537 | 0.5036  | 0.4779 |
| <b>act_l1_5</b>    | 0.2413   | 0.1298 | 3.4529  | 0.0631 |
| <b>act_l1_5_ti</b> | -0.3162  | 0.2306 | 1.8811  | 0.1702 |
| <b>can_l2</b>      | 0.0319   | 0.1158 | 0.0761  | 0.7826 |
| <b>can_l1</b>      | -0.0473  | 0.1028 | 0.2119  | 0.6453 |
| <b>bmi_l2_1</b>    | -0.1968  | 0.1847 | 1.1361  | 0.2865 |
| <b>bmi_l1_1</b>    | -0.4415  | 0.1611 | 7.5073  | 0.0061 |
| <b>bmi_l2_2</b>    | -0.2677  | 0.1314 | 4.1514  | 0.0416 |
| <b>bmi_l1_2</b>    | -0.2140  | 0.1179 | 3.2959  | 0.0695 |
| <b>bmi_l2_3</b>    | -0.0809  | 0.1228 | 0.4333  | 0.5104 |
| <b>bmi_l1_3</b>    | -0.1720  | 0.1108 | 2.4084  | 0.1207 |
| <b>bmi_l2_4</b>    | -0.0585  | 0.1135 | 0.2652  | 0.6066 |
| <b>bmi_l1_4</b>    | -0.1307  | 0.1029 | 1.6150  | 0.2038 |
| <b>bmi_l2_5</b>    | -0.00471 | 0.1000 | 0.0022  | 0.9625 |
| <b>bmi_l1_5</b>    | -0.0684  | 0.0920 | 0.5520  | 0.4575 |
| <b>chl_l2</b>      | -0.0765  | 0.0602 | 1.6161  | 0.2036 |
| <b>chl_l1</b>      | 0.1003   | 0.0573 | 3.0585  | 0.0803 |
| <b>hbp_l2</b>      | 0.0592   | 0.0638 | 0.8606  | 0.3536 |
| <b>hbp_l1</b>      | -0.0190  | 0.0620 | 0.0936  | 0.7596 |
| <b>sta_l1</b>      | 0.0300   | 0.0510 | 0.3466  | 0.5560 |
| <b>sta_l1_ti</b>   | -0.00367 | 0.0648 | 0.0032  | 0.9548 |
| <b>asn_l2_1</b>    | -0.0108  | 0.0404 | 0.0709  | 0.7900 |
| <b>asn_l1_1</b>    | 0.0219   | 0.0412 | 0.2839  | 0.5941 |
| <b>asn_l2_2</b>    | -0.00663 | 0.0406 | 0.0267  | 0.8703 |
| <b>asn_l1_2</b>    | 0.1465   | 0.0402 | 13.2814 | 0.0003 |
| <b>angcbg_l2</b>   | -0.4187  | 0.1964 | 4.5464  | 0.0330 |
| <b>angcbg_l1</b>   | 0.3049   | 0.1853 | 2.7078  | 0.0999 |
| <b>str_l2</b>      | -0.2203  | 0.2852 | 0.5964  | 0.4400 |
| <b>str_l1</b>      | 0.0200   | 0.2461 | 0.0066  | 0.9351 |
| <b>mi_l2</b>       | 0.1207   | 0.3906 | 0.0956  | 0.7572 |

|                  |         |        |         |        |
|------------------|---------|--------|---------|--------|
| <b>mi_l1</b>     | 0.2300  | 0.3393 | 0.4594  | 0.4979 |
| <b>mnp</b>       | 0.0988  | 0.0618 | 2.5540  | 0.1100 |
| <b>pmh</b>       | 0.1382  | 0.0429 | 10.3780 | 0.0013 |
| <b>ost</b>       | 0.0182  | 0.0698 | 0.0683  | 0.7938 |
| <b>rpmeats_1</b> | -0.0151 | 0.0475 | 0.1010  | 0.7506 |
| <b>rpmeats_2</b> | 0.1760  | 0.0428 | 16.9193 | <.0001 |
| <b>rpmeats_3</b> | 0.2253  | 0.0422 | 28.4962 | <.0001 |
| <b>rpmeats_4</b> | 0.1643  | 0.0391 | 17.6901 | <.0001 |
| <b>coff_1</b>    | -0.5777 | 0.0636 | 82.4500 | <.0001 |
| <b>coff_2</b>    | -0.2507 | 0.0614 | 16.6756 | <.0001 |
| <b>coff_3</b>    | -0.2039 | 0.0662 | 9.4959  | 0.0021 |
| <b>coff_4</b>    | -0.2317 | 0.0363 | 40.7941 | <.0001 |

(K) Log-linear model to estimate the amount of whole grain intake in women who eat whole grain

| <b>Variable</b>      | <b>Parameter estimate</b> | <b>Standard error</b> | <b>t value</b> | <b>P value</b> |
|----------------------|---------------------------|-----------------------|----------------|----------------|
| <b>Intercept</b>     | 0.45405                   | 0.07233               | 6.28           | <.0001         |
| <b>fhx</b>           | 0.00433                   | 0.00331               | 1.31           | 0.1914         |
| <b>smkhx</b>         | -0.00582                  | 0.00310               | -1.88          | 0.0606         |
| <b>ochx</b>          | 0.01182                   | 0.00284               | 4.16           | <.0001         |
| <b>employed_1</b>    | -0.00274                  | 0.00525               | -0.52          | 0.6019         |
| <b>employed_2</b>    | -0.00570                  | 0.00834               | -0.68          | 0.4948         |
| <b>employed_3</b>    | 0.00643                   | 0.00423               | 1.52           | 0.1289         |
| <b>employed_4</b>    | 0.01512                   | 0.00551               | 2.75           | 0.0060         |
| <b>employed_5</b>    | 0.00096517                | 0.00392               | 0.25           | 0.8054         |
| <b>employed_6</b>    | 0.00894                   | 0.00580               | 1.54           | 0.1230         |
| <b>employed_miss</b> | -0.00672                  | 0.01866               | -0.36          | 0.7187         |
| <b>mar80</b>         | -0.02382                  | 0.00497               | -4.79          | <.0001         |
| <b>college</b>       | 0.01715                   | 0.00301               | 5.70           | <.0001         |
| <b>stress82</b>      | 0.00793                   | 0.00313               | 2.53           | 0.0114         |
| <b>stress82_miss</b> | -0.00200                  | 0.01728               | -0.12          | 0.9079         |
| <b>hhhighsch</b>     | 0.02062                   | 0.00365               | 5.65           | <.0001         |

|                    |             |            |        |        |
|--------------------|-------------|------------|--------|--------|
| <b>hcollege</b>    | 0.03163     | 0.00395    | 8.00   | <.0001 |
| <b>hgradsch</b>    | 0.02832     | 0.00418    | 6.77   | <.0001 |
| <b>lbmi18_2</b>    | 0.00430     | 0.00333    | 1.29   | 0.1966 |
| <b>lbmi18_3</b>    | 0.00580     | 0.00532    | 1.09   | 0.2756 |
| <b>lbmi18_4</b>    | 0.01380     | 0.01258    | 1.10   | 0.2727 |
| <b>baseage</b>     | 0.00734     | 0.00281    | 2.61   | 0.0091 |
| <b>baseage_sq</b>  | -0.00006466 | 0.00002778 | -2.33  | 0.0199 |
| <b>bmi80_1</b>     | -0.00072843 | 0.01901    | -0.04  | 0.9694 |
| <b>bmi80_2</b>     | 0.02405     | 0.01265    | 1.90   | 0.0574 |
| <b>bmi80_3</b>     | 0.02845     | 0.01204    | 2.36   | 0.0181 |
| <b>bmi80_4</b>     | 0.01925     | 0.01143    | 1.68   | 0.0921 |
| <b>bmi80_5</b>     | 0.02474     | 0.01099    | 2.25   | 0.0244 |
| <b>act80_1</b>     | -0.01464    | 0.00410    | -3.57  | 0.0004 |
| <b>act80_2</b>     | -0.00005156 | 0.00483    | -0.01  | 0.9915 |
| <b>act80_3</b>     | -0.00160    | 0.00425    | -0.38  | 0.7064 |
| <b>alc80_1</b>     | 0.02478     | 0.00460    | 5.38   | <.0001 |
| <b>alc80_2</b>     | 0.01984     | 0.00437    | 4.54   | <.0001 |
| <b>alc80_3</b>     | 0.02414     | 0.00484    | 4.99   | <.0001 |
| <b>rpmeats80_1</b> | 0.01806     | 0.00766    | 2.36   | 0.0184 |
| <b>rpmeats80_2</b> | -0.01132    | 0.00478    | -2.37  | 0.0179 |
| <b>rpmeats80_3</b> | -0.01992    | 0.00405    | -4.91  | <.0001 |
| <b>rpmeats80_4</b> | -0.00522    | 0.00364    | -1.43  | 0.1519 |
| <b>coff80_1</b>    | 0.00875     | 0.00395    | 2.21   | 0.0268 |
| <b>coff80_2</b>    | 0.00901     | 0.00554    | 1.62   | 0.1042 |
| <b>coff80_3</b>    | 0.00355     | 0.00860    | 0.41   | 0.6802 |
| <b>whgrn80_1</b>   | -0.21612    | 0.00389    | -55.62 | <.0001 |
| <b>whgrn80_2</b>   | -0.07818    | 0.00412    | -18.96 | <.0001 |
| <b>soda80_1</b>    | 0.04787     | 0.00501    | 9.56   | <.0001 |
| <b>soda80_2</b>    | 0.04151     | 0.00440    | 9.43   | <.0001 |
| <b>soda80_3</b>    | 0.03893     | 0.00434    | 8.97   | <.0001 |
| <b>soda80_4</b>    | 0.02660     | 0.00416    | 6.39   | <.0001 |
| <b>cig80_1</b>     | 0.05005     | 0.01157    | 4.33   | <.0001 |

|                        |             |         |         |        |
|------------------------|-------------|---------|---------|--------|
| <b>cig80_2</b>         | 0.01619     | 0.01436 | 1.13    | 0.2597 |
| <b>cig80_3</b>         | 0.03671     | 0.01258 | 2.92    | 0.0035 |
| <b>cig80_4</b>         | 0.02224     | 0.01117 | 1.99    | 0.0464 |
| <b>period_2</b>        | 0.00769     | 0.01611 | 0.48    | 0.6329 |
| <b>period_4</b>        | 0.12061     | 0.00726 | 16.60   | <.0001 |
| <b>period_6</b>        | -0.04557    | 0.00574 | -7.94   | <.0001 |
| <b>period_8</b>        | -0.09786    | 0.00533 | -18.37  | <.0001 |
| <b>period_10</b>       | 0.00279     | 0.00503 | 0.55    | 0.5800 |
| <b>mnp_12</b>          | -0.01085    | 0.00605 | -1.79   | 0.0730 |
| <b>mnp_11</b>          | -0.01374    | 0.00794 | -1.73   | 0.0836 |
| <b>pmh_12</b>          | 0.00952     | 0.00430 | 2.22    | 0.0267 |
| <b>pmh_11</b>          | 0.00626     | 0.00492 | 1.27    | 0.2029 |
| <b>ost_12</b>          | -0.01570    | 0.00881 | -1.78   | 0.0747 |
| <b>ost_11</b>          | -0.01496    | 0.01070 | -1.40   | 0.1618 |
| <b>rpmeats_11_1</b>    | 0.12414     | 0.01296 | 9.58    | <.0001 |
| <b>rpmeats_11_1_ti</b> | -0.01214    | 0.00679 | -1.79   | 0.0736 |
| <b>rpmeats_11_2</b>    | 0.08682     | 0.01000 | 8.69    | <.0001 |
| <b>rpmeats_11_2_ti</b> | -0.00962    | 0.00546 | -1.76   | 0.0782 |
| <b>rpmeats_11_3</b>    | 0.05141     | 0.00935 | 5.50    | <.0001 |
| <b>rpmeats_11_3_ti</b> | -0.00266    | 0.00520 | -0.51   | 0.6085 |
| <b>rpmeats_11_4</b>    | 0.03071     | 0.00800 | 3.84    | 0.0001 |
| <b>rpmeats_11_4_ti</b> | -0.00131    | 0.00460 | -0.28   | 0.7760 |
| <b>coff_11_1</b>       | 0.01541     | 0.01107 | 1.39    | 0.1638 |
| <b>coff_11_1_ti</b>    | -0.01004    | 0.00540 | -1.86   | 0.0633 |
| <b>coff_11_2</b>       | 0.00664     | 0.01332 | 0.50    | 0.6182 |
| <b>coff_11_2_ti</b>    | -0.00090839 | 0.00701 | -0.13   | 0.8968 |
| <b>coff_11_3</b>       | 0.01664     | 0.01522 | 1.09    | 0.2741 |
| <b>coff_11_3_ti</b>    | -0.00740    | 0.00824 | -0.90   | 0.3692 |
| <b>coff_11_4</b>       | 0.00543     | 0.00692 | 0.78    | 0.4327 |
| <b>coff_11_4_ti</b>    | -0.00979    | 0.00373 | -2.62   | 0.0087 |
| <b>whgrn_11_1</b>      | -1.44035    | 0.01015 | -141.86 | <.0001 |
| <b>whgrn_11_1_ti</b>   | 0.09978     | 0.00561 | 17.78   | <.0001 |

|                      |          |         |        |        |
|----------------------|----------|---------|--------|--------|
| <b>whgrn_l1_2</b>    | -0.83614 | 0.01007 | -83.06 | <.0001 |
| <b>whgrn_l1_2_ti</b> | 0.04045  | 0.00553 | 7.32   | <.0001 |
| <b>whgrn_l1_3</b>    | -0.53287 | 0.01050 | -50.74 | <.0001 |
| <b>whgrn_l1_3_ti</b> | 0.02485  | 0.00570 | 4.36   | <.0001 |
| <b>whgrn_l1_4</b>    | -0.26952 | 0.01076 | -25.06 | <.0001 |
| <b>whgrn_l1_4_ti</b> | 0.00676  | 0.00581 | 1.16   | 0.2453 |
| <b>soda_l1_1</b>     | 0.08281  | 0.00932 | 8.89   | <.0001 |
| <b>soda_l1_1_ti</b>  | -0.01102 | 0.00387 | -2.85  | 0.0044 |
| <b>soda_l1_2</b>     | 0.06012  | 0.00753 | 7.99   | <.0001 |
| <b>soda_l1_2_ti</b>  | -0.00723 | 0.00311 | -2.33  | 0.0200 |
| <b>soda_l1_3</b>     | 0.02748  | 0.00737 | 3.73   | 0.0002 |
| <b>soda_l1_3_ti</b>  | 0.00225  | 0.00308 | 0.73   | 0.4638 |
| <b>soda_l1_4</b>     | 0.02569  | 0.00746 | 3.44   | 0.0006 |
| <b>soda_l1_4_ti</b>  | -0.00137 | 0.00316 | -0.43  | 0.6644 |
| <b>cal_l1_1</b>      | -0.19564 | 0.01091 | -17.92 | <.0001 |
| <b>cal_l1_1_ti</b>   | -0.02363 | 0.00608 | -3.89  | 0.0001 |
| <b>cal_l1_2</b>      | -0.11843 | 0.00997 | -11.88 | <.0001 |
| <b>cal_l1_2_ti</b>   | -0.01877 | 0.00555 | -3.38  | 0.0007 |
| <b>cal_l1_3</b>      | -0.09327 | 0.00956 | -9.76  | <.0001 |
| <b>cal_l1_3_ti</b>   | -0.01074 | 0.00532 | -2.02  | 0.0435 |
| <b>cal_l1_4</b>      | -0.05743 | 0.00925 | -6.21  | <.0001 |
| <b>cal_l1_4_ti</b>   | -0.00290 | 0.00515 | -0.56  | 0.5736 |
| <b>alc_l1_1</b>      | 0.05705  | 0.00860 | 6.63   | <.0001 |
| <b>alc_l1_1_ti</b>   | 0.01846  | 0.00439 | 4.20   | <.0001 |
| <b>alc_l1_2</b>      | 0.04883  | 0.00863 | 5.66   | <.0001 |
| <b>alc_l1_2_ti</b>   | 0.01689  | 0.00462 | 3.65   | 0.0003 |
| <b>alc_l1_3</b>      | 0.03864  | 0.01043 | 3.70   | 0.0002 |
| <b>alc_l1_3_ti</b>   | 0.01372  | 0.00580 | 2.37   | 0.0180 |
| <b>cig_l2_1</b>      | 0.01414  | 0.01827 | 0.77   | 0.4390 |
| <b>cig_l1_1</b>      | 0.13795  | 0.01811 | 7.62   | <.0001 |
| <b>cig_l2_2</b>      | 0.02192  | 0.02120 | 1.03   | 0.3011 |
| <b>cig_l1_2</b>      | 0.08891  | 0.02096 | 4.24   | <.0001 |



|                    |            |         |        |        |
|--------------------|------------|---------|--------|--------|
| <b>cig_l2_3</b>    | -0.00960   | 0.01868 | -0.51  | 0.6073 |
| <b>cig_l1_3</b>    | 0.07103    | 0.01852 | 3.84   | 0.0001 |
| <b>cig_l2_4</b>    | -0.01951   | 0.01658 | -1.18  | 0.2393 |
| <b>cig_l1_4</b>    | 0.03430    | 0.01666 | 2.06   | 0.0395 |
| <b>mvi_l2</b>      | 0.01249    | 0.00293 | 4.26   | <.0001 |
| <b>mvi_l1</b>      | 0.04646    | 0.00300 | 15.50  | <.0001 |
| <b>act_l1_1</b>    | -0.10086   | 0.00442 | -22.84 | <.0001 |
| <b>act_l1_1_ti</b> | 0.02823    | 0.00485 | 5.82   | <.0001 |
| <b>act_l1_2</b>    | -0.04457   | 0.00506 | -8.80  | <.0001 |
| <b>act_l1_2_ti</b> | 0.00934    | 0.00590 | 1.58   | 0.1136 |
| <b>act_l1_3</b>    | -0.01333   | 0.00889 | -1.50  | 0.1336 |
| <b>act_l1_3_ti</b> | -0.02559   | 0.02018 | -1.27  | 0.2048 |
| <b>act_l1_4</b>    | -0.01893   | 0.00574 | -3.30  | 0.0010 |
| <b>act_l1_4_ti</b> | 0.00616    | 0.00548 | 1.12   | 0.2612 |
| <b>act_l1_5</b>    | -0.01499   | 0.00930 | -1.61  | 0.1071 |
| <b>act_l1_5_ti</b> | 0.00454    | 0.03394 | 0.13   | 0.8937 |
| <b>can_l2</b>      | -0.01606   | 0.01242 | -1.29  | 0.1959 |
| <b>can_l1</b>      | 0.00104    | 0.01109 | 0.09   | 0.9254 |
| <b>bmi_l2_1</b>    | -0.05202   | 0.02307 | -2.26  | 0.0241 |
| <b>bmi_l1_1</b>    | 0.01677    | 0.02081 | 0.81   | 0.4205 |
| <b>bmi_l2_2</b>    | -0.03178   | 0.01394 | -2.28  | 0.0226 |
| <b>bmi_l1_2</b>    | 0.01515    | 0.01277 | 1.19   | 0.2356 |
| <b>bmi_l2_3</b>    | -0.01845   | 0.01290 | -1.43  | 0.1525 |
| <b>bmi_l1_3</b>    | 0.00570    | 0.01188 | 0.48   | 0.6311 |
| <b>bmi_l2_4</b>    | -0.00556   | 0.01192 | -0.47  | 0.6410 |
| <b>bmi_l1_4</b>    | 0.00088630 | 0.01102 | 0.08   | 0.9359 |
| <b>bmi_l2_5</b>    | -0.01097   | 0.01051 | -1.04  | 0.2968 |
| <b>bmi_l1_5</b>    | 0.00139    | 0.00983 | 0.14   | 0.8874 |
| <b>chl_l2</b>      | -0.02847   | 0.00606 | -4.70  | <.0001 |
| <b>chl_l1</b>      | 0.05471    | 0.00578 | 9.47   | <.0001 |
| <b>hbp_l2</b>      | -0.01290   | 0.00693 | -1.86  | 0.0629 |
| <b>hbp_l1</b>      | -0.00682   | 0.00676 | -1.01  | 0.3130 |

|                  |          |         |       |        |
|------------------|----------|---------|-------|--------|
| <b>sta_l1</b>    | -0.00474 | 0.00513 | -0.92 | 0.3555 |
| <b>sta_l1_ti</b> | -0.00872 | 0.00577 | -1.51 | 0.1303 |
| <b>asn_l2_1</b>  | -0.00292 | 0.00432 | -0.68 | 0.4990 |
| <b>asn_l1_1</b>  | -0.01567 | 0.00441 | -3.55 | 0.0004 |
| <b>asn_l2_2</b>  | 0.00748  | 0.00426 | 1.75  | 0.0793 |
| <b>asn_l1_2</b>  | -0.00650 | 0.00424 | -1.53 | 0.1251 |
| <b>angcbg_l2</b> | -0.05766 | 0.01935 | -2.98 | 0.0029 |
| <b>angcbg_l1</b> | 0.05487  | 0.01795 | 3.06  | 0.0022 |
| <b>str_l2</b>    | -0.02460 | 0.03760 | -0.65 | 0.5130 |
| <b>str_l1</b>    | -0.03317 | 0.03210 | -1.03 | 0.3014 |
| <b>mi_l2</b>     | -0.01028 | 0.04085 | -0.25 | 0.8013 |
| <b>mi_l1</b>     | -0.00288 | 0.03628 | -0.08 | 0.9368 |
| <b>mnp</b>       | 0.04908  | 0.00669 | 7.34  | <.0001 |
| <b>pmh</b>       | 0.02139  | 0.00425 | 5.03  | <.0001 |
| <b>ost</b>       | 0.02761  | 0.00755 | 3.66  | 0.0003 |
| <b>rpmeats_1</b> | 0.02707  | 0.00538 | 5.03  | <.0001 |
| <b>rpmeats_2</b> | 0.00189  | 0.00479 | 0.39  | 0.6934 |
| <b>rpmeats_3</b> | 0.00238  | 0.00466 | 0.51  | 0.6096 |
| <b>rpmeats_4</b> | 0.00878  | 0.00448 | 1.96  | 0.0499 |
| <b>coff_1</b>    | -0.06133 | 0.00713 | -8.60 | <.0001 |
| <b>coff_2</b>    | -0.04637 | 0.00625 | -7.42 | <.0001 |
| <b>coff_3</b>    | -0.06115 | 0.00671 | -9.11 | <.0001 |
| <b>coff_4</b>    | -0.03541 | 0.00362 | -9.77 | <.0001 |

(L) Logistic model to estimate the probability of soda intake

| <b>Variable</b>  | <b>Log odds ratio</b> | <b>Standard error</b> | <b>Wald chi-square</b> | <b>P value</b> |
|------------------|-----------------------|-----------------------|------------------------|----------------|
| <b>Intercept</b> | 4.3341                | 0.3773                | 131.9271               | <.0001         |
| <b>fhx</b>       | -0.0274               | 0.0164                | 2.7991                 | 0.0943         |
| <b>smkhx</b>     | -0.0802               | 0.0152                | 27.9163                | <.0001         |
| <b>ochx</b>      | 0.00592               | 0.0139                | 0.1811                 | 0.6705         |

|                      |          |          |         |        |
|----------------------|----------|----------|---------|--------|
| <b>employed_1</b>    | -0.0109  | 0.0253   | 0.1870  | 0.6654 |
| <b>employed_2</b>    | 0.0426   | 0.0428   | 0.9870  | 0.3205 |
| <b>employed_3</b>    | 0.00121  | 0.0208   | 0.0034  | 0.9537 |
| <b>employed_4</b>    | 0.0470   | 0.0273   | 2.9754  | 0.0845 |
| <b>employed_5</b>    | 0.00353  | 0.0188   | 0.0354  | 0.8507 |
| <b>employed_6</b>    | 0.0314   | 0.0274   | 1.3169  | 0.2512 |
| <b>employed_miss</b> | -0.0327  | 0.0922   | 0.1262  | 0.7224 |
| <b>mar80</b>         | 0.0255   | 0.0241   | 1.1230  | 0.2893 |
| <b>college</b>       | -0.0353  | 0.0146   | 5.8086  | 0.0159 |
| <b>stress82</b>      | -0.00696 | 0.0151   | 0.2137  | 0.6439 |
| <b>stress82_miss</b> | 0.0727   | 0.0849   | 0.7318  | 0.3923 |
| <b>hhighsch</b>      | 0.0262   | 0.0184   | 2.0106  | 0.1562 |
| <b>hcollege</b>      | 0.00527  | 0.0197   | 0.0717  | 0.7889 |
| <b>hgradsch</b>      | 0.0267   | 0.0206   | 1.6942  | 0.1930 |
| <b>lbmi18_2</b>      | -0.0742  | 0.0163   | 20.6502 | <.0001 |
| <b>lbmi18_3</b>      | -0.0878  | 0.0269   | 10.6395 | 0.0011 |
| <b>lbmi18_4</b>      | -0.1232  | 0.0645   | 3.6420  | 0.0563 |
| <b>baseage</b>       | -0.0355  | 0.0145   | 6.0034  | 0.0143 |
| <b>baseage_sq</b>    | 0.000219 | 0.000141 | 2.4156  | 0.1201 |
| <b>bmi80_1</b>       | -0.0590  | 0.0886   | 0.4441  | 0.5051 |
| <b>bmi80_2</b>       | -0.0664  | 0.0659   | 1.0179  | 0.3130 |
| <b>bmi80_3</b>       | -0.0431  | 0.0637   | 0.4581  | 0.4985 |
| <b>bmi80_4</b>       | 0.0133   | 0.0616   | 0.0469  | 0.8286 |
| <b>bmi80_5</b>       | -0.0233  | 0.0608   | 0.1465  | 0.7019 |
| <b>act80_1</b>       | -0.0197  | 0.0178   | 1.2276  | 0.2679 |
| <b>act80_2</b>       | 0.0339   | 0.0213   | 2.5323  | 0.1115 |
| <b>act80_3</b>       | 0.00993  | 0.0185   | 0.2888  | 0.5910 |
| <b>alc80_1</b>       | 0.1137   | 0.0214   | 28.2675 | <.0001 |
| <b>alc80_2</b>       | 0.1679   | 0.0207   | 65.8531 | <.0001 |
| <b>alc80_3</b>       | 0.1311   | 0.0233   | 31.6660 | <.0001 |
| <b>rpmeats80_1</b>   | -0.0659  | 0.0315   | 4.3883  | 0.0362 |
| <b>rpmeats80_2</b>   | -0.0449  | 0.0214   | 4.4012  | 0.0359 |

|                     |          |        |           |        |
|---------------------|----------|--------|-----------|--------|
| <b>rpmeats80_3</b>  | 0.00678  | 0.0195 | 0.1204    | 0.7286 |
| <b>rpmeats80_4</b>  | -0.0167  | 0.0179 | 0.8790    | 0.3485 |
| <b>coff80_1</b>     | 0.0979   | 0.0191 | 26.2195   | <.0001 |
| <b>coff80_2</b>     | 0.0697   | 0.0284 | 6.0227    | 0.0141 |
| <b>coff80_3</b>     | 0.1089   | 0.0448 | 5.9040    | 0.0151 |
| <b>whgrn80_1</b>    | 0.0414   | 0.0185 | 5.0370    | 0.0248 |
| <b>whgrn80_2</b>    | -0.00620 | 0.0193 | 0.1031    | 0.7481 |
| <b>soda80_1</b>     | -0.9843  | 0.0258 | 1455.1505 | <.0001 |
| <b>soda80_2</b>     | -0.4631  | 0.0254 | 333.3320  | <.0001 |
| <b>soda80_3</b>     | -0.1845  | 0.0269 | 46.8672   | <.0001 |
| <b>soda80_4</b>     | -0.1541  | 0.0274 | 31.6836   | <.0001 |
| <b>cig80_1</b>      | 0.0727   | 0.0500 | 2.1175    | 0.1456 |
| <b>cig80_2</b>      | 0.2038   | 0.0649 | 9.8602    | 0.0017 |
| <b>cig80_3</b>      | 0.0654   | 0.0550 | 1.4111    | 0.2349 |
| <b>cig80_4</b>      | 0.0678   | 0.0484 | 1.9622    | 0.1613 |
| <b>period_4</b>     | 0.6290   | 0.0750 | 70.3962   | <.0001 |
| <b>period_6</b>     | 0.8835   | 0.0250 | 1251.5519 | <.0001 |
| <b>period_8</b>     | 0.6654   | 0.0223 | 889.9665  | <.0001 |
| <b>period_10</b>    | 0.4164   | 0.0200 | 431.6005  | <.0001 |
| <b>mnp_12</b>       | -0.0915  | 0.0353 | 6.7305    | 0.0095 |
| <b>mnp_11</b>       | 0.00550  | 0.0488 | 0.0127    | 0.9103 |
| <b>pmh_12</b>       | 0.0309   | 0.0195 | 2.5073    | 0.1133 |
| <b>pmh_11</b>       | -0.0137  | 0.0232 | 0.3465    | 0.5561 |
| <b>ost_12</b>       | -0.0131  | 0.0367 | 0.1277    | 0.7209 |
| <b>ost_11</b>       | 0.0831   | 0.0451 | 3.3887    | 0.0656 |
| <b>rpmeats_11_1</b> | 0.0300   | 0.0285 | 1.1059    | 0.2930 |
| <b>rpmeats_11_2</b> | 0.0625   | 0.0262 | 5.7020    | 0.0169 |
| <b>rpmeats_11_3</b> | 0.0291   | 0.0257 | 1.2831    | 0.2573 |
| <b>rpmeats_11_4</b> | 0.0231   | 0.0249 | 0.8591    | 0.3540 |
| <b>coff_11_1</b>    | 0.2702   | 0.0352 | 58.8927   | <.0001 |
| <b>coff_11_2</b>    | 0.1492   | 0.0312 | 22.9101   | <.0001 |
| <b>coff_11_3</b>    | 0.1185   | 0.0344 | 11.8761   | 0.0006 |

|                     |         |        |           |        |
|---------------------|---------|--------|-----------|--------|
| <b>coff_l1_4</b>    | 0.0280  | 0.0175 | 2.5424    | 0.1108 |
| <b>whgrn_l1_1</b>   | 0.1431  | 0.0255 | 31.4415   | <.0001 |
| <b>whgrn_l1_2</b>   | 0.1201  | 0.0228 | 27.8560   | <.0001 |
| <b>whgrn_l1_3</b>   | 0.0984  | 0.0211 | 21.7064   | <.0001 |
| <b>whgrn_l1_4</b>   | 0.0686  | 0.0198 | 12.0243   | 0.0005 |
| <b>soda_l1_1</b>    | -3.9963 | 0.0990 | 1628.6880 | <.0001 |
| <b>soda_l1_1_ti</b> | 0.1587  | 0.0384 | 17.0641   | <.0001 |
| <b>soda_l1_2</b>    | -2.3571 | 0.0980 | 578.9727  | <.0001 |
| <b>soda_l1_2_ti</b> | 0.1565  | 0.0381 | 16.8463   | <.0001 |
| <b>soda_l1_3</b>    | -0.9685 | 0.1055 | 84.3102   | <.0001 |
| <b>soda_l1_3_ti</b> | 0.00188 | 0.0411 | 0.0021    | 0.9635 |
| <b>soda_l1_4</b>    | -0.5778 | 0.1152 | 25.1408   | <.0001 |
| <b>soda_l1_4_ti</b> | 0.0313  | 0.0452 | 0.4795    | 0.4887 |
| <b>cal_l1_1</b>     | -0.1402 | 0.0246 | 32.4241   | <.0001 |
| <b>cal_l1_2</b>     | -0.1161 | 0.0229 | 25.6005   | <.0001 |
| <b>cal_l1_3</b>     | -0.0720 | 0.0223 | 10.3846   | 0.0013 |
| <b>cal_l1_4</b>     | -0.0494 | 0.0221 | 5.0120    | 0.0252 |
| <b>alc_l1_1</b>     | 0.0950  | 0.0223 | 18.0921   | <.0001 |
| <b>alc_l1_2</b>     | 0.1515  | 0.0216 | 49.2462   | <.0001 |
| <b>alc_l1_3</b>     | 0.1381  | 0.0242 | 32.4661   | <.0001 |
| <b>cig_l2_1</b>     | 0.1199  | 0.0940 | 1.6265    | 0.2022 |
| <b>cig_l1_1</b>     | 0.1231  | 0.1028 | 1.4336    | 0.2312 |
| <b>cig_l2_2</b>     | 0.1618  | 0.1087 | 2.2164    | 0.1365 |
| <b>cig_l1_2</b>     | 0.0383  | 0.1163 | 0.1083    | 0.7421 |
| <b>cig_l2_3</b>     | 0.1208  | 0.0951 | 1.6123    | 0.2042 |
| <b>cig_l1_3</b>     | 0.1991  | 0.1041 | 3.6594    | 0.0558 |
| <b>cig_l2_4</b>     | 0.0245  | 0.0854 | 0.0824    | 0.7740 |
| <b>cig_l1_4</b>     | 0.1859  | 0.0956 | 3.7810    | 0.0518 |
| <b>mvi_l2</b>       | -0.0415 | 0.0146 | 8.0552    | 0.0045 |
| <b>mvi_l1</b>       | 0.00993 | 0.0150 | 0.4373    | 0.5084 |
| <b>act_l1_1</b>     | 0.1526  | 0.0189 | 65.2088   | <.0001 |
| <b>act_l1_2</b>     | 0.1525  | 0.0219 | 48.5430   | <.0001 |

|                  |          |        |         |        |
|------------------|----------|--------|---------|--------|
| <b>act_l1_3</b>  | 0.2173   | 0.0405 | 28.8393 | <.0001 |
| <b>act_l1_4</b>  | 0.0967   | 0.0245 | 15.5446 | <.0001 |
| <b>act_l1_5</b>  | 0.0694   | 0.0406 | 2.9211  | 0.0874 |
| <b>can_l2</b>    | 0.00316  | 0.0524 | 0.0036  | 0.9520 |
| <b>can_l1</b>    | 0.0235   | 0.0473 | 0.2476  | 0.6188 |
| <b>bmi_l2_1</b>  | 0.2638   | 0.1026 | 6.6075  | 0.0102 |
| <b>bmi_l1_1</b>  | -0.3954  | 0.0957 | 17.0534 | <.0001 |
| <b>bmi_l2_2</b>  | 0.1932   | 0.0708 | 7.4390  | 0.0064 |
| <b>bmi_l1_2</b>  | -0.2525  | 0.0682 | 13.7016 | 0.0002 |
| <b>bmi_l2_3</b>  | 0.1803   | 0.0668 | 7.2930  | 0.0069 |
| <b>bmi_l1_3</b>  | -0.1654  | 0.0644 | 6.5960  | 0.0102 |
| <b>bmi_l2_4</b>  | 0.1588   | 0.0626 | 6.4294  | 0.0112 |
| <b>bmi_l1_4</b>  | -0.0919  | 0.0606 | 2.3017  | 0.1292 |
| <b>bmi_l2_5</b>  | 0.1057   | 0.0560 | 3.5607  | 0.0592 |
| <b>bmi_l1_5</b>  | -0.0370  | 0.0546 | 0.4577  | 0.4987 |
| <b>chl_l2</b>    | -0.0114  | 0.0288 | 0.1555  | 0.6933 |
| <b>chl_l1</b>    | 0.0543   | 0.0280 | 3.7727  | 0.0521 |
| <b>hbp_l2</b>    | 0.0262   | 0.0329 | 0.6347  | 0.4256 |
| <b>hbp_l1</b>    | 0.00415  | 0.0323 | 0.0165  | 0.8976 |
| <b>sta_l1</b>    | -0.0163  | 0.0211 | 0.5973  | 0.4396 |
| <b>sta_l1_ti</b> | 0.0133   | 0.0272 | 0.2406  | 0.6238 |
| <b>asn_l2_1</b>  | -0.0465  | 0.0204 | 5.1769  | 0.0229 |
| <b>asn_l1_1</b>  | 0.0217   | 0.0202 | 1.1553  | 0.2825 |
| <b>asn_l2_2</b>  | 0.0276   | 0.0202 | 1.8576  | 0.1729 |
| <b>asn_l1_2</b>  | 0.0686   | 0.0200 | 11.7211 | 0.0006 |
| <b>angcbg_l2</b> | 0.0231   | 0.0842 | 0.0752  | 0.7840 |
| <b>angcbg_l1</b> | 0.000910 | 0.0788 | 0.0001  | 0.9908 |
| <b>str_l2</b>    | 0.0275   | 0.1477 | 0.0346  | 0.8525 |
| <b>str_l1</b>    | -0.0921  | 0.1271 | 0.5256  | 0.4685 |
| <b>mi_l2</b>     | -0.0472  | 0.1717 | 0.0757  | 0.7833 |
| <b>mi_l1</b>     | 0.2349   | 0.1535 | 2.3417  | 0.1260 |
| <b>mnp</b>       | -0.0180  | 0.0441 | 0.1660  | 0.6837 |

|                  |          |        |          |        |
|------------------|----------|--------|----------|--------|
| <b>pmh</b>       | -0.00072 | 0.0208 | 0.0012   | 0.9723 |
| <b>ost</b>       | -0.0919  | 0.0321 | 8.1673   | 0.0043 |
| <b>rpmeats_1</b> | -0.6330  | 0.0285 | 494.4805 | <.0001 |
| <b>rpmeats_2</b> | -0.3418  | 0.0273 | 157.3510 | <.0001 |
| <b>rpmeats_3</b> | -0.1931  | 0.0274 | 49.8027  | <.0001 |
| <b>rpmeats_4</b> | -0.0786  | 0.0278 | 8.0033   | 0.0047 |
| <b>coff_1</b>    | -0.4640  | 0.0339 | 187.5104 | <.0001 |
| <b>coff_2</b>    | -0.0906  | 0.0303 | 8.9234   | 0.0028 |
| <b>coff_3</b>    | 0.0998   | 0.0337 | 8.7702   | 0.0031 |
| <b>coff_4</b>    | -0.0356  | 0.0184 | 3.7581   | 0.0526 |
| <b>whgrn_1</b>   | -0.0813  | 0.0249 | 10.6321  | 0.0011 |
| <b>whgrn_2</b>   | 0.0224   | 0.0221 | 1.0303   | 0.3101 |
| <b>whgrn_3</b>   | 0.0388   | 0.0206 | 3.5316   | 0.0602 |
| <b>whgrn_4</b>   | 0.0466   | 0.0192 | 5.9039   | 0.0151 |

(M) Log-linear model to estimate the amount of soda intake in women who drink soda

| <b>Variable</b>      | <b>Parameter estimate</b> | <b>Standard error</b> | <b>t value</b> | <b>P value</b> |
|----------------------|---------------------------|-----------------------|----------------|----------------|
| <b>Intercept</b>     | 1.31861                   | 0.10706               | 12.32          | <.0001         |
| <b>fhx</b>           | -0.00156                  | 0.00481               | -0.32          | 0.7462         |
| <b>smkhx</b>         | 0.01629                   | 0.00451               | 3.61           | 0.0003         |
| <b>ochx</b>          | 0.01134                   | 0.00413               | 2.75           | 0.0060         |
| <b>employed_1</b>    | 0.01853                   | 0.00767               | 2.42           | 0.0157         |
| <b>employed_2</b>    | 0.01674                   | 0.01198               | 1.40           | 0.1623         |
| <b>employed_3</b>    | 0.00172                   | 0.00615               | 0.28           | 0.7800         |
| <b>employed_4</b>    | 0.01482                   | 0.00797               | 1.86           | 0.0629         |
| <b>employed_5</b>    | 0.01009                   | 0.00572               | 1.76           | 0.0777         |
| <b>employed_6</b>    | -0.01177                  | 0.00851               | -1.38          | 0.1667         |
| <b>employed_miss</b> | 0.00757                   | 0.02717               | 0.28           | 0.7806         |
| <b>mar80</b>         | -0.01092                  | 0.00732               | -1.49          | 0.1360         |
| <b>college</b>       | 0.00709                   | 0.00437               | 1.62           | 0.1043         |
| <b>stress82</b>      | 0.01153                   | 0.00457               | 2.53           | 0.0115         |

|                      |            |            |        |        |
|----------------------|------------|------------|--------|--------|
| <b>stress82_miss</b> | -0.01598   | 0.02517    | -0.63  | 0.5256 |
| <b>hhighsch</b>      | -0.02021   | 0.00534    | -3.79  | 0.0002 |
| <b>hcollege</b>      | -0.01733   | 0.00579    | -2.99  | 0.0028 |
| <b>hgradsch</b>      | -0.00496   | 0.00613    | -0.81  | 0.4180 |
| <b>lbmi18_2</b>      | -0.01366   | 0.00484    | -2.82  | 0.0047 |
| <b>lbmi18_3</b>      | 0.00433    | 0.00773    | 0.56   | 0.5754 |
| <b>lbmi18_4</b>      | 0.00549    | 0.01841    | 0.30   | 0.7657 |
| <b>baseage</b>       | -0.02575   | 0.00417    | -6.17  | <.0001 |
| <b>baseage_sq</b>    | 0.00015627 | 0.00004125 | 3.79   | 0.0002 |
| <b>bmi80_1</b>       | -0.04853   | 0.02606    | -1.86  | 0.0626 |
| <b>bmi80_2</b>       | -0.04060   | 0.01711    | -2.37  | 0.0176 |
| <b>bmi80_3</b>       | -0.03258   | 0.01631    | -2.00  | 0.0458 |
| <b>bmi80_4</b>       | -0.01791   | 0.01552    | -1.15  | 0.2484 |
| <b>bmi80_5</b>       | -0.00217   | 0.01505    | -0.14  | 0.8854 |
| <b>act80_1</b>       | -0.00738   | 0.00537    | -1.37  | 0.1694 |
| <b>act80_2</b>       | -0.01776   | 0.00631    | -2.82  | 0.0049 |
| <b>act80_3</b>       | -0.01070   | 0.00557    | -1.92  | 0.0545 |
| <b>alc80_1</b>       | -0.03039   | 0.00655    | -4.64  | <.0001 |
| <b>alc80_2</b>       | -0.01007   | 0.00624    | -1.61  | 0.1068 |
| <b>alc80_3</b>       | -0.01236   | 0.00698    | -1.77  | 0.0766 |
| <b>rpmeats80_1</b>   | 0.01503    | 0.01185    | 1.27   | 0.2048 |
| <b>rpmeats80_2</b>   | 0.00549    | 0.00710    | 0.77   | 0.4388 |
| <b>rpmeats80_3</b>   | 0.00755    | 0.00587    | 1.29   | 0.1982 |
| <b>rpmeats80_4</b>   | 0.00850    | 0.00527    | 1.61   | 0.1066 |
| <b>coff80_1</b>      | 0.02901    | 0.00568    | 5.11   | <.0001 |
| <b>coff80_2</b>      | 0.00062767 | 0.00793    | 0.08   | 0.9369 |
| <b>coff80_3</b>      | 0.00429    | 0.01234    | 0.35   | 0.7279 |
| <b>whgrn80_1</b>     | 0.03657    | 0.00573    | 6.39   | <.0001 |
| <b>whgrn80_2</b>     | 0.00423    | 0.00611    | 0.69   | 0.4885 |
| <b>soda80_1</b>      | -0.47346   | 0.00745    | -63.58 | <.0001 |
| <b>soda80_2</b>      | -0.41028   | 0.00618    | -66.40 | <.0001 |
| <b>soda80_3</b>      | -0.27980   | 0.00601    | -46.55 | <.0001 |



|                     |          |         |        |        |
|---------------------|----------|---------|--------|--------|
| <b>soda80_4</b>     | -0.16337 | 0.00575 | -28.43 | <.0001 |
| <b>cig80_1</b>      | -0.10945 | 0.01551 | -7.05  | <.0001 |
| <b>cig80_2</b>      | -0.11226 | 0.01933 | -5.81  | <.0001 |
| <b>cig80_3</b>      | -0.08244 | 0.01697 | -4.86  | <.0001 |
| <b>cig80_4</b>      | -0.04796 | 0.01507 | -3.18  | 0.0015 |
| <b>period_4</b>     | 0.23502  | 0.01154 | 20.37  | <.0001 |
| <b>period_6</b>     | 0.26636  | 0.00782 | 34.05  | <.0001 |
| <b>period_8</b>     | 0.19946  | 0.00723 | 27.59  | <.0001 |
| <b>period_10</b>    | 0.14018  | 0.00685 | 20.47  | <.0001 |
| <b>mnp_l2</b>       | -0.00136 | 0.00878 | -0.15  | 0.8772 |
| <b>mnp_l1</b>       | -0.02968 | 0.01164 | -2.55  | 0.0108 |
| <b>pmh_l2</b>       | 0.01797  | 0.00594 | 3.02   | 0.0025 |
| <b>pmh_l1</b>       | -0.00691 | 0.00685 | -1.01  | 0.3131 |
| <b>ost_l2</b>       | 0.00927  | 0.01226 | 0.76   | 0.4497 |
| <b>ost_l1</b>       | 0.01807  | 0.01497 | 1.21   | 0.2274 |
| <b>rpmeats_l1_1</b> | 0.04206  | 0.00833 | 5.05   | <.0001 |
| <b>rpmeats_l1_2</b> | 0.01482  | 0.00712 | 2.08   | 0.0373 |
| <b>rpmeats_l1_3</b> | 0.01278  | 0.00670 | 1.91   | 0.0563 |
| <b>rpmeats_l1_4</b> | 0.01426  | 0.00623 | 2.29   | 0.0221 |
| <b>coff_l1_1</b>    | 0.13421  | 0.01075 | 12.49  | <.0001 |
| <b>coff_l1_2</b>    | 0.05397  | 0.00927 | 5.82   | <.0001 |
| <b>coff_l1_3</b>    | 0.03826  | 0.00983 | 3.89   | <.0001 |
| <b>coff_l1_4</b>    | 0.02767  | 0.00511 | 5.41   | <.0001 |
| <b>whgrn_l1_1</b>   | 0.08900  | 0.00750 | 11.87  | <.0001 |
| <b>whgrn_l1_2</b>   | 0.06202  | 0.00672 | 9.23   | <.0001 |
| <b>whgrn_l1_3</b>   | 0.04219  | 0.00635 | 6.65   | <.0001 |
| <b>whgrn_l1_4</b>   | 0.02915  | 0.00608 | 4.79   | <.0001 |
| <b>soda_l1_1</b>    | -1.80281 | 0.02646 | -68.12 | <.0001 |
| <b>soda_l1_1_ti</b> | 0.10504  | 0.01012 | 10.38  | <.0001 |
| <b>soda_l1_2</b>    | -1.64547 | 0.01694 | -97.11 | <.0001 |
| <b>soda_l1_2_ti</b> | 0.06541  | 0.00641 | 10.21  | <.0001 |
| <b>soda_l1_3</b>    | -1.09191 | 0.01654 | -66.02 | <.0001 |

|                     |             |         |        |        |
|---------------------|-------------|---------|--------|--------|
| <b>soda_l1_3_ti</b> | 0.06249     | 0.00623 | 10.03  | <.0001 |
| <b>soda_l1_4</b>    | -0.53931    | 0.01672 | -32.26 | <.0001 |
| <b>soda_l1_4_ti</b> | 0.02355     | 0.00633 | 3.72   | 0.0002 |
| <b>cal_l1_1</b>     | -0.02339    | 0.00723 | -3.23  | 0.0012 |
| <b>cal_l1_2</b>     | -0.03931    | 0.00650 | -6.05  | <.0001 |
| <b>cal_l1_3</b>     | -0.03498    | 0.00612 | -5.71  | <.0001 |
| <b>cal_l1_4</b>     | -0.03380    | 0.00586 | -5.77  | <.0001 |
| <b>alc_l1_1</b>     | 0.03538     | 0.00689 | 5.13   | <.0001 |
| <b>alc_l1_2</b>     | 0.01940     | 0.00657 | 2.95   | 0.0031 |
| <b>alc_l1_3</b>     | -0.00978    | 0.00734 | -1.33  | 0.1826 |
| <b>cig_l2_1</b>     | -0.04847    | 0.02753 | -1.76  | 0.0783 |
| <b>cig_l1_1</b>     | -0.00431    | 0.03032 | -0.14  | 0.8870 |
| <b>cig_l2_2</b>     | -0.02961    | 0.03163 | -0.94  | 0.3491 |
| <b>cig_l1_2</b>     | -0.01695    | 0.03429 | -0.49  | 0.6211 |
| <b>cig_l2_3</b>     | -0.05023    | 0.02803 | -1.79  | 0.0732 |
| <b>cig_l1_3</b>     | -0.00509    | 0.03085 | -0.16  | 0.8690 |
| <b>cig_l2_4</b>     | -0.04494    | 0.02520 | -1.78  | 0.0745 |
| <b>cig_l1_4</b>     | -0.01056    | 0.02839 | -0.37  | 0.7100 |
| <b>mvi_l2</b>       | -0.00086672 | 0.00414 | -0.21  | 0.8343 |
| <b>mvi_l1</b>       | -0.00896    | 0.00425 | -2.11  | 0.0349 |
| <b>act_l1_1</b>     | 0.02089     | 0.00586 | 3.56   | 0.0004 |
| <b>act_l1_2</b>     | 0.00374     | 0.00667 | 0.56   | 0.5750 |
| <b>act_l1_3</b>     | -0.01079    | 0.01156 | -0.93  | 0.3505 |
| <b>act_l1_4</b>     | -0.01817    | 0.00759 | -2.39  | 0.0166 |
| <b>act_l1_5</b>     | -0.03386    | 0.01222 | -2.77  | 0.0056 |
| <b>can_l2</b>       | -0.00680    | 0.01635 | -0.42  | 0.6777 |
| <b>can_l1</b>       | 0.01458     | 0.01455 | 1.00   | 0.3162 |
| <b>bmi_l2_1</b>     | 0.03304     | 0.03351 | 0.99   | 0.3242 |
| <b>bmi_l1_1</b>     | -0.07556    | 0.03149 | -2.40  | 0.0164 |
| <b>bmi_l2_2</b>     | 0.00043506  | 0.01891 | 0.02   | 0.9816 |
| <b>bmi_l1_2</b>     | -0.06964    | 0.01811 | -3.85  | 0.0001 |
| <b>bmi_l2_3</b>     | 0.00793     | 0.01736 | 0.46   | 0.6478 |

|                  |            |         |        |        |
|------------------|------------|---------|--------|--------|
| <b>bmi_l1_3</b>  | -0.04418   | 0.01661 | -2.66  | 0.0078 |
| <b>bmi_l2_4</b>  | 0.00898    | 0.01596 | 0.56   | 0.5737 |
| <b>bmi_l1_4</b>  | -0.02790   | 0.01527 | -1.83  | 0.0677 |
| <b>bmi_l2_5</b>  | -0.00196   | 0.01404 | -0.14  | 0.8892 |
| <b>bmi_l1_5</b>  | -0.00492   | 0.01355 | -0.36  | 0.7162 |
| <b>chl_l2</b>    | -0.00749   | 0.00805 | -0.93  | 0.3519 |
| <b>chl_l1</b>    | 0.01527    | 0.00770 | 1.98   | 0.0473 |
| <b>hbp_l2</b>    | 0.01527    | 0.00979 | 1.56   | 0.1186 |
| <b>hbp_l1</b>    | -0.01228   | 0.00957 | -1.28  | 0.1997 |
| <b>sta_l1</b>    | 0.00808    | 0.00685 | 1.18   | 0.2385 |
| <b>sta_l1_ti</b> | 0.00812    | 0.00740 | 1.10   | 0.2720 |
| <b>asn_l2_1</b>  | -0.01920   | 0.00626 | -3.07  | 0.0022 |
| <b>asn_l1_1</b>  | 0.00020491 | 0.00622 | 0.03   | 0.9737 |
| <b>asn_l2_2</b>  | -0.01738   | 0.00608 | -2.86  | 0.0043 |
| <b>asn_l1_2</b>  | -0.00807   | 0.00603 | -1.34  | 0.1812 |
| <b>angcbg_l2</b> | -0.00532   | 0.02528 | -0.21  | 0.8332 |
| <b>angcbg_l1</b> | 0.02516    | 0.02341 | 1.07   | 0.2825 |
| <b>str_l2</b>    | 0.05048    | 0.05070 | 1.00   | 0.3194 |
| <b>str_l1</b>    | 0.00305    | 0.04317 | 0.07   | 0.9436 |
| <b>mi_l2</b>     | -0.01420   | 0.05411 | -0.26  | 0.7930 |
| <b>mi_l1</b>     | 0.06776    | 0.04796 | 1.41   | 0.1577 |
| <b>mnp</b>       | 0.00654    | 0.01020 | 0.64   | 0.5218 |
| <b>pmh</b>       | -0.02298   | 0.00597 | -3.85  | 0.0001 |
| <b>ost</b>       | -0.01487   | 0.01059 | -1.40  | 0.1604 |
| <b>rpmeats_1</b> | -0.24588   | 0.00782 | -31.43 | <.0001 |
| <b>rpmeats_2</b> | -0.18852   | 0.00702 | -26.84 | <.0001 |
| <b>rpmeats_3</b> | -0.12594   | 0.00680 | -18.52 | <.0001 |
| <b>rpmeats_4</b> | -0.06914   | 0.00665 | -10.40 | <.0001 |
| <b>coff_1</b>    | -0.01593   | 0.01052 | -1.52  | 0.1297 |
| <b>coff_2</b>    | -0.05574   | 0.00897 | -6.21  | <.0001 |
| <b>coff_3</b>    | -0.01420   | 0.00953 | -1.49  | 0.1361 |
| <b>coff_4</b>    | -0.00250   | 0.00531 | -0.47  | 0.6384 |

|                |          |         |       |        |
|----------------|----------|---------|-------|--------|
| <b>whgrn_1</b> | -0.03718 | 0.00734 | -5.07 | <.0001 |
| <b>whgrn_2</b> | -0.04273 | 0.00651 | -6.56 | <.0001 |
| <b>whgrn_3</b> | -0.04752 | 0.00616 | -7.72 | <.0001 |
| <b>whgrn_4</b> | -0.03140 | 0.00586 | -5.35 | <.0001 |

(N) Linear model to estimate the amount of total calories in diet

| <b>Variable</b>      | <b>Parameter estimate</b> | <b>Standard error</b> | <b>t value</b> | <b>P value</b> |
|----------------------|---------------------------|-----------------------|----------------|----------------|
| <b>Intercept</b>     | 3108.07399                | 33.68155              | 92.28          | <.0001         |
| <b>fhx</b>           | -3.87927                  | 1.54379               | -2.51          | 0.0120         |
| <b>smkhx</b>         | -3.79758                  | 1.44798               | -2.62          | 0.0087         |
| <b>ochx</b>          | -14.36500                 | 1.32363               | -10.85         | <.0001         |
| <b>employed_1</b>    | -17.43626                 | 2.44548               | -7.13          | <.0001         |
| <b>employed_2</b>    | -11.94372                 | 3.88760               | -3.07          | 0.0021         |
| <b>employed_3</b>    | -10.72159                 | 1.97103               | -5.44          | <.0001         |
| <b>employed_4</b>    | -12.05768                 | 2.56914               | -4.69          | <.0001         |
| <b>employed_5</b>    | -12.63207                 | 1.82413               | -6.92          | <.0001         |
| <b>employed_6</b>    | -3.61795                  | 2.70258               | -1.34          | 0.1807         |
| <b>employed_miss</b> | 1.60473                   | 8.69684               | 0.18           | 0.8536         |
| <b>mar80</b>         | -1.43421                  | 2.31330               | -0.62          | 0.5353         |
| <b>college</b>       | 7.06069                   | 1.40433               | 5.03           | <.0001         |
| <b>stress82</b>      | 9.29439                   | 1.46083               | 6.36           | <.0001         |
| <b>stress82_miss</b> | 7.49046                   | 8.06163               | 0.93           | 0.3528         |
| <b>hhighsch</b>      | 0.06226                   | 1.69476               | 0.04           | 0.9707         |
| <b>hcollege</b>      | 7.93249                   | 1.84078               | 4.31           | <.0001         |
| <b>hgradsch</b>      | 16.61551                  | 1.94777               | 8.53           | <.0001         |
| <b>lbmi18_2</b>      | -7.67516                  | 1.54947               | -4.95          | <.0001         |
| <b>lbmi18_3</b>      | -16.22574                 | 2.47859               | -6.55          | <.0001         |
| <b>lbmi18_4</b>      | -33.78870                 | 5.85045               | -5.78          | <.0001         |
| <b>baseage</b>       | -12.25424                 | 1.31037               | -9.35          | <.0001         |
| <b>baseage_sq</b>    | 0.09632                   | 0.01294               | 7.44           | <.0001         |

|                    |            |         |        |        |
|--------------------|------------|---------|--------|--------|
| <b>bmi80_1</b>     | -12.59242  | 8.80962 | -1.43  | 0.1529 |
| <b>bmi80_2</b>     | -15.33693  | 5.88611 | -2.61  | 0.0092 |
| <b>bmi80_3</b>     | -10.59554  | 5.59776 | -1.89  | 0.0584 |
| <b>bmi80_4</b>     | -4.59386   | 5.31228 | -0.86  | 0.3872 |
| <b>bmi80_5</b>     | 1.93936    | 5.10963 | 0.38   | 0.7043 |
| <b>act80_1</b>     | -7.46702   | 1.91020 | -3.91  | <.0001 |
| <b>act80_2</b>     | -4.65336   | 2.25377 | -2.06  | 0.0390 |
| <b>act80_3</b>     | -3.45498   | 1.98286 | -1.74  | 0.0814 |
| <b>alc80_1</b>     | -28.15325  | 2.14538 | -13.12 | <.0001 |
| <b>alc80_2</b>     | -19.67507  | 2.03871 | -9.65  | <.0001 |
| <b>alc80_3</b>     | -15.26925  | 2.25597 | -6.77  | <.0001 |
| <b>rpmeats80_1</b> | -2.23929   | 3.57476 | -0.63  | 0.5310 |
| <b>rpmeats80_2</b> | -20.45000  | 2.22661 | -9.18  | <.0001 |
| <b>rpmeats80_3</b> | -9.52604   | 1.88822 | -5.04  | <.0001 |
| <b>rpmeats80_4</b> | -4.84181   | 1.69723 | -2.85  | 0.0043 |
| <b>coff80_1</b>    | 9.20197    | 1.84336 | 4.99   | <.0001 |
| <b>coff80_2</b>    | 11.09198   | 2.58901 | 4.28   | <.0001 |
| <b>coff80_3</b>    | 4.20772    | 4.00605 | 1.05   | 0.2936 |
| <b>whgrn80_1</b>   | -31.48717  | 1.83174 | -17.19 | <.0001 |
| <b>whgrn80_2</b>   | -16.11636  | 1.93770 | -8.32  | <.0001 |
| <b>soda80_1</b>    | -12.26386  | 2.36484 | -5.19  | <.0001 |
| <b>soda80_2</b>    | -13.49568  | 2.07308 | -6.51  | <.0001 |
| <b>soda80_3</b>    | -10.36974  | 2.03653 | -5.09  | <.0001 |
| <b>soda80_4</b>    | -14.60941  | 1.94507 | -7.51  | <.0001 |
| <b>cig80_1</b>     | 9.45070    | 5.34411 | 1.77   | 0.0770 |
| <b>cig80_2</b>     | 18.41689   | 6.65484 | 2.77   | 0.0057 |
| <b>cig80_3</b>     | 2.62940    | 5.81566 | 0.45   | 0.6512 |
| <b>cig80_4</b>     | -3.88457   | 5.15145 | -0.75  | 0.4508 |
| <b>period_2</b>    | -127.59907 | 7.96335 | -16.02 | <.0001 |
| <b>period_4</b>    | -9.79377   | 4.21037 | -2.33  | 0.0200 |
| <b>period_6</b>    | 10.21206   | 2.69326 | 3.79   | 0.0001 |
| <b>period_8</b>    | 60.66376   | 2.49493 | 24.31  | <.0001 |

|                        |           |         |        |        |
|------------------------|-----------|---------|--------|--------|
| <b>period_10</b>       | 11.32670  | 2.35264 | 4.81   | <.0001 |
| <b>mnp_l2</b>          | -0.89991  | 2.82200 | -0.32  | 0.7498 |
| <b>mnp_l1</b>          | -2.41534  | 3.70274 | -0.65  | 0.5142 |
| <b>pmh_l2</b>          | -0.47106  | 2.00689 | -0.23  | 0.8144 |
| <b>pmh_l1</b>          | 3.02357   | 2.29520 | 1.32   | 0.1877 |
| <b>ost_l2</b>          | 4.27674   | 4.10383 | 1.04   | 0.2973 |
| <b>ost_l1</b>          | 2.99609   | 4.98056 | 0.60   | 0.5475 |
| <b>rpmeats_l1_1</b>    | 247.59724 | 6.02749 | 41.08  | <.0001 |
| <b>rpmeats_l1_1_ti</b> | -24.19979 | 3.15762 | -7.66  | <.0001 |
| <b>rpmeats_l1_2</b>    | 205.17409 | 4.63272 | 44.29  | <.0001 |
| <b>rpmeats_l1_2_ti</b> | -22.46402 | 2.53238 | -8.87  | <.0001 |
| <b>rpmeats_l1_3</b>    | 159.68362 | 4.33523 | 36.83  | <.0001 |
| <b>rpmeats_l1_3_ti</b> | -19.24518 | 2.41091 | -7.98  | <.0001 |
| <b>rpmeats_l1_4</b>    | 88.62769  | 3.70952 | 23.89  | <.0001 |
| <b>rpmeats_l1_4_ti</b> | -9.42371  | 2.13507 | -4.41  | <.0001 |
| <b>coff_l1_1</b>       | 58.19719  | 5.12997 | 11.34  | <.0001 |
| <b>coff_l1_1_ti</b>    | -10.14469 | 2.50228 | -4.05  | <.0001 |
| <b>coff_l1_2</b>       | 42.08942  | 6.18390 | 6.81   | <.0001 |
| <b>coff_l1_2_ti</b>    | -4.86430  | 3.25185 | -1.50  | 0.1347 |
| <b>coff_l1_3</b>       | 44.32385  | 7.07060 | 6.27   | <.0001 |
| <b>coff_l1_3_ti</b>    | -7.51462  | 3.82930 | -1.96  | 0.0497 |
| <b>coff_l1_4</b>       | 23.29373  | 3.21521 | 7.24   | <.0001 |
| <b>coff_l1_4_ti</b>    | -4.97223  | 1.73509 | -2.87  | 0.0042 |
| <b>whgrn_l1_1</b>      | 174.52408 | 4.86775 | 35.85  | <.0001 |
| <b>whgrn_l1_1_ti</b>   | -36.34889 | 2.60684 | -13.94 | <.0001 |
| <b>whgrn_l1_2</b>      | 147.39762 | 4.81824 | 30.59  | <.0001 |
| <b>whgrn_l1_2_ti</b>   | -32.25288 | 2.59977 | -12.41 | <.0001 |
| <b>whgrn_l1_3</b>      | 106.39186 | 4.99631 | 21.29  | <.0001 |
| <b>whgrn_l1_3_ti</b>   | -21.20444 | 2.68556 | -7.90  | <.0001 |
| <b>whgrn_l1_4</b>      | 79.00054  | 5.09440 | 15.51  | <.0001 |
| <b>whgrn_l1_4_ti</b>   | -19.36498 | 2.73695 | -7.08  | <.0001 |
| <b>soda_l1_1</b>       | 97.07439  | 7.71635 | 12.58  | <.0001 |

|                     |            |         |         |        |
|---------------------|------------|---------|---------|--------|
| <b>soda_l1_1_ti</b> | -0.37076   | 2.90954 | -0.13   | 0.8986 |
| <b>soda_l1_2</b>    | 95.91439   | 6.38738 | 15.02   | <.0001 |
| <b>soda_l1_2_ti</b> | -6.54021   | 2.37901 | -2.75   | 0.0060 |
| <b>soda_l1_3</b>    | 80.11463   | 6.39058 | 12.54   | <.0001 |
| <b>soda_l1_3_ti</b> | -7.48491   | 2.38097 | -3.14   | 0.0017 |
| <b>soda_l1_4</b>    | 48.03070   | 6.45975 | 7.44    | <.0001 |
| <b>soda_l1_4_ti</b> | -5.18394   | 2.43624 | -2.13   | 0.0334 |
| <b>cal_l1_1</b>     | -931.55703 | 5.06343 | -183.98 | <.0001 |
| <b>cal_l1_1_ti</b>  | 45.89098   | 2.82741 | 16.23   | <.0001 |
| <b>cal_l1_2</b>     | -693.39991 | 4.63443 | -149.62 | <.0001 |
| <b>cal_l1_2_ti</b>  | 32.33567   | 2.58809 | 12.49   | <.0001 |
| <b>cal_l1_3</b>     | -519.21778 | 4.45315 | -116.60 | <.0001 |
| <b>cal_l1_3_ti</b>  | 21.92525   | 2.48367 | 8.83    | <.0001 |
| <b>cal_l1_4</b>     | -327.23584 | 4.31339 | -75.87  | <.0001 |
| <b>cal_l1_4_ti</b>  | 11.96463   | 2.40532 | 4.97    | <.0001 |
| <b>alc_l1_1</b>     | 1.11307    | 3.98385 | 0.28    | 0.7799 |
| <b>alc_l1_1_ti</b>  | -10.14449  | 2.03400 | -4.99   | <.0001 |
| <b>alc_l1_2</b>     | 8.90924    | 4.00856 | 2.22    | 0.0262 |
| <b>alc_l1_2_ti</b>  | -9.72137   | 2.15024 | -4.52   | <.0001 |
| <b>alc_l1_3</b>     | 0.75663    | 4.84888 | 0.16    | 0.8760 |
| <b>alc_l1_3_ti</b>  | -4.51986   | 2.69774 | -1.68   | 0.0939 |
| <b>cig_l2_1</b>     | 4.54855    | 8.39233 | 0.54    | 0.5878 |
| <b>cig_l1_1</b>     | -6.66441   | 8.29193 | -0.80   | 0.4216 |
| <b>cig_l2_2</b>     | 7.57377    | 9.77128 | 0.78    | 0.4383 |
| <b>cig_l1_2</b>     | -11.72168  | 9.63778 | -1.22   | 0.2239 |
| <b>cig_l2_3</b>     | 3.71542    | 8.58740 | 0.43    | 0.6653 |
| <b>cig_l1_3</b>     | -11.52225  | 8.48070 | -1.36   | 0.1743 |
| <b>cig_l2_4</b>     | 7.60084    | 7.59818 | 1.00    | 0.3171 |
| <b>cig_l1_4</b>     | -13.33815  | 7.60724 | -1.75   | 0.0795 |
| <b>mvi_l2</b>       | 1.65117    | 1.36713 | 1.21    | 0.2271 |
| <b>mvi_l1</b>       | 4.26037    | 1.39901 | 3.05    | 0.0023 |
| <b>act_l1_1</b>     | -24.08674  | 2.06522 | -11.66  | <.0001 |

|                    |           |          |       |        |
|--------------------|-----------|----------|-------|--------|
| <b>act_l1_1_ti</b> | 6.28064   | 2.25193  | 2.79  | 0.0053 |
| <b>act_l1_2</b>    | -20.38349 | 2.36827  | -8.61 | <.0001 |
| <b>act_l1_2_ti</b> | 6.29505   | 2.74642  | 2.29  | 0.0219 |
| <b>act_l1_3</b>    | -11.80974 | 4.16608  | -2.83 | 0.0046 |
| <b>act_l1_3_ti</b> | 0.22308   | 9.25503  | 0.02  | 0.9808 |
| <b>act_l1_4</b>    | -18.15648 | 2.68901  | -6.75 | <.0001 |
| <b>act_l1_4_ti</b> | 3.79940   | 2.55364  | 1.49  | 0.1368 |
| <b>act_l1_5</b>    | -8.10037  | 4.36099  | -1.86 | 0.0632 |
| <b>act_l1_5_ti</b> | -2.11620  | 15.62645 | -0.14 | 0.8923 |
| <b>can_l2</b>      | -2.70381  | 5.78500  | -0.47 | 0.6402 |
| <b>can_l1</b>      | 1.63135   | 5.16454  | 0.32  | 0.7521 |
| <b>bmi_l2_1</b>    | 30.34753  | 10.67415 | 2.84  | 0.0045 |
| <b>bmi_l1_1</b>    | 19.78679  | 9.61758  | 2.06  | 0.0397 |
| <b>bmi_l2_2</b>    | 28.52281  | 6.49567  | 4.39  | <.0001 |
| <b>bmi_l1_2</b>    | -6.98021  | 5.95009  | -1.17 | 0.2407 |
| <b>bmi_l2_3</b>    | 25.74860  | 6.01439  | 4.28  | <.0001 |
| <b>bmi_l1_3</b>    | -14.86689 | 5.53605  | -2.69 | 0.0072 |
| <b>bmi_l2_4</b>    | 21.54243  | 5.55859  | 3.88  | 0.0001 |
| <b>bmi_l1_4</b>    | -19.41753 | 5.13354  | -3.78 | 0.0002 |
| <b>bmi_l2_5</b>    | 8.20974   | 4.90149  | 1.67  | 0.0939 |
| <b>bmi_l1_5</b>    | -12.80882 | 4.58573  | -2.79 | 0.0052 |
| <b>chl_l2</b>      | 1.19521   | 2.82579  | 0.42  | 0.6723 |
| <b>chl_l1</b>      | -2.12066  | 2.69585  | -0.79 | 0.4315 |
| <b>hbp_l2</b>      | 5.33083   | 3.22968  | 1.65  | 0.0988 |
| <b>hbp_l1</b>      | -9.16318  | 3.14668  | -2.91 | 0.0036 |
| <b>sta_l1</b>      | -16.48508 | 2.39312  | -6.89 | <.0001 |
| <b>sta_l1_ti</b>   | -2.51625  | 2.69604  | -0.93 | 0.3507 |
| <b>asn_l2_1</b>    | -6.61839  | 2.01226  | -3.29 | 0.0010 |
| <b>asn_l1_1</b>    | -2.05499  | 2.05700  | -1.00 | 0.3178 |
| <b>asn_l2_2</b>    | -3.40982  | 1.98645  | -1.72 | 0.0861 |
| <b>asn_l1_2</b>    | 3.59505   | 1.97617  | 1.82  | 0.0689 |
| <b>angcbg_l2</b>   | 7.92603   | 9.02314  | 0.88  | 0.3797 |



|                  |            |          |         |        |
|------------------|------------|----------|---------|--------|
| <b>angcbg_l1</b> | -0.82889   | 8.37504  | -0.10   | 0.9212 |
| <b>str_l2</b>    | 24.24871   | 17.40727 | 1.39    | 0.1636 |
| <b>str_l1</b>    | -9.67273   | 14.86798 | -0.65   | 0.5153 |
| <b>mi_l2</b>     | 7.98318    | 19.02996 | 0.42    | 0.6748 |
| <b>mi_l1</b>     | -12.64695  | 16.89311 | -0.75   | 0.4541 |
| <b>mnp</b>       | 31.12857   | 3.11870  | 9.98    | <.0001 |
| <b>pmh</b>       | -11.99619  | 1.98670  | -6.04   | <.0001 |
| <b>ost</b>       | 5.57053    | 3.51732  | 1.58    | 0.1133 |
| <b>rpmeats_1</b> | -557.69162 | 2.50964  | -222.22 | <.0001 |
| <b>rpmeats_2</b> | -444.89725 | 2.23533  | -199.03 | <.0001 |
| <b>rpmeats_3</b> | -337.94057 | 2.17374  | -155.46 | <.0001 |
| <b>rpmeats_4</b> | -223.40092 | 2.08397  | -107.20 | <.0001 |
| <b>coff_1</b>    | -83.04493  | 3.32066  | -25.01  | <.0001 |
| <b>coff_2</b>    | -72.43192  | 2.91769  | -24.83  | <.0001 |
| <b>coff_3</b>    | -70.59085  | 3.13470  | -22.52  | <.0001 |
| <b>coff_4</b>    | -40.71152  | 1.69323  | -24.04  | <.0001 |
| <b>whgrn_1</b>   | -397.97861 | 2.34775  | -169.51 | <.0001 |
| <b>whgrn_2</b>   | -328.94269 | 2.10731  | -156.10 | <.0001 |
| <b>whgrn_3</b>   | -246.30668 | 2.00395  | -122.91 | <.0001 |
| <b>whgrn_4</b>   | -162.55259 | 1.91747  | -84.77  | <.0001 |
| <b>soda_1</b>    | -239.33007 | 2.98577  | -80.16  | <.0001 |
| <b>soda_1_ti</b> | 59.76585   | 4.58243  | 13.04   | <.0001 |
| <b>soda_2</b>    | -200.84054 | 2.51887  | -79.73  | <.0001 |
| <b>soda_2_ti</b> | 49.67929   | 3.79483  | 13.09   | <.0001 |
| <b>soda_3</b>    | -147.06389 | 2.41467  | -60.90  | <.0001 |
| <b>soda_3_ti</b> | 31.57361   | 3.81317  | 8.28    | <.0001 |
| <b>soda_4</b>    | -112.36259 | 2.31040  | -48.63  | <.0001 |
| <b>soda_4_ti</b> | 29.47921   | 3.90649  | 7.55    | <.0001 |

(O) Logistic model to estimate the probability of drinking alcohol

| <b>Variable</b>      | <b>Log odds ratio</b> | <b>Standard error</b> | <b>Wald chi-square</b> | <b>P value</b> |
|----------------------|-----------------------|-----------------------|------------------------|----------------|
| <b>Intercept</b>     | 3.3506                | 0.2868                | 136.4919               | <.0001         |
| <b>fhx</b>           | -0.0428               | 0.0130                | 10.8659                | 0.0010         |
| <b>smkhx</b>         | 0.2480                | 0.0123                | 404.4534               | <.0001         |
| <b>ochx</b>          | 0.0593                | 0.0113                | 27.6405                | <.0001         |
| <b>employed_1</b>    | 0.1103                | 0.0211                | 27.4103                | <.0001         |
| <b>employed_2</b>    | 0.0970                | 0.0333                | 8.4649                 | 0.0036         |
| <b>employed_3</b>    | 0.0343                | 0.0167                | 4.2421                 | 0.0394         |
| <b>employed_4</b>    | 0.1100                | 0.0222                | 24.5163                | <.0001         |
| <b>employed_5</b>    | 0.1034                | 0.0156                | 43.8908                | <.0001         |
| <b>employed_6</b>    | 0.0659                | 0.0236                | 7.7814                 | 0.0053         |
| <b>employed_miss</b> | -0.1072               | 0.0746                | 2.0634                 | 0.1509         |
| <b>mar80</b>         | 0.1222                | 0.0198                | 38.0179                | <.0001         |
| <b>college</b>       | 0.1115                | 0.0121                | 84.4828                | <.0001         |
| <b>stress82</b>      | -0.0395               | 0.0125                | 9.9412                 | 0.0016         |
| <b>stress82_miss</b> | 0.0779                | 0.0691                | 1.2703                 | 0.2597         |
| <b>hhighsch</b>      | -0.1543               | 0.0142                | 118.4168               | <.0001         |
| <b>hcollege</b>      | 0.0548                | 0.0157                | 12.1209                | 0.0005         |
| <b>hgradsch</b>      | 0.1098                | 0.0169                | 42.3544                | <.0001         |
| <b>lbmi18_2</b>      | -0.0184               | 0.0132                | 1.9589                 | 0.1616         |
| <b>lbmi18_3</b>      | -0.0464               | 0.0205                | 5.1162                 | 0.0237         |
| <b>lbmi18_4</b>      | -0.1146               | 0.0480                | 5.6916                 | 0.0170         |
| <b>baseage</b>       | -0.0289               | 0.0111                | 6.7539                 | 0.0094         |
| <b>baseage_sq</b>    | -0.00003              | 0.000110              | 0.0598                 | 0.8067         |
| <b>bmi80_1</b>       | 0.2825                | 0.0738                | 14.6375                | 0.0001         |
| <b>bmi80_2</b>       | 0.2760                | 0.0476                | 33.5834                | <.0001         |
| <b>bmi80_3</b>       | 0.2352                | 0.0451                | 27.2196                | <.0001         |
| <b>bmi80_4</b>       | 0.1501                | 0.0426                | 12.4211                | 0.0004         |
| <b>bmi80_5</b>       | 0.0441                | 0.0410                | 1.1538                 | 0.2828         |
| <b>act80_1</b>       | 0.0333                | 0.0162                | 4.2389                 | 0.0395         |
| <b>act80_2</b>       | 0.0372                | 0.0191                | 3.7994                 | 0.0513         |

|                    |         |        |           |        |
|--------------------|---------|--------|-----------|--------|
| <b>act80_3</b>     | 0.0567  | 0.0169 | 11.1932   | 0.0008 |
| <b>alc80_1</b>     | -1.0626 | 0.0184 | 3320.4055 | <.0001 |
| <b>alc80_2</b>     | -0.0680 | 0.0190 | 12.7393   | 0.0004 |
| <b>alc80_3</b>     | 0.0925  | 0.0237 | 15.1862   | <.0001 |
| <b>rpmeats80_1</b> | -0.0569 | 0.0302 | 3.5489    | 0.0596 |
| <b>rpmeats80_2</b> | 0.0870  | 0.0190 | 21.0754   | <.0001 |
| <b>rpmeats80_3</b> | 0.0683  | 0.0162 | 17.8259   | <.0001 |
| <b>rpmeats80_4</b> | 0.0130  | 0.0145 | 0.8057    | 0.3694 |
| <b>coff80_1</b>    | -0.0411 | 0.0153 | 7.2198    | 0.0072 |
| <b>coff80_2</b>    | -0.0288 | 0.0216 | 1.7849    | 0.1816 |
| <b>coff80_3</b>    | -0.0934 | 0.0335 | 7.7956    | 0.0052 |
| <b>whgrn80_1</b>   | -0.0164 | 0.0156 | 1.1040    | 0.2934 |
| <b>whgrn80_2</b>   | 0.0242  | 0.0166 | 2.1452    | 0.1430 |
| <b>soda80_1</b>    | 0.1119  | 0.0203 | 30.3379   | <.0001 |
| <b>soda80_2</b>    | 0.0809  | 0.0174 | 21.5677   | <.0001 |
| <b>soda80_3</b>    | 0.0674  | 0.0171 | 15.5261   | <.0001 |
| <b>soda80_4</b>    | 0.0934  | 0.0164 | 32.3691   | <.0001 |
| <b>cig80_1</b>     | 0.2512  | 0.0457 | 30.2533   | <.0001 |
| <b>cig80_2</b>     | 0.3739  | 0.0585 | 40.8145   | <.0001 |
| <b>cig80_3</b>     | 0.2710  | 0.0499 | 29.4915   | <.0001 |
| <b>cig80_4</b>     | 0.1488  | 0.0442 | 11.3494   | 0.0008 |
| <b>period_2</b>    | 0.7838  | 0.0888 | 77.8349   | <.0001 |
| <b>period_4</b>    | 0.3024  | 0.0357 | 71.7497   | <.0001 |
| <b>period_6</b>    | 0.4463  | 0.0229 | 380.7528  | <.0001 |
| <b>period_8</b>    | 0.4093  | 0.0212 | 373.9550  | <.0001 |
| <b>period_10</b>   | 0.3238  | 0.0200 | 263.1008  | <.0001 |
| <b>mnp_l2</b>      | 0.0773  | 0.0242 | 10.2396   | 0.0014 |
| <b>mnp_l1</b>      | 0.0477  | 0.0318 | 2.2543    | 0.1332 |
| <b>pmh_l2</b>      | 0.0182  | 0.0171 | 1.1227    | 0.2893 |
| <b>pmh_l1</b>      | -0.0133 | 0.0197 | 0.4553    | 0.4998 |
| <b>ost_l2</b>      | 0.0132  | 0.0345 | 0.1464    | 0.7020 |
| <b>ost_l1</b>      | -0.0554 | 0.0419 | 1.7470    | 0.1862 |

|                        |          |        |         |        |
|------------------------|----------|--------|---------|--------|
| <b>rpmeats_l1_1</b>    | 0.0813   | 0.0528 | 2.3723  | 0.1235 |
| <b>rpmeats_l1_1_ti</b> | 0.0368   | 0.0275 | 1.7972  | 0.1800 |
| <b>rpmeats_l1_2</b>    | 0.0480   | 0.0416 | 1.3319  | 0.2485 |
| <b>rpmeats_l1_2_ti</b> | 0.0512   | 0.0225 | 5.1802  | 0.0228 |
| <b>rpmeats_l1_3</b>    | -0.00088 | 0.0390 | 0.0005  | 0.9819 |
| <b>rpmeats_l1_3_ti</b> | 0.0596   | 0.0214 | 7.7725  | 0.0053 |
| <b>rpmeats_l1_4</b>    | -0.0791  | 0.0335 | 5.5770  | 0.0182 |
| <b>rpmeats_l1_4_ti</b> | 0.0696   | 0.0190 | 13.4525 | 0.0002 |
| <b>coff_l1_1</b>       | 0.0747   | 0.0433 | 2.9792  | 0.0843 |
| <b>coff_l1_1_ti</b>    | -0.0388  | 0.0210 | 3.4098  | 0.0648 |
| <b>coff_l1_2</b>       | -0.00637 | 0.0527 | 0.0146  | 0.9039 |
| <b>coff_l1_2_ti</b>    | -0.00137 | 0.0275 | 0.0025  | 0.9603 |
| <b>coff_l1_3</b>       | 0.0112   | 0.0613 | 0.0335  | 0.8547 |
| <b>coff_l1_3_ti</b>    | -0.0151  | 0.0329 | 0.2099  | 0.6468 |
| <b>coff_l1_4</b>       | 0.0983   | 0.0294 | 11.1684 | 0.0008 |
| <b>coff_l1_4_ti</b>    | -0.0431  | 0.0157 | 7.5519  | 0.0060 |
| <b>whgrn_l1_1</b>      | -0.0273  | 0.0430 | 0.4047  | 0.5247 |
| <b>whgrn_l1_1_ti</b>   | -0.00839 | 0.0228 | 0.1350  | 0.7133 |
| <b>whgrn_l1_2</b>      | -0.00423 | 0.0428 | 0.0098  | 0.9213 |
| <b>whgrn_l1_2_ti</b>   | 0.0225   | 0.0229 | 0.9656  | 0.3258 |
| <b>whgrn_l1_3</b>      | -0.0359  | 0.0443 | 0.6569  | 0.4176 |
| <b>whgrn_l1_3_ti</b>   | 0.0367   | 0.0236 | 2.4146  | 0.1202 |
| <b>whgrn_l1_4</b>      | 0.0323   | 0.0449 | 0.5165  | 0.4723 |
| <b>whgrn_l1_4_ti</b>   | -0.00906 | 0.0239 | 0.1433  | 0.7050 |
| <b>soda_l1_1</b>       | -0.0380  | 0.0664 | 0.3279  | 0.5669 |
| <b>soda_l1_1_ti</b>    | 0.0103   | 0.0254 | 0.1638  | 0.6857 |
| <b>soda_l1_2</b>       | 0.0447   | 0.0538 | 0.6904  | 0.4060 |
| <b>soda_l1_2_ti</b>    | -0.0177  | 0.0202 | 0.7613  | 0.3829 |
| <b>soda_l1_3</b>       | 0.0168   | 0.0537 | 0.0984  | 0.7537 |
| <b>soda_l1_3_ti</b>    | -0.0161  | 0.0202 | 0.6322  | 0.4265 |
| <b>soda_l1_4</b>       | 0.0209   | 0.0545 | 0.1471  | 0.7014 |
| <b>soda_l1_4_ti</b>    | -0.00261 | 0.0208 | 0.0158  | 0.9000 |

|                    |         |        |           |        |
|--------------------|---------|--------|-----------|--------|
| <b>cal_l1_1</b>    | 0.5970  | 0.0470 | 161.4992  | <.0001 |
| <b>cal_l1_1_ti</b> | -0.1211 | 0.0249 | 23.7054   | <.0001 |
| <b>cal_l1_2</b>    | 0.4394  | 0.0430 | 104.3237  | <.0001 |
| <b>cal_l1_2_ti</b> | -0.1091 | 0.0230 | 22.4776   | <.0001 |
| <b>cal_l1_3</b>    | 0.2805  | 0.0413 | 46.1234   | <.0001 |
| <b>cal_l1_3_ti</b> | -0.0633 | 0.0223 | 8.0551    | 0.0045 |
| <b>cal_l1_4</b>    | 0.1735  | 0.0400 | 18.8061   | <.0001 |
| <b>cal_l1_4_ti</b> | -0.0390 | 0.0218 | 3.2079    | 0.0733 |
| <b>alc_l1_1</b>    | -4.2800 | 0.0600 | 5090.7811 | <.0001 |
| <b>alc_l1_1_ti</b> | 0.1807  | 0.0319 | 32.0364   | <.0001 |
| <b>alc_l1_2</b>    | -1.7937 | 0.0612 | 857.8727  | <.0001 |
| <b>alc_l1_2_ti</b> | 0.1399  | 0.0328 | 18.1545   | <.0001 |
| <b>alc_l1_3</b>    | -0.3697 | 0.0868 | 18.1384   | <.0001 |
| <b>alc_l1_3_ti</b> | 0.0172  | 0.0469 | 0.1344    | 0.7139 |
| <b>cig_l2_1</b>    | 0.2013  | 0.0737 | 7.4660    | 0.0063 |
| <b>cig_l1_1</b>    | 0.2484  | 0.0744 | 11.1417   | 0.0008 |
| <b>cig_l2_2</b>    | 0.1403  | 0.0869 | 2.6043    | 0.1066 |
| <b>cig_l1_2</b>    | 0.2784  | 0.0874 | 10.1562   | 0.0014 |
| <b>cig_l2_3</b>    | 0.00949 | 0.0753 | 0.0159    | 0.8997 |
| <b>cig_l1_3</b>    | 0.2544  | 0.0761 | 11.1749   | 0.0008 |
| <b>cig_l2_4</b>    | 0.0257  | 0.0670 | 0.1469    | 0.7015 |
| <b>cig_l1_4</b>    | 0.1654  | 0.0687 | 5.7922    | 0.0161 |
| <b>mvi_l2</b>      | -0.0168 | 0.0117 | 2.0569    | 0.1515 |
| <b>mvi_l1</b>      | 0.00505 | 0.0120 | 0.1786    | 0.6725 |
| <b>act_l1_1</b>    | -0.3074 | 0.0177 | 300.1143  | <.0001 |
| <b>act_l1_1_ti</b> | 0.0864  | 0.0200 | 18.6847   | <.0001 |
| <b>act_l1_2</b>    | -0.1270 | 0.0203 | 38.9961   | <.0001 |
| <b>act_l1_2_ti</b> | -0.0158 | 0.0244 | 0.4197    | 0.5171 |
| <b>act_l1_3</b>    | -0.0232 | 0.0359 | 0.4180    | 0.5179 |
| <b>act_l1_3_ti</b> | 0.0637  | 0.0818 | 0.6054    | 0.4365 |
| <b>act_l1_4</b>    | -0.0420 | 0.0233 | 3.2517    | 0.0713 |
| <b>act_l1_4_ti</b> | -0.0152 | 0.0227 | 0.4438    | 0.5053 |

|                    |          |        |         |        |
|--------------------|----------|--------|---------|--------|
| <b>act_l1_5</b>    | 0.0848   | 0.0385 | 4.8375  | 0.0278 |
| <b>act_l1_5_ti</b> | -0.0729  | 0.1408 | 0.2684  | 0.6044 |
| <b>can_l2</b>      | -0.0178  | 0.0493 | 0.1298  | 0.7186 |
| <b>can_l1</b>      | -0.0209  | 0.0442 | 0.2236  | 0.6363 |
| <b>bmi_l2_1</b>    | 0.1238   | 0.0897 | 1.9055  | 0.1675 |
| <b>bmi_l1_1</b>    | -0.3347  | 0.0812 | 16.9921 | <.0001 |
| <b>bmi_l2_2</b>    | 0.1177   | 0.0529 | 4.9507  | 0.0261 |
| <b>bmi_l1_2</b>    | -0.1004  | 0.0486 | 4.2734  | 0.0387 |
| <b>bmi_l2_3</b>    | 0.1312   | 0.0485 | 7.3264  | 0.0068 |
| <b>bmi_l1_3</b>    | -0.0333  | 0.0447 | 0.5566  | 0.4556 |
| <b>bmi_l2_4</b>    | 0.0968   | 0.0444 | 4.7495  | 0.0293 |
| <b>bmi_l1_4</b>    | -0.00635 | 0.0410 | 0.0239  | 0.8771 |
| <b>bmi_l2_5</b>    | 0.0835   | 0.0390 | 4.5697  | 0.0325 |
| <b>bmi_l1_5</b>    | -0.0348  | 0.0365 | 0.9080  | 0.3407 |
| <b>chl_l2</b>      | 0.0157   | 0.0239 | 0.4305  | 0.5118 |
| <b>chl_l1</b>      | -0.0263  | 0.0228 | 1.3215  | 0.2503 |
| <b>hbp_l2</b>      | -0.0273  | 0.0276 | 0.9800  | 0.3222 |
| <b>hbp_l1</b>      | -0.0770  | 0.0269 | 8.1694  | 0.0043 |
| <b>sta_l1</b>      | -0.0192  | 0.0200 | 0.9284  | 0.3353 |
| <b>sta_l1_ti</b>   | 0.0465   | 0.0224 | 4.3263  | 0.0375 |
| <b>asn_l2_1</b>    | 0.0284   | 0.0172 | 2.7309  | 0.0984 |
| <b>asn_l1_1</b>    | -0.0443  | 0.0175 | 6.4174  | 0.0113 |
| <b>asn_l2_2</b>    | 0.0624   | 0.0170 | 13.4206 | 0.0002 |
| <b>asn_l1_2</b>    | 0.0506   | 0.0169 | 8.9364  | 0.0028 |
| <b>angcbg_l2</b>   | -0.0321  | 0.0753 | 0.1811  | 0.6705 |
| <b>angcbg_l1</b>   | -0.0914  | 0.0700 | 1.7041  | 0.1917 |
| <b>str_l2</b>      | 0.0315   | 0.1487 | 0.0450  | 0.8321 |
| <b>str_l1</b>      | -0.2738  | 0.1275 | 4.6139  | 0.0317 |
| <b>mi_l2</b>       | 0.2589   | 0.1586 | 2.6638  | 0.1027 |
| <b>mi_l1</b>       | -0.2851  | 0.1414 | 4.0639  | 0.0438 |
| <b>mnp</b>         | 0.0257   | 0.0268 | 0.9176  | 0.3381 |
| <b>pmh</b>         | 0.0426   | 0.0170 | 6.2638  | 0.0123 |

|                  |         |        |          |        |
|------------------|---------|--------|----------|--------|
| <b>ost</b>       | -0.0692 | 0.0297 | 5.4323   | 0.0198 |
| <b>rpmeats_1</b> | -0.1135 | 0.0226 | 25.1745  | <.0001 |
| <b>rpmeats_2</b> | 0.0577  | 0.0201 | 8.2217   | 0.0041 |
| <b>rpmeats_3</b> | 0.0767  | 0.0192 | 15.8663  | <.0001 |
| <b>rpmeats_4</b> | 0.0420  | 0.0182 | 5.3203   | 0.0211 |
| <b>coff_1</b>    | -0.6014 | 0.0276 | 473.1421 | <.0001 |
| <b>coff_2</b>    | -0.2857 | 0.0242 | 139.0668 | <.0001 |
| <b>coff_3</b>    | -0.0815 | 0.0262 | 9.6743   | 0.0019 |
| <b>coff_4</b>    | -0.0963 | 0.0147 | 42.7146  | <.0001 |
| <b>whgrn_1</b>   | 0.1449  | 0.0207 | 48.9705  | <.0001 |
| <b>whgrn_2</b>   | 0.2225  | 0.0185 | 144.9385 | <.0001 |
| <b>whgrn_3</b>   | 0.1634  | 0.0173 | 89.3572  | <.0001 |
| <b>whgrn_4</b>   | 0.1166  | 0.0163 | 51.2177  | <.0001 |
| <b>soda_1</b>    | 0.0192  | 0.0255 | 0.5679   | 0.4511 |
| <b>soda_1_ti</b> | -0.0109 | 0.0403 | 0.0731   | 0.7869 |
| <b>soda_2</b>    | 0.1647  | 0.0212 | 60.2165  | <.0001 |
| <b>soda_2_ti</b> | -0.1464 | 0.0325 | 20.2745  | <.0001 |
| <b>soda_3</b>    | 0.1555  | 0.0202 | 59.0939  | <.0001 |
| <b>soda_3_ti</b> | -0.1341 | 0.0326 | 16.9261  | <.0001 |
| <b>soda_4</b>    | 0.1142  | 0.0193 | 35.0243  | <.0001 |
| <b>soda_4_ti</b> | -0.0762 | 0.0335 | 5.1762   | 0.0229 |
| <b>cal_1</b>     | -0.6714 | 0.0229 | 860.8539 | <.0001 |
| <b>cal_2</b>     | -0.4143 | 0.0203 | 417.0299 | <.0001 |
| <b>cal_3</b>     | -0.2826 | 0.0188 | 225.8476 | <.0001 |
| <b>cal_4</b>     | -0.1372 | 0.0175 | 61.1775  | <.0001 |

(P) Log-linear model to estimate the amount of alcohol intake among drinkers

| <b>Variable</b>  | <b>Parameter estimate</b> | <b>Standard error</b> | <b>t value</b> | <b>P value</b> |
|------------------|---------------------------|-----------------------|----------------|----------------|
| <b>Intercept</b> | 2.80745                   | 0.08854               | 31.71          | <.0001         |
| <b>fhx</b>       | -0.02623                  | 0.00414               | -6.34          | <.0001         |
| <b>smkhx</b>     | 0.07925                   | 0.00373               | 21.27          | <.0001         |

|                      |             |            |         |        |
|----------------------|-------------|------------|---------|--------|
| <b>ochx</b>          | 0.01699     | 0.00346    | 4.91    | <.0001 |
| <b>employed_1</b>    | 0.01389     | 0.00635    | 2.19    | 0.0287 |
| <b>employed_2</b>    | 0.01635     | 0.01004    | 1.63    | 0.1035 |
| <b>employed_3</b>    | -0.01523    | 0.00531    | -2.87   | 0.0041 |
| <b>employed_4</b>    | -0.00936    | 0.00662    | -1.41   | 0.1572 |
| <b>employed_5</b>    | -0.01211    | 0.00482    | -2.51   | 0.0120 |
| <b>employed_6</b>    | 0.00437     | 0.00697    | 0.63    | 0.5314 |
| <b>employed_miss</b> | -0.00254    | 0.02280    | -0.11   | 0.9114 |
| <b>mar80</b>         | 0.03540     | 0.00605    | 5.85    | <.0001 |
| <b>college</b>       | 0.01567     | 0.00358    | 4.38    | <.0001 |
| <b>stress82</b>      | -0.01551    | 0.00382    | -4.05   | <.0001 |
| <b>stress82_miss</b> | -0.02111    | 0.02117    | -1.00   | 0.3186 |
| <b>hhhighsch</b>     | -0.01610    | 0.00455    | -3.54   | 0.0004 |
| <b>hcollege</b>      | 0.02021     | 0.00474    | 4.27    | <.0001 |
| <b>hgradsch</b>      | 0.04564     | 0.00496    | 9.20    | <.0001 |
| <b>lbmi18_2</b>      | 0.01889     | 0.00409    | 4.62    | <.0001 |
| <b>lbmi18_3</b>      | 0.00868     | 0.00681    | 1.27    | 0.2024 |
| <b>lbmi18_4</b>      | 0.01065     | 0.01750    | 0.61    | 0.5428 |
| <b>baseage</b>       | 0.00599     | 0.00345    | 1.74    | 0.0823 |
| <b>baseage_sq</b>    | -0.00010305 | 0.00003418 | -3.01   | 0.0026 |
| <b>bmi80_1</b>       | 0.02468     | 0.02511    | 0.98    | 0.3257 |
| <b>bmi80_2</b>       | 0.01343     | 0.01805    | 0.74    | 0.4568 |
| <b>bmi80_3</b>       | 0.00040490  | 0.01737    | 0.02    | 0.9814 |
| <b>bmi80_4</b>       | -0.02155    | 0.01670    | -1.29   | 0.1970 |
| <b>bmi80_5</b>       | -0.00426    | 0.01637    | -0.26   | 0.7946 |
| <b>act80_1</b>       | -0.00193    | 0.00510    | -0.38   | 0.7048 |
| <b>act80_2</b>       | -0.00647    | 0.00594    | -1.09   | 0.2759 |
| <b>act80_3</b>       | -0.00959    | 0.00520    | -1.85   | 0.0649 |
| <b>alc80_1</b>       | -0.54971    | 0.00547    | -100.52 | <.0001 |
| <b>alc80_2</b>       | -0.42085    | 0.00468    | -89.91  | <.0001 |
| <b>alc80_3</b>       | -0.26028    | 0.00498    | -52.23  | <.0001 |
| <b>rpmeats80_1</b>   | 0.07244     | 0.01005    | 7.21    | <.0001 |



|                        |            |         |        |        |
|------------------------|------------|---------|--------|--------|
| <b>rpmeats80_2</b>     | 0.03282    | 0.00585 | 5.61   | <.0001 |
| <b>rpmeats80_3</b>     | 0.01690    | 0.00488 | 3.47   | 0.0005 |
| <b>rpmeats80_4</b>     | 0.01297    | 0.00446 | 2.91   | 0.0036 |
| <b>coff80_1</b>        | -0.01371   | 0.00501 | -2.74  | 0.0062 |
| <b>coff80_2</b>        | -0.02504   | 0.00691 | -3.62  | 0.0003 |
| <b>coff80_3</b>        | -0.01049   | 0.01066 | -0.98  | 0.3247 |
| <b>whgrn80_1</b>       | -0.00557   | 0.00486 | -1.14  | 0.2522 |
| <b>whgrn80_2</b>       | 0.00009899 | 0.00512 | 0.02   | 0.9846 |
| <b>soda80_1</b>        | 0.02629    | 0.00620 | 4.24   | <.0001 |
| <b>soda80_2</b>        | -0.00432   | 0.00554 | -0.78  | 0.4358 |
| <b>soda80_3</b>        | 0.00071878 | 0.00542 | 0.13   | 0.8944 |
| <b>soda80_4</b>        | -0.00189   | 0.00516 | -0.37  | 0.7137 |
| <b>cig80_1</b>         | -0.09790   | 0.01394 | -7.02  | <.0001 |
| <b>cig80_2</b>         | -0.08491   | 0.01675 | -5.07  | <.0001 |
| <b>cig80_3</b>         | -0.07977   | 0.01504 | -5.30  | <.0001 |
| <b>cig80_4</b>         | -0.06132   | 0.01343 | -4.57  | <.0001 |
| <b>period_2</b>        | -0.13557   | 0.01984 | -6.83  | <.0001 |
| <b>period_4</b>        | -0.24114   | 0.01122 | -21.48 | <.0001 |
| <b>period_6</b>        | -0.17999   | 0.00725 | -24.81 | <.0001 |
| <b>period_8</b>        | -0.15545   | 0.00673 | -23.08 | <.0001 |
| <b>period_10</b>       | 0.05149    | 0.00637 | 8.09   | <.0001 |
| <b>mnp_l2</b>          | 0.01223    | 0.00724 | 1.69   | 0.0911 |
| <b>mnp_l1</b>          | 0.01175    | 0.00944 | 1.24   | 0.2133 |
| <b>pmh_l2</b>          | 0.00611    | 0.00523 | 1.17   | 0.2423 |
| <b>pmh_l1</b>          | -0.03169   | 0.00593 | -5.34  | <.0001 |
| <b>ost_l2</b>          | -0.00597   | 0.01129 | -0.53  | 0.5968 |
| <b>ost_l1</b>          | -0.01312   | 0.01359 | -0.97  | 0.3343 |
| <b>rpmeats_l1_1</b>    | -0.02724   | 0.01582 | -1.72  | 0.0851 |
| <b>rpmeats_l1_1_ti</b> | 0.02707    | 0.00831 | 3.26   | 0.0011 |
| <b>rpmeats_l1_2</b>    | -0.01824   | 0.01168 | -1.56  | 0.1184 |
| <b>rpmeats_l1_2_ti</b> | 0.01452    | 0.00642 | 2.26   | 0.0237 |
| <b>rpmeats_l1_3</b>    | -0.01855   | 0.01090 | -1.70  | 0.0888 |

|                        |             |         |       |        |
|------------------------|-------------|---------|-------|--------|
| <b>rpmeats_l1_3_ti</b> | 0.00859     | 0.00610 | 1.41  | 0.1595 |
| <b>rpmeats_l1_4</b>    | -0.00196    | 0.00935 | -0.21 | 0.8338 |
| <b>rpmeats_l1_4_ti</b> | -0.00012523 | 0.00544 | -0.02 | 0.9816 |
| <b>coff_l1_1</b>       | 0.03857     | 0.01433 | 2.69  | 0.0071 |
| <b>coff_l1_1_ti</b>    | -0.00746    | 0.00718 | -1.04 | 0.2988 |
| <b>coff_l1_2</b>       | 0.05492     | 0.01650 | 3.33  | 0.0009 |
| <b>coff_l1_2_ti</b>    | -0.02418    | 0.00875 | -2.76 | 0.0057 |
| <b>coff_l1_3</b>       | 0.03402     | 0.01811 | 1.88  | 0.0603 |
| <b>coff_l1_3_ti</b>    | -0.01811    | 0.00989 | -1.83 | 0.0670 |
| <b>coff_l1_4</b>       | 0.01194     | 0.00787 | 1.52  | 0.1292 |
| <b>coff_l1_4_ti</b>    | -0.00555    | 0.00427 | -1.30 | 0.1943 |
| <b>whgrn_l1_1</b>      | -0.00468    | 0.01258 | -0.37 | 0.7101 |
| <b>whgrn_l1_1_ti</b>   | 0.00726     | 0.00678 | 1.07  | 0.2839 |
| <b>whgrn_l1_2</b>      | -0.00086036 | 0.01232 | -0.07 | 0.9443 |
| <b>whgrn_l1_2_ti</b>   | 0.00338     | 0.00668 | 0.51  | 0.6125 |
| <b>whgrn_l1_3</b>      | -0.02580    | 0.01276 | -2.02 | 0.0433 |
| <b>whgrn_l1_3_ti</b>   | 0.01360     | 0.00690 | 1.97  | 0.0488 |
| <b>whgrn_l1_4</b>      | -0.02271    | 0.01309 | -1.74 | 0.0826 |
| <b>whgrn_l1_4_ti</b>   | 0.00986     | 0.00708 | 1.39  | 0.1634 |
| <b>soda_l1_1</b>       | 0.09851     | 0.02045 | 4.82  | <.0001 |
| <b>soda_l1_1_ti</b>    | -0.03449    | 0.00762 | -4.53 | <.0001 |
| <b>soda_l1_2</b>       | 0.04275     | 0.01698 | 2.52  | 0.0118 |
| <b>soda_l1_2_ti</b>    | -0.02005    | 0.00628 | -3.20 | 0.0014 |
| <b>soda_l1_3</b>       | 0.04253     | 0.01690 | 2.52  | 0.0119 |
| <b>soda_l1_3_ti</b>    | -0.02161    | 0.00625 | -3.46 | 0.0005 |
| <b>soda_l1_4</b>       | 0.02922     | 0.01701 | 1.72  | 0.0858 |
| <b>soda_l1_4_ti</b>    | -0.01345    | 0.00636 | -2.12 | 0.0344 |
| <b>cal_l1_1</b>        | 0.25666     | 0.01361 | 18.85 | <.0001 |
| <b>cal_l1_1_ti</b>     | -0.01730    | 0.00730 | -2.37 | 0.0178 |
| <b>cal_l1_2</b>        | 0.16744     | 0.01219 | 13.74 | <.0001 |
| <b>cal_l1_2_ti</b>     | -0.00107    | 0.00661 | -0.16 | 0.8715 |
| <b>cal_l1_3</b>        | 0.11366     | 0.01150 | 9.89  | <.0001 |

|                    |          |         |         |        |
|--------------------|----------|---------|---------|--------|
| <b>cal_l1_3_ti</b> | 0.00137  | 0.00629 | 0.22    | 0.8279 |
| <b>cal_l1_4</b>    | 0.07308  | 0.01093 | 6.68    | <.0001 |
| <b>cal_l1_4_ti</b> | -0.00219 | 0.00606 | -0.36   | 0.7179 |
| <b>alc_l1_1</b>    | -1.93197 | 0.01192 | -162.02 | <.0001 |
| <b>alc_l1_1_ti</b> | 0.08900  | 0.00627 | 14.19   | <.0001 |
| <b>alc_l1_2</b>    | -1.46082 | 0.00871 | -167.63 | <.0001 |
| <b>alc_l1_2_ti</b> | 0.06261  | 0.00465 | 13.46   | <.0001 |
| <b>alc_l1_3</b>    | -0.74884 | 0.01014 | -73.87  | <.0001 |
| <b>alc_l1_3_ti</b> | 0.03688  | 0.00564 | 6.54    | <.0001 |
| <b>cig_l2_1</b>    | 0.00415  | 0.02155 | 0.19    | 0.8471 |
| <b>cig_l1_1</b>    | -0.07006 | 0.02113 | -3.32   | 0.0009 |
| <b>cig_l2_2</b>    | -0.03109 | 0.02465 | -1.26   | 0.2072 |
| <b>cig_l1_2</b>    | -0.05598 | 0.02416 | -2.32   | 0.0205 |
| <b>cig_l2_3</b>    | -0.02015 | 0.02202 | -0.92   | 0.3601 |
| <b>cig_l1_3</b>    | -0.11114 | 0.02156 | -5.15   | <.0001 |
| <b>cig_l2_4</b>    | -0.02590 | 0.01958 | -1.32   | 0.1860 |
| <b>cig_l1_4</b>    | -0.05411 | 0.01943 | -2.79   | 0.0054 |
| <b>mvi_l2</b>      | 0.00469  | 0.00357 | 1.31    | 0.1887 |
| <b>mvi_l1</b>      | -0.00635 | 0.00365 | -1.74   | 0.0821 |
| <b>act_l1_1</b>    | -0.04709 | 0.00528 | -8.91   | <.0001 |
| <b>act_l1_1_ti</b> | 0.02225  | 0.00571 | 3.90    | <.0001 |
| <b>act_l1_2</b>    | -0.03212 | 0.00602 | -5.33   | <.0001 |
| <b>act_l1_2_ti</b> | 0.01424  | 0.00694 | 2.05    | 0.0401 |
| <b>act_l1_3</b>    | -0.01361 | 0.01037 | -1.31   | 0.1892 |
| <b>act_l1_3_ti</b> | -0.02062 | 0.02309 | -0.89   | 0.3719 |
| <b>act_l1_4</b>    | -0.00568 | 0.00674 | -0.84   | 0.3994 |
| <b>act_l1_4_ti</b> | 0.00512  | 0.00640 | 0.80    | 0.4237 |
| <b>act_l1_5</b>    | -0.00754 | 0.01063 | -0.71   | 0.4785 |
| <b>act_l1_5_ti</b> | 0.00839  | 0.04034 | 0.21    | 0.8353 |
| <b>can_l2</b>      | 0.02287  | 0.01542 | 1.48    | 0.1380 |
| <b>can_l1</b>      | -0.03811 | 0.01371 | -2.78   | 0.0055 |
| <b>bmi_l2_1</b>    | 0.09635  | 0.02992 | 3.22    | 0.0013 |

|                  |          |         |       |        |
|------------------|----------|---------|-------|--------|
| <b>bmi_11_1</b>  | 0.03698  | 0.02710 | 1.36  | 0.1725 |
| <b>bmi_12_2</b>  | 0.08476  | 0.01870 | 4.53  | <.0001 |
| <b>bmi_11_2</b>  | 0.08543  | 0.01701 | 5.02  | <.0001 |
| <b>bmi_12_3</b>  | 0.08171  | 0.01758 | 4.65  | <.0001 |
| <b>bmi_11_3</b>  | 0.07457  | 0.01607 | 4.64  | <.0001 |
| <b>bmi_12_4</b>  | 0.06223  | 0.01650 | 3.77  | 0.0002 |
| <b>bmi_11_4</b>  | 0.05848  | 0.01514 | 3.86  | 0.0001 |
| <b>bmi_12_5</b>  | 0.02480  | 0.01482 | 1.67  | 0.0942 |
| <b>bmi_11_5</b>  | 0.03185  | 0.01370 | 2.32  | 0.0201 |
| <b>chl_12</b>    | -0.00259 | 0.00747 | -0.35 | 0.7294 |
| <b>chl_11</b>    | 0.00613  | 0.00710 | 0.86  | 0.3878 |
| <b>hbp_12</b>    | -0.00919 | 0.00854 | -1.08 | 0.2821 |
| <b>hbp_11</b>    | 0.01746  | 0.00828 | 2.11  | 0.0350 |
| <b>sta_11</b>    | -0.01695 | 0.00654 | -2.59 | 0.0096 |
| <b>sta_11_ti</b> | 0.00343  | 0.00711 | 0.48  | 0.6296 |
| <b>asn_12_1</b>  | -0.00618 | 0.00532 | -1.16 | 0.2459 |
| <b>asn_11_1</b>  | -0.03488 | 0.00547 | -6.38 | <.0001 |
| <b>asn_12_2</b>  | -0.00943 | 0.00520 | -1.81 | 0.0696 |
| <b>asn_11_2</b>  | -0.02554 | 0.00519 | -4.93 | <.0001 |
| <b>angcbg_12</b> | 0.00693  | 0.02549 | 0.27  | 0.7858 |
| <b>angcbg_11</b> | -0.04430 | 0.02353 | -1.88 | 0.0597 |
| <b>str_12</b>    | 0.09787  | 0.05205 | 1.88  | 0.0601 |
| <b>str_11</b>    | -0.12360 | 0.04441 | -2.78 | 0.0054 |
| <b>mi_12</b>     | 0.04847  | 0.05514 | 0.88  | 0.3794 |
| <b>mi_11</b>     | -0.03764 | 0.04887 | -0.77 | 0.4412 |
| <b>mnp</b>       | 0.00323  | 0.00795 | 0.41  | 0.6850 |
| <b>pmh</b>       | -0.00146 | 0.00513 | -0.28 | 0.7762 |
| <b>ost</b>       | -0.02324 | 0.00952 | -2.44 | 0.0146 |
| <b>rpmeats_1</b> | -0.00396 | 0.00711 | -0.56 | 0.5772 |
| <b>rpmeats_2</b> | 0.01742  | 0.00613 | 2.84  | 0.0045 |
| <b>rpmeats_3</b> | 0.02221  | 0.00581 | 3.83  | 0.0001 |
| <b>rpmeats_4</b> | 0.01147  | 0.00547 | 2.10  | 0.0359 |

|                  |          |         |        |        |
|------------------|----------|---------|--------|--------|
| <b>coff_1</b>    | -0.09137 | 0.00950 | -9.62  | <.0001 |
| <b>coff_2</b>    | -0.06874 | 0.00794 | -8.66  | <.0001 |
| <b>coff_3</b>    | -0.06304 | 0.00820 | -7.69  | <.0001 |
| <b>coff_4</b>    | 0.00382  | 0.00423 | 0.90   | 0.3658 |
| <b>whgrn_1</b>   | 0.13624  | 0.00651 | 20.93  | <.0001 |
| <b>whgrn_2</b>   | 0.10501  | 0.00575 | 18.27  | <.0001 |
| <b>whgrn_3</b>   | 0.07712  | 0.00541 | 14.26  | <.0001 |
| <b>whgrn_4</b>   | 0.03719  | 0.00515 | 7.22   | <.0001 |
| <b>soda_1</b>    | 0.07570  | 0.00810 | 9.35   | <.0001 |
| <b>soda_1_ti</b> | -0.06595 | 0.01195 | -5.52  | <.0001 |
| <b>soda_2</b>    | 0.00956  | 0.00679 | 1.41   | 0.1592 |
| <b>soda_2_ti</b> | -0.02184 | 0.00995 | -2.19  | 0.0282 |
| <b>soda_3</b>    | 0.01899  | 0.00645 | 2.94   | 0.0033 |
| <b>soda_3_ti</b> | -0.03328 | 0.00996 | -3.34  | 0.0008 |
| <b>soda_4</b>    | 0.01691  | 0.00616 | 2.75   | 0.0060 |
| <b>soda_4_ti</b> | -0.01954 | 0.01016 | -1.92  | 0.0545 |
| <b>cal_1</b>     | -0.44503 | 0.00724 | -61.50 | <.0001 |
| <b>cal_2</b>     | -0.29526 | 0.00625 | -47.21 | <.0001 |
| <b>cal_3</b>     | -0.19904 | 0.00568 | -35.04 | <.0001 |
| <b>cal_4</b>     | -0.10714 | 0.00519 | -20.63 | <.0001 |

---

(Q) Logistic model to estimate the probability of starting smoking among non-smokers

| <b>Variable</b>      | <b>Log odds ratio</b> | <b>Standard error</b> | <b>Wald chi-square</b> | <b>P value</b> |
|----------------------|-----------------------|-----------------------|------------------------|----------------|
| <b>Intercept</b>     | -2.1362               | 0.8964                | 5.6791                 | 0.0172         |
| <b>fhx</b>           | 0.0688                | 0.0413                | 2.7794                 | 0.0955         |
| <b>smkhx</b>         | 2.5343                | 0.0984                | 663.1130               | <.0001         |
| <b>ochx</b>          | 0.0335                | 0.0353                | 0.9012                 | 0.3425         |
| <b>employed_1</b>    | 0.0788                | 0.0648                | 1.4756                 | 0.2245         |
| <b>employed_2</b>    | 0.1090                | 0.0941                | 1.3418                 | 0.2467         |
| <b>employed_3</b>    | 0.0331                | 0.0536                | 0.3809                 | 0.5371         |
| <b>employed_4</b>    | 0.1121                | 0.0679                | 2.7291                 | 0.0985         |
| <b>employed_5</b>    | -0.00776              | 0.0504                | 0.0237                 | 0.8776         |
| <b>employed_6</b>    | -0.0838               | 0.0762                | 1.2079                 | 0.2718         |
| <b>employed_miss</b> | -0.0267               | 0.2338                | 0.0131                 | 0.9089         |
| <b>mar80</b>         | -0.0991               | 0.0541                | 3.3593                 | 0.0668         |
| <b>college</b>       | -0.0445               | 0.0376                | 1.3990                 | 0.2369         |
| <b>stress82</b>      | 0.0268                | 0.0409                | 0.4312                 | 0.5114         |
| <b>stress82_miss</b> | 0.0157                | 0.2204                | 0.0051                 | 0.9430         |
| <b>hhighsch</b>      | -0.0594               | 0.0435                | 1.8692                 | 0.1716         |
| <b>hcollege</b>      | -0.1027               | 0.0475                | 4.6756                 | 0.0306         |
| <b>hgradsch</b>      | -0.0467               | 0.0512                | 0.8331                 | 0.3614         |
| <b>lbmi18_2</b>      | 0.0450                | 0.0401                | 1.2570                 | 0.2622         |
| <b>lbmi18_3</b>      | -0.1184               | 0.0634                | 3.4843                 | 0.0620         |
| <b>lbmi18_4</b>      | 0.0827                | 0.1333                | 0.3848                 | 0.5351         |
| <b>baseage</b>       | -0.0687               | 0.0352                | 3.8076                 | 0.0510         |
| <b>baseage_sq</b>    | 0.000198              | 0.000353              | 0.3132                 | 0.5757         |
| <b>bmi80_1</b>       | -0.7481               | 0.2288                | 10.6924                | 0.0011         |
| <b>bmi80_2</b>       | -0.5356               | 0.1687                | 10.0768                | 0.0015         |
| <b>bmi80_3</b>       | -0.4701               | 0.1624                | 8.3805                 | 0.0038         |
| <b>bmi80_4</b>       | -0.3812               | 0.1560                | 5.9694                 | 0.0146         |
| <b>bmi80_5</b>       | -0.1014               | 0.1508                | 0.4522                 | 0.5013         |
| <b>act80_1</b>       | -0.1463               | 0.0472                | 9.5955                 | 0.0020         |

|                    |         |        |          |        |
|--------------------|---------|--------|----------|--------|
| <b>act80_2</b>     | -0.1044 | 0.0557 | 3.5194   | 0.0607 |
| <b>act80_3</b>     | -0.0804 | 0.0493 | 2.6558   | 0.1032 |
| <b>alc80_1</b>     | 0.0271  | 0.0535 | 0.2573   | 0.6120 |
| <b>alc80_2</b>     | 0.0390  | 0.0495 | 0.6216   | 0.4304 |
| <b>alc80_3</b>     | -0.0181 | 0.0548 | 0.1088   | 0.7415 |
| <b>rpmeats80_1</b> | 0.2754  | 0.1016 | 7.3474   | 0.0067 |
| <b>rpmeats80_2</b> | -0.0139 | 0.0614 | 0.0514   | 0.8206 |
| <b>rpmeats80_3</b> | 0.0838  | 0.0480 | 3.0400   | 0.0812 |
| <b>rpmeats80_4</b> | 0.0189  | 0.0446 | 0.1794   | 0.6719 |
| <b>coff80_1</b>    | -0.0322 | 0.0517 | 0.3867   | 0.5341 |
| <b>coff80_2</b>    | 0.0548  | 0.0732 | 0.5606   | 0.4540 |
| <b>coff80_3</b>    | -0.0733 | 0.1117 | 0.4309   | 0.5115 |
| <b>whgrn80_1</b>   | -0.1359 | 0.0503 | 7.2896   | 0.0069 |
| <b>whgrn80_2</b>   | -0.1001 | 0.0546 | 3.3631   | 0.0667 |
| <b>soda80_1</b>    | 0.0160  | 0.0605 | 0.0701   | 0.7911 |
| <b>soda80_2</b>    | 0.0194  | 0.0535 | 0.1310   | 0.7174 |
| <b>soda80_3</b>    | -0.0237 | 0.0526 | 0.2027   | 0.6526 |
| <b>soda80_4</b>    | -0.0124 | 0.0492 | 0.0635   | 0.8011 |
| <b>cig80_1</b>     | -1.7627 | 0.0849 | 431.3092 | <.0001 |
| <b>cig80_2</b>     | -0.7447 | 0.1014 | 53.9555  | <.0001 |
| <b>cig80_3</b>     | -0.4317 | 0.0866 | 24.8428  | <.0001 |
| <b>cig80_4</b>     | -0.1916 | 0.0771 | 6.1848   | 0.0129 |
| <b>period_2</b>    | 1.3593  | 0.2405 | 31.9457  | <.0001 |
| <b>period_3</b>    | 1.0678  | 0.2025 | 27.8189  | <.0001 |
| <b>period_4</b>    | 0.8795  | 0.1135 | 59.9978  | <.0001 |
| <b>period_5</b>    | 0.9072  | 0.2051 | 19.5690  | <.0001 |
| <b>period_6</b>    | 0.8508  | 0.0993 | 73.4649  | <.0001 |
| <b>period_7</b>    | 0.9101  | 0.1863 | 23.8659  | <.0001 |
| <b>period_8</b>    | 0.2492  | 0.1041 | 5.7308   | 0.0167 |
| <b>period_9</b>    | 0.4852  | 0.1887 | 6.6151   | 0.0101 |
| <b>period_10</b>   | 0.3347  | 0.0985 | 11.5521  | 0.0007 |
| <b>period_11</b>   | 0.3112  | 0.1899 | 2.6846   | 0.1013 |

|                        |          |        |        |        |
|------------------------|----------|--------|--------|--------|
| <b>mnp_l2</b>          | 0.0908   | 0.0764 | 1.4148 | 0.2343 |
| <b>mnp_l1</b>          | -0.2372  | 0.0908 | 6.8287 | 0.0090 |
| <b>pmh_l2</b>          | 0.1050   | 0.0550 | 3.6503 | 0.0561 |
| <b>pmh_l1</b>          | -0.1621  | 0.0600 | 7.3121 | 0.0068 |
| <b>ost_l2</b>          | -0.2034  | 0.1063 | 3.6582 | 0.0558 |
| <b>ost_l1</b>          | 0.3371   | 0.1356 | 6.1758 | 0.0130 |
| <b>rpmeats_l1_1</b>    | 0.1098   | 0.1981 | 0.3072 | 0.5794 |
| <b>rpmeats_l1_1_ti</b> | -0.0922  | 0.1061 | 0.7555 | 0.3847 |
| <b>rpmeats_l1_2</b>    | 0.0703   | 0.1533 | 0.2102 | 0.6466 |
| <b>rpmeats_l1_2_ti</b> | -0.0554  | 0.0853 | 0.4210 | 0.5165 |
| <b>rpmeats_l1_3</b>    | 0.2699   | 0.1378 | 3.8378 | 0.0501 |
| <b>rpmeats_l1_3_ti</b> | -0.1122  | 0.0782 | 2.0621 | 0.1510 |
| <b>rpmeats_l1_4</b>    | 0.2926   | 0.1183 | 6.1195 | 0.0134 |
| <b>rpmeats_l1_4_ti</b> | -0.1512  | 0.0698 | 4.6954 | 0.0302 |
| <b>coff_l1_1</b>       | 0.2360   | 0.1825 | 1.6733 | 0.1958 |
| <b>coff_l1_1_ti</b>    | -0.1592  | 0.0972 | 2.6829 | 0.1014 |
| <b>coff_l1_2</b>       | 0.1198   | 0.2157 | 0.3084 | 0.5787 |
| <b>coff_l1_2_ti</b>    | -0.0279  | 0.1189 | 0.0552 | 0.8142 |
| <b>coff_l1_3</b>       | 0.0366   | 0.2626 | 0.0194 | 0.8893 |
| <b>coff_l1_3_ti</b>    | -0.0112  | 0.1455 | 0.0059 | 0.9387 |
| <b>coff_l1_4</b>       | 0.0917   | 0.0996 | 0.8474 | 0.3573 |
| <b>coff_l1_4_ti</b>    | -0.00816 | 0.0549 | 0.0221 | 0.8818 |
| <b>whgrn_l1_1</b>      | -0.1427  | 0.1585 | 0.8101 | 0.3681 |
| <b>whgrn_l1_1_ti</b>   | 0.0789   | 0.0873 | 0.8178 | 0.3658 |
| <b>whgrn_l1_2</b>      | -0.0807  | 0.1591 | 0.2573 | 0.6120 |
| <b>whgrn_l1_2_ti</b>   | 0.1000   | 0.0880 | 1.2906 | 0.2559 |
| <b>whgrn_l1_3</b>      | -0.0642  | 0.1656 | 0.1502 | 0.6983 |
| <b>whgrn_l1_3_ti</b>   | 0.0617   | 0.0919 | 0.4501 | 0.5023 |
| <b>whgrn_l1_4</b>      | 0.0327   | 0.1710 | 0.0367 | 0.8481 |
| <b>whgrn_l1_4_ti</b>   | -0.0767  | 0.0960 | 0.6381 | 0.4244 |
| <b>soda_l1_1</b>       | 0.2371   | 0.1526 | 2.4136 | 0.1203 |
| <b>soda_l1_1_ti</b>    | -0.1188  | 0.0500 | 5.6385 | 0.0176 |



|                     |         |        |          |        |
|---------------------|---------|--------|----------|--------|
| <b>soda_l1_2</b>    | -0.1387 | 0.1217 | 1.2978   | 0.2546 |
| <b>soda_l1_2_ti</b> | 0.0302  | 0.0392 | 0.5953   | 0.4404 |
| <b>soda_l1_3</b>    | -0.0151 | 0.1171 | 0.0166   | 0.8975 |
| <b>soda_l1_3_ti</b> | 0.0218  | 0.0390 | 0.3141   | 0.5752 |
| <b>soda_l1_4</b>    | 0.00119 | 0.1122 | 0.0001   | 0.9915 |
| <b>soda_l1_4_ti</b> | -0.0197 | 0.0394 | 0.2491   | 0.6177 |
| <b>cal_l1_1</b>     | -0.1362 | 0.1699 | 0.6430   | 0.4226 |
| <b>cal_l1_1_ti</b>  | 0.1135  | 0.0925 | 1.5054   | 0.2198 |
| <b>cal_l1_2</b>     | -0.0414 | 0.1528 | 0.0733   | 0.7866 |
| <b>cal_l1_2_ti</b>  | 0.0811  | 0.0847 | 0.9184   | 0.3379 |
| <b>cal_l1_3</b>     | -0.1993 | 0.1502 | 1.7615   | 0.1844 |
| <b>cal_l1_3_ti</b>  | 0.1543  | 0.0840 | 3.3797   | 0.0660 |
| <b>cal_l1_4</b>     | -0.1361 | 0.1452 | 0.8784   | 0.3486 |
| <b>cal_l1_4_ti</b>  | 0.0996  | 0.0824 | 1.4619   | 0.2266 |
| <b>alc_l1_1</b>     | -0.0564 | 0.1396 | 0.1631   | 0.6863 |
| <b>alc_l1_1_ti</b>  | 0.0849  | 0.0665 | 1.6325   | 0.2014 |
| <b>alc_l1_2</b>     | -0.1092 | 0.1296 | 0.7107   | 0.3992 |
| <b>alc_l1_2_ti</b>  | 0.1287  | 0.0664 | 3.7584   | 0.0525 |
| <b>alc_l1_3</b>     | -0.0774 | 0.1457 | 0.2818   | 0.5955 |
| <b>alc_l1_3_ti</b>  | 0.0688  | 0.0815 | 0.7129   | 0.3985 |
| <b>cig_l2_1</b>     | -1.8134 | 0.1246 | 211.9345 | <.0001 |
| <b>cig_l2_2</b>     | 0.3054  | 0.1365 | 5.0057   | 0.0253 |
| <b>cig_l2_3</b>     | 0.4628  | 0.1281 | 13.0539  | 0.0003 |
| <b>cig_l2_4</b>     | 0.3076  | 0.1224 | 6.3143   | 0.0120 |
| <b>mvi_l2</b>       | -0.0221 | 0.0351 | 0.3983   | 0.5280 |
| <b>mvi_l1</b>       | 0.00397 | 0.0351 | 0.0128   | 0.9100 |
| <b>act_l1_1</b>     | 0.1738  | 0.0561 | 9.5942   | 0.0020 |
| <b>act_l1_1_ti</b>  | -0.1344 | 0.0544 | 6.1031   | 0.0135 |
| <b>act_l1_2</b>     | 0.0904  | 0.0645 | 1.9609   | 0.1614 |
| <b>act_l1_2_ti</b>  | -0.0242 | 0.0639 | 0.1434   | 0.7049 |
| <b>act_l1_3</b>     | 0.00787 | 0.1127 | 0.0049   | 0.9443 |
| <b>act_l1_3_ti</b>  | 0.0206  | 0.1404 | 0.0214   | 0.8836 |

|                    |         |        |         |        |
|--------------------|---------|--------|---------|--------|
| <b>act_l1_4</b>    | 0.0806  | 0.0729 | 1.2250  | 0.2684 |
| <b>act_l1_4_ti</b> | -0.0271 | 0.0650 | 0.1736  | 0.6769 |
| <b>act_l1_5</b>    | 0.1113  | 0.1162 | 0.9174  | 0.3382 |
| <b>act_l1_5_ti</b> | -0.0601 | 0.1468 | 0.1676  | 0.6823 |
| <b>can_l2</b>      | 0.1843  | 0.1380 | 1.7837  | 0.1817 |
| <b>can_l1</b>      | -0.1778 | 0.1138 | 2.4406  | 0.1182 |
| <b>bmi_l2_1</b>    | -0.5373 | 0.2566 | 4.3836  | 0.0363 |
| <b>bmi_l1_1</b>    | 1.4934  | 0.2412 | 38.3422 | <.0001 |
| <b>bmi_l2_2</b>    | -0.3201 | 0.1733 | 3.4095  | 0.0648 |
| <b>bmi_l1_2</b>    | 1.1467  | 0.1540 | 55.4768 | <.0001 |
| <b>bmi_l2_3</b>    | -0.0979 | 0.1628 | 0.3613  | 0.5478 |
| <b>bmi_l1_3</b>    | 0.8512  | 0.1452 | 34.3669 | <.0001 |
| <b>bmi_l2_4</b>    | -0.0299 | 0.1527 | 0.0382  | 0.8450 |
| <b>bmi_l1_4</b>    | 0.5392  | 0.1364 | 15.6275 | <.0001 |
| <b>bmi_l2_5</b>    | 0.00999 | 0.1362 | 0.0054  | 0.9415 |
| <b>bmi_l1_5</b>    | 0.2724  | 0.1236 | 4.8570  | 0.0275 |
| <b>chl_l2</b>      | 0.0230  | 0.0701 | 0.1080  | 0.7425 |
| <b>chl_l1</b>      | 0.0321  | 0.0658 | 0.2379  | 0.6258 |
| <b>hbp_l2</b>      | 0.0662  | 0.0836 | 0.6276  | 0.4282 |
| <b>hbp_l1</b>      | -0.0910 | 0.0802 | 1.2878  | 0.2565 |
| <b>sta_l1</b>      | 0.00617 | 0.0709 | 0.0076  | 0.9307 |
| <b>sta_l1_ti</b>   | 0.0385  | 0.0734 | 0.2748  | 0.6002 |
| <b>asn_l2_1</b>    | -0.1198 | 0.0583 | 4.2219  | 0.0399 |
| <b>asn_l1_1</b>    | 0.0117  | 0.0570 | 0.0420  | 0.8375 |
| <b>asn_l2_2</b>    | -0.1084 | 0.0556 | 3.8083  | 0.0510 |
| <b>asn_l1_2</b>    | 0.0538  | 0.0548 | 0.9619  | 0.3267 |
| <b>angcbg_l2</b>   | 0.4238  | 0.1813 | 5.4647  | 0.0194 |
| <b>angcbg_l1</b>   | -0.2175 | 0.1589 | 1.8737  | 0.1711 |
| <b>str_l2</b>      | 0.3708  | 0.3084 | 1.4454  | 0.2293 |
| <b>str_l1</b>      | 0.1291  | 0.2436 | 0.2808  | 0.5962 |
| <b>mi_l2</b>       | 0.8389  | 0.3208 | 6.8402  | 0.0089 |
| <b>mi_l1</b>       | -0.6026 | 0.2647 | 5.1814  | 0.0228 |

|                     |         |        |         |        |
|---------------------|---------|--------|---------|--------|
| <b>mnp</b>          | 0.3470  | 0.0713 | 23.6818 | <.0001 |
| <b>pmh</b>          | -0.0115 | 0.0503 | 0.0518  | 0.8199 |
| <b>ost</b>          | -0.0985 | 0.1040 | 0.8966  | 0.3437 |
| <b>rpmeats_1</b>    | -0.1980 | 0.0953 | 4.3208  | 0.0377 |
| <b>rpmeats_1_ti</b> | -0.1201 | 0.1072 | 1.2549  | 0.2626 |
| <b>rpmeats_2</b>    | -0.1015 | 0.0810 | 1.5685  | 0.2104 |
| <b>rpmeats_2_ti</b> | -0.0452 | 0.0871 | 0.2690  | 0.6040 |
| <b>rpmeats_3</b>    | -0.0966 | 0.0770 | 1.5722  | 0.2099 |
| <b>rpmeats_3_ti</b> | -0.1459 | 0.0810 | 3.2461  | 0.0716 |
| <b>rpmeats_4</b>    | 0.0141  | 0.0708 | 0.0396  | 0.8423 |
| <b>rpmeats_4_ti</b> | -0.1556 | 0.0733 | 4.5047  | 0.0338 |
| <b>coff_1</b>       | -0.4101 | 0.1328 | 9.5411  | 0.0020 |
| <b>coff_1_ti</b>    | -0.0556 | 0.0967 | 0.3305  | 0.5654 |
| <b>coff_2</b>       | -0.1859 | 0.1124 | 2.7320  | 0.0984 |
| <b>coff_2_ti</b>    | -0.1024 | 0.1215 | 0.7099  | 0.3995 |
| <b>coff_3</b>       | -0.1882 | 0.1215 | 2.3996  | 0.1214 |
| <b>coff_3_ti</b>    | 0.00851 | 0.1495 | 0.0032  | 0.9546 |
| <b>coff_4</b>       | -0.0477 | 0.0552 | 0.7464  | 0.3876 |
| <b>coff_4_ti</b>    | -0.0285 | 0.0558 | 0.2610  | 0.6094 |
| <b>whgrn_1</b>      | 0.4545  | 0.0865 | 27.6133 | <.0001 |
| <b>whgrn_1_ti</b>   | 0.0581  | 0.0888 | 0.4274  | 0.5133 |
| <b>whgrn_2</b>      | 0.3738  | 0.0809 | 21.3535 | <.0001 |
| <b>whgrn_2_ti</b>   | 0.00478 | 0.0907 | 0.0028  | 0.9579 |
| <b>whgrn_3</b>      | 0.2613  | 0.0791 | 10.8990 | 0.0010 |
| <b>whgrn_3_ti</b>   | 0.0213  | 0.0947 | 0.0506  | 0.8220 |
| <b>whgrn_4</b>      | 0.2361  | 0.0782 | 9.1194  | 0.0025 |
| <b>whgrn_4_ti</b>   | -0.0390 | 0.0984 | 0.1572  | 0.6918 |
| <b>soda_1</b>       | -0.2705 | 0.1105 | 5.9957  | 0.0143 |
| <b>soda_1_ti</b>    | -0.0181 | 0.0505 | 0.1284  | 0.7200 |
| <b>soda_2</b>       | -0.0675 | 0.0877 | 0.5931  | 0.4412 |
| <b>soda_2_ti</b>    | 0.0229  | 0.0395 | 0.3362  | 0.5620 |
| <b>soda_3</b>       | -0.1039 | 0.0837 | 1.5388  | 0.2148 |

|                  |         |        |        |        |
|------------------|---------|--------|--------|--------|
| <b>soda_3_ti</b> | 0.00899 | 0.0395 | 0.0519 | 0.8199 |
| <b>soda_4</b>    | -0.0618 | 0.0772 | 0.6421 | 0.4230 |
| <b>soda_4_ti</b> | -0.0138 | 0.0401 | 0.1188 | 0.7304 |
| <b>cal_1</b>     | 0.0961  | 0.0951 | 1.0220 | 0.3120 |
| <b>cal_1_ti</b>  | 0.1224  | 0.0930 | 1.7329 | 0.1880 |
| <b>cal_2</b>     | -0.0616 | 0.0850 | 0.5242 | 0.4691 |
| <b>cal_2_ti</b>  | 0.0609  | 0.0865 | 0.4959 | 0.4813 |
| <b>cal_3</b>     | -0.0939 | 0.0790 | 1.4113 | 0.2348 |
| <b>cal_3_ti</b>  | 0.2255  | 0.0855 | 6.9543 | 0.0084 |
| <b>cal_4</b>     | -0.1058 | 0.0745 | 2.0157 | 0.1557 |
| <b>cal_4_ti</b>  | 0.1470  | 0.0850 | 2.9856 | 0.0840 |
| <b>alc_1</b>     | -0.2107 | 0.0906 | 5.4073 | 0.0201 |
| <b>alc_1_ti</b>  | 0.00433 | 0.0659 | 0.0043 | 0.9476 |
| <b>alc_2</b>     | -0.1843 | 0.0818 | 5.0739 | 0.0243 |
| <b>alc_2_ti</b>  | 0.0598  | 0.0666 | 0.8054 | 0.3695 |
| <b>alc_3</b>     | -0.0270 | 0.0816 | 0.1093 | 0.7409 |
| <b>alc_3_ti</b>  | -0.0115 | 0.0829 | 0.0192 | 0.8898 |

---

(R) Logistic model to estimate the probability of continuing smoking among smokers

| <b>Parameter</b>     | <b>Log odds ratio</b> | <b>Standard error</b> | <b>Wald chi-square</b> | <b>P value</b> |
|----------------------|-----------------------|-----------------------|------------------------|----------------|
| <b>Intercept</b>     | 3.5455                | 0.5651                | 39.3597                | <.0001         |
| <b>fhx</b>           | 0.00245               | 0.0251                | 0.0096                 | 0.9221         |
| <b>smkhx</b>         | 0.1822                | 0.1122                | 2.6361                 | 0.1045         |
| <b>ochx</b>          | -0.0770               | 0.0211                | 13.3372                | 0.0003         |
| <b>employed_1</b>    | 0.00616               | 0.0393                | 0.0246                 | 0.8754         |
| <b>employed_2</b>    | -0.0697               | 0.0585                | 1.4157                 | 0.2341         |
| <b>employed_3</b>    | 0.0142                | 0.0320                | 0.1965                 | 0.6576         |
| <b>employed_4</b>    | -0.0833               | 0.0426                | 3.8251                 | 0.0505         |
| <b>employed_5</b>    | -0.0133               | 0.0299                | 0.1983                 | 0.6561         |
| <b>employed_6</b>    | 0.0247                | 0.0451                | 0.3006                 | 0.5835         |
| <b>employed_miss</b> | 0.0345                | 0.1384                | 0.0620                 | 0.8034         |
| <b>mar80</b>         | 0.00419               | 0.0320                | 0.0171                 | 0.8961         |
| <b>college</b>       | -0.0704               | 0.0231                | 9.2983                 | 0.0023         |
| <b>stress82</b>      | 0.0280                | 0.0247                | 1.2874                 | 0.2565         |
| <b>stress82_miss</b> | 0.0390                | 0.1303                | 0.0894                 | 0.7650         |
| <b>hhighsch</b>      | -0.1027               | 0.0260                | 15.6555                | <.0001         |
| <b>hcollege</b>      | -0.1249               | 0.0286                | 19.0082                | <.0001         |
| <b>hgradsch</b>      | -0.1549               | 0.0317                | 23.8902                | <.0001         |
| <b>lbmi18_2</b>      | 0.000484              | 0.0243                | 0.0004                 | 0.9841         |
| <b>lbmi18_3</b>      | -0.00983              | 0.0356                | 0.0763                 | 0.7823         |
| <b>lbmi18_4</b>      | -0.00024              | 0.0756                | 0.0000                 | 0.9975         |
| <b>baseage</b>       | -0.0350               | 0.0216                | 2.6195                 | 0.1056         |
| <b>baseage_sq</b>    | 0.000182              | 0.000213              | 0.7301                 | 0.3928         |
| <b>bmi80_1</b>       | 0.1742                | 0.1383                | 1.5872                 | 0.2077         |
| <b>bmi80_2</b>       | -0.0172               | 0.1093                | 0.0247                 | 0.8752         |
| <b>bmi80_3</b>       | -0.0359               | 0.1057                | 0.1154                 | 0.7341         |
| <b>bmi80_4</b>       | 0.00981               | 0.1019                | 0.0093                 | 0.9233         |
| <b>bmi80_5</b>       | -0.0888               | 0.0979                | 0.8218                 | 0.3647         |
| <b>act80_1</b>       | -0.0983               | 0.0289                | 11.5349                | 0.0007         |

|                    |          |        |         |        |
|--------------------|----------|--------|---------|--------|
| <b>act80_2</b>     | -0.0658  | 0.0345 | 3.6403  | 0.0564 |
| <b>act80_3</b>     | -0.0351  | 0.0307 | 1.3058  | 0.2532 |
| <b>alc80_1</b>     | 0.0242   | 0.0328 | 0.5432  | 0.4611 |
| <b>alc80_2</b>     | -0.0205  | 0.0308 | 0.4457  | 0.5044 |
| <b>alc80_3</b>     | -0.1063  | 0.0339 | 9.8155  | 0.0017 |
| <b>rpmeats80_1</b> | -0.0781  | 0.0671 | 1.3520  | 0.2449 |
| <b>rpmeats80_2</b> | 0.0638   | 0.0372 | 2.9432  | 0.0862 |
| <b>rpmeats80_3</b> | -0.0500  | 0.0295 | 2.8727  | 0.0901 |
| <b>rpmeats80_4</b> | 0.00335  | 0.0268 | 0.0156  | 0.9007 |
| <b>coff80_1</b>    | 0.0216   | 0.0322 | 0.4507  | 0.5020 |
| <b>coff80_2</b>    | -0.0132  | 0.0477 | 0.0765  | 0.7821 |
| <b>coff80_3</b>    | -0.0507  | 0.0665 | 0.5813  | 0.4458 |
| <b>whgrn80_1</b>   | -0.0193  | 0.0310 | 0.3869  | 0.5339 |
| <b>whgrn80_2</b>   | -0.0155  | 0.0337 | 0.2124  | 0.6449 |
| <b>soda80_1</b>    | 0.0383   | 0.0365 | 1.0976  | 0.2948 |
| <b>soda80_2</b>    | 0.0224   | 0.0332 | 0.4549  | 0.5000 |
| <b>soda80_3</b>    | -0.0110  | 0.0326 | 0.1127  | 0.7371 |
| <b>soda80_4</b>    | -0.0348  | 0.0303 | 1.3199  | 0.2506 |
| <b>cig80_1</b>     | -0.5481  | 0.0567 | 93.3824 | <.0001 |
| <b>cig80_2</b>     | -0.1640  | 0.0632 | 6.7247  | 0.0095 |
| <b>cig80_3</b>     | 0.0267   | 0.0510 | 0.2743  | 0.6005 |
| <b>cig80_4</b>     | 0.0657   | 0.0433 | 2.3050  | 0.1290 |
| <b>period_2</b>    | 0.000288 | 0.1409 | 0.0000  | 0.9984 |
| <b>period_3</b>    | 0.0384   | 0.1245 | 0.0950  | 0.7579 |
| <b>period_4</b>    | 0.00928  | 0.0706 | 0.0173  | 0.8954 |
| <b>period_5</b>    | -0.00919 | 0.1263 | 0.0053  | 0.9420 |
| <b>period_6</b>    | 0.0860   | 0.0649 | 1.7538  | 0.1854 |
| <b>period_7</b>    | 0.2740   | 0.1160 | 5.5799  | 0.0182 |
| <b>period_8</b>    | -0.1274  | 0.0630 | 4.0919  | 0.0431 |
| <b>period_9</b>    | -0.0412  | 0.1167 | 0.1243  | 0.7244 |
| <b>period_10</b>   | 0.0417   | 0.0664 | 0.3941  | 0.5301 |
| <b>period_11</b>   | 0.1212   | 0.1194 | 1.0298  | 0.3102 |

|                        |          |        |         |        |
|------------------------|----------|--------|---------|--------|
| <b>mnp_l2</b>          | -0.00666 | 0.0419 | 0.0252  | 0.8738 |
| <b>mnp_l1</b>          | -0.3008  | 0.0583 | 26.6489 | <.0001 |
| <b>pmh_l2</b>          | -0.0390  | 0.0354 | 1.2155  | 0.2702 |
| <b>pmh_l1</b>          | 0.0725   | 0.0393 | 3.4010  | 0.0652 |
| <b>ost_l2</b>          | -0.0192  | 0.0712 | 0.0728  | 0.7872 |
| <b>ost_l1</b>          | 0.2421   | 0.0814 | 8.8484  | 0.0029 |
| <b>rpmeats_l1_1</b>    | 0.0708   | 0.1085 | 0.4264  | 0.5138 |
| <b>rpmeats_l1_1_ti</b> | 0.0719   | 0.0598 | 1.4437  | 0.2295 |
| <b>rpmeats_l1_2</b>    | -0.0380  | 0.0791 | 0.2310  | 0.6308 |
| <b>rpmeats_l1_2_ti</b> | 0.0905   | 0.0459 | 3.8861  | 0.0487 |
| <b>rpmeats_l1_3</b>    | -0.0167  | 0.0736 | 0.0515  | 0.8204 |
| <b>rpmeats_l1_3_ti</b> | 0.0761   | 0.0434 | 3.0727  | 0.0796 |
| <b>rpmeats_l1_4</b>    | -0.0413  | 0.0628 | 0.4324  | 0.5108 |
| <b>rpmeats_l1_4_ti</b> | 0.0510   | 0.0383 | 1.7770  | 0.1825 |
| <b>coff_l1_1</b>       | 0.2627   | 0.1157 | 5.1563  | 0.0232 |
| <b>coff_l1_1_ti</b>    | -0.00957 | 0.0582 | 0.0271  | 0.8693 |
| <b>coff_l1_2</b>       | 0.2111   | 0.1287 | 2.6920  | 0.1009 |
| <b>coff_l1_2_ti</b>    | -0.0515  | 0.0727 | 0.5022  | 0.4785 |
| <b>coff_l1_3</b>       | 0.1696   | 0.1454 | 1.3608  | 0.2434 |
| <b>coff_l1_3_ti</b>    | -0.0355  | 0.0852 | 0.1735  | 0.6770 |
| <b>coff_l1_4</b>       | 0.0266   | 0.0525 | 0.2573  | 0.6120 |
| <b>coff_l1_4_ti</b>    | -0.00352 | 0.0297 | 0.0140  | 0.9058 |
| <b>whgrn_l1_1</b>      | -0.0311  | 0.0878 | 0.1257  | 0.7230 |
| <b>whgrn_l1_1_ti</b>   | -0.0481  | 0.0497 | 0.9381  | 0.3328 |
| <b>whgrn_l1_2</b>      | -0.0367  | 0.0880 | 0.1737  | 0.6769 |
| <b>whgrn_l1_2_ti</b>   | -0.0613  | 0.0505 | 1.4739  | 0.2247 |
| <b>whgrn_l1_3</b>      | 0.00335  | 0.0930 | 0.0013  | 0.9713 |
| <b>whgrn_l1_3_ti</b>   | -0.0106  | 0.0535 | 0.0393  | 0.8430 |
| <b>whgrn_l1_4</b>      | -0.0719  | 0.0966 | 0.5534  | 0.4569 |
| <b>whgrn_l1_4_ti</b>   | 0.0230   | 0.0559 | 0.1698  | 0.6803 |
| <b>soda_l1_1</b>       | 0.1308   | 0.0909 | 2.0708  | 0.1501 |
| <b>soda_l1_1_ti</b>    | 0.000156 | 0.0275 | 0.0000  | 0.9955 |

|                     |          |        |          |        |
|---------------------|----------|--------|----------|--------|
| <b>soda_l1_2</b>    | 0.0864   | 0.0753 | 1.3162   | 0.2513 |
| <b>soda_l1_2_ti</b> | -0.0257  | 0.0231 | 1.2387   | 0.2657 |
| <b>soda_l1_3</b>    | 0.0482   | 0.0738 | 0.4267   | 0.5136 |
| <b>soda_l1_3_ti</b> | -0.00205 | 0.0236 | 0.0075   | 0.9308 |
| <b>soda_l1_4</b>    | 0.0816   | 0.0698 | 1.3661   | 0.2425 |
| <b>soda_l1_4_ti</b> | -0.0153  | 0.0235 | 0.4269   | 0.5135 |
| <b>cal_l1_1</b>     | -0.0735  | 0.0919 | 0.6404   | 0.4236 |
| <b>cal_l1_1_ti</b>  | -0.0839  | 0.0513 | 2.6731   | 0.1021 |
| <b>cal_l1_2</b>     | -0.0950  | 0.0827 | 1.3197   | 0.2506 |
| <b>cal_l1_2_ti</b>  | -0.0207  | 0.0474 | 0.1904   | 0.6626 |
| <b>cal_l1_3</b>     | -0.1307  | 0.0794 | 2.7100   | 0.0997 |
| <b>cal_l1_3_ti</b>  | 0.00246  | 0.0461 | 0.0028   | 0.9576 |
| <b>cal_l1_4</b>     | -0.0343  | 0.0769 | 0.1988   | 0.6557 |
| <b>cal_l1_4_ti</b>  | -0.0273  | 0.0454 | 0.3614   | 0.5477 |
| <b>alc_l1_1</b>     | 0.0904   | 0.0769 | 1.3794   | 0.2402 |
| <b>alc_l1_1_ti</b>  | -0.00132 | 0.0359 | 0.0014   | 0.9706 |
| <b>alc_l1_2</b>     | 0.0445   | 0.0713 | 0.3904   | 0.5321 |
| <b>alc_l1_2_ti</b>  | 0.00383  | 0.0369 | 0.0108   | 0.9173 |
| <b>alc_l1_3</b>     | -0.0747  | 0.0795 | 0.8831   | 0.3474 |
| <b>alc_l1_3_ti</b>  | 0.00381  | 0.0459 | 0.0069   | 0.9338 |
| <b>cig_l2_1</b>     | -0.9683  | 0.0680 | 203.0330 | <.0001 |
| <b>cig_l2_2</b>     | -0.3670  | 0.0723 | 25.7331  | <.0001 |
| <b>cig_l1_2</b>     | -0.9176  | 0.0667 | 189.2240 | <.0001 |
| <b>cig_l2_3</b>     | -0.2395  | 0.0644 | 13.8410  | 0.0002 |
| <b>cig_l1_3</b>     | -0.4283  | 0.0616 | 48.3611  | <.0001 |
| <b>cig_l2_4</b>     | -0.1153  | 0.0575 | 4.0229   | 0.0449 |
| <b>cig_l1_4</b>     | -0.1663  | 0.0562 | 8.7562   | 0.0031 |
| <b>mvi_l2</b>       | 0.00493  | 0.0210 | 0.0552   | 0.8142 |
| <b>mvi_l1</b>       | -0.00468 | 0.0210 | 0.0499   | 0.8232 |
| <b>act_l1_1</b>     | 0.0293   | 0.0387 | 0.5738   | 0.4487 |
| <b>act_l1_1_ti</b>  | -0.0641  | 0.0323 | 3.9364   | 0.0473 |
| <b>act_l1_2</b>     | -0.0189  | 0.0442 | 0.1826   | 0.6691 |



|                    |          |        |        |        |
|--------------------|----------|--------|--------|--------|
| <b>act_l1_2_ti</b> | -0.0366  | 0.0386 | 0.8995 | 0.3429 |
| <b>act_l1_3</b>    | -0.0361  | 0.0750 | 0.2317 | 0.6303 |
| <b>act_l1_3_ti</b> | -0.0656  | 0.0786 | 0.6966 | 0.4039 |
| <b>act_l1_4</b>    | -0.0684  | 0.0519 | 1.7329 | 0.1880 |
| <b>act_l1_4_ti</b> | -0.0193  | 0.0404 | 0.2293 | 0.6321 |
| <b>act_l1_5</b>    | 0.000350 | 0.0873 | 0.0000 | 0.9968 |
| <b>act_l1_5_ti</b> | -0.0307  | 0.0994 | 0.0954 | 0.7574 |
| <b>can_l2</b>      | 0.0283   | 0.1102 | 0.0662 | 0.7970 |
| <b>can_l1</b>      | 0.0572   | 0.0957 | 0.3569 | 0.5502 |
| <b>bmi_l2_1</b>    | 0.00945  | 0.1513 | 0.0039 | 0.9502 |
| <b>bmi_l1_1</b>    | 0.1098   | 0.1337 | 0.6743 | 0.4115 |
| <b>bmi_l2_2</b>    | -0.0691  | 0.1134 | 0.3711 | 0.5424 |
| <b>bmi_l1_2</b>    | 0.2637   | 0.1027 | 6.5960 | 0.0102 |
| <b>bmi_l2_3</b>    | -0.00143 | 0.1079 | 0.0002 | 0.9894 |
| <b>bmi_l1_3</b>    | 0.1564   | 0.0980 | 2.5498 | 0.1103 |
| <b>bmi_l2_4</b>    | 0.00217  | 0.1018 | 0.0005 | 0.9830 |
| <b>bmi_l1_4</b>    | 0.1052   | 0.0926 | 1.2913 | 0.2558 |
| <b>bmi_l2_5</b>    | 0.0930   | 0.0916 | 1.0318 | 0.3097 |
| <b>bmi_l1_5</b>    | -0.0378  | 0.0839 | 0.2037 | 0.6518 |
| <b>chl_l2</b>      | 0.0352   | 0.0448 | 0.6161 | 0.4325 |
| <b>chl_l1</b>      | -0.0871  | 0.0416 | 4.3798 | 0.0364 |
| <b>hbp_l2</b>      | -0.0660  | 0.0558 | 1.3969 | 0.2373 |
| <b>hbp_l1</b>      | -0.00975 | 0.0539 | 0.0327 | 0.8564 |
| <b>sta_l1</b>      | 0.1074   | 0.0479 | 5.0215 | 0.0250 |
| <b>sta_l1_ti</b>   | -0.0712  | 0.0539 | 1.7442 | 0.1866 |
| <b>asn_l2_1</b>    | -0.0207  | 0.0365 | 0.3205 | 0.5713 |
| <b>asn_l1_1</b>    | 0.00239  | 0.0361 | 0.0044 | 0.9472 |
| <b>asn_l2_2</b>    | -0.0182  | 0.0345 | 0.2787 | 0.5976 |
| <b>asn_l1_2</b>    | -0.0388  | 0.0339 | 1.3068 | 0.2530 |
| <b>angcbg_l2</b>   | 0.1063   | 0.1399 | 0.5781 | 0.4471 |
| <b>angcbg_l1</b>   | -0.0401  | 0.1222 | 0.1076 | 0.7429 |
| <b>str_l2</b>      | 0.0738   | 0.2828 | 0.0680 | 0.7942 |

|                     |          |        |          |        |
|---------------------|----------|--------|----------|--------|
| <b>str_l1</b>       | 0.000477 | 0.2391 | 0.0000   | 0.9984 |
| <b>mi_l2</b>        | 0.5263   | 0.3296 | 2.5498   | 0.1103 |
| <b>mi_l1</b>        | -0.0987  | 0.2755 | 0.1282   | 0.7203 |
| <b>mnp</b>          | 0.4629   | 0.0506 | 83.8101  | <.0001 |
| <b>pmh</b>          | -0.2255  | 0.0327 | 47.6141  | <.0001 |
| <b>ost</b>          | -0.3025  | 0.0545 | 30.7768  | <.0001 |
| <b>rpmeats_1</b>    | -0.4221  | 0.0567 | 55.3780  | <.0001 |
| <b>rpmeats_1_ti</b> | 0.0791   | 0.0599 | 1.7457   | 0.1864 |
| <b>rpmeats_2</b>    | -0.2815  | 0.0481 | 34.2569  | <.0001 |
| <b>rpmeats_2_ti</b> | 0.1271   | 0.0469 | 7.3514   | 0.0067 |
| <b>rpmeats_3</b>    | -0.1990  | 0.0451 | 19.4324  | <.0001 |
| <b>rpmeats_3_ti</b> | 0.0876   | 0.0446 | 3.8607   | 0.0494 |
| <b>rpmeats_4</b>    | -0.1472  | 0.0414 | 12.6591  | 0.0004 |
| <b>rpmeats_4_ti</b> | 0.0715   | 0.0399 | 3.2111   | 0.0731 |
| <b>coff_1</b>       | -0.2925  | 0.0843 | 12.0397  | 0.0005 |
| <b>coff_1_ti</b>    | 0.0343   | 0.0578 | 0.3519   | 0.5530 |
| <b>coff_2</b>       | -0.4583  | 0.0732 | 39.1742  | <.0001 |
| <b>coff_2_ti</b>    | 0.1188   | 0.0734 | 2.6212   | 0.1054 |
| <b>coff_3</b>       | -0.1777  | 0.0789 | 5.0792   | 0.0242 |
| <b>coff_3_ti</b>    | -0.0572  | 0.0865 | 0.4376   | 0.5083 |
| <b>coff_4</b>       | -0.1692  | 0.0332 | 25.9925  | <.0001 |
| <b>coff_4_ti</b>    | 0.0371   | 0.0299 | 1.5390   | 0.2148 |
| <b>whgrn_1</b>      | 0.5197   | 0.0498 | 108.9271 | <.0001 |
| <b>whgrn_1_ti</b>   | -0.1709  | 0.0501 | 11.6472  | 0.0006 |
| <b>whgrn_2</b>      | 0.4063   | 0.0468 | 75.3336  | <.0001 |
| <b>whgrn_2_ti</b>   | -0.1408  | 0.0513 | 7.5293   | 0.0061 |
| <b>whgrn_3</b>      | 0.2513   | 0.0458 | 30.1025  | <.0001 |
| <b>whgrn_3_ti</b>   | -0.1072  | 0.0545 | 3.8723   | 0.0491 |
| <b>whgrn_4</b>      | 0.1241   | 0.0459 | 7.2902   | 0.0069 |
| <b>whgrn_4_ti</b>   | 0.00923  | 0.0572 | 0.0261   | 0.8717 |
| <b>soda_1</b>       | 0.0300   | 0.0676 | 0.1971   | 0.6571 |
| <b>soda_1_ti</b>    | -0.0480  | 0.0279 | 2.9603   | 0.0853 |

|                  |          |        |         |        |
|------------------|----------|--------|---------|--------|
| <b>soda_2</b>    | 0.0244   | 0.0562 | 0.1890  | 0.6637 |
| <b>soda_2_ti</b> | -0.0369  | 0.0237 | 2.4312  | 0.1189 |
| <b>soda_3</b>    | 0.0570   | 0.0542 | 1.1054  | 0.2931 |
| <b>soda_3_ti</b> | -0.0350  | 0.0243 | 2.0729  | 0.1499 |
| <b>soda_4</b>    | -0.0561  | 0.0493 | 1.2913  | 0.2558 |
| <b>soda_4_ti</b> | -0.0277  | 0.0243 | 1.2985  | 0.2545 |
| <b>cal_1</b>     | 0.2142   | 0.0581 | 13.5986 | 0.0002 |
| <b>cal_1_ti</b>  | -0.0570  | 0.0514 | 1.2280  | 0.2678 |
| <b>cal_2</b>     | 0.1136   | 0.0510 | 4.9519  | 0.0261 |
| <b>cal_2_ti</b>  | -0.00845 | 0.0479 | 0.0312  | 0.8598 |
| <b>cal_3</b>     | 0.0797   | 0.0474 | 2.8285  | 0.0926 |
| <b>cal_3_ti</b>  | 0.00188  | 0.0470 | 0.0016  | 0.9680 |
| <b>cal_4</b>     | 0.0318   | 0.0440 | 0.5235  | 0.4694 |
| <b>cal_4_ti</b>  | -0.00652 | 0.0467 | 0.0195  | 0.8890 |
| <b>alc_1</b>     | -0.2313  | 0.0550 | 17.7170 | <.0001 |
| <b>alc_1_ti</b>  | -0.0225  | 0.0355 | 0.4033  | 0.5254 |
| <b>alc_2</b>     | -0.2199  | 0.0501 | 19.2649 | <.0001 |
| <b>alc_2_ti</b>  | 0.0109   | 0.0370 | 0.0876  | 0.7672 |
| <b>alc_3</b>     | -0.1150  | 0.0511 | 5.0671  | 0.0244 |
| <b>alc_3_ti</b>  | 0.0469   | 0.0473 | 0.9856  | 0.3208 |

---

(S) Log-linear model to estimate the number of cigarettes smoked per day among smokers

| <b>Variable</b>      | <b>Parameter estimate</b> | <b>Standard error</b> | <b>t value</b> | <b>P value</b> |
|----------------------|---------------------------|-----------------------|----------------|----------------|
| <b>Intercept</b>     | 3.87145                   | 0.09966               | 38.84          | <.0001         |
| <b>fhx</b>           | 0.00256                   | 0.00439               | 0.58           | 0.5599         |
| <b>smkhx</b>         | 0.09018                   | 0.02495               | 3.61           | 0.0003         |
| <b>ochx</b>          | -0.00213                  | 0.00368               | -0.58          | 0.5621         |
| <b>employed_1</b>    | -0.02852                  | 0.00693               | -4.12          | <.0001         |
| <b>employed_2</b>    | -0.00316                  | 0.01043               | -0.30          | 0.7616         |
| <b>employed_3</b>    | -0.02031                  | 0.00553               | -3.67          | 0.0002         |
| <b>employed_4</b>    | -0.03966                  | 0.00763               | -5.20          | <.0001         |
| <b>employed_5</b>    | -0.02373                  | 0.00521               | -4.56          | <.0001         |
| <b>employed_6</b>    | 0.00141                   | 0.00779               | 0.18           | 0.8564         |
| <b>employed_miss</b> | -0.04647                  | 0.02341               | -1.98          | 0.0472         |
| <b>mar80</b>         | -0.00725                  | 0.00553               | -1.31          | 0.1897         |
| <b>college</b>       | -0.00963                  | 0.00415               | -2.32          | 0.0202         |
| <b>stress82</b>      | 0.00682                   | 0.00438               | 1.56           | 0.1193         |
| <b>stress82_miss</b> | 0.05902                   | 0.02202               | 2.68           | 0.0074         |
| <b>hhighsch</b>      | -0.01827                  | 0.00442               | -4.14          | <.0001         |
| <b>hcollege</b>      | -0.01722                  | 0.00496               | -3.47          | 0.0005         |
| <b>hgradsch</b>      | -0.02643                  | 0.00558               | -4.74          | <.0001         |
| <b>lbmi18_2</b>      | -0.00314                  | 0.00423               | -0.74          | 0.4588         |
| <b>lbmi18_3</b>      | -0.00535                  | 0.00620               | -0.86          | 0.3882         |
| <b>lbmi18_4</b>      | -0.01308                  | 0.01337               | -0.98          | 0.3280         |
| <b>baseage</b>       | -0.00879                  | 0.00378               | -2.33          | 0.0201         |
| <b>baseage_sq</b>    | 0.00005188                | 0.00003746            | 1.38           | 0.1661         |
| <b>bmi80_1</b>       | -0.00990                  | 0.02403               | -0.41          | 0.6805         |
| <b>bmi80_2</b>       | -0.01315                  | 0.01985               | -0.66          | 0.5076         |
| <b>bmi80_3</b>       | -0.00501                  | 0.01927               | -0.26          | 0.7948         |
| <b>bmi80_4</b>       | -0.00425                  | 0.01863               | -0.23          | 0.8194         |
| <b>bmi80_5</b>       | 0.02065                   | 0.01798               | 1.15           | 0.2508         |
| <b>act80_1</b>       | 0.00641                   | 0.00503               | 1.27           | 0.2025         |

|                    |             |         |        |        |
|--------------------|-------------|---------|--------|--------|
| <b>act80_2</b>     | 0.00829     | 0.00603 | 1.37   | 0.1693 |
| <b>act80_3</b>     | 0.00662     | 0.00534 | 1.24   | 0.2155 |
| <b>alc80_1</b>     | 0.00872     | 0.00574 | 1.52   | 0.1289 |
| <b>alc80_2</b>     | -0.00754    | 0.00542 | -1.39  | 0.1643 |
| <b>alc80_3</b>     | -0.00673    | 0.00611 | -1.10  | 0.2707 |
| <b>rpmeats80_1</b> | 0.00200     | 0.01267 | 0.16   | 0.8746 |
| <b>rpmeats80_2</b> | -0.00840    | 0.00657 | -1.28  | 0.2009 |
| <b>rpmeats80_3</b> | -0.00014186 | 0.00526 | -0.03  | 0.9785 |
| <b>rpmeats80_4</b> | -0.00328    | 0.00470 | -0.70  | 0.4853 |
| <b>coff80_1</b>    | -0.00673    | 0.00572 | -1.17  | 0.2400 |
| <b>coff80_2</b>    | -0.00715    | 0.00859 | -0.83  | 0.4047 |
| <b>coff80_3</b>    | 0.00474     | 0.01203 | 0.39   | 0.6938 |
| <b>whgrn80_1</b>   | -0.00885    | 0.00550 | -1.61  | 0.1076 |
| <b>whgrn80_2</b>   | -0.01091    | 0.00605 | -1.80  | 0.0712 |
| <b>soda80_1</b>    | -0.00792    | 0.00633 | -1.25  | 0.2110 |
| <b>soda80_2</b>    | -0.01539    | 0.00578 | -2.66  | 0.0078 |
| <b>soda80_3</b>    | -0.01309    | 0.00576 | -2.27  | 0.0230 |
| <b>soda80_4</b>    | -0.01389    | 0.00532 | -2.61  | 0.0091 |
| <b>cig80_1</b>     | -0.26888    | 0.01065 | -25.25 | <.0001 |
| <b>cig80_2</b>     | -0.47171    | 0.01216 | -38.78 | <.0001 |
| <b>cig80_3</b>     | -0.30503    | 0.00860 | -35.45 | <.0001 |
| <b>cig80_4</b>     | -0.13644    | 0.00690 | -19.77 | <.0001 |
| <b>period_2</b>    | 0.19080     | 0.02493 | 7.65   | <.0001 |
| <b>period_3</b>    | 0.09460     | 0.02178 | 4.34   | <.0001 |
| <b>period_4</b>    | 0.09400     | 0.01239 | 7.58   | <.0001 |
| <b>period_5</b>    | 0.08181     | 0.02219 | 3.69   | 0.0002 |
| <b>period_6</b>    | 0.08489     | 0.01130 | 7.51   | <.0001 |
| <b>period_7</b>    | 0.05969     | 0.02018 | 2.96   | 0.0031 |
| <b>period_8</b>    | 0.04165     | 0.01132 | 3.68   | 0.0002 |
| <b>period_9</b>    | 0.03381     | 0.02053 | 1.65   | 0.0996 |
| <b>period_10</b>   | 0.02772     | 0.01167 | 2.38   | 0.0176 |
| <b>period_11</b>   | 0.03872     | 0.02085 | 1.86   | 0.0633 |

|                        |            |         |       |        |
|------------------------|------------|---------|-------|--------|
| <b>mnp_l2</b>          | 0.00561    | 0.00730 | 0.77  | 0.4421 |
| <b>mnp_l1</b>          | 0.00994    | 0.00932 | 1.07  | 0.2861 |
| <b>pmh_l2</b>          | -0.00354   | 0.00632 | -0.56 | 0.5748 |
| <b>pmh_l1</b>          | 0.00279    | 0.00699 | 0.40  | 0.6892 |
| <b>ost_l2</b>          | 0.00624    | 0.01274 | 0.49  | 0.6244 |
| <b>ost_l1</b>          | -0.00732   | 0.01523 | -0.48 | 0.6309 |
| <b>rpmeats_l1_1</b>    | -0.02651   | 0.01962 | -1.35 | 0.1766 |
| <b>rpmeats_l1_1_ti</b> | 0.00204    | 0.01081 | 0.19  | 0.8500 |
| <b>rpmeats_l1_2</b>    | -0.00417   | 0.01407 | -0.30 | 0.7667 |
| <b>rpmeats_l1_2_ti</b> | -0.00738   | 0.00813 | -0.91 | 0.3641 |
| <b>rpmeats_l1_3</b>    | 0.00164    | 0.01274 | 0.13  | 0.8973 |
| <b>rpmeats_l1_3_ti</b> | -0.01032   | 0.00750 | -1.38 | 0.1690 |
| <b>rpmeats_l1_4</b>    | 0.00432    | 0.01072 | 0.40  | 0.6869 |
| <b>rpmeats_l1_4_ti</b> | -0.00861   | 0.00656 | -1.31 | 0.1891 |
| <b>coff_l1_1</b>       | 0.07170    | 0.01946 | 3.69  | 0.0002 |
| <b>coff_l1_1_ti</b>    | -0.01820   | 0.00967 | -1.88 | 0.0600 |
| <b>coff_l1_2</b>       | 0.02092    | 0.02312 | 0.90  | 0.3657 |
| <b>coff_l1_2_ti</b>    | -0.00144   | 0.01311 | -0.11 | 0.9127 |
| <b>coff_l1_3</b>       | 0.02334    | 0.02560 | 0.91  | 0.3618 |
| <b>coff_l1_3_ti</b>    | -0.01291   | 0.01507 | -0.86 | 0.3918 |
| <b>coff_l1_4</b>       | 0.00036678 | 0.00927 | 0.04  | 0.9684 |
| <b>coff_l1_4_ti</b>    | -0.00241   | 0.00521 | -0.46 | 0.6434 |
| <b>whgrn_l1_1</b>      | -0.02752   | 0.01614 | -1.70 | 0.0882 |
| <b>whgrn_l1_1_ti</b>   | 0.01254    | 0.00904 | 1.39  | 0.1654 |
| <b>whgrn_l1_2</b>      | -0.05394   | 0.01632 | -3.30 | 0.0010 |
| <b>whgrn_l1_2_ti</b>   | 0.02976    | 0.00927 | 3.21  | 0.0013 |
| <b>whgrn_l1_3</b>      | -0.02303   | 0.01733 | -1.33 | 0.1838 |
| <b>whgrn_l1_3_ti</b>   | 0.01057    | 0.00987 | 1.07  | 0.2841 |
| <b>whgrn_l1_4</b>      | -0.06206   | 0.01845 | -3.36 | 0.0008 |
| <b>whgrn_l1_4_ti</b>   | 0.03461    | 0.01056 | 3.28  | 0.0010 |
| <b>soda_l1_1</b>       | -0.00863   | 0.01567 | -0.55 | 0.5820 |
| <b>soda_l1_1_ti</b>    | 0.00196    | 0.00463 | 0.42  | 0.6726 |

|                     |             |         |         |        |
|---------------------|-------------|---------|---------|--------|
| <b>soda_l1_2</b>    | 0.00633     | 0.01323 | 0.48    | 0.6323 |
| <b>soda_l1_2_ti</b> | -0.00190    | 0.00400 | -0.47   | 0.6355 |
| <b>soda_l1_3</b>    | 0.00619     | 0.01299 | 0.48    | 0.6339 |
| <b>soda_l1_3_ti</b> | 0.00017413  | 0.00410 | 0.04    | 0.9661 |
| <b>soda_l1_4</b>    | 0.01309     | 0.01239 | 1.06    | 0.2908 |
| <b>soda_l1_4_ti</b> | -0.00369    | 0.00414 | -0.89   | 0.3733 |
| <b>cal_l1_1</b>     | 0.00216     | 0.01574 | 0.14    | 0.8909 |
| <b>cal_l1_1_ti</b>  | -0.00238    | 0.00880 | -0.27   | 0.7871 |
| <b>cal_l1_2</b>     | 0.01771     | 0.01429 | 1.24    | 0.2153 |
| <b>cal_l1_2_ti</b>  | -0.00624    | 0.00818 | -0.76   | 0.4458 |
| <b>cal_l1_3</b>     | -0.00085258 | 0.01378 | -0.06   | 0.9507 |
| <b>cal_l1_3_ti</b>  | 0.00100     | 0.00799 | 0.13    | 0.9003 |
| <b>cal_l1_4</b>     | 0.00291     | 0.01320 | 0.22    | 0.8257 |
| <b>cal_l1_4_ti</b>  | -0.00311    | 0.00781 | -0.40   | 0.6905 |
| <b>alc_l1_1</b>     | 0.00315     | 0.01330 | 0.24    | 0.8126 |
| <b>alc_l1_1_ti</b>  | 0.01078     | 0.00606 | 1.78    | 0.0755 |
| <b>alc_l1_2</b>     | 0.01192     | 0.01251 | 0.95    | 0.3410 |
| <b>alc_l1_2_ti</b>  | 0.00127     | 0.00642 | 0.20    | 0.8438 |
| <b>alc_l1_3</b>     | 0.00365     | 0.01428 | 0.26    | 0.7982 |
| <b>alc_l1_3_ti</b>  | 0.00170     | 0.00825 | 0.21    | 0.8365 |
| <b>cig_l2_1</b>     | -0.45548    | 0.01171 | -38.88  | <.0001 |
| <b>cig_l1_1</b>     | -0.96289    | 0.01153 | -83.52  | <.0001 |
| <b>cig_l2_2</b>     | -0.65621    | 0.01269 | -51.72  | <.0001 |
| <b>cig_l1_2</b>     | -1.41963    | 0.01168 | -121.52 | <.0001 |
| <b>cig_l2_3</b>     | -0.39159    | 0.01018 | -38.49  | <.0001 |
| <b>cig_l1_3</b>     | -0.73787    | 0.00964 | -76.54  | <.0001 |
| <b>cig_l2_4</b>     | -0.17899    | 0.00866 | -20.67  | <.0001 |
| <b>cig_l1_4</b>     | -0.31224    | 0.00838 | -37.24  | <.0001 |
| <b>mvi_l2</b>       | -0.00018719 | 0.00369 | -0.05   | 0.9596 |
| <b>mvi_l1</b>       | -0.00557    | 0.00368 | -1.51   | 0.1303 |
| <b>act_l1_1</b>     | 0.03527     | 0.00683 | 5.16    | <.0001 |
| <b>act_l1_1_ti</b>  | -0.01608    | 0.00563 | -2.86   | 0.0043 |

|                    |             |         |       |        |
|--------------------|-------------|---------|-------|--------|
| <b>act_l1_2</b>    | 0.01920     | 0.00786 | 2.44  | 0.0146 |
| <b>act_l1_2_ti</b> | -0.01832    | 0.00680 | -2.69 | 0.0071 |
| <b>act_l1_3</b>    | 0.00887     | 0.01355 | 0.65  | 0.5126 |
| <b>act_l1_3_ti</b> | -0.02884    | 0.01452 | -1.99 | 0.0470 |
| <b>act_l1_4</b>    | 0.00870     | 0.00935 | 0.93  | 0.3521 |
| <b>act_l1_4_ti</b> | -0.01021    | 0.00711 | -1.44 | 0.1507 |
| <b>act_l1_5</b>    | -0.02615    | 0.01582 | -1.65 | 0.0982 |
| <b>act_l1_5_ti</b> | -0.00787    | 0.01867 | -0.42 | 0.6736 |
| <b>can_l2</b>      | 0.00394     | 0.01870 | 0.21  | 0.8333 |
| <b>can_l1</b>      | 0.00225     | 0.01614 | 0.14  | 0.8891 |
| <b>bmi_l2_1</b>    | -0.04035    | 0.02656 | -1.52 | 0.1287 |
| <b>bmi_l1_1</b>    | -0.02024    | 0.02363 | -0.86 | 0.3917 |
| <b>bmi_l2_2</b>    | -0.06246    | 0.02066 | -3.02 | 0.0025 |
| <b>bmi_l1_2</b>    | 0.02134     | 0.01843 | 1.16  | 0.2470 |
| <b>bmi_l2_3</b>    | -0.05428    | 0.01975 | -2.75 | 0.0060 |
| <b>bmi_l1_3</b>    | 0.02599     | 0.01766 | 1.47  | 0.1412 |
| <b>bmi_l2_4</b>    | -0.04088    | 0.01874 | -2.18 | 0.0292 |
| <b>bmi_l1_4</b>    | 0.02107     | 0.01674 | 1.26  | 0.2083 |
| <b>bmi_l2_5</b>    | -0.04295    | 0.01691 | -2.54 | 0.0111 |
| <b>bmi_l1_5</b>    | 0.03141     | 0.01531 | 2.05  | 0.0402 |
| <b>chl_l2</b>      | 0.00791     | 0.00808 | 0.98  | 0.3277 |
| <b>chl_l1</b>      | -0.00345    | 0.00751 | -0.46 | 0.6463 |
| <b>hbp_l2</b>      | -0.00342    | 0.00975 | -0.35 | 0.7260 |
| <b>hbp_l1</b>      | -0.00320    | 0.00937 | -0.34 | 0.7327 |
| <b>sta_l1</b>      | -0.00097794 | 0.00848 | -0.12 | 0.9082 |
| <b>sta_l1_ti</b>   | -0.00353    | 0.01003 | -0.35 | 0.7246 |
| <b>asn_l2_1</b>    | 0.00073248  | 0.00644 | 0.11  | 0.9094 |
| <b>asn_l1_1</b>    | -0.00918    | 0.00633 | -1.45 | 0.1471 |
| <b>asn_l2_2</b>    | -0.01159    | 0.00609 | -1.90 | 0.0571 |
| <b>asn_l1_2</b>    | -0.01331    | 0.00597 | -2.23 | 0.0259 |
| <b>angcbg_l2</b>   | 0.05851     | 0.02495 | 2.34  | 0.0190 |
| <b>angcbg_l1</b>   | -0.02501    | 0.02201 | -1.14 | 0.2557 |



|                     |             |         |       |        |
|---------------------|-------------|---------|-------|--------|
| <b>str_l2</b>       | 0.12094     | 0.04872 | 2.48  | 0.0131 |
| <b>str_l1</b>       | -0.04183    | 0.04112 | -1.02 | 0.3090 |
| <b>mi_l2</b>        | 0.03157     | 0.05475 | 0.58  | 0.5642 |
| <b>mi_l1</b>        | -0.00245    | 0.04801 | -0.05 | 0.9593 |
| <b>mnp</b>          | -0.01202    | 0.00790 | -1.52 | 0.1280 |
| <b>pmh</b>          | 0.00004250  | 0.00585 | 0.01  | 0.9942 |
| <b>ost</b>          | 0.00201     | 0.01078 | 0.19  | 0.8519 |
| <b>rpmeats_1</b>    | -0.03433    | 0.01019 | -3.37 | 0.0008 |
| <b>rpmeats_1_ti</b> | 0.00785     | 0.01086 | 0.72  | 0.4694 |
| <b>rpmeats_2</b>    | -0.03065    | 0.00832 | -3.68 | 0.0002 |
| <b>rpmeats_2_ti</b> | -0.00121    | 0.00826 | -0.15 | 0.8835 |
| <b>rpmeats_3</b>    | -0.02617    | 0.00766 | -3.42 | 0.0006 |
| <b>rpmeats_3_ti</b> | -0.00065483 | 0.00769 | -0.09 | 0.9321 |
| <b>rpmeats_4</b>    | -0.01959    | 0.00691 | -2.83 | 0.0046 |
| <b>rpmeats_4_ti</b> | -0.00345    | 0.00678 | -0.51 | 0.6108 |
| <b>coff_1</b>       | -0.05398    | 0.01499 | -3.60 | 0.0003 |
| <b>coff_1_ti</b>    | -0.01518    | 0.00959 | -1.58 | 0.1133 |
| <b>coff_2</b>       | -0.05594    | 0.01404 | -3.98 | <.0001 |
| <b>coff_2_ti</b>    | 0.00263     | 0.01319 | 0.20  | 0.8417 |
| <b>coff_3</b>       | -0.05182    | 0.01442 | -3.59 | 0.0003 |
| <b>coff_3_ti</b>    | -0.00676    | 0.01546 | -0.44 | 0.6618 |
| <b>coff_4</b>       | -0.03186    | 0.00586 | -5.44 | <.0001 |
| <b>coff_4_ti</b>    | 0.00365     | 0.00522 | 0.70  | 0.4847 |
| <b>whgrn_1</b>      | 0.04722     | 0.00907 | 5.21  | <.0001 |
| <b>whgrn_1_ti</b>   | -0.00818    | 0.00912 | -0.90 | 0.3695 |
| <b>whgrn_2</b>      | 0.02653     | 0.00868 | 3.06  | 0.0022 |
| <b>whgrn_2_ti</b>   | 0.01323     | 0.00942 | 1.40  | 0.1602 |
| <b>whgrn_3</b>      | 0.00917     | 0.00870 | 1.05  | 0.2919 |
| <b>whgrn_3_ti</b>   | 0.00358     | 0.01009 | 0.36  | 0.7225 |
| <b>whgrn_4</b>      | 0.00007329  | 0.00893 | 0.01  | 0.9934 |
| <b>whgrn_4_ti</b>   | 0.02084     | 0.01081 | 1.93  | 0.0540 |
| <b>soda_1</b>       | -0.00570    | 0.01187 | -0.48 | 0.6309 |

|                  |          |         |       |        |
|------------------|----------|---------|-------|--------|
| <b>soda_1_ti</b> | 0.00411  | 0.00473 | 0.87  | 0.3851 |
| <b>soda_2</b>    | -0.02476 | 0.00993 | -2.49 | 0.0127 |
| <b>soda_2_ti</b> | 0.00582  | 0.00411 | 1.42  | 0.1566 |
| <b>soda_3</b>    | -0.03206 | 0.00956 | -3.35 | 0.0008 |
| <b>soda_3_ti</b> | 0.00753  | 0.00422 | 1.79  | 0.0741 |
| <b>soda_4</b>    | -0.02632 | 0.00884 | -2.98 | 0.0029 |
| <b>soda_4_ti</b> | 0.00594  | 0.00427 | 1.39  | 0.1640 |
| <b>cal_1</b>     | 0.01317  | 0.01012 | 1.30  | 0.1932 |
| <b>cal_1_ti</b>  | -0.00840 | 0.00880 | -0.96 | 0.3396 |
| <b>cal_2</b>     | 0.00841  | 0.00896 | 0.94  | 0.3481 |
| <b>cal_2_ti</b>  | -0.01112 | 0.00826 | -1.35 | 0.1781 |
| <b>cal_3</b>     | 0.00172  | 0.00831 | 0.21  | 0.8358 |
| <b>cal_3_ti</b>  | 0.00215  | 0.00814 | 0.26  | 0.7912 |
| <b>cal_4</b>     | -0.00616 | 0.00772 | -0.80 | 0.4250 |
| <b>cal_4_ti</b>  | -0.00186 | 0.00804 | -0.23 | 0.8172 |
| <b>alc_1</b>     | -0.04167 | 0.00971 | -4.29 | <.0001 |
| <b>alc_1_ti</b>  | 0.01078  | 0.00598 | 1.80  | 0.0716 |
| <b>alc_2</b>     | -0.04168 | 0.00891 | -4.68 | <.0001 |
| <b>alc_2_ti</b>  | -0.00172 | 0.00641 | -0.27 | 0.7887 |
| <b>alc_3</b>     | -0.02860 | 0.00900 | -3.18 | 0.0015 |
| <b>alc_3_ti</b>  | -0.00516 | 0.00840 | -0.61 | 0.5390 |

---

(T) Logistic model to estimate the probability of taking multivitamins

| <b>Parameter</b>     | <b>Log odds ratio</b> | <b>Standard error</b> | <b>Wald chi-square</b> | <b>P value</b> |
|----------------------|-----------------------|-----------------------|------------------------|----------------|
| <b>Intercept</b>     | -0.7621               | 0.1703                | 20.0360                | <.0001         |
| <b>fhx</b>           | -0.00010              | 0.00769               | 0.0002                 | 0.9894         |
| <b>smkhx</b>         | 0.0186                | 0.00725               | 6.6019                 | 0.0102         |
| <b>ochx</b>          | 0.0291                | 0.00661               | 19.4177                | <.0001         |
| <b>employed_1</b>    | -0.00952              | 0.0122                | 0.6065                 | 0.4361         |
| <b>employed_2</b>    | 0.00798               | 0.0194                | 0.1699                 | 0.6802         |
| <b>employed_3</b>    | -0.0157               | 0.00982               | 2.5559                 | 0.1099         |
| <b>employed_4</b>    | -0.0415               | 0.0128                | 10.4865                | 0.0012         |
| <b>employed_5</b>    | -0.0227               | 0.00910               | 6.2431                 | 0.0125         |
| <b>employed_6</b>    | 0.0144                | 0.0135                | 1.1367                 | 0.2864         |
| <b>employed_miss</b> | -0.0177               | 0.0435                | 0.1657                 | 0.6840         |
| <b>mar80</b>         | -0.00900              | 0.0116                | 0.6063                 | 0.4362         |
| <b>college</b>       | 0.0487                | 0.00702               | 48.0601                | <.0001         |
| <b>stress82</b>      | 0.0364                | 0.00728               | 24.9678                | <.0001         |
| <b>stress82_miss</b> | 0.0150                | 0.0404                | 0.1388                 | 0.7095         |
| <b>hhighsch</b>      | -0.0115               | 0.00845               | 1.8546                 | 0.1733         |
| <b>hcollege</b>      | 0.0263                | 0.00920               | 8.1913                 | 0.0042         |
| <b>hgradsch</b>      | 0.0240                | 0.00975               | 6.0363                 | 0.0140         |
| <b>lbmi18_2</b>      | -0.0109               | 0.00772               | 1.9900                 | 0.1583         |
| <b>lbmi18_3</b>      | -0.0112               | 0.0123                | 0.8315                 | 0.3618         |
| <b>lbmi18_4</b>      | 0.0230                | 0.0290                | 0.6267                 | 0.4286         |
| <b>baseage</b>       | 0.0107                | 0.00657               | 2.6452                 | 0.1039         |
| <b>baseage_sq</b>    | -0.00004              | 0.000065              | 0.3012                 | 0.5832         |
| <b>bmi80_1</b>       | -0.1371               | 0.0435                | 9.9167                 | 0.0016         |
| <b>bmi80_2</b>       | -0.0922               | 0.0291                | 10.0310                | 0.0015         |
| <b>bmi80_3</b>       | -0.1007               | 0.0277                | 13.2403                | 0.0003         |
| <b>bmi80_4</b>       | -0.0842               | 0.0263                | 10.2835                | 0.0013         |
| <b>bmi80_5</b>       | -0.0600               | 0.0251                | 5.6853                 | 0.0171         |

|                    |          |         |           |        |
|--------------------|----------|---------|-----------|--------|
| <b>act80_1</b>     | -0.0203  | 0.00898 | 5.1031    | 0.0239 |
| <b>act80_2</b>     | -0.0236  | 0.0105  | 5.0766    | 0.0243 |
| <b>act80_3</b>     | 0.00985  | 0.00932 | 1.1176    | 0.2904 |
| <b>alc80_1</b>     | -0.0438  | 0.0108  | 16.5276   | <.0001 |
| <b>alc80_2</b>     | -0.0388  | 0.0102  | 14.3959   | 0.0001 |
| <b>alc80_3</b>     | -0.0118  | 0.0113  | 1.0827    | 0.2981 |
| <b>rpmeats80_1</b> | -0.0140  | 0.0179  | 0.6108    | 0.4345 |
| <b>rpmeats80_2</b> | 0.0138   | 0.0111  | 1.5512    | 0.2130 |
| <b>rpmeats80_3</b> | 0.00604  | 0.00940 | 0.4136    | 0.5201 |
| <b>rpmeats80_4</b> | 0.00766  | 0.00845 | 0.8206    | 0.3650 |
| <b>coff80_1</b>    | 0.0387   | 0.00910 | 18.0935   | <.0001 |
| <b>coff80_2</b>    | 0.0531   | 0.0129  | 16.8703   | <.0001 |
| <b>coff80_3</b>    | 0.0602   | 0.0201  | 8.9934    | 0.0027 |
| <b>whgrn80_1</b>   | -0.0560  | 0.00913 | 37.6205   | <.0001 |
| <b>whgrn80_2</b>   | -0.00067 | 0.00972 | 0.0048    | 0.9450 |
| <b>soda80_1</b>    | -0.0453  | 0.0117  | 15.0132   | 0.0001 |
| <b>soda80_2</b>    | -0.0242  | 0.0103  | 5.5733    | 0.0182 |
| <b>soda80_3</b>    | -0.00277 | 0.0101  | 0.0755    | 0.7835 |
| <b>soda80_4</b>    | -0.0102  | 0.00966 | 1.1206    | 0.2898 |
| <b>cig80_1</b>     | 0.0362   | 0.0259  | 1.9548    | 0.1621 |
| <b>cig80_2</b>     | 0.0527   | 0.0324  | 2.6400    | 0.1042 |
| <b>cig80_3</b>     | 0.0131   | 0.0282  | 0.2159    | 0.6422 |
| <b>cig80_4</b>     | -0.00753 | 0.0248  | 0.0921    | 0.7615 |
| <b>period_2</b>    | -0.6088  | 0.0469  | 168.1350  | <.0001 |
| <b>period_3</b>    | -0.9865  | 0.0385  | 656.8487  | <.0001 |
| <b>period_4</b>    | -1.0053  | 0.0204  | 2436.6365 | <.0001 |
| <b>period_5</b>    | -0.8349  | 0.0384  | 472.7764  | <.0001 |
| <b>period_6</b>    | -0.5150  | 0.0175  | 864.7600  | <.0001 |
| <b>period_7</b>    | -0.3967  | 0.0347  | 130.5267  | <.0001 |
| <b>period_8</b>    | -0.0781  | 0.0170  | 21.1451   | <.0001 |
| <b>period_9</b>    | 0.0407   | 0.0351  | 1.3447    | 0.2462 |
| <b>period_10</b>   | -0.0597  | 0.0169  | 12.5077   | 0.0004 |

|                        |         |        |          |        |
|------------------------|---------|--------|----------|--------|
| <b>period_l1</b>       | 0.1087  | 0.0352 | 9.5186   | 0.0020 |
| <b>mnp_l2</b>          | -0.0220 | 0.0137 | 2.5863   | 0.1078 |
| <b>mnp_l1</b>          | -0.0457 | 0.0178 | 6.6015   | 0.0102 |
| <b>pmh_l2</b>          | 0.1050  | 0.0103 | 104.7025 | <.0001 |
| <b>pmh_l1</b>          | 0.0344  | 0.0114 | 9.0771   | 0.0026 |
| <b>ost_l2</b>          | -0.0588 | 0.0215 | 7.4551   | 0.0063 |
| <b>ost_l1</b>          | -0.0335 | 0.0260 | 1.6588   | 0.1978 |
| <b>rpmeats_l1_1</b>    | -0.7013 | 0.0394 | 317.3819 | <.0001 |
| <b>rpmeats_l1_1_ti</b> | 0.4257  | 0.0207 | 422.0671 | <.0001 |
| <b>rpmeats_l1_2</b>    | -0.4213 | 0.0302 | 194.5425 | <.0001 |
| <b>rpmeats_l1_2_ti</b> | 0.2680  | 0.0166 | 260.8748 | <.0001 |
| <b>rpmeats_l1_3</b>    | -0.2012 | 0.0281 | 51.0866  | <.0001 |
| <b>rpmeats_l1_3_ti</b> | 0.1419  | 0.0158 | 81.1039  | <.0001 |
| <b>rpmeats_l1_4</b>    | -0.1648 | 0.0240 | 47.0656  | <.0001 |
| <b>rpmeats_l1_4_ti</b> | 0.1110  | 0.0139 | 63.4637  | <.0001 |
| <b>coff_l1_1</b>       | -0.1884 | 0.0332 | 32.1848  | <.0001 |
| <b>coff_l1_1_ti</b>    | 0.0671  | 0.0164 | 16.7570  | <.0001 |
| <b>coff_l1_2</b>       | -0.3644 | 0.0404 | 81.4910  | <.0001 |
| <b>coff_l1_2_ti</b>    | 0.1853  | 0.0214 | 74.6999  | <.0001 |
| <b>coff_l1_3</b>       | -0.4219 | 0.0460 | 83.9765  | <.0001 |
| <b>coff_l1_3_ti</b>    | 0.2140  | 0.0252 | 72.1403  | <.0001 |
| <b>coff_l1_4</b>       | -0.0650 | 0.0208 | 9.7284   | 0.0018 |
| <b>coff_l1_4_ti</b>    | 0.0242  | 0.0113 | 4.5470   | 0.0330 |
| <b>whgrn_l1_1</b>      | 0.8171  | 0.0317 | 666.2872 | <.0001 |
| <b>whgrn_l1_1_ti</b>   | -0.5183 | 0.0171 | 922.5413 | <.0001 |
| <b>whgrn_l1_2</b>      | 0.5660  | 0.0315 | 323.4634 | <.0001 |
| <b>whgrn_l1_2_ti</b>   | -0.3475 | 0.0171 | 413.7291 | <.0001 |
| <b>whgrn_l1_3</b>      | 0.4443  | 0.0326 | 185.2551 | <.0001 |
| <b>whgrn_l1_3_ti</b>   | -0.2667 | 0.0177 | 227.9912 | <.0001 |
| <b>whgrn_l1_4</b>      | 0.0961  | 0.0335 | 8.2055   | 0.0042 |
| <b>whgrn_l1_4_ti</b>   | -0.0611 | 0.0181 | 11.3420  | 0.0008 |
| <b>soda_l1_1</b>       | -0.0351 | 0.0286 | 1.4994   | 0.2208 |

|                     |          |         |            |        |
|---------------------|----------|---------|------------|--------|
| <b>soda_l1_1_ti</b> | 0.0113   | 0.00933 | 1.4610     | 0.2268 |
| <b>soda_l1_2</b>    | 0.0477   | 0.0235  | 4.1208     | 0.0424 |
| <b>soda_l1_2_ti</b> | -0.0150  | 0.00766 | 3.8403     | 0.0500 |
| <b>soda_l1_3</b>    | 0.0381   | 0.0229  | 2.7717     | 0.0959 |
| <b>soda_l1_3_ti</b> | -0.0171  | 0.00772 | 4.8782     | 0.0272 |
| <b>soda_l1_4</b>    | 0.0121   | 0.0224  | 0.2916     | 0.5892 |
| <b>soda_l1_4_ti</b> | -0.00297 | 0.00794 | 0.1396     | 0.7087 |
| <b>cal_l1_1</b>     | 0.1378   | 0.0343  | 16.1742    | <.0001 |
| <b>cal_l1_1_ti</b>  | -0.0863  | 0.0184  | 22.0671    | <.0001 |
| <b>cal_l1_2</b>     | 0.0119   | 0.0310  | 0.1481     | 0.7003 |
| <b>cal_l1_2_ti</b>  | -0.0256  | 0.0169  | 2.3090     | 0.1286 |
| <b>cal_l1_3</b>     | 0.0362   | 0.0295  | 1.5027     | 0.2203 |
| <b>cal_l1_3_ti</b>  | -0.0190  | 0.0162  | 1.3734     | 0.2412 |
| <b>cal_l1_4</b>     | -0.0227  | 0.0283  | 0.6428     | 0.4227 |
| <b>cal_l1_4_ti</b>  | 0.0125   | 0.0157  | 0.6307     | 0.4271 |
| <b>alc_l1_1</b>     | 0.1775   | 0.0287  | 38.2796    | <.0001 |
| <b>alc_l1_1_ti</b>  | -0.1150  | 0.0133  | 74.6294    | <.0001 |
| <b>alc_l1_2</b>     | 0.1149   | 0.0280  | 16.8640    | <.0001 |
| <b>alc_l1_2_ti</b>  | -0.0762  | 0.0141  | 29.2460    | <.0001 |
| <b>alc_l1_3</b>     | 0.0411   | 0.0324  | 1.6109     | 0.2044 |
| <b>alc_l1_3_ti</b>  | -0.0254  | 0.0177  | 2.0575     | 0.1515 |
| <b>cig_l2_1</b>     | 0.0236   | 0.0410  | 0.3319     | 0.5645 |
| <b>cig_l1_1</b>     | -0.0795  | 0.0465  | 2.9272     | 0.0871 |
| <b>cig_l2_2</b>     | -0.0162  | 0.0477  | 0.1154     | 0.7340 |
| <b>cig_l1_2</b>     | -0.1284  | 0.0528  | 5.9138     | 0.0150 |
| <b>cig_l2_3</b>     | 0.0266   | 0.0419  | 0.4014     | 0.5264 |
| <b>cig_l1_3</b>     | -0.1253  | 0.0465  | 7.2703     | 0.0070 |
| <b>cig_l2_4</b>     | -0.00010 | 0.0370  | 0.0000     | 0.9979 |
| <b>cig_l1_4</b>     | -0.1052  | 0.0411  | 6.5516     | 0.0105 |
| <b>mvi_l2</b>       | 0.9008   | 0.00640 | 19823.4057 | <.0001 |
| <b>mvi_l1</b>       | 1.6289   | 0.00637 | 65327.9830 | <.0001 |
| <b>act_l1_1</b>     | -0.1158  | 0.0104  | 122.8841   | <.0001 |

|                    |          |        |          |        |
|--------------------|----------|--------|----------|--------|
| <b>act_l1_1_ti</b> | 0.1230   | 0.0105 | 136.3506 | <.0001 |
| <b>act_l1_2</b>    | -0.00982 | 0.0120 | 0.6721   | 0.4123 |
| <b>act_l1_2_ti</b> | 0.0555   | 0.0125 | 19.7805  | <.0001 |
| <b>act_l1_3</b>    | 0.0611   | 0.0208 | 8.6128   | 0.0033 |
| <b>act_l1_3_ti</b> | 0.0332   | 0.0257 | 1.6679   | 0.1965 |
| <b>act_l1_4</b>    | 0.0137   | 0.0136 | 1.0075   | 0.3155 |
| <b>act_l1_4_ti</b> | -0.00749 | 0.0128 | 0.3440   | 0.5575 |
| <b>act_l1_5</b>    | 0.0673   | 0.0221 | 9.2729   | 0.0023 |
| <b>act_l1_5_ti</b> | 0.0220   | 0.0287 | 0.5855   | 0.4442 |
| <b>can_l2</b>      | -0.0914  | 0.0291 | 9.8765   | 0.0017 |
| <b>can_l1</b>      | 0.1500   | 0.0254 | 34.7767  | <.0001 |
| <b>bmi_l2_1</b>    | 0.0747   | 0.0531 | 1.9846   | 0.1589 |
| <b>bmi_l1_1</b>    | 0.0489   | 0.0486 | 1.0123   | 0.3143 |
| <b>bmi_l2_2</b>    | 0.0458   | 0.0320 | 2.0496   | 0.1523 |
| <b>bmi_l1_2</b>    | 0.0315   | 0.0295 | 1.1440   | 0.2848 |
| <b>bmi_l2_3</b>    | 0.0523   | 0.0296 | 3.1126   | 0.0777 |
| <b>bmi_l1_3</b>    | 0.0133   | 0.0274 | 0.2378   | 0.6258 |
| <b>bmi_l2_4</b>    | 0.0358   | 0.0274 | 1.7105   | 0.1909 |
| <b>bmi_l1_4</b>    | 0.00991  | 0.0253 | 0.1529   | 0.6958 |
| <b>bmi_l2_5</b>    | 0.0405   | 0.0242 | 2.8090   | 0.0937 |
| <b>bmi_l1_5</b>    | -0.00777 | 0.0226 | 0.1186   | 0.7305 |
| <b>chl_l2</b>      | 0.00146  | 0.0138 | 0.0111   | 0.9159 |
| <b>chl_l1</b>      | 0.00291  | 0.0131 | 0.0491   | 0.8246 |
| <b>hbp_l2</b>      | -0.0492  | 0.0164 | 8.9687   | 0.0027 |
| <b>hbp_l1</b>      | 0.0155   | 0.0160 | 0.9386   | 0.3326 |
| <b>sta_l1</b>      | 0.0367   | 0.0128 | 8.1878   | 0.0042 |
| <b>sta_l1_ti</b>   | -0.00146 | 0.0162 | 0.0081   | 0.9283 |
| <b>asn_l2_1</b>    | -0.0274  | 0.0111 | 6.0557   | 0.0139 |
| <b>asn_l1_1</b>    | -0.1860  | 0.0108 | 297.9470 | <.0001 |
| <b>asn_l2_2</b>    | -0.0668  | 0.0106 | 39.6233  | <.0001 |
| <b>asn_l1_2</b>    | -0.0890  | 0.0104 | 73.6066  | <.0001 |
| <b>angcbg_l2</b>   | -0.0648  | 0.0403 | 2.5856   | 0.1078 |

|                     |         |         |          |        |
|---------------------|---------|---------|----------|--------|
| <b>angcbg_l1</b>    | -0.0480 | 0.0362  | 1.7558   | 0.1852 |
| <b>str_l2</b>       | -0.1495 | 0.0892  | 2.8088   | 0.0937 |
| <b>str_l1</b>       | 0.0476  | 0.0752  | 0.4007   | 0.5267 |
| <b>mi_l2</b>        | 0.0618  | 0.0923  | 0.4482   | 0.5032 |
| <b>mi_l1</b>        | -0.1878 | 0.0800  | 5.5052   | 0.0190 |
| <b>mnp</b>          | 0.00455 | 0.0151  | 0.0910   | 0.7629 |
| <b>pmh</b>          | 0.0405  | 0.00974 | 17.3226  | <.0001 |
| <b>ost</b>          | 0.1884  | 0.0183  | 105.9647 | <.0001 |
| <b>rpmeats_1</b>    | 0.0743  | 0.0179  | 17.3289  | <.0001 |
| <b>rpmeats_1_ti</b> | 0.4431  | 0.0210  | 446.6328 | <.0001 |
| <b>rpmeats_2</b>    | 0.0565  | 0.0156  | 13.0551  | 0.0003 |
| <b>rpmeats_2_ti</b> | 0.2631  | 0.0170  | 238.5452 | <.0001 |
| <b>rpmeats_3</b>    | 0.0253  | 0.0149  | 2.8840   | 0.0895 |
| <b>rpmeats_3_ti</b> | 0.1531  | 0.0163  | 88.1135  | <.0001 |
| <b>rpmeats_4</b>    | 0.0273  | 0.0140  | 3.8185   | 0.0507 |
| <b>rpmeats_4_ti</b> | 0.1030  | 0.0147  | 49.3499  | <.0001 |
| <b>coff_1</b>       | 0.0386  | 0.0222  | 3.0264   | 0.0819 |
| <b>coff_1_ti</b>    | 0.0634  | 0.0165  | 14.7143  | 0.0001 |
| <b>coff_2</b>       | 0.0405  | 0.0198  | 4.2115   | 0.0402 |
| <b>coff_2_ti</b>    | 0.1954  | 0.0218  | 80.4066  | <.0001 |
| <b>coff_3</b>       | 0.0609  | 0.0213  | 8.1681   | 0.0043 |
| <b>coff_3_ti</b>    | 0.2184  | 0.0259  | 71.1250  | <.0001 |
| <b>coff_4</b>       | 0.0107  | 0.0113  | 0.8928   | 0.3447 |
| <b>coff_4_ti</b>    | 0.0214  | 0.0115  | 3.4485   | 0.0633 |
| <b>whgrn_1</b>      | -0.0927 | 0.0163  | 32.3829  | <.0001 |
| <b>whgrn_1_ti</b>   | -0.5216 | 0.0174  | 903.0639 | <.0001 |
| <b>whgrn_2</b>      | -0.0660 | 0.0146  | 20.3302  | <.0001 |
| <b>whgrn_2_ti</b>   | -0.3485 | 0.0175  | 397.5459 | <.0001 |
| <b>whgrn_3</b>      | -0.0361 | 0.0138  | 6.8192   | 0.0090 |
| <b>whgrn_3_ti</b>   | -0.2663 | 0.0181  | 216.0583 | <.0001 |
| <b>whgrn_4</b>      | -0.0245 | 0.0132  | 3.4502   | 0.0632 |
| <b>whgrn_4_ti</b>   | -0.0594 | 0.0186  | 10.1601  | 0.0014 |



|                  |          |         |         |        |
|------------------|----------|---------|---------|--------|
| <b>soda_1</b>    | 0.0146   | 0.0203  | 0.5147  | 0.4731 |
| <b>soda_1_ti</b> | 0.0109   | 0.00943 | 1.3404  | 0.2470 |
| <b>soda_2</b>    | 0.0220   | 0.0169  | 1.6906  | 0.1935 |
| <b>soda_2_ti</b> | -0.0137  | 0.00780 | 3.0777  | 0.0794 |
| <b>soda_3</b>    | 0.0276   | 0.0161  | 2.9237  | 0.0873 |
| <b>soda_3_ti</b> | -0.0143  | 0.00789 | 3.2792  | 0.0702 |
| <b>soda_4</b>    | -0.0237  | 0.0154  | 2.3698  | 0.1237 |
| <b>soda_4_ti</b> | 0.00365  | 0.00815 | 0.2004  | 0.6544 |
| <b>cal_1</b>     | -0.0715  | 0.0183  | 15.2573 | <.0001 |
| <b>cal_1_ti</b>  | -0.0733  | 0.0186  | 15.4845 | <.0001 |
| <b>cal_2</b>     | -0.00186 | 0.0161  | 0.0134  | 0.9079 |
| <b>cal_2_ti</b>  | -0.0255  | 0.0172  | 2.1920  | 0.1387 |
| <b>cal_3</b>     | 0.00785  | 0.0148  | 0.2806  | 0.5963 |
| <b>cal_3_ti</b>  | -0.0326  | 0.0167  | 3.8414  | 0.0500 |
| <b>cal_4</b>     | 0.00249  | 0.0137  | 0.0331  | 0.8556 |
| <b>cal_4_ti</b>  | 0.00934  | 0.0163  | 0.3274  | 0.5672 |
| <b>alc_1</b>     | 0.0539   | 0.0189  | 8.1720  | 0.0043 |
| <b>alc_1_ti</b>  | -0.1196  | 0.0133  | 80.3412 | <.0001 |
| <b>alc_2</b>     | 0.0631   | 0.0171  | 13.5544 | 0.0002 |
| <b>alc_2_ti</b>  | -0.0706  | 0.0142  | 24.5721 | <.0001 |
| <b>alc_3</b>     | 0.0233   | 0.0173  | 1.8167  | 0.1777 |
| <b>alc_3_ti</b>  | -0.0129  | 0.0183  | 0.4980  | 0.4804 |
| <b>cig_1</b>     | -0.00525 | 0.0454  | 0.0134  | 0.9079 |
| <b>cig_2</b>     | -0.0286  | 0.0524  | 0.2994  | 0.5843 |
| <b>cig_3</b>     | -0.0174  | 0.0466  | 0.1395  | 0.7088 |
| <b>cig_4</b>     | 0.00589  | 0.0423  | 0.0194  | 0.8892 |

---

(U) Logistic model to estimate the probability of being physically active

| <b>Variable</b>      | <b>Log odds ratio</b> | <b>Standard error</b> | <b>Wald chi-square</b> | <b>P value</b> |
|----------------------|-----------------------|-----------------------|------------------------|----------------|
| <b>Intercept</b>     | 0.5955                | 0.1841                | 10.4686                | 0.0012         |
| <b>fhx</b>           | -0.00475              | 0.00824               | 0.3326                 | 0.5642         |
| <b>smkhx</b>         | 0.0234                | 0.00783               | 8.9130                 | 0.0028         |
| <b>ochx</b>          | 0.0206                | 0.00709               | 8.4217                 | 0.0037         |
| <b>employed_1</b>    | 0.1772                | 0.0132                | 181.0729               | <.0001         |
| <b>employed_2</b>    | 0.2283                | 0.0208                | 120.5235               | <.0001         |
| <b>employed_3</b>    | 0.1457                | 0.0105                | 192.2818               | <.0001         |
| <b>employed_4</b>    | 0.2153                | 0.0139                | 240.0612               | <.0001         |
| <b>employed_5</b>    | 0.1649                | 0.00977               | 285.0636               | <.0001         |
| <b>employed_6</b>    | 0.1620                | 0.0146                | 122.7646               | <.0001         |
| <b>employed_miss</b> | -0.0622               | 0.0467                | 1.7731                 | 0.1830         |
| <b>mar80</b>         | 0.0552                | 0.0124                | 19.7512                | <.0001         |
| <b>college</b>       | 0.1093                | 0.00759               | 207.1650               | <.0001         |
| <b>stress82</b>      | -0.00795              | 0.00786               | 1.0217                 | 0.3121         |
| <b>stress82_miss</b> | 0.0355                | 0.0433                | 0.6729                 | 0.4120         |
| <b>hhighsch</b>      | -0.0943               | 0.00906               | 108.4353               | <.0001         |
| <b>hcollege</b>      | -0.0574               | 0.00992               | 33.4725                | <.0001         |
| <b>hgradsch</b>      | -0.0154               | 0.0106                | 2.1158                 | 0.1458         |
| <b>lbmi18_2</b>      | 0.0528                | 0.00829               | 40.4844                | <.0001         |
| <b>lbmi18_3</b>      | 0.0538                | 0.0132                | 16.6841                | <.0001         |
| <b>lbmi18_4</b>      | -0.00828              | 0.0309                | 0.0717                 | 0.7888         |
| <b>baseage</b>       | 0.0116                | 0.00708               | 2.6893                 | 0.1010         |
| <b>baseage_sq</b>    | -0.00037              | 0.000070              | 27.8943                | <.0001         |
| <b>bmi80_1</b>       | 0.2316                | 0.0459                | 25.4158                | <.0001         |
| <b>bmi80_2</b>       | 0.2719                | 0.0304                | 79.9328                | <.0001         |
| <b>bmi80_3</b>       | 0.2162                | 0.0289                | 56.0660                | <.0001         |
| <b>bmi80_4</b>       | 0.1577                | 0.0274                | 33.1745                | <.0001         |
| <b>bmi80_5</b>       | 0.0751                | 0.0264                | 8.1256                 | 0.0044         |

|                    |          |         |           |        |
|--------------------|----------|---------|-----------|--------|
| <b>act80_1</b>     | -0.1996  | 0.00975 | 419.2462  | <.0001 |
| <b>act80_2</b>     | -0.0319  | 0.0115  | 7.7143    | 0.0055 |
| <b>act80_3</b>     | 0.00208  | 0.0104  | 0.0403    | 0.8409 |
| <b>alc80_1</b>     | -0.0227  | 0.0114  | 3.9449    | 0.0470 |
| <b>alc80_2</b>     | 0.0413   | 0.0109  | 14.2346   | 0.0002 |
| <b>alc80_3</b>     | 0.0369   | 0.0123  | 9.0399    | 0.0026 |
| <b>rpmeats80_1</b> | 0.0323   | 0.0196  | 2.7207    | 0.0991 |
| <b>rpmeats80_2</b> | 0.0299   | 0.0121  | 6.1383    | 0.0132 |
| <b>rpmeats80_3</b> | 0.00535  | 0.0101  | 0.2793    | 0.5972 |
| <b>rpmeats80_4</b> | -0.0146  | 0.00907 | 2.5923    | 0.1074 |
| <b>coff80_1</b>    | 0.0170   | 0.00974 | 3.0630    | 0.0801 |
| <b>coff80_2</b>    | 0.0337   | 0.0139  | 5.9098    | 0.0151 |
| <b>coff80_3</b>    | 0.0141   | 0.0215  | 0.4328    | 0.5106 |
| <b>whgrn80_1</b>   | -0.00792 | 0.00980 | 0.6535    | 0.4189 |
| <b>whgrn80_2</b>   | 0.0593   | 0.0105  | 32.0616   | <.0001 |
| <b>soda80_1</b>    | -0.0516  | 0.0124  | 17.2606   | <.0001 |
| <b>soda80_2</b>    | -0.00448 | 0.0109  | 0.1695    | 0.6806 |
| <b>soda80_3</b>    | 0.0205   | 0.0108  | 3.6146    | 0.0573 |
| <b>soda80_4</b>    | 0.0167   | 0.0103  | 2.6061    | 0.1065 |
| <b>cig80_1</b>     | 0.1564   | 0.0275  | 32.4135   | <.0001 |
| <b>cig80_2</b>     | 0.2215   | 0.0347  | 40.7015   | <.0001 |
| <b>cig80_3</b>     | 0.1707   | 0.0300  | 32.4361   | <.0001 |
| <b>cig80_4</b>     | 0.0649   | 0.0265  | 5.9924    | 0.0144 |
| <b>period_2</b>    | 0.1837   | 0.0528  | 12.1038   | 0.0005 |
| <b>period_3</b>    | 1.1489   | 0.0428  | 719.5124  | <.0001 |
| <b>period_5</b>    | -0.3354  | 0.0443  | 57.4638   | <.0001 |
| <b>period_6</b>    | 0.7401   | 0.0178  | 1720.9604 | <.0001 |
| <b>period_7</b>    | 0.4869   | 0.0393  | 153.3813  | <.0001 |
| <b>period_8</b>    | 0.5293   | 0.0169  | 985.8166  | <.0001 |
| <b>period_9</b>    | 0.2168   | 0.0395  | 30.1310   | <.0001 |
| <b>period_10</b>   | 0.3672   | 0.0162  | 511.7396  | <.0001 |
| <b>period_11</b>   | 0.5489   | 0.0393  | 194.5745  | <.0001 |

|                        |          |        |         |        |
|------------------------|----------|--------|---------|--------|
| <b>mnp_l2</b>          | 0.00664  | 0.0152 | 0.1911  | 0.6620 |
| <b>mnp_l1</b>          | 0.0489   | 0.0199 | 6.0234  | 0.0141 |
| <b>pmh_l2</b>          | 0.0297   | 0.0107 | 7.6713  | 0.0056 |
| <b>pmh_l1</b>          | -0.0124  | 0.0121 | 1.0614  | 0.3029 |
| <b>ost_l2</b>          | -0.0684  | 0.0212 | 10.4193 | 0.0012 |
| <b>ost_l1</b>          | 0.00225  | 0.0258 | 0.0076  | 0.9303 |
| <b>rpmeats_l1_1</b>    | 0.1906   | 0.0419 | 20.6716 | <.0001 |
| <b>rpmeats_l1_1_ti</b> | -0.0608  | 0.0225 | 7.3344  | 0.0068 |
| <b>rpmeats_l1_2</b>    | 0.1630   | 0.0315 | 26.7304 | <.0001 |
| <b>rpmeats_l1_2_ti</b> | -0.0514  | 0.0179 | 8.2094  | 0.0042 |
| <b>rpmeats_l1_3</b>    | 0.1216   | 0.0291 | 17.4482 | <.0001 |
| <b>rpmeats_l1_3_ti</b> | -0.0315  | 0.0170 | 3.4352  | 0.0638 |
| <b>rpmeats_l1_4</b>    | 0.0815   | 0.0245 | 11.0208 | 0.0009 |
| <b>rpmeats_l1_4_ti</b> | -0.0281  | 0.0152 | 3.4147  | 0.0646 |
| <b>coff_l1_1</b>       | 0.0682   | 0.0354 | 3.7111  | 0.0541 |
| <b>coff_l1_1_ti</b>    | -0.0118  | 0.0174 | 0.4574  | 0.4988 |
| <b>coff_l1_2</b>       | 0.0744   | 0.0422 | 3.1129  | 0.0777 |
| <b>coff_l1_2_ti</b>    | -0.0366  | 0.0227 | 2.6094  | 0.1062 |
| <b>coff_l1_3</b>       | 0.0392   | 0.0483 | 0.6606  | 0.4163 |
| <b>coff_l1_3_ti</b>    | -0.00247 | 0.0268 | 0.0085  | 0.9266 |
| <b>coff_l1_4</b>       | -0.0195  | 0.0217 | 0.8040  | 0.3699 |
| <b>coff_l1_4_ti</b>    | -0.00423 | 0.0122 | 0.1211  | 0.7279 |
| <b>whgrn_l1_1</b>      | -0.2710  | 0.0333 | 66.3513 | <.0001 |
| <b>whgrn_l1_1_ti</b>   | 0.0670   | 0.0184 | 13.3104 | 0.0003 |
| <b>whgrn_l1_2</b>      | -0.1940  | 0.0332 | 34.2135 | <.0001 |
| <b>whgrn_l1_2_ti</b>   | 0.0785   | 0.0183 | 18.3029 | <.0001 |
| <b>whgrn_l1_3</b>      | -0.1147  | 0.0346 | 11.0132 | 0.0009 |
| <b>whgrn_l1_3_ti</b>   | 0.0495   | 0.0190 | 6.7913  | 0.0092 |
| <b>whgrn_l1_4</b>      | -0.0504  | 0.0357 | 1.9980  | 0.1575 |
| <b>whgrn_l1_4_ti</b>   | 0.0201   | 0.0195 | 1.0620  | 0.3028 |
| <b>soda_l1_1</b>       | -0.0180  | 0.0322 | 0.3137  | 0.5754 |
| <b>soda_l1_1_ti</b>    | 0.00321  | 0.0133 | 0.0583  | 0.8091 |

|                     |          |         |            |        |
|---------------------|----------|---------|------------|--------|
| <b>soda_l1_2</b>    | 0.0194   | 0.0264  | 0.5394     | 0.4627 |
| <b>soda_l1_2_ti</b> | -0.00334 | 0.0110  | 0.0919     | 0.7618 |
| <b>soda_l1_3</b>    | -0.00415 | 0.0256  | 0.0263     | 0.8712 |
| <b>soda_l1_3_ti</b> | 0.00949  | 0.0112  | 0.7210     | 0.3958 |
| <b>soda_l1_4</b>    | 0.0141   | 0.0251  | 0.3151     | 0.5746 |
| <b>soda_l1_4_ti</b> | -0.00036 | 0.0115  | 0.0010     | 0.9749 |
| <b>cal_l1_1</b>     | 0.0901   | 0.0354  | 6.4641     | 0.0110 |
| <b>cal_l1_1_ti</b>  | -0.1145  | 0.0195  | 34.5912    | <.0001 |
| <b>cal_l1_2</b>     | 0.1115   | 0.0321  | 12.0346    | 0.0005 |
| <b>cal_l1_2_ti</b>  | -0.0935  | 0.0179  | 27.2614    | <.0001 |
| <b>cal_l1_3</b>     | 0.0329   | 0.0304  | 1.1722     | 0.2790 |
| <b>cal_l1_3_ti</b>  | -0.0591  | 0.0172  | 11.8470    | 0.0006 |
| <b>cal_l1_4</b>     | 0.0333   | 0.0291  | 1.3081     | 0.2527 |
| <b>cal_l1_4_ti</b>  | -0.0434  | 0.0167  | 6.7674     | 0.0093 |
| <b>alc_l1_1</b>     | -0.0617  | 0.0305  | 4.0806     | 0.0434 |
| <b>alc_l1_1_ti</b>  | 0.0608   | 0.0142  | 18.2763    | <.0001 |
| <b>alc_l1_2</b>     | -0.0103  | 0.0299  | 0.1180     | 0.7312 |
| <b>alc_l1_2_ti</b>  | 0.0382   | 0.0153  | 6.2811     | 0.0122 |
| <b>alc_l1_3</b>     | 0.0131   | 0.0346  | 0.1433     | 0.7050 |
| <b>alc_l1_3_ti</b>  | 0.0162   | 0.0194  | 0.6941     | 0.4048 |
| <b>cig_l2_1</b>     | 0.0815   | 0.0451  | 3.2562     | 0.0712 |
| <b>cig_l1_1</b>     | 0.1085   | 0.0505  | 4.6167     | 0.0317 |
| <b>cig_l2_2</b>     | 0.0804   | 0.0526  | 2.3402     | 0.1261 |
| <b>cig_l1_2</b>     | 0.0904   | 0.0576  | 2.4578     | 0.1169 |
| <b>cig_l2_3</b>     | 0.0609   | 0.0460  | 1.7469     | 0.1863 |
| <b>cig_l1_3</b>     | 0.0698   | 0.0505  | 1.9110     | 0.1668 |
| <b>cig_l2_4</b>     | 0.0451   | 0.0408  | 1.2167     | 0.2700 |
| <b>cig_l1_4</b>     | 0.0653   | 0.0446  | 2.1399     | 0.1435 |
| <b>mvi_l2</b>       | 0.0665   | 0.00806 | 67.9695    | <.0001 |
| <b>mvi_l1</b>       | 0.0414   | 0.00812 | 26.0388    | <.0001 |
| <b>act_l1_1</b>     | -2.8856  | 0.0145  | 39498.8601 | <.0001 |
| <b>act_l1_1_ti</b>  | 0.7946   | 0.0122  | 4228.7008  | <.0001 |

|                    |          |        |           |        |
|--------------------|----------|--------|-----------|--------|
| <b>act_l1_2</b>    | -0.9683  | 0.0161 | 3616.7520 | <.0001 |
| <b>act_l1_2_ti</b> | 0.2472   | 0.0142 | 304.3945  | <.0001 |
| <b>act_l1_3</b>    | -0.1705  | 0.0311 | 29.9875   | <.0001 |
| <b>act_l1_3_ti</b> | 0.2362   | 0.0318 | 55.2535   | <.0001 |
| <b>act_l1_4</b>    | -0.5598  | 0.0185 | 911.4037  | <.0001 |
| <b>act_l1_4_ti</b> | 0.0864   | 0.0151 | 32.8525   | <.0001 |
| <b>act_l1_5</b>    | 0.2525   | 0.0380 | 44.1964   | <.0001 |
| <b>act_l1_5_ti</b> | 0.1876   | 0.0402 | 21.7294   | <.0001 |
| <b>can_l2</b>      | 0.0422   | 0.0297 | 2.0141    | 0.1558 |
| <b>can_l1</b>      | -0.0658  | 0.0264 | 6.2226    | 0.0126 |
| <b>bmi_l2_1</b>    | 0.0107   | 0.0558 | 0.0367    | 0.8480 |
| <b>bmi_l1_1</b>    | 0.1010   | 0.0510 | 3.9189    | 0.0477 |
| <b>bmi_l2_2</b>    | 0.0269   | 0.0334 | 0.6451    | 0.4219 |
| <b>bmi_l1_2</b>    | 0.3530   | 0.0309 | 130.6013  | <.0001 |
| <b>bmi_l2_3</b>    | -0.0113  | 0.0307 | 0.1347    | 0.7136 |
| <b>bmi_l1_3</b>    | 0.3564   | 0.0285 | 156.8751  | <.0001 |
| <b>bmi_l2_4</b>    | -0.0396  | 0.0283 | 1.9593    | 0.1616 |
| <b>bmi_l1_4</b>    | 0.2807   | 0.0262 | 114.9873  | <.0001 |
| <b>bmi_l2_5</b>    | -0.00396 | 0.0249 | 0.0253    | 0.8737 |
| <b>bmi_l1_5</b>    | 0.1587   | 0.0233 | 46.5337   | <.0001 |
| <b>chl_l2</b>      | -0.0207  | 0.0153 | 1.8356    | 0.1755 |
| <b>chl_l1</b>      | 0.0273   | 0.0148 | 3.3944    | 0.0654 |
| <b>hbp_l2</b>      | -0.0228  | 0.0170 | 1.8043    | 0.1792 |
| <b>hbp_l1</b>      | -0.0593  | 0.0166 | 12.7420   | 0.0004 |
| <b>sta_l1</b>      | -0.0158  | 0.0125 | 1.5915    | 0.2071 |
| <b>sta_l1_ti</b>   | 0.00700  | 0.0165 | 0.1793    | 0.6719 |
| <b>asn_l2_1</b>    | 0.0512   | 0.0114 | 20.1112   | <.0001 |
| <b>asn_l1_1</b>    | -0.0159  | 0.0111 | 2.0480    | 0.1524 |
| <b>asn_l2_2</b>    | 0.0655   | 0.0110 | 35.5303   | <.0001 |
| <b>asn_l1_2</b>    | 0.0450   | 0.0108 | 17.2672   | <.0001 |
| <b>angcbg_l2</b>   | -0.1402  | 0.0423 | 10.9558   | 0.0009 |
| <b>angcbg_l1</b>   | 0.0662   | 0.0385 | 2.9536    | 0.0857 |

|                     |          |        |          |        |
|---------------------|----------|--------|----------|--------|
| <b>str_l2</b>       | -0.0123  | 0.0897 | 0.0188   | 0.8911 |
| <b>str_l1</b>       | -0.0953  | 0.0761 | 1.5676   | 0.2106 |
| <b>mi_l2</b>        | -0.0257  | 0.0957 | 0.0719   | 0.7886 |
| <b>mi_l1</b>        | -0.0394  | 0.0842 | 0.2187   | 0.6400 |
| <b>mnp</b>          | -0.0352  | 0.0171 | 4.2359   | 0.0396 |
| <b>pmh</b>          | 0.0253   | 0.0104 | 5.9347   | 0.0148 |
| <b>ost</b>          | -0.0242  | 0.0183 | 1.7488   | 0.1860 |
| <b>rpmeats_1</b>    | 0.1518   | 0.0203 | 55.7676  | <.0001 |
| <b>rpmeats_1_ti</b> | -0.0844  | 0.0222 | 14.4684  | 0.0001 |
| <b>rpmeats_2</b>    | 0.0917   | 0.0179 | 26.1829  | <.0001 |
| <b>rpmeats_2_ti</b> | -0.0627  | 0.0177 | 12.5124  | 0.0004 |
| <b>rpmeats_3</b>    | 0.0659   | 0.0172 | 14.7096  | 0.0001 |
| <b>rpmeats_3_ti</b> | -0.0466  | 0.0169 | 7.5909   | 0.0059 |
| <b>rpmeats_4</b>    | 0.0168   | 0.0161 | 1.0797   | 0.2988 |
| <b>rpmeats_4_ti</b> | -0.0299  | 0.0151 | 3.8926   | 0.0485 |
| <b>coff_1</b>       | -0.0938  | 0.0257 | 13.2975  | 0.0003 |
| <b>coff_1_ti</b>    | -0.0185  | 0.0170 | 1.1827   | 0.2768 |
| <b>coff_2</b>       | -0.0591  | 0.0223 | 7.0271   | 0.0080 |
| <b>coff_2_ti</b>    | -0.0228  | 0.0225 | 1.0267   | 0.3109 |
| <b>coff_3</b>       | 0.000105 | 0.0238 | 0.0000   | 0.9965 |
| <b>coff_3_ti</b>    | -0.0190  | 0.0270 | 0.4949   | 0.4817 |
| <b>coff_4</b>       | -0.0425  | 0.0132 | 10.3718  | 0.0013 |
| <b>coff_4_ti</b>    | -0.00097 | 0.0119 | 0.0066   | 0.9354 |
| <b>whgrn_1</b>      | -0.1913  | 0.0186 | 106.2737 | <.0001 |
| <b>whgrn_1_ti</b>   | 0.0879   | 0.0181 | 23.6056  | <.0001 |
| <b>whgrn_2</b>      | -0.1353  | 0.0167 | 65.3500  | <.0001 |
| <b>whgrn_2_ti</b>   | 0.0848   | 0.0183 | 21.4000  | <.0001 |
| <b>whgrn_3</b>      | -0.0821  | 0.0158 | 26.8624  | <.0001 |
| <b>whgrn_3_ti</b>   | 0.0407   | 0.0191 | 4.5173   | 0.0336 |
| <b>whgrn_4</b>      | -0.0183  | 0.0152 | 1.4465   | 0.2291 |
| <b>whgrn_4_ti</b>   | 0.0112   | 0.0198 | 0.3208   | 0.5712 |
| <b>soda_1</b>       | 0.0808   | 0.0239 | 11.3889  | 0.0007 |

|                  |          |         |          |        |
|------------------|----------|---------|----------|--------|
| <b>soda_1_ti</b> | -0.0152  | 0.0107  | 2.0076   | 0.1565 |
| <b>soda_2</b>    | 0.0915   | 0.0204  | 20.0964  | <.0001 |
| <b>soda_2_ti</b> | -0.0246  | 0.00883 | 7.7390   | 0.0054 |
| <b>soda_3</b>    | 0.0769   | 0.0196  | 15.3833  | <.0001 |
| <b>soda_3_ti</b> | -0.0134  | 0.00894 | 2.2488   | 0.1337 |
| <b>soda_4</b>    | 0.0422   | 0.0189  | 5.0066   | 0.0253 |
| <b>soda_4_ti</b> | -0.00031 | 0.00927 | 0.0011   | 0.9730 |
| <b>cal_1</b>     | -0.0102  | 0.0207  | 0.2424   | 0.6224 |
| <b>cal_1_ti</b>  | -0.0634  | 0.0191  | 11.0140  | 0.0009 |
| <b>cal_2</b>     | 0.00801  | 0.0183  | 0.1919   | 0.6613 |
| <b>cal_2_ti</b>  | -0.0592  | 0.0177  | 11.1229  | 0.0009 |
| <b>cal_3</b>     | 0.0104   | 0.0169  | 0.3805   | 0.5373 |
| <b>cal_3_ti</b>  | -0.0236  | 0.0172  | 1.8914   | 0.1690 |
| <b>cal_4</b>     | 0.00446  | 0.0156  | 0.0816   | 0.7751 |
| <b>cal_4_ti</b>  | -0.0171  | 0.0169  | 1.0308   | 0.3100 |
| <b>alc_1</b>     | -0.2625  | 0.0216  | 148.1399 | <.0001 |
| <b>alc_1_ti</b>  | 0.0769   | 0.0137  | 31.3240  | <.0001 |
| <b>alc_2</b>     | -0.1094  | 0.0197  | 30.7930  | <.0001 |
| <b>alc_2_ti</b>  | 0.0460   | 0.0149  | 9.5591   | 0.0020 |
| <b>alc_3</b>     | -0.0393  | 0.0199  | 3.8969   | 0.0484 |
| <b>alc_3_ti</b>  | 0.0197   | 0.0194  | 1.0240   | 0.3116 |
| <b>cig_1</b>     | 0.4550   | 0.0492  | 85.5336  | <.0001 |
| <b>cig_2</b>     | 0.3112   | 0.0568  | 29.9803  | <.0001 |
| <b>cig_3</b>     | 0.2182   | 0.0504  | 18.7149  | <.0001 |
| <b>cig_4</b>     | 0.1065   | 0.0458  | 5.4034   | 0.0201 |
| <b>mvi</b>       | 0.0149   | 0.00760 | 3.8490   | 0.0498 |

---



(V) Log-linear model to estimate the amount of physical activity in women who are physically active

| <b>Variable</b>      | <b>Parameter Estimate</b> | <b>Standard Error</b> | <b>t Value</b> | <b>P value</b> |
|----------------------|---------------------------|-----------------------|----------------|----------------|
| <b>Intercept</b>     | 0.19379                   | 0.11816               | 1.64           | 0.1010         |
| <b>fhx</b>           | 0.00472                   | 0.00534               | 0.88           | 0.3769         |
| <b>smkhx</b>         | 0.03659                   | 0.00487               | 7.51           | <.0001         |
| <b>ochx</b>          | -0.01351                  | 0.00453               | -2.98          | 0.0028         |
| <b>employed_1</b>    | 0.00689                   | 0.00834               | 0.83           | 0.4089         |
| <b>employed_2</b>    | -0.03355                  | 0.01320               | -2.54          | 0.0110         |
| <b>employed_3</b>    | -0.02977                  | 0.00688               | -4.32          | <.0001         |
| <b>employed_4</b>    | 0.00690                   | 0.00864               | 0.80           | 0.4244         |
| <b>employed_5</b>    | -0.00185                  | 0.00634               | -0.29          | 0.7697         |
| <b>employed_6</b>    | 0.00978                   | 0.00915               | 1.07           | 0.2853         |
| <b>employed_miss</b> | -0.05067                  | 0.02954               | -1.72          | 0.0863         |
| <b>mar80</b>         | 0.02630                   | 0.00801               | 3.28           | 0.0010         |
| <b>college</b>       | 0.00206                   | 0.00468               | 0.44           | 0.6606         |
| <b>stress82</b>      | -0.02248                  | 0.00498               | -4.51          | <.0001         |
| <b>stress82_miss</b> | 0.02138                   | 0.02739               | 0.78           | 0.4351         |
| <b>hhighsch</b>      | -0.01903                  | 0.00590               | -3.23          | 0.0013         |
| <b>hcollege</b>      | 0.02033                   | 0.00626               | 3.24           | 0.0012         |
| <b>hgradsch</b>      | 0.03626                   | 0.00653               | 5.55           | <.0001         |
| <b>lbmi18_2</b>      | 0.04363                   | 0.00534               | 8.17           | <.0001         |
| <b>lbmi18_3</b>      | 0.06754                   | 0.00883               | 7.65           | <.0001         |
| <b>lbmi18_4</b>      | 0.15136                   | 0.02210               | 6.85           | <.0001         |
| <b>baseage</b>       | 0.03067                   | 0.00451               | 6.80           | <.0001         |
| <b>baseage_sq</b>    | -0.00037065               | 0.00004482            | -8.27          | <.0001         |
| <b>bmi80_1</b>       | 0.10857                   | 0.03235               | 3.36           | 0.0008         |
| <b>bmi80_2</b>       | 0.09383                   | 0.02310               | 4.06           | <.0001         |
| <b>bmi80_3</b>       | 0.06306                   | 0.02227               | 2.83           | 0.0046         |
| <b>bmi80_4</b>       | 0.02909                   | 0.02141               | 1.36           | 0.1742         |
| <b>bmi80_5</b>       | -0.01334                  | 0.02080               | -0.64          | 0.5214         |

|                    |             |         |        |        |
|--------------------|-------------|---------|--------|--------|
| <b>act80_1</b>     | -0.22135    | 0.00621 | -35.63 | <.0001 |
| <b>act80_2</b>     | -0.17066    | 0.00701 | -24.35 | <.0001 |
| <b>act80_3</b>     | -0.08514    | 0.00611 | -13.94 | <.0001 |
| <b>alc80_1</b>     | -0.01050    | 0.00729 | -1.44  | 0.1502 |
| <b>alc80_2</b>     | -0.01094    | 0.00682 | -1.60  | 0.1088 |
| <b>alc80_3</b>     | -0.00643    | 0.00750 | -0.86  | 0.3911 |
| <b>rpmeats80_1</b> | 0.04903     | 0.01167 | 4.20   | <.0001 |
| <b>rpmeats80_2</b> | 0.05977     | 0.00744 | 8.03   | <.0001 |
| <b>rpmeats80_3</b> | 0.01484     | 0.00641 | 2.32   | 0.0205 |
| <b>rpmeats80_4</b> | 0.01928     | 0.00582 | 3.32   | 0.0009 |
| <b>coff80_1</b>    | -0.00076908 | 0.00623 | -0.12  | 0.9017 |
| <b>coff80_2</b>    | -0.03639    | 0.00874 | -4.16  | <.0001 |
| <b>coff80_3</b>    | -0.00744    | 0.01367 | -0.54  | 0.5864 |
| <b>whgrn80_1</b>   | 0.00079838  | 0.00619 | 0.13   | 0.8974 |
| <b>whgrn80_2</b>   | 0.01511     | 0.00650 | 2.32   | 0.0202 |
| <b>soda80_1</b>    | 0.01494     | 0.00802 | 1.86   | 0.0625 |
| <b>soda80_2</b>    | -0.02103    | 0.00707 | -2.97  | 0.0029 |
| <b>soda80_3</b>    | -0.01171    | 0.00696 | -1.68  | 0.0924 |
| <b>soda80_4</b>    | 0.01158     | 0.00670 | 1.73   | 0.0838 |
| <b>cig80_1</b>     | 0.01768     | 0.02055 | 0.86   | 0.3896 |
| <b>cig80_2</b>     | 0.02194     | 0.02425 | 0.90   | 0.3657 |
| <b>cig80_3</b>     | 0.03636     | 0.02208 | 1.65   | 0.0997 |
| <b>cig80_4</b>     | 0.02246     | 0.02014 | 1.12   | 0.2648 |
| <b>period_2</b>    | -0.26149    | 0.03104 | -8.42  | <.0001 |
| <b>period_3</b>    | 0.19485     | 0.02703 | 7.21   | <.0001 |
| <b>period_5</b>    | -0.21157    | 0.02689 | -7.87  | <.0001 |
| <b>period_6</b>    | 0.07170     | 0.01179 | 6.08   | <.0001 |
| <b>period_7</b>    | 0.02882     | 0.02545 | 1.13   | 0.2575 |
| <b>period_8</b>    | 0.07073     | 0.01136 | 6.22   | <.0001 |
| <b>period_9</b>    | 0.09261     | 0.02567 | 3.61   | 0.0003 |
| <b>period_10</b>   | -0.04380    | 0.01117 | -3.92  | <.0001 |
| <b>period_11</b>   | 0.16649     | 0.02547 | 6.54   | <.0001 |

|                        |            |         |       |        |
|------------------------|------------|---------|-------|--------|
| <b>mnp_l2</b>          | 0.02880    | 0.00938 | 3.07  | 0.0021 |
| <b>mnp_l1</b>          | 0.00437    | 0.01221 | 0.36  | 0.7205 |
| <b>pmh_l2</b>          | -0.00548   | 0.00685 | -0.80 | 0.4236 |
| <b>pmh_l1</b>          | -0.00709   | 0.00760 | -0.93 | 0.3509 |
| <b>ost_l2</b>          | 0.00184    | 0.01448 | 0.13  | 0.8989 |
| <b>ost_l1</b>          | 0.00536    | 0.01737 | 0.31  | 0.7577 |
| <b>rpmeats_l1_1</b>    | 0.15455    | 0.02404 | 6.43  | <.0001 |
| <b>rpmeats_l1_1_ti</b> | -0.04609   | 0.01313 | -3.51 | 0.0004 |
| <b>rpmeats_l1_2</b>    | 0.09847    | 0.01882 | 5.23  | <.0001 |
| <b>rpmeats_l1_2_ti</b> | -0.02754   | 0.01099 | -2.51 | 0.0122 |
| <b>rpmeats_l1_3</b>    | 0.08361    | 0.01766 | 4.73  | <.0001 |
| <b>rpmeats_l1_3_ti</b> | -0.01958   | 0.01061 | -1.85 | 0.0649 |
| <b>rpmeats_l1_4</b>    | 0.05275    | 0.01522 | 3.46  | 0.0005 |
| <b>rpmeats_l1_4_ti</b> | -0.01510   | 0.00976 | -1.55 | 0.1220 |
| <b>coff_l1_1</b>       | 0.00644    | 0.02173 | 0.30  | 0.7668 |
| <b>coff_l1_1_ti</b>    | 0.01190    | 0.01069 | 1.11  | 0.2656 |
| <b>coff_l1_2</b>       | 0.01144    | 0.02501 | 0.46  | 0.6473 |
| <b>coff_l1_2_ti</b>    | -0.00661   | 0.01364 | -0.48 | 0.6281 |
| <b>coff_l1_3</b>       | -0.02096   | 0.02817 | -0.74 | 0.4568 |
| <b>coff_l1_3_ti</b>    | -0.00182   | 0.01603 | -0.11 | 0.9097 |
| <b>coff_l1_4</b>       | 0.00303    | 0.01319 | 0.23  | 0.8181 |
| <b>coff_l1_4_ti</b>    | 0.00029251 | 0.00748 | 0.04  | 0.9688 |
| <b>whgrn_l1_1</b>      | -0.06199   | 0.01986 | -3.12 | 0.0018 |
| <b>whgrn_l1_1_ti</b>   | 0.02487    | 0.01128 | 2.21  | 0.0274 |
| <b>whgrn_l1_2</b>      | -0.03870   | 0.01923 | -2.01 | 0.0442 |
| <b>whgrn_l1_2_ti</b>   | 0.02194    | 0.01089 | 2.02  | 0.0438 |
| <b>whgrn_l1_3</b>      | -0.04403   | 0.01968 | -2.24 | 0.0252 |
| <b>whgrn_l1_3_ti</b>   | 0.02544    | 0.01102 | 2.31  | 0.0209 |
| <b>whgrn_l1_4</b>      | 0.00561    | 0.01987 | 0.28  | 0.7776 |
| <b>whgrn_l1_4_ti</b>   | 0.00623    | 0.01107 | 0.56  | 0.5735 |
| <b>soda_l1_1</b>       | -0.01575   | 0.02022 | -0.78 | 0.4360 |
| <b>soda_l1_1_ti</b>    | 0.00629    | 0.00814 | 0.77  | 0.4396 |

|                     |             |         |         |        |
|---------------------|-------------|---------|---------|--------|
| <b>soda_l1_2</b>    | -0.03554    | 0.01670 | -2.13   | 0.0333 |
| <b>soda_l1_2_ti</b> | 0.00880     | 0.00683 | 1.29    | 0.1973 |
| <b>soda_l1_3</b>    | -0.03051    | 0.01611 | -1.89   | 0.0583 |
| <b>soda_l1_3_ti</b> | 0.00540     | 0.00693 | 0.78    | 0.4358 |
| <b>soda_l1_4</b>    | 0.01308     | 0.01570 | 0.83    | 0.4049 |
| <b>soda_l1_4_ti</b> | -0.00550    | 0.00716 | -0.77   | 0.4422 |
| <b>cal_l1_1</b>     | 0.06586     | 0.02180 | 3.02    | 0.0025 |
| <b>cal_l1_1_ti</b>  | -0.01807    | 0.01211 | -1.49   | 0.1359 |
| <b>cal_l1_2</b>     | 0.05188     | 0.01957 | 2.65    | 0.0080 |
| <b>cal_l1_2_ti</b>  | -0.01432    | 0.01103 | -1.30   | 0.1942 |
| <b>cal_l1_3</b>     | 0.02842     | 0.01856 | 1.53    | 0.1257 |
| <b>cal_l1_3_ti</b>  | -0.00709    | 0.01059 | -0.67   | 0.5030 |
| <b>cal_l1_4</b>     | 0.03216     | 0.01767 | 1.82    | 0.0688 |
| <b>cal_l1_4_ti</b>  | -0.01742    | 0.01025 | -1.70   | 0.0893 |
| <b>alc_l1_1</b>     | -0.03070    | 0.01876 | -1.64   | 0.1017 |
| <b>alc_l1_1_ti</b>  | 0.02703     | 0.00872 | 3.10    | 0.0019 |
| <b>alc_l1_2</b>     | -0.01141    | 0.01772 | -0.64   | 0.5196 |
| <b>alc_l1_2_ti</b>  | 0.01336     | 0.00910 | 1.47    | 0.1421 |
| <b>alc_l1_3</b>     | -0.01132    | 0.01978 | -0.57   | 0.5670 |
| <b>alc_l1_3_ti</b>  | 0.01094     | 0.01124 | 0.97    | 0.3307 |
| <b>cig_l2_1</b>     | 0.02721     | 0.03352 | 0.81    | 0.4168 |
| <b>cig_l1_1</b>     | 0.06096     | 0.03806 | 1.60    | 0.1092 |
| <b>cig_l2_2</b>     | 0.05681     | 0.03770 | 1.51    | 0.1319 |
| <b>cig_l1_2</b>     | 0.04710     | 0.04207 | 1.12    | 0.2629 |
| <b>cig_l2_3</b>     | 0.06831     | 0.03435 | 1.99    | 0.0467 |
| <b>cig_l1_3</b>     | 0.05399     | 0.03833 | 1.41    | 0.1590 |
| <b>cig_l2_4</b>     | 0.03703     | 0.03116 | 1.19    | 0.2346 |
| <b>cig_l1_4</b>     | 0.04757     | 0.03463 | 1.37    | 0.1695 |
| <b>mvi_l2</b>       | -0.00021619 | 0.00505 | -0.04   | 0.9658 |
| <b>mvi_l1</b>       | 0.01077     | 0.00501 | 2.15    | 0.0316 |
| <b>act_l1_1</b>     | -1.86810    | 0.00699 | -267.23 | <.0001 |
| <b>act_l1_1_ti</b>  | 0.31773     | 0.00665 | 47.77   | <.0001 |

|                    |          |         |         |        |
|--------------------|----------|---------|---------|--------|
| <b>act_l1_2</b>    | -1.26685 | 0.00705 | -179.71 | <.0001 |
| <b>act_l1_2_ti</b> | 0.20730  | 0.00728 | 28.46   | <.0001 |
| <b>act_l1_3</b>    | -0.87208 | 0.01196 | -72.92  | <.0001 |
| <b>act_l1_3_ti</b> | 0.13368  | 0.01431 | 9.34    | <.0001 |
| <b>act_l1_4</b>    | -0.61735 | 0.00777 | -79.44  | <.0001 |
| <b>act_l1_4_ti</b> | 0.07923  | 0.00734 | 10.79   | <.0001 |
| <b>act_l1_5</b>    | -0.40737 | 0.01232 | -33.06  | <.0001 |
| <b>act_l1_5_ti</b> | 0.09225  | 0.01559 | 5.92    | <.0001 |
| <b>can_l2</b>      | -0.01423 | 0.02007 | -0.71   | 0.4782 |
| <b>can_l1</b>      | 0.00548  | 0.01781 | 0.31    | 0.7584 |
| <b>bmi_l2_1</b>    | -0.02360 | 0.03917 | -0.60   | 0.5468 |
| <b>bmi_l1_1</b>    | 0.29249  | 0.03611 | 8.10    | <.0001 |
| <b>bmi_l2_2</b>    | -0.00354 | 0.02423 | -0.15   | 0.8838 |
| <b>bmi_l1_2</b>    | 0.27280  | 0.02213 | 12.33   | <.0001 |
| <b>bmi_l2_3</b>    | -0.00923 | 0.02284 | -0.40   | 0.6860 |
| <b>bmi_l1_3</b>    | 0.24387  | 0.02088 | 11.68   | <.0001 |
| <b>bmi_l2_4</b>    | -0.01025 | 0.02150 | -0.48   | 0.6337 |
| <b>bmi_l1_4</b>    | 0.16846  | 0.01968 | 8.56    | <.0001 |
| <b>bmi_l2_5</b>    | -0.01021 | 0.01940 | -0.53   | 0.5985 |
| <b>bmi_l1_5</b>    | 0.07905  | 0.01792 | 4.41    | <.0001 |
| <b>chl_l2</b>      | -0.01802 | 0.00997 | -1.81   | 0.0707 |
| <b>chl_l1</b>      | 0.01033  | 0.00961 | 1.08    | 0.2821 |
| <b>hbp_l2</b>      | -0.00167 | 0.01134 | -0.15   | 0.8831 |
| <b>hbp_l1</b>      | -0.01229 | 0.01098 | -1.12   | 0.2628 |
| <b>sta_l1</b>      | -0.00638 | 0.00865 | -0.74   | 0.4608 |
| <b>sta_l1_ti</b>   | 0.01712  | 0.01051 | 1.63    | 0.1035 |
| <b>asn_l2_1</b>    | 0.00502  | 0.00753 | 0.67    | 0.5047 |
| <b>asn_l1_1</b>    | -0.01449 | 0.00733 | -1.98   | 0.0480 |
| <b>asn_l2_2</b>    | -0.01914 | 0.00719 | -2.66   | 0.0077 |
| <b>asn_l1_2</b>    | -0.02266 | 0.00702 | -3.23   | 0.0012 |
| <b>angcbg_l2</b>   | -0.04314 | 0.02904 | -1.49   | 0.1374 |
| <b>angcbg_l1</b>   | -0.02365 | 0.02601 | -0.91   | 0.3633 |

|                     |             |         |       |        |
|---------------------|-------------|---------|-------|--------|
| <b>str_l2</b>       | 0.08182     | 0.06834 | 1.20  | 0.2312 |
| <b>str_l1</b>       | -0.17921    | 0.05785 | -3.10 | 0.0019 |
| <b>mi_l2</b>        | -0.01323    | 0.06762 | -0.20 | 0.8449 |
| <b>mi_l1</b>        | 0.02580     | 0.05872 | 0.44  | 0.6603 |
| <b>mnp</b>          | 0.05726     | 0.01038 | 5.52  | <.0001 |
| <b>pmh</b>          | 0.02149     | 0.00650 | 3.31  | 0.0009 |
| <b>ost</b>          | -0.04972    | 0.01227 | -4.05 | <.0001 |
| <b>rpmeats_1</b>    | 0.16403     | 0.01318 | 12.44 | <.0001 |
| <b>rpmeats_1_ti</b> | -0.07296    | 0.01275 | -5.72 | <.0001 |
| <b>rpmeats_2</b>    | 0.12278     | 0.01175 | 10.45 | <.0001 |
| <b>rpmeats_2_ti</b> | -0.04136    | 0.01063 | -3.89 | 0.0001 |
| <b>rpmeats_3</b>    | 0.07871     | 0.01134 | 6.94  | <.0001 |
| <b>rpmeats_3_ti</b> | -0.03352    | 0.01035 | -3.24 | 0.0012 |
| <b>rpmeats_4</b>    | 0.05169     | 0.01077 | 4.80  | <.0001 |
| <b>rpmeats_4_ti</b> | -0.02440    | 0.00947 | -2.58 | 0.0100 |
| <b>coff_1</b>       | -0.02930    | 0.01661 | -1.76 | 0.0777 |
| <b>coff_1_ti</b>    | 0.01443     | 0.01036 | 1.39  | 0.1636 |
| <b>coff_2</b>       | -0.03818    | 0.01435 | -2.66 | 0.0078 |
| <b>coff_2_ti</b>    | 0.00397     | 0.01341 | 0.30  | 0.7675 |
| <b>coff_3</b>       | -0.04655    | 0.01520 | -3.06 | 0.0022 |
| <b>coff_3_ti</b>    | 0.01569     | 0.01590 | 0.99  | 0.3238 |
| <b>coff_4</b>       | -0.00054474 | 0.00827 | -0.07 | 0.9475 |
| <b>coff_4_ti</b>    | 0.00265     | 0.00726 | 0.36  | 0.7155 |
| <b>whgrn_1</b>      | -0.08046    | 0.01227 | -6.56 | <.0001 |
| <b>whgrn_1_ti</b>   | 0.01129     | 0.01090 | 1.04  | 0.3004 |
| <b>whgrn_2</b>      | -0.05807    | 0.01070 | -5.43 | <.0001 |
| <b>whgrn_2_ti</b>   | 0.01174     | 0.01075 | 1.09  | 0.2749 |
| <b>whgrn_3</b>      | -0.05215    | 0.00990 | -5.27 | <.0001 |
| <b>whgrn_3_ti</b>   | 0.02892     | 0.01101 | 2.63  | 0.0086 |
| <b>whgrn_4</b>      | -0.02282    | 0.00927 | -2.46 | 0.0139 |
| <b>whgrn_4_ti</b>   | -0.00606    | 0.01116 | -0.54 | 0.5873 |
| <b>soda_1</b>       | 0.05313     | 0.01580 | 3.36  | 0.0008 |

|                  |            |         |       |        |
|------------------|------------|---------|-------|--------|
| <b>soda_1_ti</b> | 0.00022693 | 0.00636 | 0.04  | 0.9716 |
| <b>soda_2</b>    | 0.03068    | 0.01350 | 2.27  | 0.0230 |
| <b>soda_2_ti</b> | 0.00497    | 0.00530 | 0.94  | 0.3480 |
| <b>soda_3</b>    | 0.03341    | 0.01299 | 2.57  | 0.0101 |
| <b>soda_3_ti</b> | -0.00307   | 0.00537 | -0.57 | 0.5672 |
| <b>soda_4</b>    | 0.01443    | 0.01253 | 1.15  | 0.2495 |
| <b>soda_4_ti</b> | -0.00532   | 0.00560 | -0.95 | 0.3416 |
| <b>cal_1</b>     | -0.12038   | 0.01339 | -8.99 | <.0001 |
| <b>cal_1_ti</b>  | 0.01188    | 0.01175 | 1.01  | 0.3118 |
| <b>cal_2</b>     | -0.07969   | 0.01169 | -6.82 | <.0001 |
| <b>cal_2_ti</b>  | 0.00678    | 0.01080 | 0.63  | 0.5302 |
| <b>cal_3</b>     | -0.05803   | 0.01071 | -5.42 | <.0001 |
| <b>cal_3_ti</b>  | 0.01843    | 0.01045 | 1.76  | 0.0779 |
| <b>cal_4</b>     | -0.02618   | 0.00985 | -2.66 | 0.0079 |
| <b>cal_4_ti</b>  | -0.00386   | 0.01024 | -0.38 | 0.7063 |
| <b>alc_1</b>     | -0.08495   | 0.01360 | -6.25 | <.0001 |
| <b>alc_1_ti</b>  | 0.01531    | 0.00834 | 1.84  | 0.0664 |
| <b>alc_2</b>     | -0.04076   | 0.01209 | -3.37 | 0.0007 |
| <b>alc_2_ti</b>  | 0.00291    | 0.00876 | 0.33  | 0.7401 |
| <b>alc_3</b>     | -0.01283   | 0.01188 | -1.08 | 0.2802 |
| <b>alc_3_ti</b>  | 0.00685    | 0.01111 | 0.62  | 0.5374 |
| <b>cig_1</b>     | 0.15800    | 0.03835 | 4.12  | <.0001 |
| <b>cig_2</b>     | 0.04486    | 0.04263 | 1.05  | 0.2926 |
| <b>cig_3</b>     | 0.02515    | 0.03930 | 0.64  | 0.5222 |
| <b>cig_4</b>     | -0.03254   | 0.03643 | -0.89 | 0.3717 |
| <b>mvi</b>       | 0.00244    | 0.00480 | 0.51  | 0.6108 |

---

(W) Logistic model to estimate the probability of incident cancer

| <b>Variable</b>      | <b>Log odds ratio</b> | <b>Standard error</b> | <b>Wald chi-square</b> | <b>P value</b> |
|----------------------|-----------------------|-----------------------|------------------------|----------------|
| <b>Intercept</b>     | -4.9128               | 0.5681                | 74.7841                | <.0001         |
| <b>fhx</b>           | 0.000259              | 0.0245                | 0.0001                 | 0.9916         |
| <b>smkhx</b>         | 0.1119                | 0.0232                | 23.1931                | <.0001         |
| <b>ochx</b>          | -0.0156               | 0.0211                | 0.5442                 | 0.4607         |
| <b>employed_1</b>    | 0.0778                | 0.0382                | 4.1381                 | 0.0419         |
| <b>employed_2</b>    | 0.0466                | 0.0633                | 0.5414                 | 0.4618         |
| <b>employed_3</b>    | 0.0157                | 0.0317                | 0.2448                 | 0.6208         |
| <b>employed_4</b>    | 0.0930                | 0.0407                | 5.2278                 | 0.0222         |
| <b>employed_5</b>    | 0.00687               | 0.0291                | 0.0559                 | 0.8131         |
| <b>employed_6</b>    | 0.0932                | 0.0420                | 4.9235                 | 0.0265         |
| <b>employed_miss</b> | -0.1236               | 0.1421                | 0.7563                 | 0.3845         |
| <b>mar80</b>         | 0.0128                | 0.0361                | 0.1247                 | 0.7240         |
| <b>college</b>       | 0.0486                | 0.0225                | 4.6652                 | 0.0308         |
| <b>stress82</b>      | 0.0179                | 0.0233                | 0.5886                 | 0.4430         |
| <b>stress82_miss</b> | -0.0498               | 0.1316                | 0.1431                 | 0.7052         |
| <b>hhighsch</b>      | -0.1241               | 0.0269                | 21.3441                | <.0001         |
| <b>hcollege</b>      | -0.0835               | 0.0292                | 8.1860                 | 0.0042         |
| <b>hgradsch</b>      | -0.1067               | 0.0312                | 11.6963                | 0.0006         |
| <b>lbmi18_2</b>      | -0.0486               | 0.0248                | 3.8498                 | 0.0498         |
| <b>lbmi18_3</b>      | -0.1515               | 0.0407                | 13.8496                | 0.0002         |
| <b>lbmi18_4</b>      | -0.2165               | 0.0970                | 4.9844                 | 0.0256         |
| <b>baseage</b>       | -0.00092              | 0.0217                | 0.0018                 | 0.9661         |
| <b>baseage_sq</b>    | 0.000307              | 0.000211              | 2.1177                 | 0.1456         |
| <b>bmi80_1</b>       | -0.1318               | 0.1374                | 0.9202                 | 0.3374         |
| <b>bmi80_2</b>       | -0.1105               | 0.0885                | 1.5596                 | 0.2117         |
| <b>bmi80_3</b>       | -0.1219               | 0.0841                | 2.1016                 | 0.1471         |
| <b>bmi80_4</b>       | -0.1440               | 0.0797                | 3.2645                 | 0.0708         |
| <b>bmi80_5</b>       | -0.1431               | 0.0770                | 3.4535                 | 0.0631         |
| <b>act80_1</b>       | 0.00312               | 0.0281                | 0.0124                 | 0.9115         |



|                    |          |        |         |        |
|--------------------|----------|--------|---------|--------|
| <b>act80_2</b>     | -0.0445  | 0.0334 | 1.7687  | 0.1835 |
| <b>act80_3</b>     | 0.0196   | 0.0291 | 0.4553  | 0.4998 |
| <b>alc80_1</b>     | -0.0909  | 0.0334 | 7.4202  | 0.0064 |
| <b>alc80_2</b>     | 0.00194  | 0.0316 | 0.0038  | 0.9511 |
| <b>alc80_3</b>     | 0.0163   | 0.0351 | 0.2155  | 0.6425 |
| <b>rpmeats80_1</b> | -0.0673  | 0.0559 | 1.4504  | 0.2285 |
| <b>rpmeats80_2</b> | 0.0130   | 0.0346 | 0.1409  | 0.7074 |
| <b>rpmeats80_3</b> | 0.0202   | 0.0298 | 0.4591  | 0.4980 |
| <b>rpmeats80_4</b> | -0.0347  | 0.0274 | 1.6024  | 0.2056 |
| <b>coff80_1</b>    | 0.0642   | 0.0284 | 5.1098  | 0.0238 |
| <b>coff80_2</b>    | -0.00185 | 0.0421 | 0.0019  | 0.9650 |
| <b>coff80_3</b>    | 0.1103   | 0.0618 | 3.1903  | 0.0741 |
| <b>whgrn80_1</b>   | 0.0205   | 0.0288 | 0.5104  | 0.4750 |
| <b>whgrn80_2</b>   | -0.0211  | 0.0306 | 0.4775  | 0.4896 |
| <b>soda80_1</b>    | 0.0264   | 0.0366 | 0.5181  | 0.4716 |
| <b>soda80_2</b>    | 0.00140  | 0.0329 | 0.0018  | 0.9660 |
| <b>soda80_3</b>    | -0.0160  | 0.0329 | 0.2365  | 0.6268 |
| <b>soda80_4</b>    | 0.0302   | 0.0314 | 0.9276  | 0.3355 |
| <b>cig80_1</b>     | -0.3533  | 0.0720 | 24.0766 | <.0001 |
| <b>cig80_2</b>     | -0.2719  | 0.0937 | 8.4250  | 0.0037 |
| <b>cig80_3</b>     | -0.4100  | 0.0810 | 25.6185 | <.0001 |
| <b>cig80_4</b>     | -0.2190  | 0.0693 | 9.9843  | 0.0016 |
| <b>period_2</b>    | -0.4587  | 0.1688 | 7.3842  | 0.0066 |
| <b>period_3</b>    | -0.1736  | 0.1274 | 1.8591  | 0.1727 |
| <b>period_4</b>    | -0.1860  | 0.1033 | 3.2457  | 0.0716 |
| <b>period_5</b>    | -0.1348  | 0.1240 | 1.1820  | 0.2770 |
| <b>period_6</b>    | -0.1631  | 0.0521 | 9.8012  | 0.0017 |
| <b>period_7</b>    | -0.0323  | 0.1096 | 0.0868  | 0.7683 |
| <b>period_8</b>    | 0.0796   | 0.0474 | 2.8198  | 0.0931 |
| <b>period_9</b>    | 0.1275   | 0.1093 | 1.3596  | 0.2436 |
| <b>period_10</b>   | 0.00244  | 0.0447 | 0.0030  | 0.9564 |
| <b>period_11</b>   | -0.2757  | 0.1094 | 6.3449  | 0.0118 |

|                        |         |        |          |        |
|------------------------|---------|--------|----------|--------|
| <b>mnp_l2</b>          | -0.1258 | 0.0482 | 6.8206   | 0.0090 |
| <b>mnp_l1</b>          | -0.6308 | 0.0582 | 117.3874 | <.0001 |
| <b>pmh_l2</b>          | 0.3077  | 0.0312 | 97.5912  | <.0001 |
| <b>pmh_l1</b>          | 0.9536  | 0.0322 | 876.9201 | <.0001 |
| <b>ost_l2</b>          | -0.0141 | 0.0594 | 0.0560   | 0.8130 |
| <b>ost_l1</b>          | -0.0483 | 0.0720 | 0.4501   | 0.5023 |
| <b>rpmeats_l1_1</b>    | 0.0373  | 0.1492 | 0.0626   | 0.8025 |
| <b>rpmeats_l1_1_ti</b> | -0.0650 | 0.0771 | 0.7112   | 0.3990 |
| <b>rpmeats_l1_2</b>    | -0.0810 | 0.1208 | 0.4503   | 0.5022 |
| <b>rpmeats_l1_2_ti</b> | -0.0133 | 0.0641 | 0.0430   | 0.8358 |
| <b>rpmeats_l1_3</b>    | 0.0480  | 0.1111 | 0.1869   | 0.6656 |
| <b>rpmeats_l1_3_ti</b> | -0.0462 | 0.0599 | 0.5956   | 0.4403 |
| <b>rpmeats_l1_4</b>    | -0.0491 | 0.0973 | 0.2550   | 0.6136 |
| <b>rpmeats_l1_4_ti</b> | 0.0130  | 0.0537 | 0.0588   | 0.8084 |
| <b>coff_l1_1</b>       | -0.0982 | 0.1246 | 0.6208   | 0.4308 |
| <b>coff_l1_1_ti</b>    | -0.0772 | 0.0614 | 1.5802   | 0.2087 |
| <b>coff_l1_2</b>       | -0.2555 | 0.1653 | 2.3900   | 0.1221 |
| <b>coff_l1_2_ti</b>    | 0.0302  | 0.0852 | 0.1255   | 0.7231 |
| <b>coff_l1_3</b>       | 0.0709  | 0.1734 | 0.1672   | 0.6826 |
| <b>coff_l1_3_ti</b>    | -0.0489 | 0.0917 | 0.2838   | 0.5942 |
| <b>coff_l1_4</b>       | -0.0534 | 0.0833 | 0.4112   | 0.5214 |
| <b>coff_l1_4_ti</b>    | 0.00962 | 0.0438 | 0.0482   | 0.8263 |
| <b>whgrn_l1_1</b>      | 0.0263  | 0.1234 | 0.0454   | 0.8313 |
| <b>whgrn_l1_1_ti</b>   | -0.0238 | 0.0647 | 0.1348   | 0.7135 |
| <b>whgrn_l1_2</b>      | 0.0559  | 0.1227 | 0.2078   | 0.6485 |
| <b>whgrn_l1_2_ti</b>   | -0.0302 | 0.0645 | 0.2195   | 0.6395 |
| <b>whgrn_l1_3</b>      | 0.0252  | 0.1275 | 0.0389   | 0.8436 |
| <b>whgrn_l1_3_ti</b>   | -0.0280 | 0.0669 | 0.1749   | 0.6758 |
| <b>whgrn_l1_4</b>      | 0.0299  | 0.1299 | 0.0529   | 0.8182 |
| <b>whgrn_l1_4_ti</b>   | -0.0593 | 0.0682 | 0.7553   | 0.3848 |
| <b>soda_l1_1</b>       | 0.1276  | 0.0935 | 1.8631   | 0.1723 |
| <b>soda_l1_1_ti</b>    | -0.0156 | 0.0332 | 0.2192   | 0.6396 |

|                     |          |        |         |        |
|---------------------|----------|--------|---------|--------|
| <b>soda_l1_2</b>    | 0.0987   | 0.0785 | 1.5806  | 0.2087 |
| <b>soda_l1_2_ti</b> | -0.00324 | 0.0278 | 0.0135  | 0.9074 |
| <b>soda_l1_3</b>    | 0.1715   | 0.0791 | 4.7026  | 0.0301 |
| <b>soda_l1_3_ti</b> | -0.0762  | 0.0293 | 6.7726  | 0.0093 |
| <b>soda_l1_4</b>    | 0.1008   | 0.0775 | 1.6931  | 0.1932 |
| <b>soda_l1_4_ti</b> | -0.0263  | 0.0294 | 0.8016  | 0.3706 |
| <b>cal_l1_1</b>     | -0.1076  | 0.1337 | 0.6479  | 0.4209 |
| <b>cal_l1_1_ti</b>  | 0.1311   | 0.0698 | 3.5275  | 0.0604 |
| <b>cal_l1_2</b>     | -0.1208  | 0.1219 | 0.9809  | 0.3220 |
| <b>cal_l1_2_ti</b>  | 0.0990   | 0.0643 | 2.3697  | 0.1237 |
| <b>cal_l1_3</b>     | -0.0945  | 0.1151 | 0.6734  | 0.4119 |
| <b>cal_l1_3_ti</b>  | 0.0864   | 0.0612 | 1.9948  | 0.1578 |
| <b>cal_l1_4</b>     | -0.0651  | 0.1102 | 0.3489  | 0.5548 |
| <b>cal_l1_4_ti</b>  | 0.0661   | 0.0591 | 1.2517  | 0.2632 |
| <b>alc_l1_1</b>     | -0.3380  | 0.1056 | 10.2354 | 0.0014 |
| <b>alc_l1_1_ti</b>  | -0.0510  | 0.0500 | 1.0381  | 0.3083 |
| <b>alc_l1_2</b>     | -0.3443  | 0.1076 | 10.2284 | 0.0014 |
| <b>alc_l1_2_ti</b>  | 0.0383   | 0.0539 | 0.5057  | 0.4770 |
| <b>alc_l1_3</b>     | -0.0588  | 0.1235 | 0.2268  | 0.6339 |
| <b>alc_l1_3_ti</b>  | -0.0714  | 0.0655 | 1.1879  | 0.2757 |
| <b>cig_l2_1</b>     | -0.0958  | 0.1321 | 0.5256  | 0.4685 |
| <b>cig_l1_1</b>     | -0.9483  | 0.1438 | 43.4942 | <.0001 |
| <b>cig_l2_2</b>     | -0.0861  | 0.1560 | 0.3044  | 0.5811 |
| <b>cig_l1_2</b>     | -0.5103  | 0.1669 | 9.3430  | 0.0022 |
| <b>cig_l2_3</b>     | 0.0752   | 0.1358 | 0.3069  | 0.5796 |
| <b>cig_l1_3</b>     | -0.4195  | 0.1478 | 8.0538  | 0.0045 |
| <b>cig_l2_4</b>     | 0.1476   | 0.1205 | 1.4990  | 0.2208 |
| <b>cig_l1_4</b>     | -0.1785  | 0.1313 | 1.8476  | 0.1741 |
| <b>mvi_l2</b>       | 0.0252   | 0.0228 | 1.2181  | 0.2697 |
| <b>mvi_l1</b>       | -0.0637  | 0.0246 | 6.7116  | 0.0096 |
| <b>act_l1_1</b>     | -0.1841  | 0.0409 | 20.2433 | <.0001 |
| <b>act_l1_1_ti</b>  | 0.0122   | 0.0373 | 0.1071  | 0.7434 |

|                    |          |        |         |        |
|--------------------|----------|--------|---------|--------|
| <b>act_l1_2</b>    | -0.1433  | 0.0445 | 10.3834 | 0.0013 |
| <b>act_l1_2_ti</b> | 0.00892  | 0.0447 | 0.0398  | 0.8418 |
| <b>act_l1_3</b>    | -0.1007  | 0.0764 | 1.7368  | 0.1875 |
| <b>act_l1_3_ti</b> | -0.0245  | 0.0929 | 0.0695  | 0.7920 |
| <b>act_l1_4</b>    | -0.0838  | 0.0483 | 3.0146  | 0.0825 |
| <b>act_l1_4_ti</b> | -0.00957 | 0.0460 | 0.0432  | 0.8353 |
| <b>act_l1_5</b>    | -0.1317  | 0.0806 | 2.6717  | 0.1021 |
| <b>act_l1_5_ti</b> | 0.0810   | 0.0978 | 0.6851  | 0.4078 |
| <b>bmi_l2_1</b>    | -0.5268  | 0.1706 | 9.5347  | 0.0020 |
| <b>bmi_l1_1</b>    | 0.2430   | 0.1477 | 2.7068  | 0.0999 |
| <b>bmi_l2_2</b>    | -0.1380  | 0.0997 | 1.9160  | 0.1663 |
| <b>bmi_l1_2</b>    | 0.0458   | 0.0944 | 0.2355  | 0.6275 |
| <b>bmi_l2_3</b>    | -0.1955  | 0.0920 | 4.5159  | 0.0336 |
| <b>bmi_l1_3</b>    | 0.1182   | 0.0872 | 1.8377  | 0.1752 |
| <b>bmi_l2_4</b>    | -0.1710  | 0.0847 | 4.0718  | 0.0436 |
| <b>bmi_l1_4</b>    | 0.1141   | 0.0805 | 2.0127  | 0.1560 |
| <b>bmi_l2_5</b>    | -0.0783  | 0.0744 | 1.1053  | 0.2931 |
| <b>bmi_l1_5</b>    | 0.1077   | 0.0713 | 2.2804  | 0.1310 |
| <b>chl_l2</b>      | 0.0561   | 0.0453 | 1.5334  | 0.2156 |
| <b>chl_l1</b>      | -0.0660  | 0.0440 | 2.2580  | 0.1329 |
| <b>hbp_l2</b>      | 0.0317   | 0.0496 | 0.4100  | 0.5220 |
| <b>hbp_l1</b>      | 0.0195   | 0.0487 | 0.1606  | 0.6886 |
| <b>sta_l1</b>      | -0.00373 | 0.0348 | 0.0115  | 0.9145 |
| <b>sta_l1_ti</b>   | 0.0816   | 0.0454 | 3.2397  | 0.0719 |
| <b>asn_l2_1</b>    | -0.0186  | 0.0330 | 0.3172  | 0.5733 |
| <b>asn_l1_1</b>    | 0.00622  | 0.0319 | 0.0380  | 0.8455 |
| <b>asn_l2_2</b>    | -0.00564 | 0.0315 | 0.0319  | 0.8582 |
| <b>asn_l1_2</b>    | -0.0205  | 0.0311 | 0.4339  | 0.5101 |
| <b>angcbg_l2</b>   | 0.0670   | 0.1168 | 0.3288  | 0.5664 |
| <b>angcbg_l1</b>   | 0.0182   | 0.1072 | 0.0287  | 0.8655 |
| <b>str_l2</b>      | -0.1981  | 0.2404 | 0.6793  | 0.4098 |
| <b>str_l1</b>      | 0.00894  | 0.1975 | 0.0020  | 0.9639 |

|                     |          |        |           |        |
|---------------------|----------|--------|-----------|--------|
| <b>mi_l2</b>        | 0.1187   | 0.2842 | 0.1745    | 0.6761 |
| <b>mi_l1</b>        | -0.3456  | 0.2535 | 1.8589    | 0.1727 |
| <b>mnp</b>          | 1.1070   | 0.0517 | 458.8676  | <.0001 |
| <b>pmh</b>          | -1.7185  | 0.0307 | 3131.5949 | <.0001 |
| <b>ost</b>          | 0.0552   | 0.0509 | 1.1743    | 0.2785 |
| <b>rpmeats_1</b>    | 0.0441   | 0.0575 | 0.5874    | 0.4434 |
| <b>rpmeats_1_ti</b> | -0.0159  | 0.0783 | 0.0410    | 0.8395 |
| <b>rpmeats_2</b>    | 0.0451   | 0.0517 | 0.7604    | 0.3832 |
| <b>rpmeats_2_ti</b> | 0.0426   | 0.0658 | 0.4193    | 0.5173 |
| <b>rpmeats_3</b>    | -0.00733 | 0.0502 | 0.0214    | 0.8837 |
| <b>rpmeats_3_ti</b> | 0.0129   | 0.0622 | 0.0432    | 0.8353 |
| <b>rpmeats_4</b>    | 0.00414  | 0.0479 | 0.0075    | 0.9310 |
| <b>rpmeats_4_ti</b> | 0.0408   | 0.0566 | 0.5202    | 0.4707 |
| <b>coff_1</b>       | 0.3738   | 0.0699 | 28.5837   | <.0001 |
| <b>coff_1_ti</b>    | -0.0958  | 0.0621 | 2.3777    | 0.1231 |
| <b>coff_2</b>       | 0.3809   | 0.0602 | 40.0134   | <.0001 |
| <b>coff_2_ti</b>    | -0.0676  | 0.0865 | 0.6110    | 0.4344 |
| <b>coff_3</b>       | 0.1120   | 0.0677 | 2.7365    | 0.0981 |
| <b>coff_3_ti</b>    | -0.0587  | 0.0945 | 0.3860    | 0.5344 |
| <b>coff_4</b>       | 0.1007   | 0.0382 | 6.9335    | 0.0085 |
| <b>coff_4_ti</b>    | 0.00197  | 0.0448 | 0.0019    | 0.9650 |
| <b>whgrn_1</b>      | -0.0880  | 0.0532 | 2.7389    | 0.0979 |
| <b>whgrn_1_ti</b>   | -0.0211  | 0.0661 | 0.1018    | 0.7497 |
| <b>whgrn_2</b>      | -0.0236  | 0.0468 | 0.2552    | 0.6134 |
| <b>whgrn_2_ti</b>   | -0.0404  | 0.0660 | 0.3735    | 0.5411 |
| <b>whgrn_3</b>      | -0.0229  | 0.0440 | 0.2705    | 0.6030 |
| <b>whgrn_3_ti</b>   | -0.0103  | 0.0685 | 0.0227    | 0.8803 |
| <b>whgrn_4</b>      | 0.0296   | 0.0410 | 0.5209    | 0.4704 |
| <b>whgrn_4_ti</b>   | -0.0441  | 0.0697 | 0.3999    | 0.5271 |
| <b>soda_1</b>       | -0.0460  | 0.0630 | 0.5347    | 0.4646 |
| <b>soda_1_ti</b>    | -0.0459  | 0.0339 | 1.8279    | 0.1764 |
| <b>soda_2</b>       | 0.0460   | 0.0538 | 0.7303    | 0.3928 |

|                  |         |        |         |        |
|------------------|---------|--------|---------|--------|
| <b>soda_2_ti</b> | -0.0648 | 0.0286 | 5.1545  | 0.0232 |
| <b>soda_3</b>    | 0.0746  | 0.0518 | 2.0749  | 0.1497 |
| <b>soda_3_ti</b> | -0.0987 | 0.0303 | 10.5904 | 0.0011 |
| <b>soda_4</b>    | 0.0104  | 0.0505 | 0.0424  | 0.8369 |
| <b>soda_4_ti</b> | -0.0488 | 0.0305 | 2.5666  | 0.1091 |
| <b>cal_1</b>     | -0.1443 | 0.0583 | 6.1278  | 0.0133 |
| <b>cal_1_ti</b>  | 0.1158  | 0.0708 | 2.6705  | 0.1022 |
| <b>cal_2</b>     | -0.1115 | 0.0516 | 4.6709  | 0.0307 |
| <b>cal_2_ti</b>  | 0.0978  | 0.0656 | 2.2217  | 0.1361 |
| <b>cal_3</b>     | -0.0873 | 0.0476 | 3.3643  | 0.0666 |
| <b>cal_3_ti</b>  | 0.0899  | 0.0628 | 2.0511  | 0.1521 |
| <b>cal_4</b>     | -0.0634 | 0.0442 | 2.0628  | 0.1509 |
| <b>cal_4_ti</b>  | 0.0558  | 0.0611 | 0.8356  | 0.3607 |
| <b>alc_1</b>     | 0.4351  | 0.0592 | 54.0689 | <.0001 |
| <b>alc_1_ti</b>  | -0.0540 | 0.0506 | 1.1386  | 0.2860 |
| <b>alc_2</b>     | 0.2942  | 0.0543 | 29.3801 | <.0001 |
| <b>alc_2_ti</b>  | 0.0118  | 0.0550 | 0.0463  | 0.8296 |
| <b>alc_3</b>     | 0.1438  | 0.0558 | 6.6464  | 0.0099 |
| <b>alc_3_ti</b>  | -0.0309 | 0.0675 | 0.2091  | 0.6475 |
| <b>cig_1</b>     | 1.4126  | 0.1510 | 87.4855 | <.0001 |
| <b>cig_2</b>     | 0.7148  | 0.1783 | 16.0814 | <.0001 |
| <b>cig_3</b>     | 0.3414  | 0.1616 | 4.4608  | 0.0347 |
| <b>cig_4</b>     | 0.0167  | 0.1503 | 0.0123  | 0.9117 |
| <b>mvi</b>       | 0.1247  | 0.0237 | 27.6136 | <.0001 |
| <b>act_1</b>     | 0.2863  | 0.0391 | 53.5006 | <.0001 |
| <b>act_1_ti</b>  | -0.0436 | 0.0504 | 0.7499  | 0.3865 |
| <b>act_2</b>     | 0.1324  | 0.0423 | 9.8072  | 0.0017 |
| <b>act_2_ti</b>  | 0.0313  | 0.0588 | 0.2834  | 0.5945 |
| <b>act_3</b>     | 0.00287 | 0.0750 | 0.0015  | 0.9695 |
| <b>act_3_ti</b>  | -0.0874 | 0.1162 | 0.5660  | 0.4519 |
| <b>act_4</b>     | 0.0822  | 0.0459 | 3.2056  | 0.0734 |
| <b>act_4_ti</b>  | 0.0224  | 0.0695 | 0.1043  | 0.7467 |

|                 |         |        |        |        |
|-----------------|---------|--------|--------|--------|
| <b>act_5</b>    | 0.0906  | 0.0741 | 1.4957 | 0.2213 |
| <b>act_5_ti</b> | -0.0570 | 0.1188 | 0.2298 | 0.6316 |

---

(X) Log-linear model to estimate body mass index (BMI)

| <b>Variable</b>      | <b>Parameter estimate</b> | <b>Standard error</b> | <b>t value</b> | <b>P value</b> |
|----------------------|---------------------------|-----------------------|----------------|----------------|
| <b>Intercept</b>     | 3.6582                    | 0.0047                | 777.71         | <.0001         |
| <b>flx</b>           | 0.0010                    | 0.0002                | 4.76           | <.0001         |
| <b>smkhx</b>         | 0.0012                    | 0.0002                | 5.94           | <.0001         |
| <b>ochx</b>          | 0.0007                    | 0.0002                | 3.90           | <.0001         |
| <b>employed_1</b>    | 0.0007                    | 0.0003                | 1.95           | 0.0516         |
| <b>employed_2</b>    | 0.0011                    | 0.0005                | 2.14           | 0.0327         |
| <b>employed_3</b>    | -0.0002                   | 0.0003                | -0.59          | 0.5549         |
| <b>employed_4</b>    | 0.0010                    | 0.0004                | 2.78           | 0.0055         |
| <b>employed_5</b>    | 0.0006                    | 0.0003                | 2.23           | 0.0259         |
| <b>employed_6</b>    | 0.0010                    | 0.0004                | 2.81           | 0.0050         |
| <b>employed_miss</b> | 0.0034                    | 0.0012                | 2.82           | 0.0049         |
| <b>mar80</b>         | -0.0034                   | 0.0003                | -10.79         | <.0001         |
| <b>college</b>       | -0.0001                   | 0.0002                | -0.68          | 0.4970         |
| <b>stress82</b>      | 0.0008                    | 0.0002                | 3.74           | 0.0002         |
| <b>stress82_miss</b> | -0.0013                   | 0.0011                | -1.20          | 0.2305         |
| <b>hhighsch</b>      | 0.0002                    | 0.0002                | 1.01           | 0.3117         |
| <b>hcollege</b>      | -0.0003                   | 0.0003                | -1.16          | 0.2458         |
| <b>hgradsch</b>      | -0.0004                   | 0.0003                | -1.40          | 0.1611         |
| <b>lbmi18_2</b>      | 0.0020                    | 0.0002                | 9.28           | <.0001         |
| <b>lbmi18_3</b>      | 0.0027                    | 0.0003                | 7.80           | <.0001         |
| <b>lbmi18_4</b>      | 0.0118                    | 0.0008                | 14.67          | <.0001         |
| <b>baseage</b>       | 0.0004                    | 0.0002                | 2.05           | 0.0408         |
| <b>baseage_sq</b>    | 0.0000                    | 0.0000                | -10.50         | <.0001         |
| <b>bmi80_1</b>       | -0.1204                   | 0.0012                | -101.29        | <.0001         |
| <b>bmi80_2</b>       | -0.0848                   | 0.0008                | -106.16        | <.0001         |
| <b>bmi80_3</b>       | -0.0687                   | 0.0008                | -90.29         | <.0001         |
| <b>bmi80_4</b>       | -0.0474                   | 0.0007                | -65.58         | <.0001         |
| <b>bmi80_5</b>       | -0.0317                   | 0.0007                | -45.60         | <.0001         |



|                    |         |        |        |        |
|--------------------|---------|--------|--------|--------|
| <b>act80_1</b>     | -0.0007 | 0.0002 | -2.69  | 0.0071 |
| <b>act80_2</b>     | -0.0007 | 0.0003 | -2.26  | 0.0238 |
| <b>act80_3</b>     | -0.0006 | 0.0003 | -2.30  | 0.0216 |
| <b>alc80_1</b>     | 0.0021  | 0.0003 | 7.26   | <.0001 |
| <b>alc80_2</b>     | 0.0022  | 0.0003 | 7.95   | <.0001 |
| <b>alc80_3</b>     | 0.0017  | 0.0003 | 5.42   | <.0001 |
| <b>rpmeats80_1</b> | 0.0025  | 0.0005 | 5.16   | <.0001 |
| <b>rpmeats80_2</b> | 0.0008  | 0.0003 | 2.68   | 0.0073 |
| <b>rpmeats80_3</b> | 0.0003  | 0.0003 | 0.97   | 0.3318 |
| <b>rpmeats80_4</b> | 0.0004  | 0.0002 | 1.55   | 0.1212 |
| <b>coff80_1</b>    | 0.0011  | 0.0002 | 4.53   | <.0001 |
| <b>coff80_2</b>    | 0.0006  | 0.0004 | 1.56   | 0.1188 |
| <b>coff80_3</b>    | 0.0003  | 0.0006 | 0.59   | 0.5519 |
| <b>whgrn80_1</b>   | 0.0011  | 0.0003 | 4.35   | <.0001 |
| <b>whgrn80_2</b>   | 0.0011  | 0.0003 | 4.06   | <.0001 |
| <b>soda80_1</b>    | -0.0022 | 0.0003 | -6.85  | <.0001 |
| <b>soda80_2</b>    | -0.0020 | 0.0003 | -7.11  | <.0001 |
| <b>soda80_3</b>    | -0.0011 | 0.0003 | -3.96  | <.0001 |
| <b>soda80_4</b>    | -0.0004 | 0.0003 | -1.64  | 0.1019 |
| <b>cig80_1</b>     | -0.0080 | 0.0007 | -11.21 | <.0001 |
| <b>cig80_2</b>     | -0.0046 | 0.0009 | -5.17  | <.0001 |
| <b>cig80_3</b>     | 0.0012  | 0.0008 | 1.60   | 0.1090 |
| <b>cig80_4</b>     | 0.0006  | 0.0007 | 0.82   | 0.4096 |
| <b>period_2</b>    | 0.0135  | 0.0013 | 10.26  | <.0001 |
| <b>period_3</b>    | 0.0071  | 0.0011 | 6.60   | <.0001 |
| <b>period_4</b>    | 0.0156  | 0.0008 | 18.51  | <.0001 |
| <b>period_5</b>    | 0.0147  | 0.0011 | 13.89  | <.0001 |
| <b>period_6</b>    | 0.0187  | 0.0005 | 40.37  | <.0001 |
| <b>period_7</b>    | 0.0088  | 0.0009 | 9.24   | <.0001 |
| <b>period_8</b>    | 0.0116  | 0.0004 | 26.17  | <.0001 |
| <b>period_9</b>    | 0.0070  | 0.0010 | 7.34   | <.0001 |
| <b>period_10</b>   | 0.0052  | 0.0004 | 12.19  | <.0001 |

|                        |         |        |       |        |
|------------------------|---------|--------|-------|--------|
| <b>period_11</b>       | -0.0070 | 0.0010 | -7.38 | <.0001 |
| <b>mnp_12</b>          | -0.0005 | 0.0004 | -1.32 | 0.1882 |
| <b>mnp_11</b>          | 0.0007  | 0.0005 | 1.41  | 0.1579 |
| <b>pmh_12</b>          | 0.0009  | 0.0003 | 3.35  | 0.0008 |
| <b>pmh_11</b>          | -0.0002 | 0.0003 | -0.52 | 0.6060 |
| <b>ost_12</b>          | -0.0016 | 0.0006 | -2.87 | 0.0041 |
| <b>ost_11</b>          | 0.0017  | 0.0007 | 2.51  | 0.0120 |
| <b>rpmeats_11_1</b>    | 0.0082  | 0.0011 | 7.35  | <.0001 |
| <b>rpmeats_11_1_ti</b> | -0.0019 | 0.0006 | -3.22 | 0.0013 |
| <b>rpmeats_11_2</b>    | 0.0045  | 0.0009 | 5.27  | <.0001 |
| <b>rpmeats_11_2_ti</b> | -0.0009 | 0.0005 | -1.87 | 0.0609 |
| <b>rpmeats_11_3</b>    | 0.0028  | 0.0008 | 3.44  | 0.0006 |
| <b>rpmeats_11_3_ti</b> | -0.0006 | 0.0004 | -1.38 | 0.1684 |
| <b>rpmeats_11_4</b>    | 0.0001  | 0.0007 | 0.10  | 0.9211 |
| <b>rpmeats_11_4_ti</b> | 0.0003  | 0.0004 | 0.79  | 0.4268 |
| <b>coff_11_1</b>       | -0.0036 | 0.0009 | -3.78 | 0.0002 |
| <b>coff_11_1_ti</b>    | 0.0017  | 0.0005 | 3.72  | 0.0002 |
| <b>coff_11_2</b>       | -0.0036 | 0.0012 | -3.10 | 0.0020 |
| <b>coff_11_2_ti</b>    | 0.0018  | 0.0006 | 3.03  | 0.0025 |
| <b>coff_11_3</b>       | -0.0003 | 0.0013 | -0.26 | 0.7956 |
| <b>coff_11_3_ti</b>    | -0.0002 | 0.0007 | -0.26 | 0.7922 |
| <b>coff_11_4</b>       | -0.0019 | 0.0006 | -3.16 | 0.0016 |
| <b>coff_11_4_ti</b>    | 0.0002  | 0.0003 | 0.74  | 0.4613 |
| <b>whgrn_11_1</b>      | -0.0044 | 0.0009 | -4.85 | <.0001 |
| <b>whgrn_11_1_ti</b>   | 0.0001  | 0.0005 | 0.18  | 0.8602 |
| <b>whgrn_11_2</b>      | -0.0030 | 0.0009 | -3.30 | 0.0010 |
| <b>whgrn_11_2_ti</b>   | -0.0002 | 0.0005 | -0.32 | 0.7515 |
| <b>whgrn_11_3</b>      | -0.0024 | 0.0009 | -2.59 | 0.0095 |
| <b>whgrn_11_3_ti</b>   | 0.0001  | 0.0005 | 0.24  | 0.8105 |
| <b>whgrn_11_4</b>      | -0.0010 | 0.0009 | -1.07 | 0.2845 |
| <b>whgrn_11_4_ti</b>   | 0.0000  | 0.0005 | -0.06 | 0.9521 |
| <b>soda_11_1</b>       | -0.0025 | 0.0008 | -3.16 | 0.0016 |

|                     |         |        |        |        |
|---------------------|---------|--------|--------|--------|
| <b>soda_l1_1_ti</b> | 0.0006  | 0.0003 | 2.23   | 0.0256 |
| <b>soda_l1_2</b>    | -0.0016 | 0.0007 | -2.42  | 0.0154 |
| <b>soda_l1_2_ti</b> | 0.0004  | 0.0002 | 1.60   | 0.1101 |
| <b>soda_l1_3</b>    | -0.0010 | 0.0006 | -1.59  | 0.1127 |
| <b>soda_l1_3_ti</b> | 0.0002  | 0.0002 | 0.91   | 0.3627 |
| <b>soda_l1_4</b>    | -0.0008 | 0.0006 | -1.26  | 0.2062 |
| <b>soda_l1_4_ti</b> | -0.0001 | 0.0002 | -0.22  | 0.8248 |
| <b>cal_l1_1</b>     | 0.0064  | 0.0010 | 6.49   | <.0001 |
| <b>cal_l1_1_ti</b>  | -0.0005 | 0.0005 | -0.97  | 0.3324 |
| <b>cal_l1_2</b>     | 0.0048  | 0.0009 | 5.37   | <.0001 |
| <b>cal_l1_2_ti</b>  | -0.0006 | 0.0005 | -1.27  | 0.2054 |
| <b>cal_l1_3</b>     | 0.0042  | 0.0008 | 4.92   | <.0001 |
| <b>cal_l1_3_ti</b>  | -0.0009 | 0.0005 | -2.01  | 0.0440 |
| <b>cal_l1_4</b>     | 0.0028  | 0.0008 | 3.43   | 0.0006 |
| <b>cal_l1_4_ti</b>  | -0.0010 | 0.0004 | -2.22  | 0.0261 |
| <b>alc_l1_1</b>     | 0.0033  | 0.0008 | 4.02   | <.0001 |
| <b>alc_l1_1_ti</b>  | 0.0017  | 0.0004 | 4.45   | <.0001 |
| <b>alc_l1_2</b>     | 0.0021  | 0.0008 | 2.59   | 0.0096 |
| <b>alc_l1_2_ti</b>  | 0.0021  | 0.0004 | 5.14   | <.0001 |
| <b>alc_l1_3</b>     | 0.0007  | 0.0009 | 0.71   | 0.4791 |
| <b>alc_l1_3_ti</b>  | 0.0016  | 0.0005 | 3.19   | 0.0014 |
| <b>cig_l2_1</b>     | -0.0163 | 0.0012 | -14.07 | <.0001 |
| <b>cig_l1_1</b>     | -0.0108 | 0.0013 | -8.16  | <.0001 |
| <b>cig_l2_2</b>     | -0.0122 | 0.0014 | -9.06  | <.0001 |
| <b>cig_l1_2</b>     | -0.0085 | 0.0015 | -5.70  | <.0001 |
| <b>cig_l2_3</b>     | -0.0070 | 0.0012 | -5.90  | <.0001 |
| <b>cig_l1_3</b>     | -0.0061 | 0.0013 | -4.62  | <.0001 |
| <b>cig_l2_4</b>     | -0.0027 | 0.0011 | -2.61  | 0.0091 |
| <b>cig_l1_4</b>     | -0.0028 | 0.0012 | -2.38  | 0.0172 |
| <b>mvi_l2</b>       | 0.0007  | 0.0002 | 3.52   | 0.0004 |
| <b>mvi_l1</b>       | 0.0005  | 0.0002 | 2.25   | 0.0244 |
| <b>act_l1_1</b>     | -0.0053 | 0.0004 | -14.67 | <.0001 |

|                    |         |        |         |        |
|--------------------|---------|--------|---------|--------|
| <b>act_l1_1_ti</b> | 0.0002  | 0.0003 | 0.74    | 0.4599 |
| <b>act_l1_2</b>    | -0.0034 | 0.0004 | -8.87   | <.0001 |
| <b>act_l1_2_ti</b> | -0.0002 | 0.0004 | -0.52   | 0.6059 |
| <b>act_l1_3</b>    | -0.0028 | 0.0006 | -4.30   | <.0001 |
| <b>act_l1_3_ti</b> | 0.0004  | 0.0007 | 0.52    | 0.6021 |
| <b>act_l1_4</b>    | -0.0015 | 0.0004 | -3.53   | 0.0004 |
| <b>act_l1_4_ti</b> | -0.0003 | 0.0004 | -0.96   | 0.3381 |
| <b>act_l1_5</b>    | -0.0002 | 0.0007 | -0.28   | 0.7788 |
| <b>act_l1_5_ti</b> | -0.0011 | 0.0008 | -1.30   | 0.1924 |
| <b>can_l2</b>      | -0.0039 | 0.0008 | -5.02   | <.0001 |
| <b>can_l1</b>      | 0.0131  | 0.0009 | 14.35   | <.0001 |
| <b>bmi_l2_1</b>    | -0.2341 | 0.0015 | -161.60 | <.0001 |
| <b>bmi_l1_1</b>    | -0.4707 | 0.0013 | -353.51 | <.0001 |
| <b>bmi_l2_2</b>    | -0.1786 | 0.0009 | -203.22 | <.0001 |
| <b>bmi_l1_2</b>    | -0.3487 | 0.0008 | -428.01 | <.0001 |
| <b>bmi_l2_3</b>    | -0.1420 | 0.0008 | -174.35 | <.0001 |
| <b>bmi_l1_3</b>    | -0.2675 | 0.0008 | -353.44 | <.0001 |
| <b>bmi_l2_4</b>    | -0.0993 | 0.0008 | -131.72 | <.0001 |
| <b>bmi_l1_4</b>    | -0.1880 | 0.0007 | -268.19 | <.0001 |
| <b>bmi_l2_5</b>    | -0.0510 | 0.0007 | -76.71  | <.0001 |
| <b>bmi_l1_5</b>    | -0.0901 | 0.0006 | -144.27 | <.0001 |
| <b>chl_l2</b>      | 0.0014  | 0.0004 | 3.74    | 0.0002 |
| <b>chl_l1</b>      | -0.0003 | 0.0004 | -0.70   | 0.4848 |
| <b>hbp_l2</b>      | -0.0008 | 0.0004 | -1.78   | 0.0751 |
| <b>hbp_l1</b>      | 0.0033  | 0.0004 | 7.66    | <.0001 |
| <b>sta_l1</b>      | 0.0039  | 0.0003 | 11.74   | <.0001 |
| <b>sta_l1_ti</b>   | -0.0001 | 0.0004 | -0.24   | 0.8094 |
| <b>asn_l2_1</b>    | 0.0016  | 0.0003 | 5.25    | <.0001 |
| <b>asn_l1_1</b>    | 0.0000  | 0.0003 | 0.12    | 0.9054 |
| <b>asn_l2_2</b>    | 0.0010  | 0.0003 | 3.50    | 0.0005 |
| <b>asn_l1_2</b>    | 0.0002  | 0.0003 | 0.69    | 0.4895 |
| <b>angcbg_l2</b>   | -0.0038 | 0.0011 | -3.43   | 0.0006 |

|                     |         |        |        |        |
|---------------------|---------|--------|--------|--------|
| <b>angcbg_l1</b>    | 0.0021  | 0.0010 | 2.06   | 0.0395 |
| <b>str_l2</b>       | -0.0010 | 0.0024 | -0.43  | 0.6702 |
| <b>str_l1</b>       | -0.0008 | 0.0020 | -0.41  | 0.6814 |
| <b>mi_l2</b>        | 0.0028  | 0.0025 | 1.11   | 0.2687 |
| <b>mi_l1</b>        | -0.0049 | 0.0022 | -2.22  | 0.0262 |
| <b>mnp</b>          | 0.0037  | 0.0004 | 8.58   | <.0001 |
| <b>pmh</b>          | -0.0014 | 0.0003 | -5.41  | <.0001 |
| <b>ost</b>          | -0.0049 | 0.0005 | -10.15 | <.0001 |
| <b>rpmeats_1</b>    | -0.0131 | 0.0005 | -26.53 | <.0001 |
| <b>rpmeats_1_ti</b> | 0.0003  | 0.0006 | 0.57   | 0.5654 |
| <b>rpmeats_2</b>    | -0.0074 | 0.0004 | -16.92 | <.0001 |
| <b>rpmeats_2_ti</b> | 0.0004  | 0.0005 | 0.80   | 0.4249 |
| <b>rpmeats_3</b>    | -0.0042 | 0.0004 | -10.00 | <.0001 |
| <b>rpmeats_3_ti</b> | 0.0002  | 0.0005 | 0.49   | 0.6243 |
| <b>rpmeats_4</b>    | -0.0024 | 0.0004 | -6.09  | <.0001 |
| <b>rpmeats_4_ti</b> | 0.0010  | 0.0004 | 2.45   | 0.0142 |
| <b>coff_1</b>       | -0.0021 | 0.0006 | -3.39  | 0.0007 |
| <b>coff_1_ti</b>    | 0.0013  | 0.0005 | 2.71   | 0.0067 |
| <b>coff_2</b>       | -0.0015 | 0.0005 | -2.72  | 0.0065 |
| <b>coff_2_ti</b>    | 0.0017  | 0.0006 | 2.74   | 0.0061 |
| <b>coff_3</b>       | 0.0003  | 0.0006 | 0.50   | 0.6150 |
| <b>coff_3_ti</b>    | -0.0005 | 0.0007 | -0.65  | 0.5162 |
| <b>coff_4</b>       | 0.0010  | 0.0003 | 3.31   | 0.0009 |
| <b>coff_4_ti</b>    | -0.0001 | 0.0003 | -0.33  | 0.7415 |
| <b>whgrn_1</b>      | 0.0009  | 0.0005 | 2.00   | 0.0453 |
| <b>whgrn_1_ti</b>   | 0.0005  | 0.0005 | 1.00   | 0.3157 |
| <b>whgrn_2</b>      | 0.0026  | 0.0004 | 6.40   | <.0001 |
| <b>whgrn_2_ti</b>   | -0.0004 | 0.0005 | -0.90  | 0.3706 |
| <b>whgrn_3</b>      | 0.0026  | 0.0004 | 6.90   | <.0001 |
| <b>whgrn_3_ti</b>   | 0.0000  | 0.0005 | 0.09   | 0.9300 |
| <b>whgrn_4</b>      | 0.0020  | 0.0004 | 5.47   | <.0001 |
| <b>whgrn_4_ti</b>   | -0.0003 | 0.0005 | -0.55  | 0.5857 |

|                  |         |        |        |        |
|------------------|---------|--------|--------|--------|
| <b>soda_1</b>    | -0.0074 | 0.0006 | -13.28 | <.0001 |
| <b>soda_1_ti</b> | 0.0018  | 0.0003 | 6.54   | <.0001 |
| <b>soda_2</b>    | -0.0049 | 0.0005 | -10.48 | <.0001 |
| <b>soda_2_ti</b> | 0.0010  | 0.0002 | 4.36   | <.0001 |
| <b>soda_3</b>    | -0.0029 | 0.0004 | -6.44  | <.0001 |
| <b>soda_3_ti</b> | 0.0005  | 0.0002 | 2.03   | 0.0425 |
| <b>soda_4</b>    | -0.0016 | 0.0004 | -3.75  | 0.0002 |
| <b>soda_4_ti</b> | 0.0003  | 0.0002 | 1.39   | 0.1635 |
| <b>cal_1</b>     | -0.0018 | 0.0005 | -3.59  | 0.0003 |
| <b>cal_1_ti</b>  | -0.0007 | 0.0005 | -1.26  | 0.2092 |
| <b>cal_2</b>     | -0.0017 | 0.0004 | -3.81  | 0.0001 |
| <b>cal_2_ti</b>  | -0.0008 | 0.0005 | -1.67  | 0.0941 |
| <b>cal_3</b>     | -0.0014 | 0.0004 | -3.44  | 0.0006 |
| <b>cal_3_ti</b>  | -0.0009 | 0.0005 | -1.96  | 0.0498 |
| <b>cal_4</b>     | -0.0010 | 0.0004 | -2.68  | 0.0073 |
| <b>cal_4_ti</b>  | -0.0010 | 0.0005 | -2.15  | 0.0317 |
| <b>alc_1</b>     | -0.0057 | 0.0005 | -10.99 | <.0001 |
| <b>alc_1_ti</b>  | 0.0019  | 0.0004 | 5.10   | <.0001 |
| <b>alc_2</b>     | -0.0031 | 0.0005 | -6.61  | <.0001 |
| <b>alc_2_ti</b>  | 0.0019  | 0.0004 | 4.74   | <.0001 |
| <b>alc_3</b>     | -0.0021 | 0.0005 | -4.36  | <.0001 |
| <b>alc_3_ti</b>  | 0.0013  | 0.0005 | 2.48   | 0.0132 |
| <b>cig_1</b>     | 0.0436  | 0.0013 | 33.75  | <.0001 |
| <b>cig_2</b>     | 0.0247  | 0.0015 | 16.69  | <.0001 |
| <b>cig_3</b>     | 0.0095  | 0.0013 | 7.14   | <.0001 |
| <b>cig_4</b>     | 0.0018  | 0.0012 | 1.46   | 0.1456 |
| <b>mvi</b>       | -0.0022 | 0.0002 | -11.43 | <.0001 |
| <b>act_1</b>     | 0.0128  | 0.0003 | 39.58  | <.0001 |
| <b>act_1_ti</b>  | -0.0033 | 0.0004 | -8.08  | <.0001 |
| <b>act_2</b>     | 0.0106  | 0.0003 | 30.66  | <.0001 |
| <b>act_2_ti</b>  | -0.0030 | 0.0005 | -6.38  | <.0001 |
| <b>act_3</b>     | 0.0082  | 0.0006 | 14.14  | <.0001 |

|                 |         |        |        |        |
|-----------------|---------|--------|--------|--------|
| <b>act_3_ti</b> | -0.0021 | 0.0008 | -2.53  | 0.0115 |
| <b>act_4</b>    | 0.0056  | 0.0004 | 14.99  | <.0001 |
| <b>act_4_ti</b> | -0.0005 | 0.0006 | -0.98  | 0.3268 |
| <b>act_5</b>    | 0.0045  | 0.0006 | 7.49   | <.0001 |
| <b>act_5_ti</b> | -0.0020 | 0.0009 | -2.22  | 0.0264 |
| <b>can</b>      | -0.0114 | 0.0006 | -18.36 | <.0001 |

(Y) Logistic model to estimate the probability of incident high serum cholesterol

| <b>Variable</b>      | <b>Log odds ratio</b> | <b>Standard error</b> | <b>Wald chi-square</b> | <b>P value</b> |
|----------------------|-----------------------|-----------------------|------------------------|----------------|
| <b>Intercept</b>     | -5.6020               | 0.3235                | 299.9054               | <.0001         |
| <b>fhx</b>           | 0.0690                | 0.0142                | 23.6488                | <.0001         |
| <b>smkhx</b>         | 0.0273                | 0.0135                | 4.0883                 | 0.0432         |
| <b>ochx</b>          | -0.00020              | 0.0123                | 0.0003                 | 0.9870         |
| <b>employed_1</b>    | 0.0146                | 0.0229                | 0.4066                 | 0.5237         |
| <b>employed_2</b>    | -0.0298               | 0.0361                | 0.6804                 | 0.4094         |
| <b>employed_3</b>    | 0.00796               | 0.0184                | 0.1882                 | 0.6644         |
| <b>employed_4</b>    | 0.0136                | 0.0239                | 0.3246                 | 0.5689         |
| <b>employed_5</b>    | 0.0360                | 0.0170                | 4.4590                 | 0.0347         |
| <b>employed_6</b>    | -0.0324               | 0.0254                | 1.6187                 | 0.2033         |
| <b>employed_miss</b> | 0.0892                | 0.0814                | 1.2005                 | 0.2732         |
| <b>mar80</b>         | 0.00246               | 0.0216                | 0.0129                 | 0.9094         |
| <b>college</b>       | -0.0614               | 0.0132                | 21.6805                | <.0001         |
| <b>stress82</b>      | 0.0975                | 0.0137                | 50.5951                | <.0001         |
| <b>stress82_miss</b> | -0.0124               | 0.0756                | 0.0267                 | 0.8702         |
| <b>hhighsch</b>      | 0.1121                | 0.0158                | 50.4324                | <.0001         |
| <b>hcollege</b>      | 0.0964                | 0.0172                | 31.3343                | <.0001         |
| <b>hgradsch</b>      | 0.0632                | 0.0184                | 11.8162                | 0.0006         |
| <b>lbmi18_2</b>      | -0.1303               | 0.0144                | 82.1332                | <.0001         |
| <b>lbmi18_3</b>      | -0.2180               | 0.0230                | 90.0860                | <.0001         |
| <b>lbmi18_4</b>      | -0.3275               | 0.0552                | 35.2348                | <.0001         |

|                    |          |          |         |        |
|--------------------|----------|----------|---------|--------|
| <b>baseage</b>     | 0.0982   | 0.0125   | 61.9380 | <.0001 |
| <b>baseage_sq</b>  | -0.00094 | 0.000123 | 57.8843 | <.0001 |
| <b>bmi80_1</b>     | 0.3962   | 0.0862   | 21.1084 | <.0001 |
| <b>bmi80_2</b>     | 0.3092   | 0.0561   | 30.3163 | <.0001 |
| <b>bmi80_3</b>     | 0.2437   | 0.0534   | 20.8309 | <.0001 |
| <b>bmi80_4</b>     | 0.1624   | 0.0508   | 10.2348 | 0.0014 |
| <b>bmi80_5</b>     | 0.1155   | 0.0481   | 5.7646  | 0.0164 |
| <b>act80_1</b>     | 0.0886   | 0.0166   | 28.4630 | <.0001 |
| <b>act80_2</b>     | 0.0695   | 0.0193   | 12.9273 | 0.0003 |
| <b>act80_3</b>     | 0.0354   | 0.0171   | 4.2573  | 0.0391 |
| <b>alc80_1</b>     | -0.00902 | 0.0204   | 0.1962  | 0.6578 |
| <b>alc80_2</b>     | 0.0100   | 0.0192   | 0.2730  | 0.6013 |
| <b>alc80_3</b>     | -0.0291  | 0.0212   | 1.8940  | 0.1688 |
| <b>rpmeats80_1</b> | -0.1052  | 0.0346   | 9.2459  | 0.0024 |
| <b>rpmeats80_2</b> | -0.0254  | 0.0209   | 1.4765  | 0.2243 |
| <b>rpmeats80_3</b> | -0.0322  | 0.0176   | 3.3496  | 0.0672 |
| <b>rpmeats80_4</b> | 0.00670  | 0.0157   | 0.1816  | 0.6700 |
| <b>coff80_1</b>    | 0.0329   | 0.0170   | 3.7415  | 0.0531 |
| <b>coff80_2</b>    | 0.0366   | 0.0240   | 2.3243  | 0.1274 |
| <b>coff80_3</b>    | 0.0511   | 0.0368   | 1.9324  | 0.1645 |
| <b>whgrn80_1</b>   | 0.0204   | 0.0170   | 1.4404  | 0.2301 |
| <b>whgrn80_2</b>   | -0.00558 | 0.0181   | 0.0950  | 0.7579 |
| <b>soda80_1</b>    | -0.1051  | 0.0222   | 22.4144 | <.0001 |
| <b>soda80_2</b>    | -0.0411  | 0.0192   | 4.5689  | 0.0326 |
| <b>soda80_3</b>    | -0.0469  | 0.0188   | 6.2252  | 0.0126 |
| <b>soda80_4</b>    | -0.0353  | 0.0179   | 3.9025  | 0.0482 |
| <b>cig80_1</b>     | 0.1039   | 0.0501   | 4.3043  | 0.0380 |
| <b>cig80_2</b>     | 0.1223   | 0.0619   | 3.9084  | 0.0480 |
| <b>cig80_3</b>     | 0.1062   | 0.0540   | 3.8654  | 0.0493 |
| <b>cig80_4</b>     | 0.1108   | 0.0475   | 5.4376  | 0.0197 |
| <b>period_2</b>    | -0.5575  | 0.0993   | 31.5359 | <.0001 |
| <b>period_3</b>    | 0.5953   | 0.0689   | 74.5844 | <.0001 |



|                        |          |        |          |        |
|------------------------|----------|--------|----------|--------|
| <b>period_4</b>        | 0.8264   | 0.0509 | 263.8724 | <.0001 |
| <b>period_5</b>        | 0.4229   | 0.0721 | 34.4287  | <.0001 |
| <b>period_6</b>        | -0.0956  | 0.0366 | 6.8317   | 0.0090 |
| <b>period_7</b>        | 0.0839   | 0.0647 | 1.6801   | 0.1949 |
| <b>period_8</b>        | -0.3239  | 0.0374 | 74.8975  | <.0001 |
| <b>period_9</b>        | -0.2033  | 0.0665 | 9.3568   | 0.0022 |
| <b>period_10</b>       | -0.0641  | 0.0363 | 3.1223   | 0.0772 |
| <b>period_11</b>       | 0.1326   | 0.0659 | 4.0474   | 0.0442 |
| <b>mnp_l2</b>          | -0.0322  | 0.0232 | 1.9316   | 0.1646 |
| <b>mnp_l1</b>          | 0.0875   | 0.0296 | 8.7593   | 0.0031 |
| <b>pmh_l2</b>          | -0.0130  | 0.0196 | 0.4375   | 0.5083 |
| <b>pmh_l1</b>          | -0.0742  | 0.0214 | 11.9898  | 0.0005 |
| <b>ost_l2</b>          | -0.0898  | 0.0440 | 4.1599   | 0.0414 |
| <b>ost_l1</b>          | -0.2680  | 0.0499 | 28.9013  | <.0001 |
| <b>rpmeats_l1_1</b>    | -0.1354  | 0.0869 | 2.4292   | 0.1191 |
| <b>rpmeats_l1_1_ti</b> | -0.0911  | 0.0451 | 4.0789   | 0.0434 |
| <b>rpmeats_l1_2</b>    | -0.1085  | 0.0688 | 2.4841   | 0.1150 |
| <b>rpmeats_l1_2_ti</b> | -0.0701  | 0.0366 | 3.6713   | 0.0554 |
| <b>rpmeats_l1_3</b>    | -0.0331  | 0.0646 | 0.2622   | 0.6086 |
| <b>rpmeats_l1_3_ti</b> | -0.0459  | 0.0347 | 1.7541   | 0.1854 |
| <b>rpmeats_l1_4</b>    | -0.0372  | 0.0562 | 0.4389   | 0.5077 |
| <b>rpmeats_l1_4_ti</b> | -0.0335  | 0.0307 | 1.1921   | 0.2749 |
| <b>coff_l1_1</b>       | 0.0215   | 0.0752 | 0.0818   | 0.7748 |
| <b>coff_l1_1_ti</b>    | -0.0209  | 0.0374 | 0.3119   | 0.5765 |
| <b>coff_l1_2</b>       | 0.0112   | 0.0922 | 0.0146   | 0.9037 |
| <b>coff_l1_2_ti</b>    | -0.00919 | 0.0480 | 0.0366   | 0.8483 |
| <b>coff_l1_3</b>       | -0.00457 | 0.1058 | 0.0019   | 0.9655 |
| <b>coff_l1_3_ti</b>    | -0.0144  | 0.0563 | 0.0654   | 0.7981 |
| <b>coff_l1_4</b>       | 0.0614   | 0.0476 | 1.6675   | 0.1966 |
| <b>coff_l1_4_ti</b>    | -0.0422  | 0.0251 | 2.8274   | 0.0927 |
| <b>whgrn_l1_1</b>      | 0.0867   | 0.0707 | 1.5018   | 0.2204 |
| <b>whgrn_l1_1_ti</b>   | 0.0593   | 0.0373 | 2.5357   | 0.1113 |

|                      |          |        |         |        |
|----------------------|----------|--------|---------|--------|
| <b>whgrn_l1_2</b>    | 0.0761   | 0.0702 | 1.1746  | 0.2785 |
| <b>whgrn_l1_2_ti</b> | 0.0356   | 0.0372 | 0.9145  | 0.3389 |
| <b>whgrn_l1_3</b>    | -0.0138  | 0.0735 | 0.0350  | 0.8515 |
| <b>whgrn_l1_3_ti</b> | 0.0427   | 0.0389 | 1.2030  | 0.2727 |
| <b>whgrn_l1_4</b>    | -0.0266  | 0.0746 | 0.1272  | 0.7213 |
| <b>whgrn_l1_4_ti</b> | 0.0140   | 0.0396 | 0.1257  | 0.7230 |
| <b>soda_l1_1</b>     | -0.2769  | 0.0549 | 25.4127 | <.0001 |
| <b>soda_l1_1_ti</b>  | 0.0256   | 0.0159 | 2.5964  | 0.1071 |
| <b>soda_l1_2</b>     | -0.1498  | 0.0439 | 11.6260 | 0.0007 |
| <b>soda_l1_2_ti</b>  | 0.00530  | 0.0127 | 0.1752  | 0.6755 |
| <b>soda_l1_3</b>     | -0.1272  | 0.0427 | 8.8591  | 0.0029 |
| <b>soda_l1_3_ti</b>  | 0.0188   | 0.0127 | 2.1920  | 0.1387 |
| <b>soda_l1_4</b>     | -0.0970  | 0.0418 | 5.3716  | 0.0205 |
| <b>soda_l1_4_ti</b>  | 0.00580  | 0.0130 | 0.1980  | 0.6564 |
| <b>cal_l1_1</b>      | -0.1320  | 0.0771 | 2.9339  | 0.0867 |
| <b>cal_l1_1_ti</b>   | 0.0444   | 0.0404 | 1.2073  | 0.2719 |
| <b>cal_l1_2</b>      | -0.1610  | 0.0709 | 5.1584  | 0.0231 |
| <b>cal_l1_2_ti</b>   | 0.0541   | 0.0374 | 2.0880  | 0.1485 |
| <b>cal_l1_3</b>      | -0.1898  | 0.0684 | 7.6951  | 0.0055 |
| <b>cal_l1_3_ti</b>   | 0.0960   | 0.0363 | 6.9849  | 0.0082 |
| <b>cal_l1_4</b>      | -0.0983  | 0.0648 | 2.2978  | 0.1296 |
| <b>cal_l1_4_ti</b>   | 0.0631   | 0.0347 | 3.2995  | 0.0693 |
| <b>alc_l1_1</b>      | -0.0245  | 0.0628 | 0.1527  | 0.6960 |
| <b>alc_l1_1_ti</b>   | 0.0532   | 0.0296 | 3.2349  | 0.0721 |
| <b>alc_l1_2</b>      | -0.0335  | 0.0624 | 0.2875  | 0.5918 |
| <b>alc_l1_2_ti</b>   | 0.0518   | 0.0312 | 2.7568  | 0.0968 |
| <b>alc_l1_3</b>      | -0.00907 | 0.0743 | 0.0149  | 0.9029 |
| <b>alc_l1_3_ti</b>   | 0.0402   | 0.0394 | 1.0452  | 0.3066 |
| <b>cig_l2_1</b>      | -0.0846  | 0.0738 | 1.3128  | 0.2519 |
| <b>cig_l1_1</b>      | -0.3316  | 0.0822 | 16.2736 | <.0001 |
| <b>cig_l2_2</b>      | -0.0358  | 0.0862 | 0.1720  | 0.6783 |
| <b>cig_l1_2</b>      | -0.2011  | 0.0945 | 4.5292  | 0.0333 |

|                    |         |        |          |        |
|--------------------|---------|--------|----------|--------|
| <b>cig_l2_3</b>    | -0.0233 | 0.0758 | 0.0941   | 0.7591 |
| <b>cig_l1_3</b>    | -0.1115 | 0.0828 | 1.8121   | 0.1783 |
| <b>cig_l2_4</b>    | 0.0548  | 0.0664 | 0.6802   | 0.4095 |
| <b>cig_l1_4</b>    | -0.1464 | 0.0730 | 4.0225   | 0.0449 |
| <b>mvi_l2</b>      | 0.0296  | 0.0119 | 6.1563   | 0.0131 |
| <b>mvi_l1</b>      | -0.0133 | 0.0124 | 1.1529   | 0.2829 |
| <b>act_l1_1</b>    | 0.0739  | 0.0259 | 8.1561   | 0.0043 |
| <b>act_l1_1_ti</b> | 0.0225  | 0.0213 | 1.1138   | 0.2912 |
| <b>act_l1_2</b>    | 0.0661  | 0.0278 | 5.6650   | 0.0173 |
| <b>act_l1_2_ti</b> | 0.0110  | 0.0249 | 0.1954   | 0.6585 |
| <b>act_l1_3</b>    | 0.0118  | 0.0450 | 0.0690   | 0.7927 |
| <b>act_l1_3_ti</b> | 0.0423  | 0.0469 | 0.8116   | 0.3677 |
| <b>act_l1_4</b>    | 0.0453  | 0.0302 | 2.2391   | 0.1346 |
| <b>act_l1_4_ti</b> | -0.0260 | 0.0267 | 0.9465   | 0.3306 |
| <b>act_l1_5</b>    | 0.00249 | 0.0482 | 0.0027   | 0.9588 |
| <b>act_l1_5_ti</b> | -0.0130 | 0.0539 | 0.0585   | 0.8090 |
| <b>can_l2</b>      | 0.0977  | 0.0591 | 2.7340   | 0.0982 |
| <b>can_l1</b>      | -0.1498 | 0.0660 | 5.1454   | 0.0233 |
| <b>bmi_l2_1</b>    | 0.1029  | 0.1092 | 0.8880   | 0.3460 |
| <b>bmi_l1_1</b>    | -0.7350 | 0.1180 | 38.8025  | <.0001 |
| <b>bmi_l2_2</b>    | 0.1068  | 0.0620 | 2.9678   | 0.0849 |
| <b>bmi_l1_2</b>    | -0.4972 | 0.0641 | 60.1430  | <.0001 |
| <b>bmi_l2_3</b>    | 0.1972  | 0.0575 | 11.7821  | 0.0006 |
| <b>bmi_l1_3</b>    | -0.2811 | 0.0589 | 22.7620  | <.0001 |
| <b>bmi_l2_4</b>    | 0.2323  | 0.0535 | 18.8562  | <.0001 |
| <b>bmi_l1_4</b>    | -0.1191 | 0.0547 | 4.7429   | 0.0294 |
| <b>bmi_l2_5</b>    | 0.1402  | 0.0472 | 8.8293   | 0.0030 |
| <b>bmi_l1_5</b>    | -0.0198 | 0.0476 | 0.1727   | 0.6777 |
| <b>hbp_l2</b>      | -0.1818 | 0.0289 | 39.4655  | <.0001 |
| <b>hbp_l1</b>      | 0.4409  | 0.0278 | 251.3013 | <.0001 |
| <b>sta_l1</b>      | 1.1383  | 0.0628 | 328.2385 | <.0001 |
| <b>sta_l1_ti</b>   | -0.1578 | 0.1091 | 2.0918   | 0.1481 |

|                     |         |        |          |        |
|---------------------|---------|--------|----------|--------|
| <b>asn_l2_1</b>     | 0.0106  | 0.0225 | 0.2230   | 0.6368 |
| <b>asn_l1_1</b>     | -0.0991 | 0.0215 | 21.1673  | <.0001 |
| <b>asn_l2_2</b>     | -0.0220 | 0.0210 | 1.0981   | 0.2947 |
| <b>asn_l1_2</b>     | -0.0524 | 0.0204 | 6.6232   | 0.0101 |
| <b>angcbg_l2</b>    | -0.2194 | 0.0787 | 7.7681   | 0.0053 |
| <b>angcbg_l1</b>    | 0.4017  | 0.0647 | 38.5325  | <.0001 |
| <b>str_l2</b>       | -0.1878 | 0.1834 | 1.0482   | 0.3059 |
| <b>str_l1</b>       | 0.2783  | 0.1426 | 3.8065   | 0.0511 |
| <b>mi_l2</b>        | -0.5579 | 0.1945 | 8.2293   | 0.0041 |
| <b>mi_l1</b>        | 0.7506  | 0.1442 | 27.0888  | <.0001 |
| <b>mnp</b>          | 0.3608  | 0.0259 | 193.6595 | <.0001 |
| <b>pmh</b>          | 0.1172  | 0.0179 | 42.8290  | <.0001 |
| <b>ost</b>          | 0.3616  | 0.0332 | 118.3204 | <.0001 |
| <b>rpmeats_1</b>    | 0.5827  | 0.0343 | 288.6915 | <.0001 |
| <b>rpmeats_1_ti</b> | -0.2191 | 0.0454 | 23.2519  | <.0001 |
| <b>rpmeats_2</b>    | 0.3920  | 0.0302 | 168.0047 | <.0001 |
| <b>rpmeats_2_ti</b> | -0.1388 | 0.0373 | 13.8843  | 0.0002 |
| <b>rpmeats_3</b>    | 0.2629  | 0.0288 | 83.0550  | <.0001 |
| <b>rpmeats_3_ti</b> | -0.1227 | 0.0356 | 11.8552  | 0.0006 |
| <b>rpmeats_4</b>    | 0.1796  | 0.0273 | 43.4059  | <.0001 |
| <b>rpmeats_4_ti</b> | -0.0730 | 0.0319 | 5.2308   | 0.0222 |
| <b>coff_1</b>       | -0.0741 | 0.0427 | 3.0042   | 0.0830 |
| <b>coff_1_ti</b>    | -0.0356 | 0.0375 | 0.8983   | 0.3432 |
| <b>coff_2</b>       | 0.0132  | 0.0382 | 0.1199   | 0.7291 |
| <b>coff_2_ti</b>    | -0.0304 | 0.0485 | 0.3925   | 0.5310 |
| <b>coff_3</b>       | 0.0666  | 0.0411 | 2.6270   | 0.1051 |
| <b>coff_3_ti</b>    | -0.0160 | 0.0572 | 0.0785   | 0.7794 |
| <b>coff_4</b>       | 0.0158  | 0.0214 | 0.5423   | 0.4615 |
| <b>coff_4_ti</b>    | -0.0423 | 0.0253 | 2.7873   | 0.0950 |
| <b>whgrn_1</b>      | -0.3506 | 0.0313 | 125.1039 | <.0001 |
| <b>whgrn_1_ti</b>   | 0.0684  | 0.0377 | 3.3000   | 0.0693 |
| <b>whgrn_2</b>      | -0.3152 | 0.0282 | 125.3016 | <.0001 |

|                   |          |        |         |        |
|-------------------|----------|--------|---------|--------|
| <b>whgrn_2_ti</b> | 0.0872   | 0.0378 | 5.3299  | 0.0210 |
| <b>whgrn_3</b>    | -0.1904  | 0.0262 | 52.8778 | <.0001 |
| <b>whgrn_3_ti</b> | 0.0647   | 0.0395 | 2.6884  | 0.1011 |
| <b>whgrn_4</b>    | -0.0815  | 0.0245 | 11.0596 | 0.0009 |
| <b>whgrn_4_ti</b> | 0.0374   | 0.0401 | 0.8683  | 0.3514 |
| <b>soda_1</b>     | -0.0380  | 0.0381 | 0.9936  | 0.3189 |
| <b>soda_1_ti</b>  | 0.0752   | 0.0156 | 23.1290 | <.0001 |
| <b>soda_2</b>     | 0.00528  | 0.0310 | 0.0290  | 0.8647 |
| <b>soda_2_ti</b>  | 0.0570   | 0.0126 | 20.3926 | <.0001 |
| <b>soda_3</b>     | 0.0550   | 0.0291 | 3.5603  | 0.0592 |
| <b>soda_3_ti</b>  | 0.0217   | 0.0127 | 2.9010  | 0.0885 |
| <b>soda_4</b>     | 0.00859  | 0.0277 | 0.0962  | 0.7564 |
| <b>soda_4_ti</b>  | 0.0327   | 0.0132 | 6.1517  | 0.0131 |
| <b>cal_1</b>      | 0.1093   | 0.0354 | 9.5100  | 0.0020 |
| <b>cal_1_ti</b>   | 0.0421   | 0.0407 | 1.0678  | 0.3014 |
| <b>cal_2</b>      | 0.0660   | 0.0311 | 4.5023  | 0.0338 |
| <b>cal_2_ti</b>   | 0.0676   | 0.0379 | 3.1713  | 0.0749 |
| <b>cal_3</b>      | 0.0110   | 0.0287 | 0.1477  | 0.7008 |
| <b>cal_3_ti</b>   | 0.1014   | 0.0370 | 7.5028  | 0.0062 |
| <b>cal_4</b>      | 0.0349   | 0.0264 | 1.7511  | 0.1857 |
| <b>cal_4_ti</b>   | 0.0532   | 0.0356 | 2.2287  | 0.1355 |
| <b>alc_1</b>      | -0.00900 | 0.0364 | 0.0611  | 0.8048 |
| <b>alc_1_ti</b>   | 0.0367   | 0.0295 | 1.5523  | 0.2128 |
| <b>alc_2</b>      | 0.0145   | 0.0330 | 0.1919  | 0.6613 |
| <b>alc_2_ti</b>   | 0.0249   | 0.0313 | 0.6336  | 0.4261 |
| <b>alc_3</b>      | -0.0347  | 0.0337 | 1.0598  | 0.3033 |
| <b>alc_3_ti</b>   | 0.0300   | 0.0402 | 0.5574  | 0.4553 |
| <b>cig_1</b>      | 0.3690   | 0.0814 | 20.5645 | <.0001 |
| <b>cig_2</b>      | 0.1179   | 0.0949 | 1.5422  | 0.2143 |
| <b>cig_3</b>      | -0.0126  | 0.0846 | 0.0221  | 0.8819 |
| <b>cig_4</b>      | -0.0371  | 0.0767 | 0.2336  | 0.6288 |
| <b>mvi</b>        | 0.0289   | 0.0126 | 5.2198  | 0.0223 |

|                 |         |        |         |        |
|-----------------|---------|--------|---------|--------|
| <b>act_1</b>    | -0.0218 | 0.0229 | 0.9068  | 0.3410 |
| <b>act_1_ti</b> | -0.0142 | 0.0214 | 0.4401  | 0.5071 |
| <b>act_2</b>    | 0.0484  | 0.0242 | 3.9862  | 0.0459 |
| <b>act_2_ti</b> | -0.0167 | 0.0250 | 0.4457  | 0.5044 |
| <b>act_3</b>    | 0.0223  | 0.0400 | 0.3106  | 0.5773 |
| <b>act_3_ti</b> | 0.00481 | 0.0437 | 0.0122  | 0.9122 |
| <b>act_4</b>    | 0.0910  | 0.0262 | 12.0310 | 0.0005 |
| <b>act_4_ti</b> | -0.0305 | 0.0293 | 1.0780  | 0.2992 |
| <b>act_5</b>    | 0.0488  | 0.0417 | 1.3644  | 0.2428 |
| <b>act_5_ti</b> | 0.00961 | 0.0474 | 0.0412  | 0.8392 |
| <b>can</b>      | -0.0172 | 0.0435 | 0.1563  | 0.6926 |
| <b>bmi_1</b>    | -0.4571 | 0.1020 | 20.1012 | <.0001 |
| <b>bmi_2</b>    | -0.1818 | 0.0556 | 10.6991 | 0.0011 |
| <b>bmi_3</b>    | -0.1582 | 0.0510 | 9.6035  | 0.0019 |
| <b>bmi_4</b>    | -0.0943 | 0.0471 | 3.9992  | 0.0455 |
| <b>bmi_5</b>    | -0.0807 | 0.0418 | 3.7214  | 0.0537 |

---

## (Z) Logistic model to estimate the probability of incident hypertension

| <b>Parameter</b>     | <b>Log odds ratio</b> | <b>Standard error</b> | <b>Wald chi-square</b> | <b>P value</b> |
|----------------------|-----------------------|-----------------------|------------------------|----------------|
| <b>Intercept</b>     | -4.3185               | 0.3869                | 124.5990               | <.0001         |
| <b>fhx</b>           | 0.0623                | 0.0169                | 13.5529                | 0.0002         |
| <b>smkhx</b>         | 0.00424               | 0.0162                | 0.0680                 | 0.7942         |
| <b>ochx</b>          | 0.0158                | 0.0147                | 1.1601                 | 0.2815         |
| <b>employed_1</b>    | -0.00806              | 0.0273                | 0.0873                 | 0.7677         |
| <b>employed_2</b>    | -0.0538               | 0.0428                | 1.5806                 | 0.2087         |
| <b>employed_3</b>    | 0.0163                | 0.0220                | 0.5468                 | 0.4596         |
| <b>employed_4</b>    | 0.0144                | 0.0286                | 0.2529                 | 0.6150         |
| <b>employed_5</b>    | 0.0285                | 0.0203                | 1.9688                 | 0.1606         |
| <b>employed_6</b>    | -0.0858               | 0.0309                | 7.6977                 | 0.0055         |
| <b>employed_miss</b> | 0.0282                | 0.0993                | 0.0804                 | 0.7767         |
| <b>mar80</b>         | -0.0308               | 0.0257                | 1.4405                 | 0.2301         |
| <b>college</b>       | -0.0884               | 0.0157                | 31.6645                | <.0001         |
| <b>stress82</b>      | 0.0550                | 0.0162                | 11.5052                | 0.0007         |
| <b>stress82_miss</b> | -0.0207               | 0.0922                | 0.0502                 | 0.8226         |
| <b>hhhsch</b>        | 0.0254                | 0.0189                | 1.7930                 | 0.1806         |
| <b>hcollege</b>      | -0.00552              | 0.0207                | 0.0710                 | 0.7899         |
| <b>hgradsch</b>      | -0.0143               | 0.0219                | 0.4235                 | 0.5152         |
| <b>lbmi18_2</b>      | -0.0636               | 0.0172                | 13.7301                | 0.0002         |
| <b>lbmi18_3</b>      | -0.1139               | 0.0274                | 17.3211                | <.0001         |
| <b>lbmi18_4</b>      | -0.0414               | 0.0643                | 0.4146                 | 0.5197         |
| <b>baseage</b>       | 0.0924                | 0.0149                | 38.4976                | <.0001         |
| <b>baseage_sq</b>    | -0.00053              | 0.000147              | 12.9871                | 0.0003         |
| <b>bmi80_1</b>       | -0.00446              | 0.1014                | 0.0019                 | 0.9649         |
| <b>bmi80_2</b>       | -0.0478               | 0.0661                | 0.5228                 | 0.4696         |
| <b>bmi80_3</b>       | -0.0229               | 0.0630                | 0.1325                 | 0.7159         |
| <b>bmi80_4</b>       | 0.0104                | 0.0601                | 0.0297                 | 0.8633         |
| <b>bmi80_5</b>       | 0.0428                | 0.0581                | 0.5437                 | 0.4609         |
| <b>act80_1</b>       | -0.0251               | 0.0198                | 1.5986                 | 0.2061         |
| <b>act80_2</b>       | 0.00841               | 0.0232                | 0.1312                 | 0.7172         |
| <b>act80_3</b>       | 0.00108               | 0.0206                | 0.0027                 | 0.9583         |
| <b>alc80_1</b>       | 0.00906               | 0.0237                | 0.1468                 | 0.7016         |

|                    |          |        |          |        |
|--------------------|----------|--------|----------|--------|
| <b>alc80_2</b>     | 0.0118   | 0.0224 | 0.2771   | 0.5986 |
| <b>alc80_3</b>     | -0.0100  | 0.0249 | 0.1629   | 0.6865 |
| <b>rpmeats80_1</b> | -0.1082  | 0.0408 | 7.0168   | 0.0081 |
| <b>rpmeats80_2</b> | -0.0132  | 0.0250 | 0.2774   | 0.5984 |
| <b>rpmeats80_3</b> | 0.0146   | 0.0207 | 0.4941   | 0.4821 |
| <b>rpmeats80_4</b> | -0.0407  | 0.0189 | 4.6302   | 0.0314 |
| <b>coff80_1</b>    | -0.0432  | 0.0205 | 4.4369   | 0.0352 |
| <b>coff80_2</b>    | -0.00869 | 0.0289 | 0.0904   | 0.7637 |
| <b>coff80_3</b>    | 0.0540   | 0.0444 | 1.4799   | 0.2238 |
| <b>whgrn80_1</b>   | 0.00676  | 0.0204 | 0.1100   | 0.7401 |
| <b>whgrn80_2</b>   | -0.00041 | 0.0217 | 0.0004   | 0.9849 |
| <b>soda80_1</b>    | -0.1358  | 0.0259 | 27.5800  | <.0001 |
| <b>soda80_2</b>    | -0.1046  | 0.0225 | 21.6512  | <.0001 |
| <b>soda80_3</b>    | -0.0994  | 0.0222 | 20.0760  | <.0001 |
| <b>soda80_4</b>    | -0.0827  | 0.0212 | 15.1730  | <.0001 |
| <b>cig80_1</b>     | -0.0651  | 0.0555 | 1.3733   | 0.2412 |
| <b>cig80_2</b>     | -0.0356  | 0.0697 | 0.2610   | 0.6095 |
| <b>cig80_3</b>     | -0.0246  | 0.0605 | 0.1650   | 0.6846 |
| <b>cig80_4</b>     | -0.0161  | 0.0536 | 0.0908   | 0.7631 |
| <b>period_2</b>    | -1.0914  | 0.1145 | 90.8235  | <.0001 |
| <b>period_3</b>    | -1.1191  | 0.0873 | 164.3735 | <.0001 |
| <b>period_4</b>    | -1.4176  | 0.0797 | 316.2494 | <.0001 |
| <b>period_5</b>    | -0.9016  | 0.0864 | 108.8570 | <.0001 |
| <b>period_6</b>    | -0.8928  | 0.0370 | 582.8441 | <.0001 |
| <b>period_7</b>    | -0.5958  | 0.0755 | 62.1975  | <.0001 |
| <b>period_8</b>    | -0.5858  | 0.0341 | 294.8072 | <.0001 |
| <b>period_9</b>    | -0.3273  | 0.0758 | 18.6406  | <.0001 |
| <b>period_10</b>   | -0.1200  | 0.0317 | 14.3796  | 0.0001 |
| <b>period_11</b>   | 0.0718   | 0.0753 | 0.9105   | 0.3400 |
| <b>mnp_l2</b>      | -0.1285  | 0.0311 | 17.0760  | <.0001 |
| <b>mnp_l1</b>      | -0.1603  | 0.0401 | 15.9820  | <.0001 |
| <b>pmh_l2</b>      | 0.0331   | 0.0216 | 2.3435   | 0.1258 |
| <b>pmh_l1</b>      | 0.0897   | 0.0243 | 13.6789  | 0.0002 |
| <b>ost_l2</b>      | 0.00308  | 0.0429 | 0.0052   | 0.9427 |
| <b>ost_l1</b>      | -0.1327  | 0.0505 | 6.9071   | 0.0086 |



|                        |          |        |        |        |
|------------------------|----------|--------|--------|--------|
| <b>rpmeats_l1_1</b>    | -0.0594  | 0.1032 | 0.3309 | 0.5651 |
| <b>rpmeats_l1_1_ti</b> | -0.0213  | 0.0535 | 0.1590 | 0.6901 |
| <b>rpmeats_l1_2</b>    | 0.0422   | 0.0767 | 0.3031 | 0.5819 |
| <b>rpmeats_l1_2_ti</b> | -0.0499  | 0.0413 | 1.4620 | 0.2266 |
| <b>rpmeats_l1_3</b>    | 0.0708   | 0.0710 | 0.9960 | 0.3183 |
| <b>rpmeats_l1_3_ti</b> | -0.0735  | 0.0388 | 3.5873 | 0.0582 |
| <b>rpmeats_l1_4</b>    | 0.0171   | 0.0620 | 0.0763 | 0.7824 |
| <b>rpmeats_l1_4_ti</b> | -0.0236  | 0.0348 | 0.4611 | 0.4971 |
| <b>coff_l1_1</b>       | -0.0945  | 0.0850 | 1.2350 | 0.2664 |
| <b>coff_l1_1_ti</b>    | -0.0159  | 0.0416 | 0.1468 | 0.7016 |
| <b>coff_l1_2</b>       | -0.0705  | 0.1068 | 0.4353 | 0.5094 |
| <b>coff_l1_2_ti</b>    | -0.00512 | 0.0557 | 0.0085 | 0.9268 |
| <b>coff_l1_3</b>       | 0.1965   | 0.1100 | 3.1899 | 0.0741 |
| <b>coff_l1_3_ti</b>    | -0.1104  | 0.0593 | 3.4688 | 0.0625 |
| <b>coff_l1_4</b>       | 0.0595   | 0.0533 | 1.2464 | 0.2642 |
| <b>coff_l1_4_ti</b>    | -0.00037 | 0.0284 | 0.0002 | 0.9896 |
| <b>whgrn_l1_1</b>      | 0.0368   | 0.0808 | 0.2068 | 0.6493 |
| <b>whgrn_l1_1_ti</b>   | 0.0205   | 0.0427 | 0.2311 | 0.6307 |
| <b>whgrn_l1_2</b>      | 0.0343   | 0.0808 | 0.1809 | 0.6706 |
| <b>whgrn_l1_2_ti</b>   | -0.00664 | 0.0429 | 0.0239 | 0.8770 |
| <b>whgrn_l1_3</b>      | 0.0836   | 0.0831 | 1.0129 | 0.3142 |
| <b>whgrn_l1_3_ti</b>   | -0.0440  | 0.0441 | 0.9953 | 0.3185 |
| <b>whgrn_l1_4</b>      | -0.0130  | 0.0867 | 0.0223 | 0.8813 |
| <b>whgrn_l1_4_ti</b>   | -0.00672 | 0.0459 | 0.0214 | 0.8836 |
| <b>soda_l1_1</b>       | 0.0264   | 0.0676 | 0.1522 | 0.6964 |
| <b>soda_l1_1_ti</b>    | -0.0179  | 0.0248 | 0.5176 | 0.4719 |
| <b>soda_l1_2</b>       | 0.00120  | 0.0539 | 0.0005 | 0.9823 |
| <b>soda_l1_2_ti</b>    | 0.00698  | 0.0194 | 0.1289 | 0.7196 |
| <b>soda_l1_3</b>       | 0.0555   | 0.0525 | 1.1173 | 0.2905 |
| <b>soda_l1_3_ti</b>    | -0.0208  | 0.0195 | 1.1417 | 0.2853 |
| <b>soda_l1_4</b>       | 0.0525   | 0.0522 | 1.0118 | 0.3145 |
| <b>soda_l1_4_ti</b>    | -0.0250  | 0.0202 | 1.5325 | 0.2157 |
| <b>cal_l1_1</b>        | -0.0399  | 0.0879 | 0.2056 | 0.6502 |
| <b>cal_l1_1_ti</b>     | 0.000331 | 0.0462 | 0.0001 | 0.9943 |
| <b>cal_l1_2</b>        | -0.0194  | 0.0803 | 0.0583 | 0.8093 |

|                    |          |        |         |        |
|--------------------|----------|--------|---------|--------|
| <b>cal_l1_2_ti</b> | -0.0158  | 0.0427 | 0.1377  | 0.7106 |
| <b>cal_l1_3</b>    | 0.0559   | 0.0761 | 0.5387  | 0.4630 |
| <b>cal_l1_3_ti</b> | -0.0420  | 0.0408 | 1.0600  | 0.3032 |
| <b>cal_l1_4</b>    | 0.0913   | 0.0729 | 1.5682  | 0.2105 |
| <b>cal_l1_4_ti</b> | -0.0220  | 0.0394 | 0.3117  | 0.5766 |
| <b>alc_l1_1</b>    | -0.1750  | 0.0697 | 6.2970  | 0.0121 |
| <b>alc_l1_1_ti</b> | 0.00185  | 0.0326 | 0.0032  | 0.9549 |
| <b>alc_l1_2</b>    | -0.2438  | 0.0701 | 12.0996 | 0.0005 |
| <b>alc_l1_2_ti</b> | 0.0427   | 0.0351 | 1.4785  | 0.2240 |
| <b>alc_l1_3</b>    | -0.1818  | 0.0839 | 4.6951  | 0.0302 |
| <b>alc_l1_3_ti</b> | 0.0514   | 0.0447 | 1.3217  | 0.2503 |
| <b>cig_l2_1</b>    | -0.1723  | 0.0953 | 3.2685  | 0.0706 |
| <b>cig_l1_1</b>    | -0.2999  | 0.1079 | 7.7224  | 0.0055 |
| <b>cig_l2_2</b>    | -0.2062  | 0.1123 | 3.3711  | 0.0663 |
| <b>cig_l1_2</b>    | -0.3484  | 0.1252 | 7.7460  | 0.0054 |
| <b>cig_l2_3</b>    | 0.1168   | 0.0973 | 1.4423  | 0.2298 |
| <b>cig_l1_3</b>    | -0.2162  | 0.1096 | 3.8916  | 0.0485 |
| <b>cig_l2_4</b>    | 0.0418   | 0.0870 | 0.2310  | 0.6308 |
| <b>cig_l1_4</b>    | -0.00250 | 0.0973 | 0.0007  | 0.9795 |
| <b>mvi_l2</b>      | 0.0113   | 0.0159 | 0.5050  | 0.4773 |
| <b>mvi_l1</b>      | 0.0266   | 0.0169 | 2.4679  | 0.1162 |
| <b>act_l1_1</b>    | 0.0298   | 0.0287 | 1.0803  | 0.2986 |
| <b>act_l1_1_ti</b> | -0.0224  | 0.0259 | 0.7482  | 0.3870 |
| <b>act_l1_2</b>    | 0.0492   | 0.0308 | 2.5612  | 0.1095 |
| <b>act_l1_2_ti</b> | -0.0567  | 0.0308 | 3.3932  | 0.0655 |
| <b>act_l1_3</b>    | -0.0810  | 0.0529 | 2.3507  | 0.1252 |
| <b>act_l1_3_ti</b> | 0.0820   | 0.0608 | 1.8206  | 0.1772 |
| <b>act_l1_4</b>    | 0.0139   | 0.0335 | 0.1713  | 0.6790 |
| <b>act_l1_4_ti</b> | -0.0220  | 0.0315 | 0.4896  | 0.4841 |
| <b>act_l1_5</b>    | -0.0383  | 0.0545 | 0.4927  | 0.4827 |
| <b>act_l1_5_ti</b> | 0.0287   | 0.0699 | 0.1680  | 0.6819 |
| <b>can_l2</b>      | 0.1190   | 0.0645 | 3.4000  | 0.0652 |
| <b>can_l1</b>      | -0.1460  | 0.0754 | 3.7516  | 0.0528 |
| <b>bmi_l2_1</b>    | -0.1016  | 0.1289 | 0.6215  | 0.4305 |
| <b>bmi_l1_1</b>    | -0.5093  | 0.1329 | 14.6875 | 0.0001 |

|                     |          |        |          |        |
|---------------------|----------|--------|----------|--------|
| <b>bmi_l2_2</b>     | 0.0477   | 0.0708 | 0.4541   | 0.5004 |
| <b>bmi_l1_2</b>     | -0.5473  | 0.0745 | 53.9560  | <.0001 |
| <b>bmi_l2_3</b>     | 0.0872   | 0.0643 | 1.8379   | 0.1752 |
| <b>bmi_l1_3</b>     | -0.4304  | 0.0670 | 41.2921  | <.0001 |
| <b>bmi_l2_4</b>     | 0.0730   | 0.0593 | 1.5177   | 0.2180 |
| <b>bmi_l1_4</b>     | -0.2705  | 0.0614 | 19.3815  | <.0001 |
| <b>bmi_l2_5</b>     | 0.0485   | 0.0518 | 0.8762   | 0.3492 |
| <b>bmi_l1_5</b>     | -0.1149  | 0.0528 | 4.7384   | 0.0295 |
| <b>chl_l2</b>       | -0.1261  | 0.0305 | 17.1086  | <.0001 |
| <b>chl_l1</b>       | -0.7958  | 0.0338 | 553.6121 | <.0001 |
| <b>sta_l1</b>       | 0.0297   | 0.0265 | 1.2558   | 0.2624 |
| <b>sta_l1_ti</b>    | 0.0281   | 0.0408 | 0.4740   | 0.4911 |
| <b>asn_l2_1</b>     | -0.0751  | 0.0234 | 10.2567  | 0.0014 |
| <b>asn_l1_1</b>     | -0.1667  | 0.0226 | 54.5220  | <.0001 |
| <b>asn_l2_2</b>     | -0.0452  | 0.0224 | 4.0949   | 0.0430 |
| <b>asn_l1_2</b>     | -0.0887  | 0.0218 | 16.5750  | <.0001 |
| <b>angcbg_l2</b>    | -0.4446  | 0.0942 | 22.2885  | <.0001 |
| <b>angcbg_l1</b>    | 0.3215   | 0.0832 | 14.9500  | 0.0001 |
| <b>str_l2</b>       | -0.4356  | 0.2073 | 4.4163   | 0.0356 |
| <b>str_l1</b>       | 0.5981   | 0.1693 | 12.4834  | 0.0004 |
| <b>mi_l2</b>        | 0.2067   | 0.2187 | 0.8933   | 0.3446 |
| <b>mi_l1</b>        | -0.1195  | 0.1892 | 0.3987   | 0.5277 |
| <b>mnp</b>          | 0.1096   | 0.0350 | 9.7760   | 0.0018 |
| <b>pmh</b>          | 0.1396   | 0.0209 | 44.6358  | <.0001 |
| <b>ost</b>          | 0.1647   | 0.0349 | 22.2584  | <.0001 |
| <b>rpmeats_1</b>    | 0.0194   | 0.0405 | 0.2300   | 0.6315 |
| <b>rpmeats_1_ti</b> | 0.0313   | 0.0541 | 0.3334   | 0.5637 |
| <b>rpmeats_2</b>    | -0.00441 | 0.0360 | 0.0150   | 0.9026 |
| <b>rpmeats_2_ti</b> | 0.00574  | 0.0423 | 0.0184   | 0.8921 |
| <b>rpmeats_3</b>    | 0.0274   | 0.0344 | 0.6328   | 0.4263 |
| <b>rpmeats_3_ti</b> | -0.0540  | 0.0402 | 1.8097   | 0.1785 |
| <b>rpmeats_4</b>    | -0.00810 | 0.0329 | 0.0607   | 0.8054 |
| <b>rpmeats_4_ti</b> | 0.0133   | 0.0365 | 0.1321   | 0.7163 |
| <b>coff_1</b>       | 0.2843   | 0.0508 | 31.3742  | <.0001 |
| <b>coff_1_ti</b>    | -0.0691  | 0.0419 | 2.7161   | 0.0993 |

|                   |          |        |         |        |
|-------------------|----------|--------|---------|--------|
| <b>coff_2</b>     | 0.2203   | 0.0443 | 24.7282 | <.0001 |
| <b>coff_2_ti</b>  | -0.0214  | 0.0562 | 0.1450  | 0.7034 |
| <b>coff_3</b>     | 0.1907   | 0.0466 | 16.7496 | <.0001 |
| <b>coff_3_ti</b>  | -0.1656  | 0.0607 | 7.4544  | 0.0063 |
| <b>coff_4</b>     | 0.1124   | 0.0261 | 18.5950 | <.0001 |
| <b>coff_4_ti</b>  | -0.0444  | 0.0289 | 2.3681  | 0.1238 |
| <b>whgrn_1</b>    | 0.0186   | 0.0369 | 0.2549  | 0.6137 |
| <b>whgrn_1_ti</b> | 0.0239   | 0.0435 | 0.3018  | 0.5828 |
| <b>whgrn_2</b>    | 0.0407   | 0.0329 | 1.5299  | 0.2161 |
| <b>whgrn_2_ti</b> | 0.0143   | 0.0438 | 0.1067  | 0.7439 |
| <b>whgrn_3</b>    | 0.00808  | 0.0311 | 0.0676  | 0.7949 |
| <b>whgrn_3_ti</b> | 0.00584  | 0.0450 | 0.0168  | 0.8968 |
| <b>whgrn_4</b>    | -0.00938 | 0.0295 | 0.1013  | 0.7503 |
| <b>whgrn_4_ti</b> | 0.0313   | 0.0470 | 0.4431  | 0.5056 |
| <b>soda_1</b>     | -0.0446  | 0.0446 | 1.0030  | 0.3166 |
| <b>soda_1_ti</b>  | -0.0347  | 0.0250 | 1.9224  | 0.1656 |
| <b>soda_2</b>     | -0.0624  | 0.0377 | 2.7417  | 0.0978 |
| <b>soda_2_ti</b>  | 0.00199  | 0.0196 | 0.0103  | 0.9190 |
| <b>soda_3</b>     | -0.0454  | 0.0360 | 1.5899  | 0.2073 |
| <b>soda_3_ti</b>  | -0.00403 | 0.0197 | 0.0419  | 0.8379 |
| <b>soda_4</b>     | 0.0164   | 0.0340 | 0.2316  | 0.6303 |
| <b>soda_4_ti</b>  | -0.0507  | 0.0207 | 6.0285  | 0.0141 |
| <b>cal_1</b>      | 0.1732   | 0.0409 | 17.8994 | <.0001 |
| <b>cal_1_ti</b>   | -0.0949  | 0.0468 | 4.1092  | 0.0426 |
| <b>cal_2</b>      | 0.0910   | 0.0364 | 6.2283  | 0.0126 |
| <b>cal_2_ti</b>   | -0.0678  | 0.0435 | 2.4316  | 0.1189 |
| <b>cal_3</b>      | 0.0844   | 0.0335 | 6.3450  | 0.0118 |
| <b>cal_3_ti</b>   | -0.0921  | 0.0418 | 4.8641  | 0.0274 |
| <b>cal_4</b>      | 0.0407   | 0.0312 | 1.6998  | 0.1923 |
| <b>cal_4_ti</b>   | -0.0623  | 0.0406 | 2.3545  | 0.1249 |
| <b>alc_1</b>      | 0.0215   | 0.0421 | 0.2603  | 0.6099 |
| <b>alc_1_ti</b>   | -0.0163  | 0.0327 | 0.2472  | 0.6190 |
| <b>alc_2</b>      | -0.0256  | 0.0380 | 0.4542  | 0.5003 |
| <b>alc_2_ti</b>   | 0.0430   | 0.0355 | 1.4693  | 0.2255 |
| <b>alc_3</b>      | -0.0898  | 0.0388 | 5.3541  | 0.0207 |

|                 |         |        |           |        |
|-----------------|---------|--------|-----------|--------|
| <b>alc_3_ti</b> | 0.0730  | 0.0459 | 2.5307    | 0.1116 |
| <b>cig_1</b>    | 0.3550  | 0.1033 | 11.8115   | 0.0006 |
| <b>cig_2</b>    | 0.1241  | 0.1210 | 1.0521    | 0.3050 |
| <b>cig_3</b>    | -0.1457 | 0.1084 | 1.8056    | 0.1790 |
| <b>cig_4</b>    | -0.2478 | 0.0988 | 6.2903    | 0.0121 |
| <b>mvi</b>      | 0.0137  | 0.0163 | 0.7106    | 0.3992 |
| <b>act_1</b>    | 0.0915  | 0.0264 | 12.0014   | 0.0005 |
| <b>act_1_ti</b> | 0.0677  | 0.0395 | 2.9427    | 0.0863 |
| <b>act_2</b>    | 0.0298  | 0.0283 | 1.1108    | 0.2919 |
| <b>act_2_ti</b> | 0.00865 | 0.0463 | 0.0349    | 0.8519 |
| <b>act_3</b>    | 0.0355  | 0.0475 | 0.5576    | 0.4552 |
| <b>act_3_ti</b> | 0.00553 | 0.0819 | 0.0046    | 0.9461 |
| <b>act_4</b>    | 0.0235  | 0.0307 | 0.5844    | 0.4446 |
| <b>act_4_ti</b> | 0.0367  | 0.0540 | 0.4624    | 0.4965 |
| <b>act_5</b>    | -0.0524 | 0.0508 | 1.0626    | 0.3026 |
| <b>act_5_ti</b> | 0.1562  | 0.0824 | 3.5944    | 0.0580 |
| <b>can</b>      | 0.00382 | 0.0493 | 0.0060    | 0.9383 |
| <b>bmi_1</b>    | -0.7588 | 0.1129 | 45.1732   | <.0001 |
| <b>bmi_2</b>    | -0.7582 | 0.0652 | 135.1960  | <.0001 |
| <b>bmi_3</b>    | -0.6395 | 0.0586 | 119.1737  | <.0001 |
| <b>bmi_4</b>    | -0.4559 | 0.0534 | 72.9674   | <.0001 |
| <b>bmi_5</b>    | -0.2037 | 0.0465 | 19.1770   | <.0001 |
| <b>chl</b>      | 1.1567  | 0.0220 | 2763.5670 | <.0001 |

---

(AA) Logistic model to estimate the probability of taking statins

| <b>Variable</b>      | <b>Log odds ratio</b> | <b>Standard error</b> | <b>Wald chi-square</b> | <b>P value</b> |
|----------------------|-----------------------|-----------------------|------------------------|----------------|
| <b>Intercept</b>     | -7.3639               | 0.3573                | 424.8521               | <.0001         |
| <b>fhx</b>           | 0.0222                | 0.0147                | 2.2773                 | 0.1313         |
| <b>smkhx</b>         | 0.0184                | 0.0140                | 1.7281                 | 0.1887         |
| <b>ochx</b>          | 0.00769               | 0.0128                | 0.3600                 | 0.5485         |
| <b>employed_1</b>    | 0.0174                | 0.0238                | 0.5335                 | 0.4651         |
| <b>employed_2</b>    | -0.0167               | 0.0384                | 0.1900                 | 0.6629         |
| <b>employed_3</b>    | -0.00512              | 0.0194                | 0.0701                 | 0.7912         |
| <b>employed_4</b>    | 0.0288                | 0.0249                | 1.3341                 | 0.2481         |
| <b>employed_5</b>    | 0.0281                | 0.0178                | 2.4913                 | 0.1145         |
| <b>employed_6</b>    | 0.0268                | 0.0266                | 1.0205                 | 0.3124         |
| <b>employed_miss</b> | -0.1305               | 0.0870                | 2.2493                 | 0.1337         |
| <b>mar80</b>         | 0.0501                | 0.0230                | 4.7473                 | 0.0293         |
| <b>college</b>       | -0.0428               | 0.0137                | 9.7314                 | 0.0018         |
| <b>stress82</b>      | -0.0375               | 0.0144                | 6.7870                 | 0.0092         |
| <b>stress82_miss</b> | -0.00575              | 0.0804                | 0.0051                 | 0.9430         |
| <b>hhighsch</b>      | 0.1427                | 0.0172                | 68.8434                | <.0001         |
| <b>hcollege</b>      | 0.1400                | 0.0186                | 56.5938                | <.0001         |
| <b>hgradsch</b>      | 0.1717                | 0.0197                | 76.2699                | <.0001         |
| <b>lbmi18_2</b>      | -0.0643               | 0.0151                | 18.1609                | <.0001         |
| <b>lbmi18_3</b>      | -0.0235               | 0.0243                | 0.9390                 | 0.3325         |
| <b>lbmi18_4</b>      | 0.0206                | 0.0581                | 0.1258                 | 0.7229         |
| <b>baseage</b>       | 0.0913                | 0.0134                | 46.2914                | <.0001         |
| <b>baseage_sq</b>    | -0.00097              | 0.000132              | 53.6627                | <.0001         |
| <b>bmi80_1</b>       | 0.4219                | 0.0849                | 24.7090                | <.0001         |
| <b>bmi80_2</b>       | 0.2177                | 0.0530                | 16.8556                | <.0001         |
| <b>bmi80_3</b>       | 0.1913                | 0.0506                | 14.2680                | 0.0002         |
| <b>bmi80_4</b>       | 0.1385                | 0.0484                | 8.1767                 | 0.0042         |
| <b>bmi80_5</b>       | 0.0625                | 0.0477                | 1.7159                 | 0.1902         |
| <b>act80_1</b>       | 0.0356                | 0.0168                | 4.4937                 | 0.0340         |
| <b>act80_2</b>       | 0.0227                | 0.0198                | 1.3134                 | 0.2518         |
| <b>act80_3</b>       | 0.0104                | 0.0176                | 0.3529                 | 0.5525         |
| <b>alc80_1</b>       | 0.0298                | 0.0198                | 2.2753                 | 0.1315         |

|                        |          |        |          |        |
|------------------------|----------|--------|----------|--------|
| <b>alc80_2</b>         | 0.0746   | 0.0190 | 15.3505  | <.0001 |
| <b>alc80_3</b>         | 0.0694   | 0.0217 | 10.2093  | 0.0014 |
| <b>rpmeats80_1</b>     | -0.1868  | 0.0353 | 27.9321  | <.0001 |
| <b>rpmeats80_2</b>     | -0.0340  | 0.0212 | 2.5676   | 0.1091 |
| <b>rpmeats80_3</b>     | -0.0118  | 0.0182 | 0.4209   | 0.5165 |
| <b>rpmeats80_4</b>     | -0.00341 | 0.0163 | 0.0437   | 0.8345 |
| <b>coff80_1</b>        | 0.0374   | 0.0171 | 4.8110   | 0.0283 |
| <b>coff80_2</b>        | 0.0136   | 0.0249 | 0.2968   | 0.5859 |
| <b>coff80_3</b>        | 0.00848  | 0.0385 | 0.0484   | 0.8259 |
| <b>whgrn80_1</b>       | 0.0868   | 0.0177 | 24.0667  | <.0001 |
| <b>whgrn80_2</b>       | 0.0553   | 0.0189 | 8.6050   | 0.0034 |
| <b>soda80_1</b>        | -0.0534  | 0.0221 | 5.8344   | 0.0157 |
| <b>soda80_2</b>        | -0.0615  | 0.0193 | 10.1148  | 0.0015 |
| <b>soda80_3</b>        | -0.0270  | 0.0192 | 1.9698   | 0.1605 |
| <b>soda80_4</b>        | 0.00598  | 0.0184 | 0.1049   | 0.7460 |
| <b>cig80_1</b>         | -0.1101  | 0.0466 | 5.5738   | 0.0182 |
| <b>cig80_2</b>         | -0.0984  | 0.0593 | 2.7562   | 0.0969 |
| <b>cig80_3</b>         | -0.0296  | 0.0513 | 0.3331   | 0.5638 |
| <b>cig80_4</b>         | 0.0105   | 0.0459 | 0.0521   | 0.8194 |
| <b>period_3</b>        | -1.2727  | 0.0910 | 195.4459 | <.0001 |
| <b>period_6</b>        | -0.5342  | 0.0272 | 385.0942 | <.0001 |
| <b>period_7</b>        | -1.0987  | 0.0681 | 260.4793 | <.0001 |
| <b>period_8</b>        | -0.6259  | 0.0243 | 664.5233 | <.0001 |
| <b>period_9</b>        | -0.2581  | 0.0676 | 14.5784  | 0.0001 |
| <b>period_10</b>       | -0.4460  | 0.0220 | 409.9754 | <.0001 |
| <b>period_11</b>       | 0.0603   | 0.0671 | 0.8080   | 0.3687 |
| <b>mnp_l2</b>          | 0.1375   | 0.0335 | 16.8726  | <.0001 |
| <b>mnp_l1</b>          | 0.1807   | 0.0494 | 13.3877  | 0.0003 |
| <b>pmh_l2</b>          | 0.0826   | 0.0174 | 22.5466  | <.0001 |
| <b>pmh_l1</b>          | -0.1162  | 0.0202 | 33.2064  | <.0001 |
| <b>ost_l2</b>          | -0.0849  | 0.0316 | 7.2112   | 0.0072 |
| <b>ost_l1</b>          | -0.0493  | 0.0387 | 1.6204   | 0.2030 |
| <b>rpmeats_l1_1</b>    | 0.0189   | 0.0500 | 0.1425   | 0.7058 |
| <b>rpmeats_l1_1_ti</b> | -0.00083 | 0.0252 | 0.0011   | 0.9738 |
| <b>rpmeats_l1_2</b>    | 0.0455   | 0.0474 | 0.9229   | 0.3367 |

|                        |          |        |        |        |
|------------------------|----------|--------|--------|--------|
| <b>rpmeats_l1_2_ti</b> | -0.0163  | 0.0248 | 0.4292 | 0.5124 |
| <b>rpmeats_l1_3</b>    | 0.0179   | 0.0470 | 0.1442 | 0.7041 |
| <b>rpmeats_l1_3_ti</b> | 0.00999  | 0.0252 | 0.1565 | 0.6924 |
| <b>rpmeats_l1_4</b>    | 0.0570   | 0.0472 | 1.4594 | 0.2270 |
| <b>rpmeats_l1_4_ti</b> | -0.0120  | 0.0261 | 0.2099 | 0.6469 |
| <b>coff_l1_1</b>       | 0.0362   | 0.0543 | 0.4438 | 0.5053 |
| <b>coff_l1_1_ti</b>    | -0.00535 | 0.0215 | 0.0620 | 0.8033 |
| <b>coff_l1_2</b>       | 0.1358   | 0.0504 | 7.2678 | 0.0070 |
| <b>coff_l1_2_ti</b>    | -0.0291  | 0.0247 | 1.3898 | 0.2384 |
| <b>coff_l1_3</b>       | 0.0877   | 0.0563 | 2.4282 | 0.1192 |
| <b>coff_l1_3_ti</b>    | 0.00270  | 0.0305 | 0.0078 | 0.9295 |
| <b>coff_l1_4</b>       | 0.0147   | 0.0325 | 0.2044 | 0.6512 |
| <b>coff_l1_4_ti</b>    | 0.0233   | 0.0164 | 2.0242 | 0.1548 |
| <b>whgrn_l1_1</b>      | 0.0611   | 0.0447 | 1.8694 | 0.1715 |
| <b>whgrn_l1_1_ti</b>   | -0.0353  | 0.0229 | 2.3815 | 0.1228 |
| <b>whgrn_l1_2</b>      | 0.00675  | 0.0403 | 0.0280 | 0.8670 |
| <b>whgrn_l1_2_ti</b>   | 0.00790  | 0.0216 | 0.1341 | 0.7142 |
| <b>whgrn_l1_3</b>      | -0.0254  | 0.0379 | 0.4511 | 0.5018 |
| <b>whgrn_l1_3_ti</b>   | 0.0224   | 0.0208 | 1.1651 | 0.2804 |
| <b>whgrn_l1_4</b>      | -0.0359  | 0.0360 | 0.9956 | 0.3184 |
| <b>whgrn_l1_4_ti</b>   | 0.0239   | 0.0202 | 1.3989 | 0.2369 |
| <b>soda_l1_1</b>       | -0.1954  | 0.0720 | 7.3596 | 0.0067 |
| <b>soda_l1_1_ti</b>    | 0.0395   | 0.0335 | 1.3920 | 0.2381 |
| <b>soda_l1_2</b>       | -0.0971  | 0.0589 | 2.7128 | 0.0995 |
| <b>soda_l1_2_ti</b>    | 0.0298   | 0.0275 | 1.1768 | 0.2780 |
| <b>soda_l1_3</b>       | -0.0795  | 0.0590 | 1.8160 | 0.1778 |
| <b>soda_l1_3_ti</b>    | 0.0287   | 0.0280 | 1.0440 | 0.3069 |
| <b>soda_l1_4</b>       | -0.0208  | 0.0586 | 0.1259 | 0.7227 |
| <b>soda_l1_4_ti</b>    | 0.0282   | 0.0284 | 0.9866 | 0.3206 |
| <b>cal_l1_1</b>        | -0.0343  | 0.0481 | 0.5078 | 0.4761 |
| <b>cal_l1_1_ti</b>     | 0.00360  | 0.0241 | 0.0224 | 0.8810 |
| <b>cal_l1_2</b>        | -0.0223  | 0.0440 | 0.2582 | 0.6114 |
| <b>cal_l1_2_ti</b>     | 0.0201   | 0.0228 | 0.7779 | 0.3778 |
| <b>cal_l1_3</b>        | 0.0143   | 0.0416 | 0.1180 | 0.7312 |
| <b>cal_l1_3_ti</b>     | 0.0161   | 0.0222 | 0.5229 | 0.4696 |



|                    |          |        |        |        |
|--------------------|----------|--------|--------|--------|
| <b>cal_l1_4</b>    | 0.0364   | 0.0397 | 0.8390 | 0.3597 |
| <b>cal_l1_4_ti</b> | -0.00047 | 0.0220 | 0.0005 | 0.9829 |
| <b>alc_l1_1</b>    | -0.00731 | 0.0439 | 0.0276 | 0.8680 |
| <b>alc_l1_1_ti</b> | 0.00658  | 0.0170 | 0.1489 | 0.6995 |
| <b>alc_l1_2</b>    | 0.0661   | 0.0429 | 2.3734 | 0.1234 |
| <b>alc_l1_2_ti</b> | -0.0270  | 0.0191 | 1.9902 | 0.1583 |
| <b>alc_l1_3</b>    | 0.0823   | 0.0476 | 2.9914 | 0.0837 |
| <b>alc_l1_3_ti</b> | -0.0532  | 0.0251 | 4.4976 | 0.0339 |
| <b>cig_l2_1</b>    | -0.0238  | 0.1052 | 0.0512 | 0.8210 |
| <b>cig_l1_1</b>    | -0.00378 | 0.1265 | 0.0009 | 0.9762 |
| <b>cig_l2_2</b>    | 0.0129   | 0.1181 | 0.0120 | 0.9129 |
| <b>cig_l1_2</b>    | 0.0277   | 0.1387 | 0.0399 | 0.8416 |
| <b>cig_l2_3</b>    | -0.00177 | 0.1070 | 0.0003 | 0.9868 |
| <b>cig_l1_3</b>    | 0.0624   | 0.1267 | 0.2428 | 0.6222 |
| <b>cig_l2_4</b>    | 0.0322   | 0.0990 | 0.1058 | 0.7450 |
| <b>cig_l1_4</b>    | 0.0821   | 0.1173 | 0.4897 | 0.4841 |
| <b>mvi_l2</b>      | -0.0187  | 0.0157 | 1.4132 | 0.2345 |
| <b>mvi_l1</b>      | 0.00320  | 0.0172 | 0.0347 | 0.8521 |
| <b>act_l1_1</b>    | -0.0446  | 0.0232 | 3.6824 | 0.0550 |
| <b>act_l1_2</b>    | -0.00147 | 0.0245 | 0.0036 | 0.9522 |
| <b>act_l1_3</b>    | -0.0691  | 0.0419 | 2.7154 | 0.0994 |
| <b>act_l1_4</b>    | 0.00412  | 0.0261 | 0.0248 | 0.8749 |
| <b>act_l1_5</b>    | 0.0783   | 0.0415 | 3.5491 | 0.0596 |
| <b>can_l2</b>      | 0.0728   | 0.0474 | 2.3598 | 0.1245 |
| <b>can_l1</b>      | 0.0446   | 0.0592 | 0.5681 | 0.4510 |
| <b>bmi_l2_1</b>    | 0.1321   | 0.1126 | 1.3764 | 0.2407 |
| <b>bmi_l1_1</b>    | -0.3192  | 0.1188 | 7.2191 | 0.0072 |
| <b>bmi_l2_2</b>    | 0.1426   | 0.0594 | 5.7675 | 0.0163 |
| <b>bmi_l1_2</b>    | -0.1856  | 0.0647 | 8.2255 | 0.0041 |
| <b>bmi_l2_3</b>    | 0.1232   | 0.0536 | 5.2924 | 0.0214 |
| <b>bmi_l1_3</b>    | -0.0811  | 0.0579 | 1.9642 | 0.1611 |
| <b>bmi_l2_4</b>    | 0.0752   | 0.0490 | 2.3574 | 0.1247 |
| <b>bmi_l1_4</b>    | -0.00911 | 0.0528 | 0.0297 | 0.8632 |
| <b>bmi_l2_5</b>    | 0.0304   | 0.0429 | 0.5022 | 0.4785 |
| <b>bmi_l1_5</b>    | 0.0199   | 0.0456 | 0.1902 | 0.6627 |

|                  |         |        |            |        |
|------------------|---------|--------|------------|--------|
| <b>chl_l2</b>    | 0.1762  | 0.0241 | 53.2379    | <.0001 |
| <b>chl_l1</b>    | -0.4917 | 0.0305 | 260.1647   | <.0001 |
| <b>hbp_l2</b>    | -0.0888 | 0.0264 | 11.2866    | 0.0008 |
| <b>hbp_l1</b>    | -0.0987 | 0.0346 | 8.1256     | 0.0044 |
| <b>sta_l1</b>    | 3.4064  | 0.0151 | 50630.9491 | <.0001 |
| <b>sta_l1_ti</b> | -0.2493 | 0.0169 | 218.1835   | <.0001 |
| <b>asn_l2_1</b>  | -0.1364 | 0.0182 | 56.4565    | <.0001 |
| <b>asn_l1_1</b>  | -0.1402 | 0.0174 | 64.7531    | <.0001 |
| <b>asn_l2_2</b>  | -0.1463 | 0.0179 | 66.8141    | <.0001 |
| <b>asn_l1_2</b>  | -0.1429 | 0.0178 | 64.7782    | <.0001 |
| <b>angcbg_l2</b> | -0.5688 | 0.0591 | 92.6675    | <.0001 |
| <b>angcbg_l1</b> | 0.8230  | 0.0544 | 229.0574   | <.0001 |
| <b>str_l2</b>    | -0.4115 | 0.1192 | 11.9265    | 0.0006 |
| <b>str_l1</b>    | 0.4051  | 0.1015 | 15.9357    | <.0001 |
| <b>mi_l2</b>     | -0.3950 | 0.1266 | 9.7367     | 0.0018 |
| <b>mi_l1</b>     | 0.9546  | 0.1113 | 73.5666    | <.0001 |
| <b>mnp</b>       | 0.2098  | 0.0519 | 16.3055    | <.0001 |
| <b>pmh</b>       | -0.0300 | 0.0182 | 2.7130     | 0.0995 |
| <b>ost</b>       | 0.0772  | 0.0278 | 7.7281     | 0.0054 |
| <b>rpmeats_1</b> | 0.2141  | 0.0367 | 33.9690    | <.0001 |
| <b>rpmeats_2</b> | 0.1467  | 0.0341 | 18.4613    | <.0001 |
| <b>rpmeats_3</b> | 0.1213  | 0.0333 | 13.2361    | 0.0003 |
| <b>rpmeats_4</b> | 0.0403  | 0.0333 | 1.4681     | 0.2256 |
| <b>coff_1</b>    | -0.0824 | 0.0447 | 3.3985     | 0.0653 |
| <b>coff_2</b>    | -0.1134 | 0.0374 | 9.1798     | 0.0024 |
| <b>coff_3</b>    | -0.0444 | 0.0395 | 1.2633     | 0.2610 |
| <b>coff_4</b>    | 0.0243  | 0.0237 | 1.0513     | 0.3052 |
| <b>whgrn_1</b>   | -0.1810 | 0.0326 | 30.9084    | <.0001 |
| <b>whgrn_2</b>   | -0.1157 | 0.0284 | 16.5762    | <.0001 |
| <b>whgrn_3</b>   | -0.0442 | 0.0262 | 2.8390     | 0.0920 |
| <b>whgrn_4</b>   | -0.0161 | 0.0245 | 0.4349     | 0.5096 |
| <b>soda_1</b>    | -0.0564 | 0.0356 | 2.5210     | 0.1123 |
| <b>soda_1_ti</b> | 0.0615  | 0.0292 | 4.4384     | 0.0351 |
| <b>soda_2</b>    | -0.0575 | 0.0306 | 3.5440     | 0.0598 |
| <b>soda_2_ti</b> | 0.0550  | 0.0235 | 5.4518     | 0.0195 |

|                  |         |        |           |        |
|------------------|---------|--------|-----------|--------|
| <b>soda_3</b>    | -0.0313 | 0.0294 | 1.1330    | 0.2871 |
| <b>soda_3_ti</b> | 0.0307  | 0.0240 | 1.6348    | 0.2010 |
| <b>soda_4</b>    | -0.0463 | 0.0284 | 2.6605    | 0.1029 |
| <b>soda_4_ti</b> | 0.0305  | 0.0242 | 1.5856    | 0.2080 |
| <b>cal_1</b>     | 0.1792  | 0.0351 | 26.0023   | <.0001 |
| <b>cal_2</b>     | 0.1313  | 0.0316 | 17.3042   | <.0001 |
| <b>cal_3</b>     | 0.0763  | 0.0295 | 6.6947    | 0.0097 |
| <b>cal_4</b>     | 0.0531  | 0.0277 | 3.6686    | 0.0554 |
| <b>alc_1</b>     | -0.0148 | 0.0363 | 0.1674    | 0.6824 |
| <b>alc_2</b>     | -0.0272 | 0.0333 | 0.6635    | 0.4153 |
| <b>alc_3</b>     | -0.0212 | 0.0341 | 0.3861    | 0.5344 |
| <b>cig_1</b>     | 0.3066  | 0.1285 | 5.6951    | 0.0170 |
| <b>cig_2</b>     | 0.2150  | 0.1414 | 2.3126    | 0.1283 |
| <b>cig_3</b>     | 0.2132  | 0.1306 | 2.6644    | 0.1026 |
| <b>cig_4</b>     | 0.1505  | 0.1234 | 1.4870    | 0.2227 |
| <b>mvi</b>       | 0.0778  | 0.0165 | 22.2203   | <.0001 |
| <b>act_1</b>     | -0.0179 | 0.0235 | 0.5792    | 0.4466 |
| <b>act_2</b>     | 0.00834 | 0.0250 | 0.1115    | 0.7384 |
| <b>act_3</b>     | -0.0100 | 0.0445 | 0.0509    | 0.8216 |
| <b>act_4</b>     | 0.0447  | 0.0266 | 2.8289    | 0.0926 |
| <b>act_5</b>     | 0.0175  | 0.0440 | 0.1581    | 0.6909 |
| <b>can</b>       | -0.1442 | 0.0416 | 12.0228   | 0.0005 |
| <b>bmi_1</b>     | -0.7212 | 0.1000 | 52.0502   | <.0001 |
| <b>bmi_2</b>     | -0.3354 | 0.0568 | 34.9232   | <.0001 |
| <b>bmi_3</b>     | -0.1846 | 0.0510 | 13.1017   | 0.0003 |
| <b>bmi_4</b>     | -0.0721 | 0.0464 | 2.4138    | 0.1203 |
| <b>bmi_5</b>     | 0.00871 | 0.0409 | 0.0455    | 0.8311 |
| <b>chl</b>       | 3.0685  | 0.0307 | 9986.0956 | <.0001 |
| <b>hbp</b>       | 0.5449  | 0.0259 | 442.7943  | <.0001 |

---

(BB) Logistic model to estimate the probability of taking aspirin less than daily (vs. no aspirin)

| <b>Parameter</b>     | <b>Log odds ratio</b> | <b>Standard error</b> | <b>Wald chi-square</b> | <b>P value</b> |
|----------------------|-----------------------|-----------------------|------------------------|----------------|
| <b>Intercept</b>     | -0.0569               | 0.1934                | 0.0867                 | 0.7685         |
| <b>fhx</b>           | 0.0123                | 0.00875               | 1.9907                 | 0.1583         |
| <b>smkhx</b>         | 0.0376                | 0.00820               | 20.9838                | <.0001         |
| <b>ochx</b>          | 0.0197                | 0.00749               | 6.9298                 | 0.0085         |
| <b>employed_1</b>    | -0.0318               | 0.0138                | 5.2826                 | 0.0215         |
| <b>employed_2</b>    | -0.0149               | 0.0219                | 0.4624                 | 0.4965         |
| <b>employed_3</b>    | -0.00900              | 0.0112                | 0.6497                 | 0.4202         |
| <b>employed_4</b>    | -0.00697              | 0.0145                | 0.2300                 | 0.6315         |
| <b>employed_5</b>    | -0.0139               | 0.0103                | 1.8173                 | 0.1776         |
| <b>employed_6</b>    | -0.0127               | 0.0153                | 0.6903                 | 0.4061         |
| <b>employed_miss</b> | 0.0146                | 0.0490                | 0.0888                 | 0.7657         |
| <b>mar80</b>         | -0.0146               | 0.0131                | 1.2476                 | 0.2640         |
| <b>college</b>       | 0.00934               | 0.00793               | 1.3883                 | 0.2387         |
| <b>stress82</b>      | 0.0158                | 0.00826               | 3.6452                 | 0.0562         |
| <b>stress82_miss</b> | 0.0172                | 0.0455                | 0.1423                 | 0.7060         |
| <b>hhighsch</b>      | -0.0296               | 0.00960               | 9.4778                 | 0.0021         |
| <b>hcollege</b>      | -0.0461               | 0.0104                | 19.6239                | <.0001         |
| <b>hgradsch</b>      | -0.0451               | 0.0110                | 16.7837                | <.0001         |
| <b>lbmi18_2</b>      | 0.0177                | 0.00878               | 4.0539                 | 0.0441         |
| <b>lbmi18_3</b>      | 0.0444                | 0.0141                | 9.9372                 | 0.0016         |
| <b>lbmi18_4</b>      | 0.0764                | 0.0333                | 5.2532                 | 0.0219         |
| <b>baseage</b>       | -0.0788               | 0.00746               | 111.6285               | <.0001         |
| <b>baseage_sq</b>    | 0.000728              | 0.000074              | 97.9292                | <.0001         |
| <b>bmi80_1</b>       | -0.00750              | 0.0494                | 0.0230                 | 0.8794         |
| <b>bmi80_2</b>       | -0.0127               | 0.0332                | 0.1460                 | 0.7024         |
| <b>bmi80_3</b>       | -0.00249              | 0.0316                | 0.0062                 | 0.9373         |
| <b>bmi80_4</b>       | 0.00272               | 0.0301                | 0.0082                 | 0.9279         |
| <b>bmi80_5</b>       | -0.0138               | 0.0288                | 0.2290                 | 0.6323         |
| <b>act80_1</b>       | 0.0131                | 0.0101                | 1.6722                 | 0.1960         |
| <b>act80_2</b>       | 0.0205                | 0.0118                | 3.0124                 | 0.0826         |
| <b>act80_3</b>       | 0.0145                | 0.0105                | 1.9001                 | 0.1681         |
| <b>alc80_1</b>       | -0.0448               | 0.0121                | 13.6398                | 0.0002         |

|                    |          |         |          |        |
|--------------------|----------|---------|----------|--------|
| <b>alc80_2</b>     | -0.0289  | 0.0115  | 6.2949   | 0.0121 |
| <b>alc80_3</b>     | -0.0327  | 0.0128  | 6.5559   | 0.0105 |
| <b>rpmeats80_1</b> | 0.0482   | 0.0201  | 5.7437   | 0.0165 |
| <b>rpmeats80_2</b> | 0.0143   | 0.0125  | 1.2995   | 0.2543 |
| <b>rpmeats80_3</b> | -0.0288  | 0.0107  | 7.2854   | 0.0070 |
| <b>rpmeats80_4</b> | 0.00426  | 0.00959 | 0.1970   | 0.6571 |
| <b>coff80_1</b>    | 0.0238   | 0.0103  | 5.3501   | 0.0207 |
| <b>coff80_2</b>    | -0.00514 | 0.0146  | 0.1246   | 0.7241 |
| <b>coff80_3</b>    | -0.0191  | 0.0225  | 0.7146   | 0.3979 |
| <b>whgrn80_1</b>   | -0.0319  | 0.0103  | 9.5461   | 0.0020 |
| <b>whgrn80_2</b>   | -0.0302  | 0.0110  | 7.6097   | 0.0058 |
| <b>soda80_1</b>    | -0.00994 | 0.0132  | 0.5639   | 0.4527 |
| <b>soda80_2</b>    | -0.0167  | 0.0116  | 2.0705   | 0.1502 |
| <b>soda80_3</b>    | -0.0351  | 0.0114  | 9.3770   | 0.0022 |
| <b>soda80_4</b>    | -0.00954 | 0.0110  | 0.7552   | 0.3848 |
| <b>cig80_1</b>     | 0.00875  | 0.0295  | 0.0878   | 0.7670 |
| <b>cig80_2</b>     | -0.0176  | 0.0367  | 0.2313   | 0.6306 |
| <b>cig80_3</b>     | -0.00956 | 0.0321  | 0.0886   | 0.7659 |
| <b>cig80_4</b>     | -0.00336 | 0.0284  | 0.0140   | 0.9058 |
| <b>period_2</b>    | -0.9704  | 0.0551  | 310.2518 | <.0001 |
| <b>period_3</b>    | -0.3539  | 0.0444  | 63.5030  | <.0001 |
| <b>period_4</b>    | 0.1799   | 0.0338  | 28.3028  | <.0001 |
| <b>period_5</b>    | -0.1523  | 0.0435  | 12.2468  | 0.0005 |
| <b>period_6</b>    | 0.0354   | 0.0194  | 3.3239   | 0.0683 |
| <b>period_7</b>    | -0.4495  | 0.0391  | 132.2054 | <.0001 |
| <b>period_8</b>    | -0.2153  | 0.0187  | 133.1534 | <.0001 |
| <b>period_9</b>    | 0.8138   | 0.0392  | 430.0024 | <.0001 |
| <b>period_10</b>   | 0.0354   | 0.0181  | 3.8154   | 0.0508 |
| <b>period_11</b>   | -0.0787  | 0.0392  | 4.0404   | 0.0444 |
| <b>mnp_l2</b>      | -0.0271  | 0.0158  | 2.9510   | 0.0858 |
| <b>mnp_l1</b>      | -0.0459  | 0.0205  | 5.0062   | 0.0253 |
| <b>pmh_l2</b>      | 0.00261  | 0.0115  | 0.0518   | 0.8199 |
| <b>pmh_l1</b>      | -0.00626 | 0.0128  | 0.2387   | 0.6251 |
| <b>ost_l2</b>      | 0.0266   | 0.0235  | 1.2735   | 0.2591 |
| <b>ost_l1</b>      | -0.0389  | 0.0285  | 1.8674   | 0.1718 |

|                        |          |         |        |        |
|------------------------|----------|---------|--------|--------|
| <b>rpmeats_l1_1</b>    | 0.0649   | 0.0455  | 2.0345 | 0.1538 |
| <b>rpmeats_l1_1_ti</b> | -0.0671  | 0.0239  | 7.9129 | 0.0049 |
| <b>rpmeats_l1_2</b>    | -0.00435 | 0.0358  | 0.0148 | 0.9032 |
| <b>rpmeats_l1_2_ti</b> | -0.0269  | 0.0195  | 1.9081 | 0.1672 |
| <b>rpmeats_l1_3</b>    | -0.0712  | 0.0340  | 4.3857 | 0.0362 |
| <b>rpmeats_l1_3_ti</b> | 0.0167   | 0.0187  | 0.7939 | 0.3729 |
| <b>rpmeats_l1_4</b>    | -0.0384  | 0.0290  | 1.7548 | 0.1853 |
| <b>rpmeats_l1_4_ti</b> | 0.00608  | 0.0165  | 0.1354 | 0.7129 |
| <b>coff_l1_1</b>       | 0.0538   | 0.0387  | 1.9344 | 0.1643 |
| <b>coff_l1_1_ti</b>    | -0.0435  | 0.0191  | 5.1887 | 0.0227 |
| <b>coff_l1_2</b>       | 0.0582   | 0.0473  | 1.5147 | 0.2184 |
| <b>coff_l1_2_ti</b>    | -0.0385  | 0.0249  | 2.3847 | 0.1225 |
| <b>coff_l1_3</b>       | 0.0441   | 0.0548  | 0.6489 | 0.4205 |
| <b>coff_l1_3_ti</b>    | -0.00706 | 0.0296  | 0.0569 | 0.8114 |
| <b>coff_l1_4</b>       | 0.0737   | 0.0252  | 8.5899 | 0.0034 |
| <b>coff_l1_4_ti</b>    | -0.0257  | 0.0135  | 3.6166 | 0.0572 |
| <b>whgrn_l1_1</b>      | 0.0507   | 0.0376  | 1.8209 | 0.1772 |
| <b>whgrn_l1_1_ti</b>   | -0.0239  | 0.0201  | 1.4192 | 0.2335 |
| <b>whgrn_l1_2</b>      | 0.00419  | 0.0375  | 0.0125 | 0.9110 |
| <b>whgrn_l1_2_ti</b>   | -0.00879 | 0.0202  | 0.1900 | 0.6629 |
| <b>whgrn_l1_3</b>      | -0.0406  | 0.0392  | 1.0731 | 0.3002 |
| <b>whgrn_l1_3_ti</b>   | 0.0275   | 0.0210  | 1.7149 | 0.1904 |
| <b>whgrn_l1_4</b>      | 0.0110   | 0.0399  | 0.0763 | 0.7823 |
| <b>whgrn_l1_4_ti</b>   | -0.00437 | 0.0213  | 0.0419 | 0.8378 |
| <b>soda_l1_1</b>       | 0.0728   | 0.0329  | 4.8874 | 0.0271 |
| <b>soda_l1_1_ti</b>    | -0.0301  | 0.0110  | 7.5033 | 0.0062 |
| <b>soda_l1_2</b>       | 0.0299   | 0.0271  | 1.2167 | 0.2700 |
| <b>soda_l1_2_ti</b>    | -0.0145  | 0.00900 | 2.5905 | 0.1075 |
| <b>soda_l1_3</b>       | 0.0395   | 0.0264  | 2.2375 | 0.1347 |
| <b>soda_l1_3_ti</b>    | -0.0248  | 0.00905 | 7.5373 | 0.0060 |
| <b>soda_l1_4</b>       | 0.0273   | 0.0260  | 1.1060 | 0.2930 |
| <b>soda_l1_4_ti</b>    | -0.0116  | 0.00928 | 1.5572 | 0.2121 |
| <b>cal_l1_1</b>        | 0.0764   | 0.0408  | 3.5141 | 0.0609 |
| <b>cal_l1_1_ti</b>     | -0.0273  | 0.0217  | 1.5867 | 0.2078 |
| <b>cal_l1_2</b>        | 0.0361   | 0.0372  | 0.9445 | 0.3311 |

|                    |          |         |         |        |
|--------------------|----------|---------|---------|--------|
| <b>cal_l1_2_ti</b> | -0.00047 | 0.0200  | 0.0006  | 0.9810 |
| <b>cal_l1_3</b>    | 0.0102   | 0.0356  | 0.0823  | 0.7742 |
| <b>cal_l1_3_ti</b> | 0.0143   | 0.0193  | 0.5501  | 0.4583 |
| <b>cal_l1_4</b>    | -0.00097 | 0.0344  | 0.0008  | 0.9774 |
| <b>cal_l1_4_ti</b> | 0.00448  | 0.0188  | 0.0569  | 0.8115 |
| <b>alc_l1_1</b>    | -0.0635  | 0.0337  | 3.5444  | 0.0597 |
| <b>alc_l1_1_ti</b> | -0.00132 | 0.0157  | 0.0071  | 0.9330 |
| <b>alc_l1_2</b>    | -0.0955  | 0.0333  | 8.2128  | 0.0042 |
| <b>alc_l1_2_ti</b> | 0.0271   | 0.0167  | 2.6167  | 0.1057 |
| <b>alc_l1_3</b>    | -0.1026  | 0.0393  | 6.8033  | 0.0091 |
| <b>alc_l1_3_ti</b> | 0.0362   | 0.0212  | 2.9091  | 0.0881 |
| <b>cig_l2_1</b>    | -0.0761  | 0.0476  | 2.5552  | 0.1099 |
| <b>cig_l1_1</b>    | 0.0618   | 0.0544  | 1.2921  | 0.2557 |
| <b>cig_l2_2</b>    | -0.0366  | 0.0552  | 0.4406  | 0.5068 |
| <b>cig_l1_2</b>    | 0.0710   | 0.0615  | 1.3329  | 0.2483 |
| <b>cig_l2_3</b>    | -0.00862 | 0.0487  | 0.0314  | 0.8594 |
| <b>cig_l1_3</b>    | 0.0246   | 0.0544  | 0.2052  | 0.6505 |
| <b>cig_l2_4</b>    | -0.00870 | 0.0430  | 0.0409  | 0.8397 |
| <b>cig_l1_4</b>    | 0.0162   | 0.0482  | 0.1129  | 0.7369 |
| <b>mvi_l2</b>      | -0.00566 | 0.00777 | 0.5309  | 0.4662 |
| <b>mvi_l1</b>      | -0.00819 | 0.00826 | 0.9828  | 0.3215 |
| <b>act_l1_1</b>    | 0.0452   | 0.0149  | 9.1693  | 0.0025 |
| <b>act_l1_1_ti</b> | -0.0399  | 0.0124  | 10.3982 | 0.0013 |
| <b>act_l1_2</b>    | 0.0335   | 0.0161  | 4.3270  | 0.0375 |
| <b>act_l1_2_ti</b> | -0.0443  | 0.0146  | 9.1557  | 0.0025 |
| <b>act_l1_3</b>    | 0.00654  | 0.0268  | 0.0597  | 0.8069 |
| <b>act_l1_3_ti</b> | -0.0144  | 0.0294  | 0.2422  | 0.6226 |
| <b>act_l1_4</b>    | 0.0150   | 0.0175  | 0.7334  | 0.3918 |
| <b>act_l1_4_ti</b> | -0.0320  | 0.0151  | 4.4957  | 0.0340 |
| <b>act_l1_5</b>    | 0.0168   | 0.0278  | 0.3679  | 0.5442 |
| <b>act_l1_5_ti</b> | -0.0640  | 0.0330  | 3.7509  | 0.0528 |
| <b>can_l2</b>      | -0.1087  | 0.0320  | 11.5536 | 0.0007 |
| <b>can_l1</b>      | -0.2351  | 0.0375  | 39.3057 | <.0001 |
| <b>bmi_l2_1</b>    | -0.1908  | 0.0614  | 9.6483  | 0.0019 |
| <b>bmi_l1_1</b>    | -0.1323  | 0.0642  | 4.2478  | 0.0393 |

|                     |         |        |            |        |
|---------------------|---------|--------|------------|--------|
| <b>bmi_l2_2</b>     | -0.1273 | 0.0373 | 11.6260    | 0.0007 |
| <b>bmi_l1_2</b>     | -0.1145 | 0.0393 | 8.5078     | 0.0035 |
| <b>bmi_l2_3</b>     | -0.1099 | 0.0346 | 10.0930    | 0.0015 |
| <b>bmi_l1_3</b>     | -0.1109 | 0.0363 | 9.3358     | 0.0022 |
| <b>bmi_l2_4</b>     | -0.0785 | 0.0320 | 6.0098     | 0.0142 |
| <b>bmi_l1_4</b>     | -0.0793 | 0.0336 | 5.5829     | 0.0181 |
| <b>bmi_l2_5</b>     | -0.0632 | 0.0281 | 5.0540     | 0.0246 |
| <b>bmi_l1_5</b>     | -0.0463 | 0.0292 | 2.5216     | 0.1123 |
| <b>chl_l2</b>       | 0.0122  | 0.0156 | 0.6054     | 0.4365 |
| <b>chl_l1</b>       | 0.0111  | 0.0197 | 0.3192     | 0.5721 |
| <b>hbp_l2</b>       | 0.0378  | 0.0185 | 4.1817     | 0.0409 |
| <b>hbp_l1</b>       | 0.1229  | 0.0243 | 25.4923    | <.0001 |
| <b>sta_l1</b>       | 0.4678  | 0.0176 | 703.6068   | <.0001 |
| <b>sta_l1_ti</b>    | -0.0838 | 0.0203 | 17.1276    | <.0001 |
| <b>asn_l2_1</b>     | 0.8914  | 0.0121 | 5422.1491  | <.0001 |
| <b>asn_l1_1</b>     | 3.0994  | 0.0119 | 67516.5959 | <.0001 |
| <b>asn_l2_2</b>     | 0.2668  | 0.0121 | 483.0398   | <.0001 |
| <b>asn_l1_2</b>     | 0.5432  | 0.0120 | 2065.1702  | <.0001 |
| <b>angcbg_l2</b>    | 0.2183  | 0.0486 | 20.1657    | <.0001 |
| <b>angcbg_l1</b>    | -0.3739 | 0.0440 | 72.0668    | <.0001 |
| <b>str_l2</b>       | 0.1985  | 0.0981 | 4.0942     | 0.0430 |
| <b>str_l1</b>       | 0.0364  | 0.0818 | 0.1979     | 0.6564 |
| <b>mi_l2</b>        | 0.3700  | 0.1204 | 9.4465     | 0.0021 |
| <b>mi_l1</b>        | -0.4941 | 0.1052 | 22.0720    | <.0001 |
| <b>mnp</b>          | 0.0637  | 0.0174 | 13.3734    | 0.0003 |
| <b>pmh</b>          | -0.0281 | 0.0110 | 6.5499     | 0.0105 |
| <b>ost</b>          | 0.0850  | 0.0201 | 17.8514    | <.0001 |
| <b>rpmeats_1</b>    | 0.1212  | 0.0202 | 35.9838    | <.0001 |
| <b>rpmeats_1_ti</b> | -0.1207 | 0.0242 | 24.8573    | <.0001 |
| <b>rpmeats_2</b>    | 0.0787  | 0.0178 | 19.5164    | <.0001 |
| <b>rpmeats_2_ti</b> | -0.0721 | 0.0200 | 12.9561    | 0.0003 |
| <b>rpmeats_3</b>    | 0.0716  | 0.0170 | 17.7178    | <.0001 |
| <b>rpmeats_3_ti</b> | -0.0214 | 0.0195 | 1.2124     | 0.2709 |
| <b>rpmeats_4</b>    | 0.0661  | 0.0160 | 16.9897    | <.0001 |
| <b>rpmeats_4_ti</b> | -0.0184 | 0.0174 | 1.1178     | 0.2904 |



|                   |          |         |          |        |
|-------------------|----------|---------|----------|--------|
| <b>coff_1</b>     | 0.1258   | 0.0251  | 25.2141  | <.0001 |
| <b>coff_1_ti</b>  | -0.0424  | 0.0193  | 4.8140   | 0.0282 |
| <b>coff_2</b>     | 0.1032   | 0.0222  | 21.6904  | <.0001 |
| <b>coff_2_ti</b>  | -0.0229  | 0.0254  | 0.8173   | 0.3660 |
| <b>coff_3</b>     | 0.00450  | 0.0239  | 0.0356   | 0.8504 |
| <b>coff_3_ti</b>  | 0.0162   | 0.0304  | 0.2821   | 0.5953 |
| <b>coff_4</b>     | 0.0134   | 0.0129  | 1.0817   | 0.2983 |
| <b>coff_4_ti</b>  | -0.0236  | 0.0138  | 2.9194   | 0.0875 |
| <b>whgrn_1</b>    | 0.0168   | 0.0185  | 0.8227   | 0.3644 |
| <b>whgrn_1_ti</b> | 0.00734  | 0.0205  | 0.1284   | 0.7201 |
| <b>whgrn_2</b>    | -0.00873 | 0.0165  | 0.2780   | 0.5980 |
| <b>whgrn_2_ti</b> | 0.00773  | 0.0207  | 0.1398   | 0.7085 |
| <b>whgrn_3</b>    | -0.00295 | 0.0156  | 0.0359   | 0.8498 |
| <b>whgrn_3_ti</b> | 0.0210   | 0.0215  | 0.9523   | 0.3291 |
| <b>whgrn_4</b>    | -0.0465  | 0.0147  | 9.9346   | 0.0016 |
| <b>whgrn_4_ti</b> | 0.0181   | 0.0219  | 0.6793   | 0.4098 |
| <b>soda_1</b>     | 0.0114   | 0.0227  | 0.2532   | 0.6149 |
| <b>soda_1_ti</b>  | -0.00350 | 0.0115  | 0.0925   | 0.7611 |
| <b>soda_2</b>     | 0.000117 | 0.0190  | 0.0000   | 0.9951 |
| <b>soda_2_ti</b>  | -0.0117  | 0.00950 | 1.5142   | 0.2185 |
| <b>soda_3</b>     | -0.0128  | 0.0181  | 0.5046   | 0.4775 |
| <b>soda_3_ti</b>  | -0.0102  | 0.00959 | 1.1335   | 0.2870 |
| <b>soda_4</b>     | -0.00601 | 0.0172  | 0.1213   | 0.7276 |
| <b>soda_4_ti</b>  | -0.00416 | 0.00988 | 0.1774   | 0.6736 |
| <b>cal_1</b>      | 0.0263   | 0.0207  | 1.6148   | 0.2038 |
| <b>cal_1_ti</b>   | -0.0311  | 0.0220  | 1.9965   | 0.1577 |
| <b>cal_2</b>      | 0.0133   | 0.0182  | 0.5341   | 0.4649 |
| <b>cal_2_ti</b>   | 0.00388  | 0.0204  | 0.0361   | 0.8494 |
| <b>cal_3</b>      | 0.0149   | 0.0167  | 0.7916   | 0.3736 |
| <b>cal_3_ti</b>   | 0.00828  | 0.0198  | 0.1739   | 0.6766 |
| <b>cal_4</b>      | 0.00472  | 0.0155  | 0.0928   | 0.7606 |
| <b>cal_4_ti</b>   | 0.00974  | 0.0195  | 0.2496   | 0.6173 |
| <b>alc_1</b>      | 0.2146   | 0.0213  | 101.9417 | <.0001 |
| <b>alc_1_ti</b>   | -0.0123  | 0.0159  | 0.6003   | 0.4385 |
| <b>alc_2</b>      | 0.1018   | 0.0193  | 27.8347  | <.0001 |

|                 |          |         |           |        |
|-----------------|----------|---------|-----------|--------|
| <b>alc_2_ti</b> | 0.0273   | 0.0170  | 2.5742    | 0.1086 |
| <b>alc_3</b>    | 0.0284   | 0.0195  | 2.1264    | 0.1448 |
| <b>alc_3_ti</b> | 0.0302   | 0.0219  | 1.9038    | 0.1677 |
| <b>cig_1</b>    | 0.0119   | 0.0531  | 0.0501    | 0.8229 |
| <b>cig_2</b>    | -0.0604  | 0.0608  | 0.9857    | 0.3208 |
| <b>cig_3</b>    | -0.0349  | 0.0543  | 0.4134    | 0.5203 |
| <b>cig_4</b>    | -0.00461 | 0.0493  | 0.0087    | 0.9256 |
| <b>mvi</b>      | -0.1678  | 0.00801 | 439.4033  | <.0001 |
| <b>act_1</b>    | 0.1214   | 0.0134  | 82.1154   | <.0001 |
| <b>act_1_ti</b> | -0.0737  | 0.0158  | 21.8822   | <.0001 |
| <b>act_2</b>    | 0.0660   | 0.0143  | 21.2805   | <.0001 |
| <b>act_2_ti</b> | -0.0474  | 0.0185  | 6.5687    | 0.0104 |
| <b>act_3</b>    | 0.0458   | 0.0238  | 3.6897    | 0.0547 |
| <b>act_3_ti</b> | -0.0130  | 0.0320  | 0.1658    | 0.6839 |
| <b>act_4</b>    | 0.0652   | 0.0154  | 17.8503   | <.0001 |
| <b>act_4_ti</b> | -0.0335  | 0.0217  | 2.3874    | 0.1223 |
| <b>act_5</b>    | 0.0382   | 0.0247  | 2.3861    | 0.1224 |
| <b>act_5_ti</b> | -0.0104  | 0.0343  | 0.0921    | 0.7615 |
| <b>can</b>      | 0.3845   | 0.0254  | 229.4293  | <.0001 |
| <b>bmi_1</b>    | 0.4863   | 0.0551  | 77.9731   | <.0001 |
| <b>bmi_2</b>    | 0.2669   | 0.0344  | 60.3165   | <.0001 |
| <b>bmi_3</b>    | 0.2119   | 0.0318  | 44.4994   | <.0001 |
| <b>bmi_4</b>    | 0.1391   | 0.0293  | 22.5485   | <.0001 |
| <b>bmi_5</b>    | 0.0903   | 0.0259  | 12.1814   | 0.0005 |
| <b>chl</b>      | -0.0334  | 0.0148  | 5.1088    | 0.0238 |
| <b>hbp</b>      | -0.2298  | 0.0178  | 167.1378  | <.0001 |
| <b>sta</b>      | -0.8691  | 0.0155  | 3164.2563 | <.0001 |
| <b>sta_ti</b>   | 0.1215   | 0.0198  | 37.6482   | <.0001 |

---

(CC) Logistic model to estimate the probability of taking aspirin daily (vs. no aspirin)

| <b>Variable</b>      | <b>Log odds ratio</b> | <b>Standard error</b> | <b>Wald chi-square</b> | <b>P value</b> |
|----------------------|-----------------------|-----------------------|------------------------|----------------|
| <b>Intercept</b>     | -1.5806               | 0.2663                | 35.2395                | <.0001         |
| <b>fhx</b>           | -0.0133               | 0.0116                | 1.2994                 | 0.2543         |
| <b>smkhx</b>         | -0.0417               | 0.0110                | 14.5018                | 0.0001         |
| <b>ochx</b>          | -0.0303               | 0.00999               | 9.1787                 | 0.0024         |
| <b>employed_1</b>    | 0.0370                | 0.0184                | 4.0603                 | 0.0439         |
| <b>employed_2</b>    | 0.0689                | 0.0299                | 5.3108                 | 0.0212         |
| <b>employed_3</b>    | 0.00812               | 0.0150                | 0.2938                 | 0.5878         |
| <b>employed_4</b>    | 0.0637                | 0.0195                | 10.6603                | 0.0011         |
| <b>employed_5</b>    | 0.0138                | 0.0138                | 1.0055                 | 0.3160         |
| <b>employed_6</b>    | 0.0529                | 0.0204                | 6.7169                 | 0.0096         |
| <b>employed_miss</b> | 0.0124                | 0.0668                | 0.0344                 | 0.8529         |
| <b>mar80</b>         | 0.0253                | 0.0175                | 2.0716                 | 0.1501         |
| <b>college</b>       | 0.0504                | 0.0107                | 22.3260                | <.0001         |
| <b>stress82</b>      | -0.0200               | 0.0111                | 3.2444                 | 0.0717         |
| <b>stress82_miss</b> | 0.0259                | 0.0619                | 0.1745                 | 0.6762         |
| <b>hhighsch</b>      | -0.0861               | 0.0131                | 43.2832                | <.0001         |
| <b>hcollege</b>      | -0.0644               | 0.0142                | 20.7259                | <.0001         |
| <b>hgradsch</b>      | -0.0729               | 0.0150                | 23.7997                | <.0001         |
| <b>lbmi18_2</b>      | -0.0250               | 0.0117                | 4.6066                 | 0.0318         |
| <b>lbmi18_3</b>      | -0.0945               | 0.0188                | 25.4024                | <.0001         |
| <b>lbmi18_4</b>      | -0.1786               | 0.0442                | 16.3009                | <.0001         |
| <b>baseage</b>       | -0.00323              | 0.0102                | 0.0991                 | 0.7529         |
| <b>baseage_sq</b>    | -0.00018              | 0.000100              | 3.0517                 | 0.0807         |
| <b>bmi80_1</b>       | 0.0371                | 0.0665                | 0.3119                 | 0.5765         |
| <b>bmi80_2</b>       | 0.0785                | 0.0438                | 3.2164                 | 0.0729         |
| <b>bmi80_3</b>       | 0.0704                | 0.0416                | 2.8583                 | 0.0909         |
| <b>bmi80_4</b>       | 0.0298                | 0.0396                | 0.5692                 | 0.4506         |
| <b>bmi80_5</b>       | -0.00248              | 0.0378                | 0.0043                 | 0.9477         |
| <b>act80_1</b>       | 0.00869               | 0.0134                | 0.4236                 | 0.5151         |
| <b>act80_2</b>       | 0.0742                | 0.0157                | 22.3801                | <.0001         |
| <b>act80_3</b>       | 0.0305                | 0.0138                | 4.9198                 | 0.0266         |
| <b>alc80_1</b>       | 0.0117                | 0.0160                | 0.5320                 | 0.4658         |

|                    |          |        |          |        |
|--------------------|----------|--------|----------|--------|
| <b>alc80_2</b>     | 0.0334   | 0.0152 | 4.8469   | 0.0277 |
| <b>alc80_3</b>     | 0.0328   | 0.0168 | 3.8163   | 0.0508 |
| <b>rpmeats80_1</b> | 0.0534   | 0.0271 | 3.8662   | 0.0493 |
| <b>rpmeats80_2</b> | 0.0114   | 0.0168 | 0.4624   | 0.4965 |
| <b>rpmeats80_3</b> | -0.00631 | 0.0141 | 0.1993   | 0.6553 |
| <b>rpmeats80_4</b> | -0.0181  | 0.0128 | 2.0026   | 0.1570 |
| <b>coff80_1</b>    | -0.0524  | 0.0138 | 14.4545  | 0.0001 |
| <b>coff80_2</b>    | 0.0172   | 0.0197 | 0.7692   | 0.3805 |
| <b>coff80_3</b>    | 0.0851   | 0.0305 | 7.7934   | 0.0052 |
| <b>whgrn80_1</b>   | -0.0167  | 0.0137 | 1.4760   | 0.2244 |
| <b>whgrn80_2</b>   | 0.0219   | 0.0145 | 2.2660   | 0.1322 |
| <b>soda80_1</b>    | 0.0409   | 0.0176 | 5.3885   | 0.0203 |
| <b>soda80_2</b>    | 0.0611   | 0.0156 | 15.4468  | <.0001 |
| <b>soda80_3</b>    | 0.0587   | 0.0153 | 14.7299  | 0.0001 |
| <b>soda80_4</b>    | 0.00674  | 0.0147 | 0.2110   | 0.6460 |
| <b>cig80_1</b>     | 0.0520   | 0.0387 | 1.8072   | 0.1788 |
| <b>cig80_2</b>     | 0.1359   | 0.0484 | 7.8911   | 0.0050 |
| <b>cig80_3</b>     | 0.0305   | 0.0421 | 0.5251   | 0.4687 |
| <b>cig80_4</b>     | -0.0104  | 0.0373 | 0.0782   | 0.7797 |
| <b>period_2</b>    | 1.5310   | 0.0760 | 405.8091 | <.0001 |
| <b>period_3</b>    | 1.2986   | 0.0594 | 478.3258 | <.0001 |
| <b>period_4</b>    | 1.2608   | 0.0490 | 662.6079 | <.0001 |
| <b>period_5</b>    | 0.8967   | 0.0581 | 238.2128 | <.0001 |
| <b>period_6</b>    | -0.6857  | 0.0252 | 737.9062 | <.0001 |
| <b>period_7</b>    | 1.0329   | 0.0514 | 403.8254 | <.0001 |
| <b>period_8</b>    | 0.5685   | 0.0236 | 578.2913 | <.0001 |
| <b>period_9</b>    | 0.7634   | 0.0524 | 212.1721 | <.0001 |
| <b>period_10</b>   | 0.2805   | 0.0234 | 143.8430 | <.0001 |
| <b>period_11</b>   | -0.1548  | 0.0519 | 8.9084   | 0.0028 |
| <b>mnp_l2</b>      | -0.0120  | 0.0215 | 0.3085   | 0.5786 |
| <b>mnp_l1</b>      | -0.00119 | 0.0287 | 0.0017   | 0.9670 |
| <b>pmh_l2</b>      | -0.0546  | 0.0148 | 13.6054  | 0.0002 |
| <b>pmh_l1</b>      | -0.0293  | 0.0167 | 3.0967   | 0.0785 |
| <b>ost_l2</b>      | -0.0182  | 0.0302 | 0.3649   | 0.5458 |
| <b>ost_l1</b>      | 0.0750   | 0.0366 | 4.2072   | 0.0403 |

|                        |          |        |        |        |
|------------------------|----------|--------|--------|--------|
| <b>rpmeats_l1_1</b>    | 0.0263   | 0.0684 | 0.1481 | 0.7004 |
| <b>rpmeats_l1_1_ti</b> | -0.00505 | 0.0355 | 0.0202 | 0.8869 |
| <b>rpmeats_l1_2</b>    | -0.00682 | 0.0525 | 0.0169 | 0.8967 |
| <b>rpmeats_l1_2_ti</b> | -0.00352 | 0.0282 | 0.0156 | 0.9005 |
| <b>rpmeats_l1_3</b>    | -0.00195 | 0.0492 | 0.0016 | 0.9683 |
| <b>rpmeats_l1_3_ti</b> | 0.00315  | 0.0267 | 0.0138 | 0.9064 |
| <b>rpmeats_l1_4</b>    | 0.0141   | 0.0427 | 0.1089 | 0.7414 |
| <b>rpmeats_l1_4_ti</b> | -0.00908 | 0.0239 | 0.1446 | 0.7037 |
| <b>coff_l1_1</b>       | -0.0962  | 0.0574 | 2.8085 | 0.0938 |
| <b>coff_l1_1_ti</b>    | 0.0591   | 0.0282 | 4.3994 | 0.0360 |
| <b>coff_l1_2</b>       | -0.1265  | 0.0693 | 3.3310 | 0.0680 |
| <b>coff_l1_2_ti</b>    | 0.0775   | 0.0362 | 4.5855 | 0.0322 |
| <b>coff_l1_3</b>       | -0.0900  | 0.0806 | 1.2454 | 0.2644 |
| <b>coff_l1_3_ti</b>    | 0.0881   | 0.0429 | 4.2155 | 0.0401 |
| <b>coff_l1_4</b>       | -0.0494  | 0.0364 | 1.8373 | 0.1753 |
| <b>coff_l1_4_ti</b>    | 0.0220   | 0.0193 | 1.2941 | 0.2553 |
| <b>whgrn_l1_1</b>      | 0.00155  | 0.0544 | 0.0008 | 0.9773 |
| <b>whgrn_l1_1_ti</b>   | 0.0119   | 0.0288 | 0.1709 | 0.6793 |
| <b>whgrn_l1_2</b>      | 0.00394  | 0.0542 | 0.0053 | 0.9420 |
| <b>whgrn_l1_2_ti</b>   | 0.0115   | 0.0288 | 0.1598 | 0.6894 |
| <b>whgrn_l1_3</b>      | -0.0197  | 0.0559 | 0.1239 | 0.7248 |
| <b>whgrn_l1_3_ti</b>   | 0.0124   | 0.0296 | 0.1763 | 0.6746 |
| <b>whgrn_l1_4</b>      | 0.0170   | 0.0575 | 0.0872 | 0.7677 |
| <b>whgrn_l1_4_ti</b>   | 0.00887  | 0.0304 | 0.0851 | 0.7704 |
| <b>soda_l1_1</b>       | 0.0996   | 0.0440 | 5.1171 | 0.0237 |
| <b>soda_l1_1_ti</b>    | -0.0195  | 0.0157 | 1.5311 | 0.2159 |
| <b>soda_l1_2</b>       | 0.0861   | 0.0363 | 5.6456 | 0.0175 |
| <b>soda_l1_2_ti</b>    | -0.0168  | 0.0130 | 1.6791 | 0.1950 |
| <b>soda_l1_3</b>       | 0.0633   | 0.0355 | 3.1683 | 0.0751 |
| <b>soda_l1_3_ti</b>    | -0.00436 | 0.0132 | 0.1100 | 0.7401 |
| <b>soda_l1_4</b>       | 0.0858   | 0.0348 | 6.0648 | 0.0138 |
| <b>soda_l1_4_ti</b>    | -0.0204  | 0.0133 | 2.3256 | 0.1273 |
| <b>cal_l1_1</b>        | -0.0556  | 0.0594 | 0.8762 | 0.3492 |
| <b>cal_l1_1_ti</b>     | 0.0311   | 0.0313 | 0.9908 | 0.3196 |
| <b>cal_l1_2</b>        | 0.0421   | 0.0546 | 0.5937 | 0.4410 |

|                    |          |        |         |        |
|--------------------|----------|--------|---------|--------|
| <b>cal_l1_2_ti</b> | -0.0343  | 0.0290 | 1.3986  | 0.2370 |
| <b>cal_l1_3</b>    | -0.00768 | 0.0515 | 0.0222  | 0.8816 |
| <b>cal_l1_3_ti</b> | -0.0101  | 0.0276 | 0.1355  | 0.7128 |
| <b>cal_l1_4</b>    | 0.0339   | 0.0500 | 0.4601  | 0.4976 |
| <b>cal_l1_4_ti</b> | -0.00541 | 0.0269 | 0.0404  | 0.8408 |
| <b>alc_l1_1</b>    | 0.0420   | 0.0472 | 0.7916  | 0.3736 |
| <b>alc_l1_1_ti</b> | -0.0432  | 0.0221 | 3.8069  | 0.0510 |
| <b>alc_l1_2</b>    | 0.1100   | 0.0473 | 5.4152  | 0.0200 |
| <b>alc_l1_2_ti</b> | -0.0544  | 0.0237 | 5.2721  | 0.0217 |
| <b>alc_l1_3</b>    | 0.1117   | 0.0562 | 3.9495  | 0.0469 |
| <b>alc_l1_3_ti</b> | -0.0608  | 0.0299 | 4.1338  | 0.0420 |
| <b>cig_l2_1</b>    | 0.1533   | 0.0641 | 5.7163  | 0.0168 |
| <b>cig_l1_1</b>    | 0.2044   | 0.0728 | 7.8886  | 0.0050 |
| <b>cig_l2_2</b>    | 0.2090   | 0.0745 | 7.8623  | 0.0050 |
| <b>cig_l1_2</b>    | 0.1050   | 0.0824 | 1.6241  | 0.2025 |
| <b>cig_l2_3</b>    | 0.1136   | 0.0654 | 3.0207  | 0.0822 |
| <b>cig_l1_3</b>    | 0.1301   | 0.0727 | 3.2022  | 0.0735 |
| <b>cig_l2_4</b>    | 0.0784   | 0.0578 | 1.8396  | 0.1750 |
| <b>cig_l1_4</b>    | 0.1088   | 0.0646 | 2.8360  | 0.0922 |
| <b>mvi_l2</b>      | -0.0128  | 0.0106 | 1.4551  | 0.2277 |
| <b>mvi_l1</b>      | -0.0381  | 0.0113 | 11.4078 | 0.0007 |
| <b>act_l1_1</b>    | -0.0396  | 0.0189 | 4.3903  | 0.0361 |
| <b>act_l1_1_ti</b> | 0.0316   | 0.0171 | 3.4367  | 0.0638 |
| <b>act_l1_2</b>    | -0.0158  | 0.0204 | 0.6038  | 0.4371 |
| <b>act_l1_2_ti</b> | 0.0265   | 0.0204 | 1.6897  | 0.1936 |
| <b>act_l1_3</b>    | 0.00348  | 0.0340 | 0.0105  | 0.9184 |
| <b>act_l1_3_ti</b> | -0.0388  | 0.0412 | 0.8873  | 0.3462 |
| <b>act_l1_4</b>    | -0.0299  | 0.0220 | 1.8348  | 0.1756 |
| <b>act_l1_4_ti</b> | 0.0291   | 0.0208 | 1.9475  | 0.1629 |
| <b>act_l1_5</b>    | -0.0184  | 0.0350 | 0.2777  | 0.5982 |
| <b>act_l1_5_ti</b> | 0.0598   | 0.0460 | 1.6891  | 0.1937 |
| <b>can_l2</b>      | 0.0356   | 0.0430 | 0.6869  | 0.4072 |
| <b>can_l1</b>      | -0.1415  | 0.0517 | 7.4862  | 0.0062 |
| <b>bmi_l2_1</b>    | 0.0672   | 0.0835 | 0.6478  | 0.4209 |
| <b>bmi_l1_1</b>    | 0.0309   | 0.0875 | 0.1250  | 0.7237 |

|                     |          |        |            |        |
|---------------------|----------|--------|------------|--------|
| <b>bmi_l2_2</b>     | 0.0743   | 0.0499 | 2.2207     | 0.1362 |
| <b>bmi_l1_2</b>     | -0.00406 | 0.0527 | 0.0059     | 0.9386 |
| <b>bmi_l2_3</b>     | 0.0780   | 0.0460 | 2.8716     | 0.0902 |
| <b>bmi_l1_3</b>     | 0.0151   | 0.0484 | 0.0968     | 0.7557 |
| <b>bmi_l2_4</b>     | 0.0774   | 0.0425 | 3.3130     | 0.0687 |
| <b>bmi_l1_4</b>     | -0.0137  | 0.0447 | 0.0944     | 0.7587 |
| <b>bmi_l2_5</b>     | 0.0771   | 0.0374 | 4.2635     | 0.0389 |
| <b>bmi_l1_5</b>     | 0.00180  | 0.0389 | 0.0021     | 0.9630 |
| <b>chl_l2</b>       | 0.0718   | 0.0203 | 12.4753    | 0.0004 |
| <b>chl_l1</b>       | -0.0214  | 0.0260 | 0.6767     | 0.4107 |
| <b>hbp_l2</b>       | 0.0439   | 0.0231 | 3.6101     | 0.0574 |
| <b>hbp_l1</b>       | 0.0697   | 0.0301 | 5.3550     | 0.0207 |
| <b>sta_l1</b>       | 0.1500   | 0.0215 | 48.6458    | <.0001 |
| <b>sta_l1_ti</b>    | -0.0629  | 0.0247 | 6.4748     | 0.0109 |
| <b>asn_l2_1</b>     | 0.5487   | 0.0141 | 1513.7902  | <.0001 |
| <b>asn_l1_1</b>     | 1.3546   | 0.0147 | 8461.5456  | <.0001 |
| <b>asn_l2_2</b>     | 0.8145   | 0.0122 | 4441.9003  | <.0001 |
| <b>asn_l1_2</b>     | 2.3001   | 0.0116 | 39035.9918 | <.0001 |
| <b>angcbg_l2</b>    | 0.4817   | 0.0538 | 80.0380    | <.0001 |
| <b>angcbg_l1</b>    | -0.5611  | 0.0484 | 134.1481   | <.0001 |
| <b>str_l2</b>       | 0.4797   | 0.1323 | 13.1496    | 0.0003 |
| <b>str_l1</b>       | -0.6162  | 0.1119 | 30.3289    | <.0001 |
| <b>mi_l2</b>        | 0.4898   | 0.1325 | 13.6559    | 0.0002 |
| <b>mi_l1</b>        | -0.8390  | 0.1164 | 51.9265    | <.0001 |
| <b>mnp</b>          | -0.1485  | 0.0253 | 34.5240    | <.0001 |
| <b>pmh</b>          | -0.0253  | 0.0144 | 3.0760     | 0.0795 |
| <b>ost</b>          | -0.1372  | 0.0259 | 28.0592    | <.0001 |
| <b>rpmeats_1</b>    | -0.1095  | 0.0270 | 16.3986    | <.0001 |
| <b>rpmeats_1_ti</b> | 0.0311   | 0.0360 | 0.7473     | 0.3873 |
| <b>rpmeats_2</b>    | -0.0483  | 0.0240 | 4.0585     | 0.0439 |
| <b>rpmeats_2_ti</b> | 0.0222   | 0.0290 | 0.5873     | 0.4434 |
| <b>rpmeats_3</b>    | -0.0473  | 0.0230 | 4.2420     | 0.0394 |
| <b>rpmeats_3_ti</b> | 0.0344   | 0.0278 | 1.5355     | 0.2153 |
| <b>rpmeats_4</b>    | 0.00113  | 0.0220 | 0.0026     | 0.9591 |
| <b>rpmeats_4_ti</b> | 0.0111   | 0.0252 | 0.1926     | 0.6608 |

|                   |          |        |         |        |
|-------------------|----------|--------|---------|--------|
| <b>coff_1</b>     | -0.0521  | 0.0344 | 2.2866  | 0.1305 |
| <b>coff_1_ti</b>  | 0.0680   | 0.0285 | 5.6832  | 0.0171 |
| <b>coff_2</b>     | -0.0273  | 0.0297 | 0.8393  | 0.3596 |
| <b>coff_2_ti</b>  | 0.0745   | 0.0369 | 4.0842  | 0.0433 |
| <b>coff_3</b>     | 0.0220   | 0.0312 | 0.4970  | 0.4808 |
| <b>coff_3_ti</b>  | 0.0967   | 0.0441 | 4.8069  | 0.0283 |
| <b>coff_4</b>     | 0.00571  | 0.0171 | 0.1111  | 0.7389 |
| <b>coff_4_ti</b>  | 0.0201   | 0.0198 | 1.0361  | 0.3087 |
| <b>whgrn_1</b>    | 0.0709   | 0.0249 | 8.1091  | 0.0044 |
| <b>whgrn_1_ti</b> | -0.0231  | 0.0294 | 0.6161  | 0.4325 |
| <b>whgrn_2</b>    | 0.0826   | 0.0221 | 13.9996 | 0.0002 |
| <b>whgrn_2_ti</b> | -0.0146  | 0.0295 | 0.2463  | 0.6197 |
| <b>whgrn_3</b>    | 0.0470   | 0.0206 | 5.2027  | 0.0226 |
| <b>whgrn_3_ti</b> | -0.00339 | 0.0304 | 0.0125  | 0.9111 |
| <b>whgrn_4</b>    | 0.0320   | 0.0193 | 2.7425  | 0.0977 |
| <b>whgrn_4_ti</b> | 0.000501 | 0.0312 | 0.0003  | 0.9872 |
| <b>soda_1</b>     | -0.00103 | 0.0298 | 0.0012  | 0.9726 |
| <b>soda_1_ti</b>  | -0.0343  | 0.0157 | 4.7392  | 0.0295 |
| <b>soda_2</b>     | -0.0131  | 0.0251 | 0.2740  | 0.6006 |
| <b>soda_2_ti</b>  | -0.00051 | 0.0131 | 0.0015  | 0.9689 |
| <b>soda_3</b>     | 0.000061 | 0.0239 | 0.0000  | 0.9980 |
| <b>soda_3_ti</b>  | 0.00690  | 0.0133 | 0.2687  | 0.6042 |
| <b>soda_4</b>     | 0.000549 | 0.0229 | 0.0006  | 0.9809 |
| <b>soda_4_ti</b>  | -0.0289  | 0.0136 | 4.5309  | 0.0333 |
| <b>cal_1</b>      | -0.0421  | 0.0276 | 2.3309  | 0.1268 |
| <b>cal_1_ti</b>   | 0.0320   | 0.0318 | 1.0120  | 0.3144 |
| <b>cal_2</b>      | -0.0425  | 0.0242 | 3.0844  | 0.0790 |
| <b>cal_2_ti</b>   | -0.00824 | 0.0296 | 0.0773  | 0.7810 |
| <b>cal_3</b>      | -0.0238  | 0.0222 | 1.1489  | 0.2838 |
| <b>cal_3_ti</b>   | 0.0158   | 0.0284 | 0.3090  | 0.5783 |
| <b>cal_4</b>      | -0.0254  | 0.0205 | 1.5252  | 0.2168 |
| <b>cal_4_ti</b>   | 0.00465  | 0.0279 | 0.0278  | 0.8676 |
| <b>alc_1</b>      | 0.0685   | 0.0279 | 6.0399  | 0.0140 |
| <b>alc_1_ti</b>   | -0.0478  | 0.0223 | 4.5904  | 0.0322 |
| <b>alc_2</b>      | 0.0677   | 0.0252 | 7.2041  | 0.0073 |



|                 |          |        |          |        |
|-----------------|----------|--------|----------|--------|
| <b>alc_2_ti</b> | -0.0510  | 0.0241 | 4.4912   | 0.0341 |
| <b>alc_3</b>    | 0.0465   | 0.0252 | 3.3961   | 0.0653 |
| <b>alc_3_ti</b> | -0.0241  | 0.0308 | 0.6126   | 0.4338 |
| <b>cig_1</b>    | -0.1520  | 0.0712 | 4.5576   | 0.0328 |
| <b>cig_2</b>    | -0.0941  | 0.0816 | 1.3279   | 0.2492 |
| <b>cig_3</b>    | -0.00202 | 0.0729 | 0.0008   | 0.9779 |
| <b>cig_4</b>    | -0.00595 | 0.0664 | 0.0080   | 0.9287 |
| <b>mvi</b>      | -0.1061  | 0.0110 | 93.7643  | <.0001 |
| <b>act_1</b>    | 0.0496   | 0.0174 | 8.1451   | 0.0043 |
| <b>act_1_ti</b> | -0.00994 | 0.0238 | 0.1744   | 0.6762 |
| <b>act_2</b>    | 0.0666   | 0.0185 | 12.8795  | 0.0003 |
| <b>act_2_ti</b> | -0.00893 | 0.0280 | 0.1015   | 0.7500 |
| <b>act_3</b>    | 0.0493   | 0.0314 | 2.4623   | 0.1166 |
| <b>act_3_ti</b> | -0.0221  | 0.0492 | 0.2015   | 0.6535 |
| <b>act_4</b>    | 0.0438   | 0.0201 | 4.7476   | 0.0293 |
| <b>act_4_ti</b> | -0.0118  | 0.0329 | 0.1290   | 0.7194 |
| <b>act_5</b>    | 0.0443   | 0.0322 | 1.8922   | 0.1690 |
| <b>act_5_ti</b> | 0.0238   | 0.0536 | 0.1970   | 0.6572 |
| <b>can</b>      | 0.0939   | 0.0356 | 6.9640   | 0.0083 |
| <b>bmi_1</b>    | 0.0709   | 0.0753 | 0.8877   | 0.3461 |
| <b>bmi_2</b>    | 0.1162   | 0.0460 | 6.3732   | 0.0116 |
| <b>bmi_3</b>    | 0.0862   | 0.0423 | 4.1453   | 0.0418 |
| <b>bmi_4</b>    | 0.0685   | 0.0389 | 3.0985   | 0.0784 |
| <b>bmi_5</b>    | 0.0239   | 0.0343 | 0.4840   | 0.4866 |
| <b>chl</b>      | -0.1322  | 0.0198 | 44.6852  | <.0001 |
| <b>hbp</b>      | -0.3000  | 0.0220 | 186.0517 | <.0001 |
| <b>sta</b>      | -0.3438  | 0.0188 | 333.5372 | <.0001 |
| <b>sta_ti</b>   | 0.00284  | 0.0236 | 0.0145   | 0.9043 |

---

(DD) Logistic model to estimate the probability of incident angina or CABG

| <b>Variable</b>      | <b>Log odds ratio</b> | <b>Standard error</b> | <b>Wald chi-square</b> | <b>P value</b> |
|----------------------|-----------------------|-----------------------|------------------------|----------------|
| <b>Intercept</b>     | -8.2550               | 0.9722                | 72.1049                | <.0001         |
| <b>fhx</b>           | 0.1634                | 0.0372                | 19.2443                | <.0001         |
| <b>smkhx</b>         | 0.1337                | 0.0379                | 12.4587                | 0.0004         |
| <b>ochx</b>          | 0.0901                | 0.0341                | 6.9776                 | 0.0083         |
| <b>employed_1</b>    | 0.0331                | 0.0636                | 0.2705                 | 0.6030         |
| <b>employed_2</b>    | 0.1986                | 0.0979                | 4.1177                 | 0.0424         |
| <b>employed_3</b>    | 0.0672                | 0.0510                | 1.7337                 | 0.1879         |
| <b>employed_4</b>    | 0.1185                | 0.0672                | 3.1117                 | 0.0777         |
| <b>employed_5</b>    | 0.0399                | 0.0473                | 0.7123                 | 0.3987         |
| <b>employed_6</b>    | -0.0184               | 0.0728                | 0.0640                 | 0.8003         |
| <b>employed_miss</b> | 0.5702                | 0.2527                | 5.0912                 | 0.0240         |
| <b>mar80</b>         | -0.0827               | 0.0550                | 2.2582                 | 0.1329         |
| <b>college</b>       | -0.0136               | 0.0378                | 0.1303                 | 0.7181         |
| <b>stress82</b>      | 0.2091                | 0.0404                | 26.7422                | <.0001         |
| <b>stress82_miss</b> | -0.1365               | 0.2406                | 0.3220                 | 0.5704         |
| <b>hhighsch</b>      | 0.0494                | 0.0426                | 1.3438                 | 0.2464         |
| <b>hcollege</b>      | -0.0667               | 0.0487                | 1.8767                 | 0.1707         |
| <b>hgradsch</b>      | -0.1483               | 0.0536                | 7.6571                 | 0.0057         |
| <b>lbmi18_2</b>      | -0.0187               | 0.0390                | 0.2299                 | 0.6316         |
| <b>lbmi18_3</b>      | -0.0491               | 0.0599                | 0.6720                 | 0.4124         |
| <b>lbmi18_4</b>      | -0.1623               | 0.1358                | 1.4274                 | 0.2322         |
| <b>baseage</b>       | 0.0118                | 0.0370                | 0.1022                 | 0.7492         |
| <b>baseage_sq</b>    | 0.000321              | 0.000355              | 0.8203                 | 0.3651         |
| <b>bmi80_1</b>       | 0.000744              | 0.2369                | 0.0000                 | 0.9975         |
| <b>bmi80_2</b>       | -0.1791               | 0.1398                | 1.6421                 | 0.2000         |
| <b>bmi80_3</b>       | -0.0751               | 0.1300                | 0.3340                 | 0.5633         |
| <b>bmi80_4</b>       | -0.00920              | 0.1214                | 0.0057                 | 0.9396         |
| <b>bmi80_5</b>       | 0.0211                | 0.1133                | 0.0346                 | 0.8525         |
| <b>act80_1</b>       | -0.0124               | 0.0475                | 0.0684                 | 0.7937         |
| <b>act80_2</b>       | -0.00679              | 0.0562                | 0.0146                 | 0.9038         |
| <b>act80_3</b>       | 0.0462                | 0.0498                | 0.8602                 | 0.3537         |
| <b>alc80_1</b>       | -0.0187               | 0.0556                | 0.1126                 | 0.7372         |

|                    |          |        |          |        |
|--------------------|----------|--------|----------|--------|
| <b>alc80_2</b>     | -0.0430  | 0.0540 | 0.6321   | 0.4266 |
| <b>alc80_3</b>     | 0.0705   | 0.0592 | 1.4153   | 0.2342 |
| <b>rpmeats80_1</b> | 0.0422   | 0.0887 | 0.2259   | 0.6346 |
| <b>rpmeats80_2</b> | -0.0286  | 0.0567 | 0.2550   | 0.6136 |
| <b>rpmeats80_3</b> | 0.0290   | 0.0482 | 0.3603   | 0.5484 |
| <b>rpmeats80_4</b> | -0.0293  | 0.0441 | 0.4406   | 0.5068 |
| <b>coff80_1</b>    | 0.0703   | 0.0455 | 2.3830   | 0.1227 |
| <b>coff80_2</b>    | -0.0487  | 0.0697 | 0.4888   | 0.4845 |
| <b>coff80_3</b>    | 0.0399   | 0.1010 | 0.1562   | 0.6927 |
| <b>whgrn80_1</b>   | 0.00785  | 0.0464 | 0.0286   | 0.8656 |
| <b>whgrn80_2</b>   | 0.00990  | 0.0488 | 0.0412   | 0.8391 |
| <b>soda80_1</b>    | 0.0924   | 0.0593 | 2.4315   | 0.1189 |
| <b>soda80_2</b>    | -0.0192  | 0.0533 | 0.1297   | 0.7188 |
| <b>soda80_3</b>    | 0.0295   | 0.0519 | 0.3225   | 0.5701 |
| <b>soda80_4</b>    | 0.00607  | 0.0495 | 0.0150   | 0.9024 |
| <b>cig80_1</b>     | -0.4636  | 0.1156 | 16.0828  | <.0001 |
| <b>cig80_2</b>     | -0.2758  | 0.1527 | 3.2650   | 0.0708 |
| <b>cig80_3</b>     | -0.2345  | 0.1281 | 3.3529   | 0.0671 |
| <b>cig80_4</b>     | -0.2075  | 0.1098 | 3.5750   | 0.0587 |
| <b>period_2</b>    | 2.1780   | 0.2284 | 90.9746  | <.0001 |
| <b>period_3</b>    | 1.5617   | 0.2121 | 54.2285  | <.0001 |
| <b>period_4</b>    | 1.6792   | 0.1713 | 96.0396  | <.0001 |
| <b>period_5</b>    | 1.4622   | 0.2108 | 48.1201  | <.0001 |
| <b>period_6</b>    | 0.9821   | 0.1013 | 93.9788  | <.0001 |
| <b>period_7</b>    | 1.2406   | 0.1895 | 42.8687  | <.0001 |
| <b>period_8</b>    | 1.1292   | 0.0938 | 144.7987 | <.0001 |
| <b>period_9</b>    | 1.0373   | 0.1907 | 29.5907  | <.0001 |
| <b>period_10</b>   | 0.9038   | 0.0913 | 98.0213  | <.0001 |
| <b>period_11</b>   | -0.7083  | 0.2104 | 11.3352  | 0.0008 |
| <b>mnp_l2</b>      | -0.1204  | 0.0742 | 2.6318   | 0.1047 |
| <b>mnp_l1</b>      | -0.0474  | 0.0994 | 0.2273   | 0.6336 |
| <b>pmh_l2</b>      | 0.1107   | 0.0526 | 4.4338   | 0.0352 |
| <b>pmh_l1</b>      | 0.1104   | 0.0588 | 3.5255   | 0.0604 |
| <b>ost_l2</b>      | -0.00151 | 0.0879 | 0.0003   | 0.9863 |
| <b>ost_l1</b>      | 0.0219   | 0.1059 | 0.0429   | 0.8358 |

|                        |          |        |        |        |
|------------------------|----------|--------|--------|--------|
| <b>rpmeats_l1_1</b>    | -0.0467  | 0.1573 | 0.0881 | 0.7667 |
| <b>rpmeats_l1_1_ti</b> | -0.0491  | 0.0863 | 0.3236 | 0.5695 |
| <b>rpmeats_l1_2</b>    | -0.1650  | 0.1297 | 1.6202 | 0.2031 |
| <b>rpmeats_l1_2_ti</b> | 0.0782   | 0.0743 | 1.1095 | 0.2922 |
| <b>rpmeats_l1_3</b>    | -0.0691  | 0.1219 | 0.3209 | 0.5711 |
| <b>rpmeats_l1_3_ti</b> | 0.0288   | 0.0716 | 0.1618 | 0.6875 |
| <b>rpmeats_l1_4</b>    | 0.0796   | 0.1014 | 0.6159 | 0.4326 |
| <b>rpmeats_l1_4_ti</b> | -0.0344  | 0.0629 | 0.3002 | 0.5837 |
| <b>coff_l1_1</b>       | -0.0283  | 0.1424 | 0.0395 | 0.8425 |
| <b>coff_l1_1_ti</b>    | -0.0341  | 0.0726 | 0.2212 | 0.6381 |
| <b>coff_l1_2</b>       | -0.2607  | 0.1816 | 2.0619 | 0.1510 |
| <b>coff_l1_2_ti</b>    | 0.1644   | 0.0977 | 2.8342 | 0.0923 |
| <b>coff_l1_3</b>       | 0.2344   | 0.1734 | 1.8275 | 0.1764 |
| <b>coff_l1_3_ti</b>    | -0.0544  | 0.0996 | 0.2980 | 0.5852 |
| <b>coff_l1_4</b>       | -0.0719  | 0.0903 | 0.6332 | 0.4262 |
| <b>coff_l1_4_ti</b>    | -0.00492 | 0.0511 | 0.0093 | 0.9234 |
| <b>whgrn_l1_1</b>      | 0.1165   | 0.1342 | 0.7544 | 0.3851 |
| <b>whgrn_l1_1_ti</b>   | 0.0175   | 0.0751 | 0.0540 | 0.8162 |
| <b>whgrn_l1_2</b>      | 0.00324  | 0.1344 | 0.0006 | 0.9808 |
| <b>whgrn_l1_2_ti</b>   | 0.0112   | 0.0760 | 0.0217 | 0.8828 |
| <b>whgrn_l1_3</b>      | 0.0472   | 0.1370 | 0.1184 | 0.7307 |
| <b>whgrn_l1_3_ti</b>   | 0.0341   | 0.0767 | 0.1972 | 0.6570 |
| <b>whgrn_l1_4</b>      | 0.2471   | 0.1322 | 3.4946 | 0.0616 |
| <b>whgrn_l1_4_ti</b>   | -0.0845  | 0.0747 | 1.2773 | 0.2584 |
| <b>soda_l1_1</b>       | -0.1015  | 0.1486 | 0.4665 | 0.4946 |
| <b>soda_l1_1_ti</b>    | 0.0563   | 0.0492 | 1.3115 | 0.2521 |
| <b>soda_l1_2</b>       | -0.00806 | 0.1208 | 0.0044 | 0.9468 |
| <b>soda_l1_2_ti</b>    | 0.00575  | 0.0403 | 0.0204 | 0.8865 |
| <b>soda_l1_3</b>       | -0.1068  | 0.1202 | 0.7893 | 0.3743 |
| <b>soda_l1_3_ti</b>    | 0.0207   | 0.0416 | 0.2468 | 0.6193 |
| <b>soda_l1_4</b>       | 0.0383   | 0.1172 | 0.1071 | 0.7435 |
| <b>soda_l1_4_ti</b>    | -0.00021 | 0.0422 | 0.0000 | 0.9961 |
| <b>cal_l1_1</b>        | 0.0653   | 0.1443 | 0.2047 | 0.6510 |
| <b>cal_l1_1_ti</b>     | -0.1409  | 0.0804 | 3.0758 | 0.0795 |
| <b>cal_l1_2</b>        | -0.0845  | 0.1341 | 0.3974 | 0.5285 |

|                    |          |        |         |        |
|--------------------|----------|--------|---------|--------|
| <b>cal_l1_2_ti</b> | -0.1014  | 0.0760 | 1.7806  | 0.1821 |
| <b>cal_l1_3</b>    | -0.00765 | 0.1256 | 0.0037  | 0.9514 |
| <b>cal_l1_3_ti</b> | -0.0481  | 0.0715 | 0.4534  | 0.5007 |
| <b>cal_l1_4</b>    | 0.0117   | 0.1206 | 0.0094  | 0.9228 |
| <b>cal_l1_4_ti</b> | -0.0727  | 0.0697 | 1.0854  | 0.2975 |
| <b>alc_l1_1</b>    | 0.2675   | 0.1294 | 4.2733  | 0.0387 |
| <b>alc_l1_1_ti</b> | -0.1227  | 0.0602 | 4.1474  | 0.0417 |
| <b>alc_l1_2</b>    | 0.1598   | 0.1283 | 1.5519  | 0.2129 |
| <b>alc_l1_2_ti</b> | -0.0774  | 0.0660 | 1.3742  | 0.2411 |
| <b>alc_l1_3</b>    | -0.0678  | 0.1564 | 0.1881  | 0.6645 |
| <b>alc_l1_3_ti</b> | 0.0827   | 0.0872 | 0.8995  | 0.3429 |
| <b>cig_l2_1</b>    | -0.2563  | 0.1812 | 2.0001  | 0.1573 |
| <b>cig_l1_1</b>    | -0.8606  | 0.1921 | 20.0732 | <.0001 |
| <b>cig_l2_2</b>    | -0.1127  | 0.2185 | 0.2661  | 0.6060 |
| <b>cig_l1_2</b>    | -0.6276  | 0.2343 | 7.1787  | 0.0074 |
| <b>cig_l2_3</b>    | -0.2525  | 0.1902 | 1.7625  | 0.1843 |
| <b>cig_l1_3</b>    | -0.4983  | 0.2011 | 6.1386  | 0.0132 |
| <b>cig_l2_4</b>    | -0.0188  | 0.1615 | 0.0136  | 0.9072 |
| <b>cig_l1_4</b>    | -0.1634  | 0.1716 | 0.9069  | 0.3409 |
| <b>mvi_l2</b>      | 0.00912  | 0.0349 | 0.0684  | 0.7937 |
| <b>mvi_l1</b>      | -0.0569  | 0.0364 | 2.4387  | 0.1184 |
| <b>act_l1_1</b>    | 0.1381   | 0.0739 | 3.4926  | 0.0616 |
| <b>act_l1_1_ti</b> | -0.0342  | 0.0551 | 0.3845  | 0.5352 |
| <b>act_l1_2</b>    | 0.0968   | 0.0804 | 1.4470  | 0.2290 |
| <b>act_l1_2_ti</b> | 0.0576   | 0.0642 | 0.8045  | 0.3697 |
| <b>act_l1_3</b>    | 0.0855   | 0.1358 | 0.3963  | 0.5290 |
| <b>act_l1_3_ti</b> | -0.3376  | 0.1770 | 3.6407  | 0.0564 |
| <b>act_l1_4</b>    | -0.0104  | 0.0911 | 0.0129  | 0.9096 |
| <b>act_l1_4_ti</b> | -0.0273  | 0.0684 | 0.1590  | 0.6901 |
| <b>act_l1_5</b>    | -0.2320  | 0.1608 | 2.0835  | 0.1489 |
| <b>act_l1_5_ti</b> | 0.1217   | 0.1709 | 0.5066  | 0.4766 |
| <b>can_l2</b>      | 0.1325   | 0.1475 | 0.8067  | 0.3691 |
| <b>can_l1</b>      | 0.1787   | 0.1773 | 1.0156  | 0.3136 |
| <b>bmi_l2_1</b>    | -0.4366  | 0.2945 | 2.1982  | 0.1382 |
| <b>bmi_l1_1</b>    | -0.9361  | 0.2999 | 9.7429  | 0.0018 |

|                     |          |        |          |        |
|---------------------|----------|--------|----------|--------|
| <b>bmi_l2_2</b>     | -0.2678  | 0.1629 | 2.7019   | 0.1002 |
| <b>bmi_l1_2</b>     | -0.6501  | 0.1690 | 14.8055  | 0.0001 |
| <b>bmi_l2_3</b>     | -0.2794  | 0.1470 | 3.6147   | 0.0573 |
| <b>bmi_l1_3</b>     | -0.4890  | 0.1515 | 10.4160  | 0.0012 |
| <b>bmi_l2_4</b>     | -0.2304  | 0.1338 | 2.9640   | 0.0851 |
| <b>bmi_l1_4</b>     | -0.3569  | 0.1382 | 6.6725   | 0.0098 |
| <b>bmi_l2_5</b>     | -0.2028  | 0.1160 | 3.0569   | 0.0804 |
| <b>bmi_l1_5</b>     | -0.1460  | 0.1194 | 1.4959   | 0.2213 |
| <b>chl_l2</b>       | -0.0850  | 0.0622 | 1.8637   | 0.1722 |
| <b>chl_l1</b>       | -0.2390  | 0.0715 | 11.1613  | 0.0008 |
| <b>hbp_l2</b>       | 0.0814   | 0.0704 | 1.3388   | 0.2473 |
| <b>hbp_l1</b>       | -0.4786  | 0.0837 | 32.6761  | <.0001 |
| <b>sta_l1</b>       | -0.6574  | 0.0651 | 101.9478 | <.0001 |
| <b>sta_l1_ti</b>    | 0.0324   | 0.0701 | 0.2135   | 0.6440 |
| <b>asn_l2_1</b>     | 0.0528   | 0.0517 | 1.0428   | 0.3072 |
| <b>asn_l1_1</b>     | 0.6286   | 0.0565 | 123.7852 | <.0001 |
| <b>asn_l2_2</b>     | 0.0818   | 0.0488 | 2.8074   | 0.0938 |
| <b>asn_l1_2</b>     | 0.3014   | 0.0520 | 33.5940  | <.0001 |
| <b>str_l2</b>       | 0.0176   | 0.3395 | 0.0027   | 0.9586 |
| <b>str_l1</b>       | 0.1011   | 0.2752 | 0.1348   | 0.7135 |
| <b>mnp</b>          | 0.2221   | 0.0892 | 6.2045   | 0.0127 |
| <b>pmh</b>          | -0.0742  | 0.0505 | 2.1620   | 0.1415 |
| <b>ost</b>          | 0.3773   | 0.0758 | 24.7873  | <.0001 |
| <b>rpmeats_1</b>    | 0.2510   | 0.0848 | 8.7596   | 0.0031 |
| <b>rpmeats_1_ti</b> | -0.0920  | 0.0891 | 1.0652   | 0.3020 |
| <b>rpmeats_2</b>    | 0.1309   | 0.0764 | 2.9413   | 0.0863 |
| <b>rpmeats_2_ti</b> | 0.0232   | 0.0782 | 0.0883   | 0.7664 |
| <b>rpmeats_3</b>    | 0.0463   | 0.0744 | 0.3883   | 0.5332 |
| <b>rpmeats_3_ti</b> | -0.00616 | 0.0763 | 0.0065   | 0.9356 |
| <b>rpmeats_4</b>    | 0.0345   | 0.0701 | 0.2424   | 0.6225 |
| <b>rpmeats_4_ti</b> | -0.1093  | 0.0691 | 2.4987   | 0.1139 |
| <b>coff_1</b>       | 0.1417   | 0.1061 | 1.7838   | 0.1817 |
| <b>coff_1_ti</b>    | -0.0716  | 0.0753 | 0.9044   | 0.3416 |
| <b>coff_2</b>       | 0.1559   | 0.0940 | 2.7485   | 0.0973 |
| <b>coff_2_ti</b>    | 0.0867   | 0.1020 | 0.7225   | 0.3953 |

|                   |          |        |         |        |
|-------------------|----------|--------|---------|--------|
| <b>coff_3</b>     | 0.1056   | 0.1017 | 1.0778  | 0.2992 |
| <b>coff_3_ti</b>  | -0.1560  | 0.1089 | 2.0536  | 0.1518 |
| <b>coff_4</b>     | 0.1311   | 0.0568 | 5.3252  | 0.0210 |
| <b>coff_4_ti</b>  | -0.0217  | 0.0535 | 0.1654  | 0.6843 |
| <b>whgrn_1</b>    | -0.0829  | 0.0785 | 1.1153  | 0.2909 |
| <b>whgrn_1_ti</b> | 0.0315   | 0.0785 | 0.1614  | 0.6879 |
| <b>whgrn_2</b>    | -0.1055  | 0.0713 | 2.1882  | 0.1391 |
| <b>whgrn_2_ti</b> | 0.0958   | 0.0795 | 1.4526  | 0.2281 |
| <b>whgrn_3</b>    | -0.0260  | 0.0660 | 0.1547  | 0.6941 |
| <b>whgrn_3_ti</b> | 0.00359  | 0.0809 | 0.0020  | 0.9646 |
| <b>whgrn_4</b>    | 0.0421   | 0.0617 | 0.4646  | 0.4955 |
| <b>whgrn_4_ti</b> | -0.1209  | 0.0790 | 2.3416  | 0.1260 |
| <b>soda_1</b>     | -0.0600  | 0.1010 | 0.3527  | 0.5526 |
| <b>soda_1_ti</b>  | -0.0263  | 0.0523 | 0.2528  | 0.6151 |
| <b>soda_2</b>     | -0.1024  | 0.0858 | 1.4255  | 0.2325 |
| <b>soda_2_ti</b>  | 0.0274   | 0.0426 | 0.4122  | 0.5209 |
| <b>soda_3</b>     | -0.0589  | 0.0821 | 0.5151  | 0.4729 |
| <b>soda_3_ti</b>  | 0.0171   | 0.0442 | 0.1502  | 0.6984 |
| <b>soda_4</b>     | -0.0888  | 0.0792 | 1.2571  | 0.2622 |
| <b>soda_4_ti</b>  | -0.00500 | 0.0453 | 0.0121  | 0.9123 |
| <b>cal_1</b>      | -0.0361  | 0.0879 | 0.1683  | 0.6816 |
| <b>cal_1_ti</b>   | -0.1145  | 0.0838 | 1.8675  | 0.1718 |
| <b>cal_2</b>      | -0.0547  | 0.0781 | 0.4899  | 0.4840 |
| <b>cal_2_ti</b>   | 0.00354  | 0.0793 | 0.0020  | 0.9644 |
| <b>cal_3</b>      | -0.0254  | 0.0716 | 0.1258  | 0.7228 |
| <b>cal_3_ti</b>   | -0.0609  | 0.0763 | 0.6370  | 0.4248 |
| <b>cal_4</b>      | -0.0567  | 0.0669 | 0.7175  | 0.3970 |
| <b>cal_4_ti</b>   | 0.00642  | 0.0744 | 0.0074  | 0.9313 |
| <b>alc_1</b>      | 0.1681   | 0.0928 | 3.2815  | 0.0701 |
| <b>alc_1_ti</b>   | -0.1016  | 0.0622 | 2.6695  | 0.1023 |
| <b>alc_2</b>      | 0.1127   | 0.0863 | 1.7053  | 0.1916 |
| <b>alc_2_ti</b>   | -0.0728  | 0.0690 | 1.1144  | 0.2911 |
| <b>alc_3</b>      | -0.0357  | 0.0913 | 0.1533  | 0.6954 |
| <b>alc_3_ti</b>   | 0.1090   | 0.0932 | 1.3686  | 0.2421 |
| <b>cig_1</b>      | 1.2952   | 0.1951 | 44.0844 | <.0001 |

|                 |         |        |          |        |
|-----------------|---------|--------|----------|--------|
| <b>cig_2</b>    | 0.8555  | 0.2382 | 12.9035  | 0.0003 |
| <b>cig_3</b>    | 0.3068  | 0.2155 | 2.0262   | 0.1546 |
| <b>cig_4</b>    | 0.0560  | 0.1934 | 0.0838   | 0.7722 |
| <b>mvi</b>      | 0.0382  | 0.0347 | 1.2138   | 0.2706 |
| <b>act_1</b>    | 0.0337  | 0.0623 | 0.2919   | 0.5890 |
| <b>act_1_ti</b> | -0.0141 | 0.0767 | 0.0340   | 0.8538 |
| <b>act_2</b>    | 0.0178  | 0.0673 | 0.0702   | 0.7910 |
| <b>act_2_ti</b> | -0.0273 | 0.0903 | 0.0915   | 0.7623 |
| <b>act_3</b>    | 0.0443  | 0.1144 | 0.1498   | 0.6988 |
| <b>act_3_ti</b> | 0.0142  | 0.1548 | 0.0084   | 0.9271 |
| <b>act_4</b>    | -0.0416 | 0.0756 | 0.3019   | 0.5827 |
| <b>act_4_ti</b> | 0.0513  | 0.1071 | 0.2297   | 0.6318 |
| <b>act_5</b>    | 0.0588  | 0.1217 | 0.2333   | 0.6291 |
| <b>act_5_ti</b> | 0.0718  | 0.1822 | 0.1554   | 0.6934 |
| <b>can</b>      | -0.2225 | 0.1226 | 3.2909   | 0.0697 |
| <b>bmi_1</b>    | 1.1665  | 0.2381 | 24.0042  | <.0001 |
| <b>bmi_2</b>    | 0.7933  | 0.1479 | 28.7838  | <.0001 |
| <b>bmi_3</b>    | 0.7434  | 0.1335 | 31.0293  | <.0001 |
| <b>bmi_4</b>    | 0.5444  | 0.1220 | 19.9261  | <.0001 |
| <b>bmi_5</b>    | 0.2837  | 0.1081 | 6.8893   | 0.0087 |
| <b>chl</b>      | 0.7950  | 0.0539 | 217.2924 | <.0001 |
| <b>hbp</b>      | 1.0876  | 0.0577 | 354.8780 | <.0001 |
| <b>sta</b>      | 1.1962  | 0.0508 | 555.0145 | <.0001 |
| <b>sta_ti</b>   | -0.0761 | 0.0642 | 1.4056   | 0.2358 |
| <b>asn_1</b>    | -1.4813 | 0.0477 | 965.9620 | <.0001 |
| <b>asn_2</b>    | -1.0180 | 0.0461 | 488.3658 | <.0001 |

---



(EE) Logistic model to estimate the probability of incident stroke

| <b>Parameter</b>     | <b>Log odds ratio</b> | <b>Standard error</b> | <b>Wald chi-square</b> | <b>P value</b> |
|----------------------|-----------------------|-----------------------|------------------------|----------------|
| <b>Intercept</b>     | -9.3079               | 1.9233                | 23.4210                | <.0001         |
| <b>fhx</b>           | -0.0800               | 0.0732                | 1.1937                 | 0.2746         |
| <b>smkhx</b>         | 0.0630                | 0.0734                | 0.7357                 | 0.3910         |
| <b>ochx</b>          | 0.0563                | 0.0628                | 0.8048                 | 0.3696         |
| <b>employed_1</b>    | -0.0147               | 0.1149                | 0.0165                 | 0.8979         |
| <b>employed_2</b>    | 0.2263                | 0.1755                | 1.6638                 | 0.1971         |
| <b>employed_3</b>    | 0.0392                | 0.0911                | 0.1851                 | 0.6671         |
| <b>employed_4</b>    | -0.0119               | 0.1282                | 0.0086                 | 0.9263         |
| <b>employed_5</b>    | 0.0223                | 0.0829                | 0.0723                 | 0.7880         |
| <b>employed_6</b>    | -0.2010               | 0.1374                | 2.1400                 | 0.1435         |
| <b>employed_miss</b> | -0.2807               | 0.3434                | 0.6685                 | 0.4136         |
| <b>mar80</b>         | -0.0851               | 0.0981                | 0.7518                 | 0.3859         |
| <b>college</b>       | -0.0905               | 0.0712                | 1.6141                 | 0.2039         |
| <b>stress82</b>      | 0.0979                | 0.0706                | 1.9210                 | 0.1657         |
| <b>stress82_miss</b> | 0.4608                | 0.3099                | 2.2114                 | 0.1370         |
| <b>hhighsch</b>      | -0.0948               | 0.0776                | 1.4932                 | 0.2217         |
| <b>hcollege</b>      | -0.1918               | 0.0901                | 4.5277                 | 0.0334         |
| <b>hgradsch</b>      | -0.0599               | 0.0944                | 0.4023                 | 0.5259         |
| <b>lbmi18_2</b>      | 0.0240                | 0.0718                | 0.1120                 | 0.7379         |
| <b>lbmi18_3</b>      | 0.0633                | 0.1103                | 0.3296                 | 0.5659         |
| <b>lbmi18_4</b>      | 0.3946                | 0.2071                | 3.6311                 | 0.0567         |
| <b>baseage</b>       | 0.00408               | 0.0724                | 0.0032                 | 0.9551         |
| <b>baseage_sq</b>    | 0.000786              | 0.000684              | 1.3202                 | 0.2506         |
| <b>bmi80_1</b>       | 0.0757                | 0.3691                | 0.0420                 | 0.8376         |
| <b>bmi80_2</b>       | -0.00645              | 0.2524                | 0.0007                 | 0.9796         |
| <b>bmi80_3</b>       | -0.00673              | 0.2404                | 0.0008                 | 0.9777         |
| <b>bmi80_4</b>       | 0.0686                | 0.2283                | 0.0901                 | 0.7640         |
| <b>bmi80_5</b>       | 0.1283                | 0.2191                | 0.3432                 | 0.5580         |
| <b>act80_1</b>       | -0.0591               | 0.0777                | 0.5786                 | 0.4468         |
| <b>act80_2</b>       | -0.1024               | 0.0957                | 1.1438                 | 0.2848         |
| <b>act80_3</b>       | -0.1462               | 0.0844                | 2.9987                 | 0.0833         |
| <b>alc80_1</b>       | 0.0218                | 0.0951                | 0.0527                 | 0.8185         |

|                    |          |        |         |        |
|--------------------|----------|--------|---------|--------|
| <b>alc80_2</b>     | -0.1614  | 0.0971 | 2.7641  | 0.0964 |
| <b>alc80_3</b>     | 0.0770   | 0.1047 | 0.5410  | 0.4620 |
| <b>rpmeats80_1</b> | -0.0154  | 0.1549 | 0.0099  | 0.9209 |
| <b>rpmeats80_2</b> | -0.0581  | 0.1004 | 0.3353  | 0.5626 |
| <b>rpmeats80_3</b> | -0.0917  | 0.0905 | 1.0268  | 0.3109 |
| <b>rpmeats80_4</b> | -0.0846  | 0.0818 | 1.0702  | 0.3009 |
| <b>coff80_1</b>    | 0.0300   | 0.0816 | 0.1346  | 0.7137 |
| <b>coff80_2</b>    | 0.0662   | 0.1214 | 0.2974  | 0.5855 |
| <b>coff80_3</b>    | -0.2691  | 0.2134 | 1.5892  | 0.2074 |
| <b>whgrn80_1</b>   | 0.0403   | 0.0829 | 0.2365  | 0.6268 |
| <b>whgrn80_2</b>   | -0.1062  | 0.0898 | 1.3968  | 0.2373 |
| <b>soda80_1</b>    | -0.0114  | 0.1025 | 0.0124  | 0.9112 |
| <b>soda80_2</b>    | -0.0506  | 0.0946 | 0.2863  | 0.5926 |
| <b>soda80_3</b>    | -0.1060  | 0.0965 | 1.2065  | 0.2720 |
| <b>soda80_4</b>    | -0.1469  | 0.0937 | 2.4589  | 0.1169 |
| <b>cig80_1</b>     | -0.4696  | 0.1803 | 6.7824  | 0.0092 |
| <b>cig80_2</b>     | -0.2863  | 0.2614 | 1.1991  | 0.2735 |
| <b>cig80_3</b>     | -0.2864  | 0.1992 | 2.0685  | 0.1504 |
| <b>cig80_4</b>     | -0.0851  | 0.1661 | 0.2626  | 0.6083 |
| <b>period_2</b>    | -0.0622  | 0.6213 | 0.0100  | 0.9202 |
| <b>period_3</b>    | -0.5526  | 0.4115 | 1.8039  | 0.1792 |
| <b>period_4</b>    | -0.2115  | 0.3701 | 0.3267  | 0.5676 |
| <b>period_5</b>    | -0.2234  | 0.4095 | 0.2975  | 0.5854 |
| <b>period_6</b>    | -0.2963  | 0.1540 | 3.6999  | 0.0544 |
| <b>period_7</b>    | 0.2512   | 0.3310 | 0.5759  | 0.4479 |
| <b>period_8</b>    | 0.3116   | 0.1290 | 5.8341  | 0.0157 |
| <b>period_9</b>    | 0.4457   | 0.3309 | 1.8147  | 0.1779 |
| <b>period_10</b>   | 0.2665   | 0.1215 | 4.8103  | 0.0283 |
| <b>period_11</b>   | 0.0721   | 0.3313 | 0.0474  | 0.8277 |
| <b>mnp_l2</b>      | 0.3087   | 0.2249 | 1.8846  | 0.1698 |
| <b>mnp_l1</b>      | -0.6930  | 0.2842 | 5.9467  | 0.0147 |
| <b>pmh_l2</b>      | 0.2400   | 0.0923 | 6.7695  | 0.0093 |
| <b>pmh_l1</b>      | 0.4979   | 0.1017 | 23.9845 | <.0001 |
| <b>ost_l2</b>      | -0.00084 | 0.1451 | 0.0000  | 0.9954 |
| <b>ost_l1</b>      | 0.2054   | 0.1891 | 1.1794  | 0.2775 |

|                        |          |        |        |        |
|------------------------|----------|--------|--------|--------|
| <b>rpmeats_l1_1</b>    | 0.2601   | 0.6145 | 0.1792 | 0.6721 |
| <b>rpmeats_l1_1_ti</b> | -0.0932  | 0.3124 | 0.0890 | 0.7655 |
| <b>rpmeats_l1_2</b>    | -0.7150  | 0.6604 | 1.1720 | 0.2790 |
| <b>rpmeats_l1_2_ti</b> | 0.2189   | 0.3370 | 0.4219 | 0.5160 |
| <b>rpmeats_l1_3</b>    | 0.5289   | 0.4186 | 1.5964 | 0.2064 |
| <b>rpmeats_l1_3_ti</b> | -0.2053  | 0.2192 | 0.8774 | 0.3489 |
| <b>rpmeats_l1_4</b>    | 0.2457   | 0.3875 | 0.4021 | 0.5260 |
| <b>rpmeats_l1_4_ti</b> | -0.0350  | 0.2048 | 0.0293 | 0.8642 |
| <b>coff_l1_1</b>       | -1.3115  | 0.6395 | 4.2057 | 0.0403 |
| <b>coff_l1_1_ti</b>    | 0.6196   | 0.3181 | 3.7938 | 0.0514 |
| <b>coff_l1_2</b>       | -1.5798  | 1.0295 | 2.3549 | 0.1249 |
| <b>coff_l1_2_ti</b>    | 0.8126   | 0.5178 | 2.4624 | 0.1166 |
| <b>coff_l1_3</b>       | -1.0695  | 1.0273 | 1.0840 | 0.2978 |
| <b>coff_l1_3_ti</b>    | 0.5717   | 0.5210 | 1.2040 | 0.2725 |
| <b>coff_l1_4</b>       | -0.4497  | 0.3163 | 2.0210 | 0.1551 |
| <b>coff_l1_4_ti</b>    | 0.2869   | 0.1634 | 3.0833 | 0.0791 |
| <b>whgrn_l1_1</b>      | 0.0269   | 0.4675 | 0.0033 | 0.9541 |
| <b>whgrn_l1_1_ti</b>   | -0.1536  | 0.2397 | 0.4105 | 0.5217 |
| <b>whgrn_l1_2</b>      | 0.2650   | 0.4584 | 0.3342 | 0.5632 |
| <b>whgrn_l1_2_ti</b>   | -0.2474  | 0.2363 | 1.0968 | 0.2950 |
| <b>whgrn_l1_3</b>      | -0.6066  | 0.5798 | 1.0948 | 0.2954 |
| <b>whgrn_l1_3_ti</b>   | 0.2087   | 0.2956 | 0.4985 | 0.4802 |
| <b>whgrn_l1_4</b>      | -1.3541  | 0.7949 | 2.9018 | 0.0885 |
| <b>whgrn_l1_4_ti</b>   | 0.6498   | 0.4015 | 2.6192 | 0.1056 |
| <b>soda_l1_1</b>       | 0.000890 | 0.2792 | 0.0000 | 0.9975 |
| <b>soda_l1_1_ti</b>    | 0.0388   | 0.1076 | 0.1301 | 0.7183 |
| <b>soda_l1_2</b>       | -0.3075  | 0.2419 | 1.6157 | 0.2037 |
| <b>soda_l1_2_ti</b>    | 0.1674   | 0.0926 | 3.2635 | 0.0708 |
| <b>soda_l1_3</b>       | 0.1195   | 0.2506 | 0.2273 | 0.6335 |
| <b>soda_l1_3_ti</b>    | -0.00375 | 0.1008 | 0.0014 | 0.9703 |
| <b>soda_l1_4</b>       | -0.1588  | 0.2637 | 0.3629 | 0.5469 |
| <b>soda_l1_4_ti</b>    | 0.00481  | 0.1090 | 0.0019 | 0.9648 |
| <b>cal_l1_1</b>        | -0.4423  | 0.5558 | 0.6331 | 0.4262 |
| <b>cal_l1_1_ti</b>     | 0.1959   | 0.2835 | 0.4777 | 0.4895 |
| <b>cal_l1_2</b>        | -0.2331  | 0.5023 | 0.2154 | 0.6426 |

|                    |          |        |         |        |
|--------------------|----------|--------|---------|--------|
| <b>cal_l1_2_ti</b> | 0.1010   | 0.2577 | 0.1535  | 0.6952 |
| <b>cal_l1_3</b>    | 0.0488   | 0.4635 | 0.0111  | 0.9162 |
| <b>cal_l1_3_ti</b> | 0.0165   | 0.2390 | 0.0048  | 0.9450 |
| <b>cal_l1_4</b>    | -0.00559 | 0.4565 | 0.0001  | 0.9902 |
| <b>cal_l1_4_ti</b> | -0.0188  | 0.2365 | 0.0063  | 0.9366 |
| <b>alc_l1_1</b>    | -0.5665  | 0.3963 | 2.0431  | 0.1529 |
| <b>alc_l1_1_ti</b> | 0.0570   | 0.1912 | 0.0889  | 0.7656 |
| <b>alc_l1_2</b>    | -0.3030  | 0.4206 | 0.5191  | 0.4712 |
| <b>alc_l1_2_ti</b> | 0.0395   | 0.2101 | 0.0354  | 0.8508 |
| <b>alc_l1_3</b>    | 0.0289   | 0.4959 | 0.0034  | 0.9535 |
| <b>alc_l1_3_ti</b> | -0.0503  | 0.2563 | 0.0385  | 0.8445 |
| <b>cig_l2_1</b>    | -0.1954  | 0.3368 | 0.3367  | 0.5617 |
| <b>cig_l1_1</b>    | -1.9328  | 0.3362 | 33.0449 | <.0001 |
| <b>cig_l2_2</b>    | -0.2504  | 0.4163 | 0.3618  | 0.5475 |
| <b>cig_l1_2</b>    | -1.2970  | 0.4022 | 10.4010 | 0.0013 |
| <b>cig_l2_3</b>    | 0.3360   | 0.3300 | 1.0368  | 0.3086 |
| <b>cig_l1_3</b>    | -1.1709  | 0.3377 | 12.0180 | 0.0005 |
| <b>cig_l2_4</b>    | 0.1417   | 0.2952 | 0.2304  | 0.6313 |
| <b>cig_l1_4</b>    | -0.4729  | 0.2961 | 2.5510  | 0.1102 |
| <b>mvi_l2</b>      | 0.00164  | 0.0704 | 0.0005  | 0.9815 |
| <b>mvi_l1</b>      | 0.1019   | 0.0781 | 1.7054  | 0.1916 |
| <b>act_l1_1</b>    | -0.0553  | 0.1285 | 0.1849  | 0.6672 |
| <b>act_l1_1_ti</b> | -0.0385  | 0.1415 | 0.0739  | 0.7858 |
| <b>act_l1_2</b>    | -0.0746  | 0.1400 | 0.2836  | 0.5944 |
| <b>act_l1_2_ti</b> | 0.0740   | 0.1649 | 0.2016  | 0.6535 |
| <b>act_l1_3</b>    | 0.1729   | 0.2284 | 0.5735  | 0.4489 |
| <b>act_l1_3_ti</b> | 0.3048   | 0.2598 | 1.3756  | 0.2409 |
| <b>act_l1_4</b>    | -0.1305  | 0.1582 | 0.6803  | 0.4095 |
| <b>act_l1_4_ti</b> | 0.0955   | 0.1757 | 0.2955  | 0.5867 |
| <b>act_l1_5</b>    | -0.3683  | 0.3026 | 1.4808  | 0.2237 |
| <b>act_l1_5_ti</b> | 0.5493   | 0.3149 | 3.0436  | 0.0811 |
| <b>can_l2</b>      | -0.2273  | 0.2298 | 0.9784  | 0.3226 |
| <b>can_l1</b>      | -0.0540  | 0.2534 | 0.0454  | 0.8313 |
| <b>bmi_l2_1</b>    | -0.4429  | 0.4179 | 1.1231  | 0.2892 |
| <b>bmi_l1_1</b>    | -1.3838  | 0.4380 | 9.9826  | 0.0016 |

|                     |          |        |         |        |
|---------------------|----------|--------|---------|--------|
| <b>bmi_l2_2</b>     | -0.5812  | 0.2941 | 3.9050  | 0.0481 |
| <b>bmi_l1_2</b>     | -0.9507  | 0.3113 | 9.3239  | 0.0023 |
| <b>bmi_l2_3</b>     | -0.2533  | 0.2706 | 0.8766  | 0.3491 |
| <b>bmi_l1_3</b>     | -0.9201  | 0.2877 | 10.2247 | 0.0014 |
| <b>bmi_l2_4</b>     | -0.2240  | 0.2493 | 0.8070  | 0.3690 |
| <b>bmi_l1_4</b>     | -0.6737  | 0.2650 | 6.4635  | 0.0110 |
| <b>bmi_l2_5</b>     | -0.1463  | 0.2168 | 0.4553  | 0.4998 |
| <b>bmi_l1_5</b>     | -0.3538  | 0.2303 | 2.3597  | 0.1245 |
| <b>chl_l2</b>       | -0.0303  | 0.1299 | 0.0543  | 0.8157 |
| <b>chl_l1</b>       | -0.1213  | 0.1631 | 0.5527  | 0.4572 |
| <b>hbp_l2</b>       | 0.0505   | 0.1238 | 0.1660  | 0.6837 |
| <b>hbp_l1</b>       | -0.4537  | 0.1483 | 9.3557  | 0.0022 |
| <b>sta_l1</b>       | -0.4602  | 0.1059 | 18.8797 | <.0001 |
| <b>sta_l1_ti</b>    | -0.1249  | 0.2031 | 0.3779  | 0.5387 |
| <b>asn_l2_1</b>     | 0.1363   | 0.0905 | 2.2686  | 0.1320 |
| <b>asn_l1_1</b>     | 0.1736   | 0.0965 | 3.2362  | 0.0720 |
| <b>asn_l2_2</b>     | 0.1147   | 0.0879 | 1.7048  | 0.1917 |
| <b>asn_l1_2</b>     | 0.1923   | 0.0907 | 4.4961  | 0.0340 |
| <b>angcbg_l2</b>    | 0.5678   | 0.3200 | 3.1480  | 0.0760 |
| <b>angcbg_l1</b>    | -0.9112  | 0.3409 | 7.1451  | 0.0075 |
| <b>mi_l2</b>        | 0.1722   | 0.4775 | 0.1301  | 0.7183 |
| <b>mi_l1</b>        | 0.3046   | 0.4334 | 0.4938  | 0.4823 |
| <b>mnp</b>          | 0.4054   | 0.2400 | 2.8536  | 0.0912 |
| <b>pmh</b>          | -0.7290  | 0.0912 | 63.8917 | <.0001 |
| <b>ost</b>          | -0.0796  | 0.1425 | 0.3119  | 0.5765 |
| <b>rpmeats_1</b>    | -0.00441 | 0.1701 | 0.0007  | 0.9793 |
| <b>rpmeats_1_ti</b> | -0.2656  | 0.3152 | 0.7101  | 0.3994 |
| <b>rpmeats_2</b>    | -0.0431  | 0.1589 | 0.0737  | 0.7860 |
| <b>rpmeats_2_ti</b> | 0.2203   | 0.3392 | 0.4219  | 0.5160 |
| <b>rpmeats_3</b>    | 0.0559   | 0.1520 | 0.1350  | 0.7133 |
| <b>rpmeats_3_ti</b> | -0.4261  | 0.2253 | 3.5774  | 0.0586 |
| <b>rpmeats_4</b>    | -0.1615  | 0.1543 | 1.0951  | 0.2953 |
| <b>rpmeats_4_ti</b> | -0.0658  | 0.2126 | 0.0960  | 0.7567 |
| <b>coff_1</b>       | 0.6099   | 0.2025 | 9.0678  | 0.0026 |
| <b>coff_1_ti</b>    | 0.5332   | 0.3194 | 2.7870  | 0.0950 |

|                   |          |        |         |        |
|-------------------|----------|--------|---------|--------|
| <b>coff_2</b>     | 0.5141   | 0.1795 | 8.2014  | 0.0042 |
| <b>coff_2_ti</b>  | 0.8123   | 0.5190 | 2.4493  | 0.1176 |
| <b>coff_3</b>     | 0.4310   | 0.1919 | 5.0454  | 0.0247 |
| <b>coff_3_ti</b>  | 0.5362   | 0.5234 | 1.0493  | 0.3057 |
| <b>coff_4</b>     | 0.1935   | 0.1244 | 2.4166  | 0.1201 |
| <b>coff_4_ti</b>  | 0.1985   | 0.1667 | 1.4168  | 0.2339 |
| <b>whgrn_1</b>    | 0.0736   | 0.1528 | 0.2320  | 0.6300 |
| <b>whgrn_1_ti</b> | 0.0748   | 0.2428 | 0.0948  | 0.7582 |
| <b>whgrn_2</b>    | -0.0556  | 0.1406 | 0.1564  | 0.6925 |
| <b>whgrn_2_ti</b> | -0.0353  | 0.2412 | 0.0214  | 0.8837 |
| <b>whgrn_3</b>    | 0.1017   | 0.1286 | 0.6259  | 0.4289 |
| <b>whgrn_3_ti</b> | 0.2776   | 0.3000 | 0.8562  | 0.3548 |
| <b>whgrn_4</b>    | -0.00285 | 0.1234 | 0.0005  | 0.9816 |
| <b>whgrn_4_ti</b> | 0.7540   | 0.4051 | 3.4638  | 0.0627 |
| <b>soda_1</b>     | -0.1423  | 0.1787 | 0.6337  | 0.4260 |
| <b>soda_1_ti</b>  | -0.00346 | 0.1103 | 0.0010  | 0.9750 |
| <b>soda_2</b>     | 0.0201   | 0.1559 | 0.0166  | 0.8974 |
| <b>soda_2_ti</b>  | -0.00501 | 0.0955 | 0.0028  | 0.9581 |
| <b>soda_3</b>     | -0.0717  | 0.1556 | 0.2122  | 0.6451 |
| <b>soda_3_ti</b>  | -0.0725  | 0.1052 | 0.4746  | 0.4909 |
| <b>soda_4</b>     | 0.1252   | 0.1476 | 0.7193  | 0.3964 |
| <b>soda_4_ti</b>  | -0.1097  | 0.1146 | 0.9171  | 0.3382 |
| <b>cal_1</b>      | -0.0462  | 0.1675 | 0.0760  | 0.7828 |
| <b>cal_1_ti</b>   | 0.3522   | 0.2855 | 1.5221  | 0.2173 |
| <b>cal_2</b>      | -0.0929  | 0.1514 | 0.3765  | 0.5395 |
| <b>cal_2_ti</b>   | 0.2212   | 0.2611 | 0.7178  | 0.3969 |
| <b>cal_3</b>      | -0.2489  | 0.1460 | 2.9086  | 0.0881 |
| <b>cal_3_ti</b>   | 0.0637   | 0.2450 | 0.0675  | 0.7950 |
| <b>cal_4</b>      | -0.1541  | 0.1355 | 1.2928  | 0.2555 |
| <b>cal_4_ti</b>   | 0.0243   | 0.2426 | 0.0101  | 0.9201 |
| <b>alc_1</b>      | 0.5630   | 0.1717 | 10.7538 | 0.0010 |
| <b>alc_1_ti</b>   | 0.0832   | 0.1927 | 0.1865  | 0.6658 |
| <b>alc_2</b>      | 0.2322   | 0.1665 | 1.9449  | 0.1631 |
| <b>alc_2_ti</b>   | 0.0306   | 0.2139 | 0.0204  | 0.8864 |
| <b>alc_3</b>      | -0.0604  | 0.1850 | 0.1065  | 0.7441 |

|                 |         |        |          |        |
|-----------------|---------|--------|----------|--------|
| <b>alc_3_ti</b> | 0.0758  | 0.2632 | 0.0830   | 0.7733 |
| <b>cig_1</b>    | 2.2317  | 0.4116 | 29.3926  | <.0001 |
| <b>cig_2</b>    | 1.2857  | 0.4847 | 7.0357   | 0.0080 |
| <b>cig_3</b>    | 1.1303  | 0.4335 | 6.7971   | 0.0091 |
| <b>cig_4</b>    | 0.4268  | 0.4167 | 1.0493   | 0.3057 |
| <b>mvi</b>      | -0.1667 | 0.0742 | 5.0440   | 0.0247 |
| <b>act_1</b>    | 0.4495  | 0.1333 | 11.3714  | 0.0007 |
| <b>act_1_ti</b> | -0.0936 | 0.1808 | 0.2679   | 0.6047 |
| <b>act_2</b>    | 0.3064  | 0.1435 | 4.5593   | 0.0327 |
| <b>act_2_ti</b> | 0.0172  | 0.2084 | 0.0068   | 0.9342 |
| <b>act_3</b>    | 0.3797  | 0.2386 | 2.5330   | 0.1115 |
| <b>act_3_ti</b> | -0.3158 | 0.4092 | 0.5956   | 0.4402 |
| <b>act_4</b>    | 0.2700  | 0.1574 | 2.9422   | 0.0863 |
| <b>act_4_ti</b> | -0.3298 | 0.3063 | 1.1591   | 0.2817 |
| <b>act_5</b>    | 0.2620  | 0.2657 | 0.9728   | 0.3240 |
| <b>act_5_ti</b> | -0.2372 | 0.5524 | 0.1844   | 0.6676 |
| <b>can</b>      | 0.0440  | 0.1610 | 0.0747   | 0.7846 |
| <b>bmi_1</b>    | 2.3947  | 0.3451 | 48.1628  | <.0001 |
| <b>bmi_2</b>    | 1.9061  | 0.2718 | 49.1832  | <.0001 |
| <b>bmi_3</b>    | 1.5327  | 0.2552 | 36.0770  | <.0001 |
| <b>bmi_4</b>    | 1.0748  | 0.2375 | 20.4806  | <.0001 |
| <b>bmi_5</b>    | 0.5480  | 0.2152 | 6.4861   | 0.0109 |
| <b>chl</b>      | 0.2145  | 0.1217 | 3.1057   | 0.0780 |
| <b>hbp</b>      | 1.3028  | 0.1066 | 149.3714 | <.0001 |
| <b>sta</b>      | 0.4838  | 0.0903 | 28.6994  | <.0001 |
| <b>sta_ti</b>   | -0.1615 | 0.2178 | 0.5500   | 0.4583 |
| <b>asn_1</b>    | -0.5637 | 0.0792 | 50.6771  | <.0001 |
| <b>asn_2</b>    | -0.8689 | 0.0925 | 88.1351  | <.0001 |
| <b>angcbg</b>   | 0.4645  | 0.1650 | 7.9211   | 0.0049 |

---

(FF) Logistic model to estimate the probability of incident myocardial infarction

| <b>Variable</b>      | <b>Log odds ratio</b> | <b>Standard error</b> | <b>Wald chi-square</b> | <b>P value</b> |
|----------------------|-----------------------|-----------------------|------------------------|----------------|
| <b>Intercept</b>     | -10.3800              | 2.1793                | 22.6858                | <.0001         |
| <b>fhx</b>           | -0.0582               | 0.0835                | 0.4864                 | 0.4855         |
| <b>smkhx</b>         | 0.0573                | 0.0887                | 0.4172                 | 0.5183         |
| <b>ochx</b>          | -0.00309              | 0.0730                | 0.0018                 | 0.9662         |
| <b>employed_1</b>    | -0.1215               | 0.1354                | 0.8045                 | 0.3697         |
| <b>employed_2</b>    | -0.2126               | 0.2211                | 0.9244                 | 0.3363         |
| <b>employed_3</b>    | -0.2206               | 0.1078                | 4.1857                 | 0.0408         |
| <b>employed_4</b>    | -0.1466               | 0.1482                | 0.9786                 | 0.3226         |
| <b>employed_5</b>    | -0.1281               | 0.0968                | 1.7502                 | 0.1859         |
| <b>employed_6</b>    | 0.0252                | 0.1453                | 0.0300                 | 0.8625         |
| <b>employed_miss</b> | -0.4617               | 0.4032                | 1.3110                 | 0.2522         |
| <b>mar80</b>         | 0.0166                | 0.1188                | 0.0196                 | 0.8887         |
| <b>college</b>       | -0.1758               | 0.0847                | 4.3102                 | 0.0379         |
| <b>stress82</b>      | 0.00428               | 0.0825                | 0.0027                 | 0.9586         |
| <b>stress82_miss</b> | 0.4291                | 0.3601                | 1.4201                 | 0.2334         |
| <b>hhighsch</b>      | -0.0611               | 0.0910                | 0.4511                 | 0.5018         |
| <b>hcollege</b>      | -0.1752               | 0.1053                | 2.7697                 | 0.0961         |
| <b>hgradsch</b>      | -0.0745               | 0.1123                | 0.4409                 | 0.5067         |
| <b>lbmi18_2</b>      | 0.00594               | 0.0842                | 0.0050                 | 0.9437         |
| <b>lbmi18_3</b>      | 0.0959                | 0.1246                | 0.5923                 | 0.4415         |
| <b>lbmi18_4</b>      | 0.5860                | 0.2338                | 6.2790                 | 0.0122         |
| <b>baseage</b>       | 0.0759                | 0.0823                | 0.8507                 | 0.3563         |
| <b>baseage_sq</b>    | -0.00030              | 0.000785              | 0.1488                 | 0.6997         |
| <b>bmi80_1</b>       | 0.1971                | 0.4281                | 0.2120                 | 0.6452         |
| <b>bmi80_2</b>       | -0.2216               | 0.2956                | 0.5618                 | 0.4535         |
| <b>bmi80_3</b>       | -0.2438               | 0.2798                | 0.7592                 | 0.3836         |
| <b>bmi80_4</b>       | -0.2886               | 0.2653                | 1.1830                 | 0.2767         |
| <b>bmi80_5</b>       | 0.00310               | 0.2513                | 0.0002                 | 0.9902         |
| <b>act80_1</b>       | -0.0103               | 0.0948                | 0.0118                 | 0.9136         |
| <b>act80_2</b>       | -0.0479               | 0.1146                | 0.1748                 | 0.6758         |
| <b>act80_3</b>       | 0.00330               | 0.1004                | 0.0011                 | 0.9738         |
| <b>alc80_1</b>       | 0.00622               | 0.1132                | 0.0030                 | 0.9562         |



|                    |          |        |         |        |
|--------------------|----------|--------|---------|--------|
| <b>alc80_2</b>     | 0.0942   | 0.1108 | 0.7218  | 0.3956 |
| <b>alc80_3</b>     | 0.1023   | 0.1260 | 0.6596  | 0.4167 |
| <b>rpmeats80_1</b> | -0.1621  | 0.1892 | 0.7336  | 0.3917 |
| <b>rpmeats80_2</b> | -0.0410  | 0.1158 | 0.1251  | 0.7235 |
| <b>rpmeats80_3</b> | -0.5065  | 0.1171 | 18.7057 | <.0001 |
| <b>rpmeats80_4</b> | -0.0861  | 0.0944 | 0.8336  | 0.3612 |
| <b>coff80_1</b>    | 0.1294   | 0.0955 | 1.8351  | 0.1755 |
| <b>coff80_2</b>    | 0.2651   | 0.1412 | 3.5267  | 0.0604 |
| <b>coff80_3</b>    | -0.1425  | 0.2423 | 0.3458  | 0.5565 |
| <b>whgrn80_1</b>   | -0.1361  | 0.0966 | 1.9853  | 0.1588 |
| <b>whgrn80_2</b>   | -0.1210  | 0.1029 | 1.3823  | 0.2397 |
| <b>soda80_1</b>    | 0.1942   | 0.1199 | 2.6242  | 0.1052 |
| <b>soda80_2</b>    | -0.0530  | 0.1137 | 0.2170  | 0.6413 |
| <b>soda80_3</b>    | -0.2067  | 0.1167 | 3.1378  | 0.0765 |
| <b>soda80_4</b>    | -0.00364 | 0.1082 | 0.0011  | 0.9732 |
| <b>cig80_1</b>     | -0.0206  | 0.2344 | 0.0078  | 0.9298 |
| <b>cig80_2</b>     | -0.0767  | 0.3323 | 0.0533  | 0.8174 |
| <b>cig80_3</b>     | 0.2836   | 0.2484 | 1.3026  | 0.2537 |
| <b>cig80_4</b>     | 0.5418   | 0.2172 | 6.2238  | 0.0126 |
| <b>period_2</b>    | -0.4146  | 0.6422 | 0.4168  | 0.5185 |
| <b>period_3</b>    | -0.2698  | 0.4776 | 0.3192  | 0.5721 |
| <b>period_4</b>    | -0.6626  | 0.4098 | 2.6142  | 0.1059 |
| <b>period_5</b>    | 0.5304   | 0.4582 | 1.3402  | 0.2470 |
| <b>period_6</b>    | -0.5870  | 0.1769 | 11.0106 | 0.0009 |
| <b>period_7</b>    | 0.3988   | 0.3970 | 1.0087  | 0.3152 |
| <b>period_8</b>    | -0.3942  | 0.1547 | 6.4910  | 0.0108 |
| <b>period_9</b>    | 0.3852   | 0.3990 | 0.9321  | 0.3343 |
| <b>period_10</b>   | -0.3620  | 0.1477 | 6.0107  | 0.0142 |
| <b>period_11</b>   | -0.0114  | 0.4061 | 0.0008  | 0.9777 |
| <b>mnp_l2</b>      | -0.00812 | 0.1921 | 0.0018  | 0.9663 |
| <b>mnp_l1</b>      | 0.2344   | 0.2903 | 0.6519  | 0.4194 |
| <b>pmh_l2</b>      | 0.0832   | 0.1093 | 0.5791  | 0.4467 |
| <b>pmh_l1</b>      | -0.0450  | 0.1260 | 0.1276  | 0.7209 |
| <b>ost_l2</b>      | 0.3570   | 0.1970 | 3.2832  | 0.0700 |
| <b>ost_l1</b>      | 0.0194   | 0.2492 | 0.0060  | 0.9381 |

|                        |         |        |        |        |
|------------------------|---------|--------|--------|--------|
| <b>rpmeats_l1_1</b>    | -0.2566 | 0.5425 | 0.2238 | 0.6362 |
| <b>rpmeats_l1_1_ti</b> | -0.0619 | 0.2800 | 0.0489 | 0.8250 |
| <b>rpmeats_l1_2</b>    | 0.0351  | 0.4139 | 0.0072 | 0.9325 |
| <b>rpmeats_l1_2_ti</b> | -0.2080 | 0.2199 | 0.8952 | 0.3441 |
| <b>rpmeats_l1_3</b>    | 0.2263  | 0.3798 | 0.3551 | 0.5513 |
| <b>rpmeats_l1_3_ti</b> | -0.2276 | 0.2046 | 1.2383 | 0.2658 |
| <b>rpmeats_l1_4</b>    | -0.0200 | 0.3509 | 0.0032 | 0.9546 |
| <b>rpmeats_l1_4_ti</b> | -0.1664 | 0.1926 | 0.7466 | 0.3876 |
| <b>coff_l1_1</b>       | -2.2400 | 0.7649 | 8.5768 | 0.0034 |
| <b>coff_l1_1_ti</b>    | 0.6712  | 0.3846 | 3.0450 | 0.0810 |
| <b>coff_l1_2</b>       | -0.2429 | 0.5122 | 0.2249 | 0.6354 |
| <b>coff_l1_2_ti</b>    | -0.0211 | 0.2672 | 0.0062 | 0.9372 |
| <b>coff_l1_3</b>       | -0.0502 | 0.5607 | 0.0080 | 0.9286 |
| <b>coff_l1_3_ti</b>    | -0.0799 | 0.2998 | 0.0711 | 0.7897 |
| <b>coff_l1_4</b>       | -0.4633 | 0.2792 | 2.7538 | 0.0970 |
| <b>coff_l1_4_ti</b>    | 0.2307  | 0.1475 | 2.4475 | 0.1177 |
| <b>whgrn_l1_1</b>      | 0.5502  | 0.4764 | 1.3339 | 0.2481 |
| <b>whgrn_l1_1_ti</b>   | -0.2544 | 0.2478 | 1.0537 | 0.3047 |
| <b>whgrn_l1_2</b>      | 1.0329  | 0.4499 | 5.2720 | 0.0217 |
| <b>whgrn_l1_2_ti</b>   | -0.4681 | 0.2350 | 3.9677 | 0.0464 |
| <b>whgrn_l1_3</b>      | 0.0940  | 0.5207 | 0.0326 | 0.8567 |
| <b>whgrn_l1_3_ti</b>   | -0.0825 | 0.2701 | 0.0934 | 0.7599 |
| <b>whgrn_l1_4</b>      | 0.4065  | 0.4905 | 0.6868 | 0.4072 |
| <b>whgrn_l1_4_ti</b>   | -0.2554 | 0.2553 | 1.0011 | 0.3170 |
| <b>soda_l1_1</b>       | -0.0736 | 0.3102 | 0.0562 | 0.8126 |
| <b>soda_l1_1_ti</b>    | 0.0941  | 0.1143 | 0.6778 | 0.4103 |
| <b>soda_l1_2</b>       | 0.1861  | 0.2740 | 0.4612 | 0.4971 |
| <b>soda_l1_2_ti</b>    | -0.0318 | 0.1052 | 0.0913 | 0.7625 |
| <b>soda_l1_3</b>       | -0.1695 | 0.2796 | 0.3678 | 0.5442 |
| <b>soda_l1_3_ti</b>    | 0.1599  | 0.1079 | 2.1964 | 0.1383 |
| <b>soda_l1_4</b>       | -0.1759 | 0.2675 | 0.4324 | 0.5108 |
| <b>soda_l1_4_ti</b>    | 0.1125  | 0.1068 | 1.1097 | 0.2922 |
| <b>cal_l1_1</b>        | -0.3660 | 0.4572 | 0.6409 | 0.4234 |
| <b>cal_l1_1_ti</b>     | 0.2634  | 0.2388 | 1.2171 | 0.2699 |
| <b>cal_l1_2</b>        | -0.1710 | 0.4282 | 0.1595 | 0.6897 |

|                    |         |        |         |        |
|--------------------|---------|--------|---------|--------|
| <b>cal_l1_2_ti</b> | 0.0482  | 0.2257 | 0.0456  | 0.8308 |
| <b>cal_l1_3</b>    | -0.5828 | 0.4422 | 1.7374  | 0.1875 |
| <b>cal_l1_3_ti</b> | 0.3588  | 0.2319 | 2.3939  | 0.1218 |
| <b>cal_l1_4</b>    | 0.0729  | 0.3871 | 0.0354  | 0.8507 |
| <b>cal_l1_4_ti</b> | -0.0240 | 0.2069 | 0.0135  | 0.9076 |
| <b>alc_l1_1</b>    | 0.0192  | 0.3819 | 0.0025  | 0.9598 |
| <b>alc_l1_1_ti</b> | 0.1001  | 0.1853 | 0.2918  | 0.5891 |
| <b>alc_l1_2</b>    | 0.6248  | 0.3675 | 2.8899  | 0.0891 |
| <b>alc_l1_2_ti</b> | -0.2256 | 0.1868 | 1.4592  | 0.2271 |
| <b>alc_l1_3</b>    | 0.0417  | 0.5102 | 0.0067  | 0.9349 |
| <b>alc_l1_3_ti</b> | 0.0136  | 0.2691 | 0.0025  | 0.9598 |
| <b>cig_l2_1</b>    | -0.4490 | 0.3670 | 1.4972  | 0.2211 |
| <b>cig_l1_1</b>    | -1.4347 | 0.3611 | 15.7815 | <.0001 |
| <b>cig_l2_2</b>    | -0.2591 | 0.4484 | 0.3338  | 0.5634 |
| <b>cig_l1_2</b>    | -0.8296 | 0.4436 | 3.4974  | 0.0615 |
| <b>cig_l2_3</b>    | 0.2895  | 0.3614 | 0.6414  | 0.4232 |
| <b>cig_l1_3</b>    | -0.4532 | 0.3634 | 1.5546  | 0.2125 |
| <b>cig_l2_4</b>    | 0.1248  | 0.3264 | 0.1462  | 0.7022 |
| <b>cig_l1_4</b>    | -0.0404 | 0.3247 | 0.0155  | 0.9009 |
| <b>mvi_l2</b>      | 0.0234  | 0.0795 | 0.0866  | 0.7685 |
| <b>mvi_l1</b>      | -0.0949 | 0.0843 | 1.2675  | 0.2602 |
| <b>act_l1_1</b>    | 0.1918  | 0.1457 | 1.7343  | 0.1879 |
| <b>act_l1_1_ti</b> | -0.0730 | 0.1338 | 0.2977  | 0.5854 |
| <b>act_l1_2</b>    | 0.0440  | 0.1606 | 0.0751  | 0.7840 |
| <b>act_l1_2_ti</b> | -0.0182 | 0.1583 | 0.0133  | 0.9083 |
| <b>act_l1_3</b>    | 0.1311  | 0.2729 | 0.2306  | 0.6311 |
| <b>act_l1_3_ti</b> | 0.1564  | 0.3099 | 0.2548  | 0.6137 |
| <b>act_l1_4</b>    | 0.1143  | 0.1777 | 0.4140  | 0.5200 |
| <b>act_l1_4_ti</b> | -0.3086 | 0.1807 | 2.9158  | 0.0877 |
| <b>act_l1_5</b>    | -0.2202 | 0.3413 | 0.4161  | 0.5189 |
| <b>act_l1_5_ti</b> | 0.0336  | 0.4161 | 0.0065  | 0.9357 |
| <b>can_l2</b>      | -0.0173 | 0.2939 | 0.0035  | 0.9531 |
| <b>can_l1</b>      | 0.3913  | 0.3612 | 1.1735  | 0.2787 |
| <b>bmi_l2_1</b>    | -1.0628 | 0.5582 | 3.6252  | 0.0569 |
| <b>bmi_l1_1</b>    | -0.7105 | 0.5554 | 1.6362  | 0.2008 |

|                     |         |        |          |        |
|---------------------|---------|--------|----------|--------|
| <b>bmi_l2_2</b>     | -0.6974 | 0.3494 | 3.9849   | 0.0459 |
| <b>bmi_l1_2</b>     | -0.2922 | 0.3613 | 0.6541   | 0.4187 |
| <b>bmi_l2_3</b>     | -0.3822 | 0.3194 | 1.4316   | 0.2315 |
| <b>bmi_l1_3</b>     | -0.0560 | 0.3307 | 0.0287   | 0.8655 |
| <b>bmi_l2_4</b>     | -0.1783 | 0.2942 | 0.3672   | 0.5445 |
| <b>bmi_l1_4</b>     | 0.2082  | 0.3040 | 0.4690   | 0.4935 |
| <b>bmi_l2_5</b>     | 0.0925  | 0.2548 | 0.1318   | 0.7166 |
| <b>bmi_l1_5</b>     | 0.1338  | 0.2660 | 0.2531   | 0.6149 |
| <b>chl_l2</b>       | 0.2391  | 0.1517 | 2.4855   | 0.1149 |
| <b>chl_l1</b>       | -0.6338 | 0.1704 | 13.8414  | 0.0002 |
| <b>hbp_l2</b>       | 0.1402  | 0.1585 | 0.7816   | 0.3767 |
| <b>hbp_l1</b>       | -0.0324 | 0.1932 | 0.0282   | 0.8667 |
| <b>sta_l1</b>       | -0.7157 | 0.1132 | 39.9740  | <.0001 |
| <b>sta_l1_ti</b>    | 0.2018  | 0.1164 | 3.0069   | 0.0829 |
| <b>asn_l2_1</b>     | 0.1532  | 0.1039 | 2.1756   | 0.1402 |
| <b>asn_l1_1</b>     | 0.6569  | 0.1072 | 37.5680  | <.0001 |
| <b>asn_l2_2</b>     | 0.0667  | 0.1006 | 0.4387   | 0.5078 |
| <b>asn_l1_2</b>     | 0.3884  | 0.1021 | 14.4694  | 0.0001 |
| <b>angcbg_l2</b>    | -0.8211 | 0.1869 | 19.2986  | <.0001 |
| <b>angcbg_l1</b>    | -1.9704 | 0.1614 | 149.0304 | <.0001 |
| <b>str_l2</b>       | -1.2323 | 0.4772 | 6.6689   | 0.0098 |
| <b>str_l1</b>       | -0.1704 | 0.3875 | 0.1933   | 0.6602 |
| <b>mnp</b>          | -0.1370 | 0.2718 | 0.2540   | 0.6143 |
| <b>pmh</b>          | -0.0608 | 0.1097 | 0.3079   | 0.5790 |
| <b>ost</b>          | -0.2657 | 0.1777 | 2.2360   | 0.1348 |
| <b>rpmeats_1</b>    | 0.8792  | 0.2017 | 19.0001  | <.0001 |
| <b>rpmeats_1_ti</b> | -0.3449 | 0.2875 | 1.4394   | 0.2302 |
| <b>rpmeats_2</b>    | 0.6083  | 0.1916 | 10.0787  | 0.0015 |
| <b>rpmeats_2_ti</b> | -0.3794 | 0.2300 | 2.7200   | 0.0991 |
| <b>rpmeats_3</b>    | 0.6460  | 0.1862 | 12.0308  | 0.0005 |
| <b>rpmeats_3_ti</b> | -0.5626 | 0.2182 | 6.6479   | 0.0099 |
| <b>rpmeats_4</b>    | 0.3701  | 0.1888 | 3.8417   | 0.0500 |
| <b>rpmeats_4_ti</b> | -0.1507 | 0.2064 | 0.5328   | 0.4654 |
| <b>coff_1</b>       | 0.8036  | 0.2320 | 12.0000  | 0.0005 |
| <b>coff_1_ti</b>    | 0.7926  | 0.3840 | 4.2604   | 0.0390 |

|                   |         |        |         |        |
|-------------------|---------|--------|---------|--------|
| <b>coff_2</b>     | 0.5165  | 0.2073 | 6.2085  | 0.0127 |
| <b>coff_2_ti</b>  | -0.0745 | 0.2730 | 0.0744  | 0.7850 |
| <b>coff_3</b>     | 0.3870  | 0.2286 | 2.8651  | 0.0905 |
| <b>coff_3_ti</b>  | -0.1699 | 0.3099 | 0.3006  | 0.5835 |
| <b>coff_4</b>     | 0.4616  | 0.1347 | 11.7397 | 0.0006 |
| <b>coff_4_ti</b>  | -0.0456 | 0.1522 | 0.0899  | 0.7643 |
| <b>whgrn_1</b>    | -0.3149 | 0.1768 | 3.1725  | 0.0749 |
| <b>whgrn_1_ti</b> | 0.0844  | 0.2544 | 0.1101  | 0.7400 |
| <b>whgrn_2</b>    | 0.0281  | 0.1508 | 0.0347  | 0.8523 |
| <b>whgrn_2_ti</b> | -0.4744 | 0.2433 | 3.8009  | 0.0512 |
| <b>whgrn_3</b>    | -0.2222 | 0.1491 | 2.2217  | 0.1361 |
| <b>whgrn_3_ti</b> | 0.2017  | 0.2772 | 0.5294  | 0.4669 |
| <b>whgrn_4</b>    | 0.1086  | 0.1311 | 0.6867  | 0.4073 |
| <b>whgrn_4_ti</b> | -0.1589 | 0.2630 | 0.3649  | 0.5458 |
| <b>soda_1</b>     | -0.2160 | 0.1963 | 1.2114  | 0.2711 |
| <b>soda_1_ti</b>  | 0.1315  | 0.1162 | 1.2807  | 0.2578 |
| <b>soda_2</b>     | -0.2720 | 0.1736 | 2.4543  | 0.1172 |
| <b>soda_2_ti</b>  | 0.0879  | 0.1074 | 0.6700  | 0.4130 |
| <b>soda_3</b>     | -0.2563 | 0.1697 | 2.2825  | 0.1308 |
| <b>soda_3_ti</b>  | 0.1046  | 0.1114 | 0.8820  | 0.3477 |
| <b>soda_4</b>     | -0.1485 | 0.1626 | 0.8342  | 0.3610 |
| <b>soda_4_ti</b>  | 0.1673  | 0.1082 | 2.3923  | 0.1219 |
| <b>cal_1</b>      | -0.2563 | 0.1927 | 1.7692  | 0.1835 |
| <b>cal_1_ti</b>   | 0.2853  | 0.2445 | 1.3618  | 0.2432 |
| <b>cal_2</b>      | -0.0663 | 0.1714 | 0.1493  | 0.6992 |
| <b>cal_2_ti</b>   | 0.1512  | 0.2309 | 0.4289  | 0.5126 |
| <b>cal_3</b>      | -0.1868 | 0.1653 | 1.2769  | 0.2585 |
| <b>cal_3_ti</b>   | 0.3283  | 0.2413 | 1.8514  | 0.1736 |
| <b>cal_4</b>      | -0.0733 | 0.1546 | 0.2248  | 0.6354 |
| <b>cal_4_ti</b>   | -0.0321 | 0.2159 | 0.0220  | 0.8820 |
| <b>alc_1</b>      | 0.3348  | 0.1982 | 2.8528  | 0.0912 |
| <b>alc_1_ti</b>   | -0.1362 | 0.1874 | 0.5282  | 0.4674 |
| <b>alc_2</b>      | 0.2070  | 0.1915 | 1.1683  | 0.2798 |
| <b>alc_2_ti</b>   | -0.3403 | 0.1902 | 3.2011  | 0.0736 |
| <b>alc_3</b>      | 0.0343  | 0.2119 | 0.0261  | 0.8716 |

|                 |          |        |           |        |
|-----------------|----------|--------|-----------|--------|
| <b>alc_3_ti</b> | -0.1019  | 0.2789 | 0.1336    | 0.7147 |
| <b>cig_1</b>    | 1.6711   | 0.4209 | 15.7636   | <.0001 |
| <b>cig_2</b>    | 0.4217   | 0.5141 | 0.6729    | 0.4121 |
| <b>cig_3</b>    | -0.00066 | 0.4579 | 0.0000    | 0.9988 |
| <b>cig_4</b>    | -0.2814  | 0.4312 | 0.4260    | 0.5140 |
| <b>mvi</b>      | -0.1925  | 0.0800 | 5.7926    | 0.0161 |
| <b>act_1</b>    | -0.1991  | 0.1301 | 2.3421    | 0.1259 |
| <b>act_1_ti</b> | 0.1917   | 0.1975 | 0.9418    | 0.3318 |
| <b>act_2</b>    | -0.00309 | 0.1392 | 0.0005    | 0.9823 |
| <b>act_2_ti</b> | -0.0274  | 0.2419 | 0.0128    | 0.9098 |
| <b>act_3</b>    | 0.0105   | 0.2570 | 0.0017    | 0.9674 |
| <b>act_3_ti</b> | 0.2021   | 0.3798 | 0.2830    | 0.5948 |
| <b>act_4</b>    | -0.00016 | 0.1559 | 0.0000    | 0.9992 |
| <b>act_4_ti</b> | -0.0143  | 0.2894 | 0.0025    | 0.9605 |
| <b>act_5</b>    | -0.2468  | 0.2917 | 0.7158    | 0.3975 |
| <b>act_5_ti</b> | 0.0892   | 0.5729 | 0.0242    | 0.8763 |
| <b>can</b>      | -0.4321  | 0.2513 | 2.9552    | 0.0856 |
| <b>bmi_1</b>    | 1.9681   | 0.4095 | 23.0924   | <.0001 |
| <b>bmi_2</b>    | 1.4615   | 0.2945 | 24.6337   | <.0001 |
| <b>bmi_3</b>    | 0.8723   | 0.2747 | 10.0825   | 0.0015 |
| <b>bmi_4</b>    | 0.2628   | 0.2545 | 1.0660    | 0.3018 |
| <b>bmi_5</b>    | 0.00989  | 0.2279 | 0.0019    | 0.9654 |
| <b>chl</b>      | 0.3946   | 0.1177 | 11.2295   | 0.0008 |
| <b>hbp</b>      | 0.2175   | 0.1340 | 2.6344    | 0.1046 |
| <b>sta</b>      | 1.1721   | 0.0938 | 156.1588  | <.0001 |
| <b>sta_ti</b>   | -0.2937  | 0.1575 | 3.4781    | 0.0622 |
| <b>asn_1</b>    | -1.5895  | 0.0980 | 262.8175  | <.0001 |
| <b>asn_2</b>    | -1.2898  | 0.1028 | 157.3305  | <.0001 |
| <b>angcbg</b>   | 4.2159   | 0.0786 | 2873.9476 | <.0001 |
| <b>str</b>      | 1.4044   | 0.2193 | 40.9909   | <.0001 |

---

## References

1. Taubman SL, Robins JM, Mittleman MA, Hernan MA. Intervening on risk factors for coronary heart disease: an application of the parametric g-formula. *Int J Epidemiol* 2009;**38**(6):1599-611.
